# Supplementary material
Source: publisher figshare collection journal article supplement (https://acs.figshare.com/ndownloader/files/3798661)
Supplement: Supplementary file 1 [file 3798661]

 
data_exp_4715
 
_audit_creation_method            SHELXL-2014/6
_chemical_name_systematic         ?
_chemical_name_common             ?
_chemical_melting_point           '>463 dec'
_chemical_formula_moiety          'C42 H52 N4 O4, C H Cl3. 3H2 O'
_chemical_formula_sum
 'C43 H59 Cl3 N4 O7' 
_chemical_formula_weight          850.29

loop_
 _atom_type_symbol
 _atom_type_description
 _atom_type_scat_dispersion_real
 _atom_type_scat_dispersion_imag
 _atom_type_scat_source
 'C'  'C'   0.0033   0.0016
 'International Tables Vol C Tables 4.2.6.8 and 6.1.1.4'
 'H'  'H'   0.0000   0.0000
 'International Tables Vol C Tables 4.2.6.8 and 6.1.1.4'
 'N'  'N'   0.0061   0.0033
 'International Tables Vol C Tables 4.2.6.8 and 6.1.1.4'
 'O'  'O'   0.0106   0.0060
 'International Tables Vol C Tables 4.2.6.8 and 6.1.1.4'
 'Cl'  'Cl'   0.1484   0.1585
 'International Tables Vol C Tables 4.2.6.8 and 6.1.1.4'
 
_space_group_crystal_system       hexagonal
_space_group_IT_number            170
_space_group_name_H-M_alt         'P 65'
_space_group_name_Hall            'P 65'
 
_shelx_space_group_comment
;
The symmetry employed for this shelxl refinement is uniquely defined
by the following loop, which should always be used as a source of
symmetry information in preference to the above space-group names.
They are only intended as comments.
;
 
loop_
 _space_group_symop_operation_xyz
 'x, y, z'
 'x-y, x, z+5/6'
 '-y, x-y, z+2/3'
 '-x, -y, z+1/2'
 '-x+y, -x, z+1/3'
 'y, -x+y, z+1/6'
 
_cell_length_a                    25.987(3)
_cell_length_b                    25.987(3)
_cell_length_c                    12.7789(12)
_cell_angle_alpha                 90
_cell_angle_beta                  90
_cell_angle_gamma                 120
_cell_volume                      7473.6(17)
_cell_formula_units_Z             6
_cell_measurement_temperature     100.1(5) 
_cell_measurement_reflns_used     2168
_cell_measurement_theta_min       3.5310
_cell_measurement_theta_max       18.9670
 
_exptl_crystal_description        block
_exptl_crystal_colour             orange
_exptl_crystal_density_meas       ?
_exptl_crystal_density_method     ?
_exptl_crystal_density_diffrn     1.134          
_exptl_crystal_F_000              2712
_exptl_transmission_factor_min    ?
_exptl_transmission_factor_max    ?
_exptl_crystal_size_max           0.4
_exptl_crystal_size_mid           0.2
_exptl_crystal_size_min           0.2
_exptl_absorpt_coefficient_mu     0.231
_shelx_estimated_absorpt_T_min    ?
_shelx_estimated_absorpt_T_max    ?
_exptl_absorpt_correction_type    'multi-scan'
_exptl_absorpt_correction_T_min   ?
_exptl_absorpt_correction_T_max   ?
_exptl_absorpt_process_details    
;
CrysAlisPro, Agilent Technologies,
Version 1.171.36.28 (release 01-02-2013 CrysAlis171 .NET)
(compiled Feb  1 2013,16:14:44)
Empirical absorption correction using spherical harmonics,
 implemented in SCALE3 ABSPACK scaling algorithm.
;
_exptl_absorpt_special_details    ?
_diffrn_ambient_temperature       100.1(5) 
_diffrn_radiation_wavelength      0.71073
_diffrn_radiation_type            MoK\a
_diffrn_source                    'SuperNova (Mo) X-ray Source'
_diffrn_measurement_device_type   'SuperNova, Dual, Cu at zero, Atlas'
_diffrn_measurement_method        '\w scans'
_diffrn_detector_area_resol_mean  10.4041
_diffrn_reflns_number             13170
_diffrn_reflns_av_unetI/netI      0.1270
_diffrn_reflns_av_R_equivalents   0.0837
_diffrn_reflns_limit_h_min        -26
_diffrn_reflns_limit_h_max        19
_diffrn_reflns_limit_k_min        -20
_diffrn_reflns_limit_k_max        30
_diffrn_reflns_limit_l_min        -12
_diffrn_reflns_limit_l_max        15
_diffrn_reflns_theta_min          3.149
_diffrn_reflns_theta_max          24.997
_diffrn_reflns_theta_full         25.000
_diffrn_measured_fraction_theta_max   0.954
_diffrn_measured_fraction_theta_full  0.954
_diffrn_reflns_Laue_measured_fraction_max    0.954
_diffrn_reflns_Laue_measured_fraction_full   0.954
_diffrn_reflns_point_group_measured_fraction_max   0.787
_diffrn_reflns_point_group_measured_fraction_full  0.787
_reflns_number_total              6910
_reflns_number_gt                 3366
_reflns_threshold_expression      'I > 2\s(I)'
_reflns_Friedel_coverage          0.572
_reflns_Friedel_fraction_max      0.602
_reflns_Friedel_fraction_full     0.602
 
_reflns_special_details
;
 Reflections were merged by SHELXL according to the crystal
 class for the calculation of statistics and refinement.
 
 _reflns_Friedel_fraction is defined as the number of unique
 Friedel pairs measured divided by the number that would be
 possible theoretically, ignoring centric projections and
 systematic absences.
;
 
_computing_data_collection        'CrysAlis PRO  (Agilent, 2010)'
_computing_cell_refinement        'CrysAlis PRO'
_computing_data_reduction         'CrysAlis PRO'
_computing_structure_solution     'SHELXS-97 (Sheldrick, 2008)' 
_computing_structure_refinement 'SHELXL-2014/6 (Sheldrick, 2014)'
_computing_molecular_graphics     'X-Seed (Barbour, 2001)'
_computing_publication_material   'publCIF (Westrip, 2010)'
_refine_special_details           ?
_refine_ls_structure_factor_coef  Fsqd
_refine_ls_matrix_type            full
_refine_ls_weighting_scheme       calc
_refine_ls_weighting_details
'w=1/[\s^2^(Fo^2^)+(0.1000P)^2^] where P=(Fo^2^+2Fc^2^)/3'
_atom_sites_solution_primary      ?
_atom_sites_solution_secondary    ?
_atom_sites_solution_hydrogens    mixed
_refine_ls_hydrogen_treatment     constr
_refine_ls_extinction_method      none
_refine_ls_extinction_coef        .
_refine_ls_abs_structure_details
;
 Flack x determined using 954 quotients [(I+)-(I-)]/[(I+)+(I-)]
 (Parsons, Flack and Wagner, Acta Cryst. B69 (2013) 249-259).
;
_refine_ls_abs_structure_Flack    0.04(11)
_chemical_absolute_configuration  ?
_refine_ls_number_reflns          6910
_refine_ls_number_parameters      517
_refine_ls_number_restraints      28
_refine_ls_R_factor_all           0.1952
_refine_ls_R_factor_gt            0.1011
_refine_ls_wR_factor_ref          0.2847
_refine_ls_wR_factor_gt           0.2296
_refine_ls_goodness_of_fit_ref    1.183
_refine_ls_restrained_S_all       1.184
_refine_ls_shift/su_max           <0.001
_refine_ls_shift/su_mean          <0.001
 
loop_
 _atom_site_label
 _atom_site_type_symbol
 _atom_site_fract_x
 _atom_site_fract_y
 _atom_site_fract_z
 _atom_site_U_iso_or_equiv
 _atom_site_adp_type
 _atom_site_occupancy
 _atom_site_site_symmetry_order  
 _atom_site_calc_flag
 _atom_site_refinement_flags_posn
 _atom_site_refinement_flags_adp
 _atom_site_refinement_flags_occupancy
 _atom_site_disorder_assembly
 _atom_site_disorder_group
C1 C 0.7854(8) 0.3605(9) 0.0218(13) 0.121(7) Uani 1 1 d . . . . .
H1A H 0.8159 0.3490 0.0270 0.146 Uiso 1 1 calc R U . . .
C2 C 0.8382(6) 0.1715(7) 0.8053(16) 0.084(4) Uani 1 1 d . . . . .
C3 C 0.7999(6) 0.1864(5) 0.8722(9) 0.072(4) Uani 1 1 d . . . . .
H3 H 0.7720 0.1498 0.9089 0.086 Uiso 1 1 calc R U . . .
C5 C 0.7701(6) 0.1739(6) 0.5765(10) 0.083(5) Uani 1 1 d . . . . .
H5 H 0.7722 0.1474 0.5242 0.100 Uiso 1 1 calc R U . . .
C6 C 0.8339(7) 0.2114(7) 0.6245(14) 0.106(6) Uani 1 1 d . . . . .
H6A H 0.8627 0.2240 0.5681 0.127 Uiso 1 1 calc R U . . .
H6B H 0.8372 0.2469 0.6560 0.127 Uiso 1 1 calc R U . . .
C7 C 0.8501(7) 0.1794(9) 0.7062(19) 0.113(7) Uani 1 1 d . . . . .
C8 C 0.8882(8) 0.1528(10) 0.685(2) 0.131(8) Uani 1 1 d . . . . .
C9 C 0.9124(9) 0.1459(9) 0.595(2) 0.154(7) Uani 1 1 d . U . . .
H9 H 0.9089 0.1605 0.5309 0.184 Uiso 1 1 calc R U . . .
C10 C 0.9439(10) 0.1139(10) 0.609(2) 0.158(8) Uani 1 1 d . U . . .
H10 H 0.9624 0.1075 0.5527 0.190 Uiso 1 1 calc R U . . .
C11 C 0.9463(13) 0.0944(12) 0.700(3) 0.187(10) Uani 1 1 d . U . . .
H11 H 0.9671 0.0740 0.7057 0.225 Uiso 1 1 calc R U . . .
C12 C 0.9222(11) 0.1005(12) 0.786(2) 0.177(9) Uani 1 1 d . U . . .
H12 H 0.9261 0.0856 0.8496 0.212 Uiso 1 1 calc R U . . .
C13 C 0.8901(10) 0.1306(11) 0.776(3) 0.146(10) Uani 1 1 d . . . . .
C14 C 0.7610(5) 0.2097(5) 0.8145(8) 0.063(3) Uani 1 1 d . . . . .
H14A H 0.7422 0.2210 0.8683 0.075 Uiso 1 1 calc R U . . .
H14B H 0.7882 0.2457 0.7771 0.075 Uiso 1 1 calc R U . . .
C15 C 0.7130(5) 0.1695(5) 0.7382(9) 0.059(3) Uani 1 1 d . . . . .
H15 H 0.6787 0.1415 0.7799 0.071 Uiso 1 1 calc R U . . .
C16 C 0.7230(6) 0.1340(6) 0.6569(10) 0.071(4) Uani 1 1 d . . . . .
C17 C 0.6634(5) 0.0967(5) 0.5938(11) 0.079(4) Uani 1 1 d . . . . .
H17A H 0.6488 0.1223 0.5691 0.095 Uiso 1 1 calc R U . . .
H17B H 0.6702 0.0781 0.5336 0.095 Uiso 1 1 calc R U . . .
C18 C 0.6143(6) 0.1983(6) 0.8013(14) 0.091(5) Uani 1 1 d . . . . .
H18A H 0.6145 0.1633 0.8244 0.137 Uiso 1 1 calc R U . . .
H18B H 0.5747 0.1881 0.7814 0.137 Uiso 1 1 calc R U . . .
H18C H 0.6276 0.2268 0.8571 0.137 Uiso 1 1 calc R U . . .
C19 C 0.6534(7) 0.2234(6) 0.7128(11) 0.077(4) Uani 1 1 d . . . . .
H19 H 0.6488 0.2507 0.6728 0.092 Uiso 1 1 calc R U . . .
C20 C 0.6951(7) 0.2119(5) 0.6822(9) 0.073(4) Uani 1 1 d . . . . .
C21 C 0.7363(7) 0.2447(6) 0.5931(10) 0.099(5) Uani 1 1 d . . . . .
H21A H 0.7194 0.2642 0.5529 0.119 Uiso 1 1 calc R U . . .
H21B H 0.7738 0.2754 0.6218 0.119 Uiso 1 1 calc R U . . .
C22 C 0.7884(9) 0.2455(8) 0.4364(12) 0.146(9) Uani 1 1 d . . . . .
H22D H 0.7703 0.2647 0.3998 0.219 Uiso 1 1 calc R U . . .
H22E H 0.7948 0.2207 0.3887 0.219 Uiso 1 1 calc R U . . .
H22F H 0.8258 0.2750 0.4650 0.219 Uiso 1 1 calc R U . . .
C23 C 0.7312(6) 0.0849(7) 0.6998(13) 0.080(4) Uani 1 1 d . . . . .
C24 C 0.7608(8) 0.0140(8) 0.6580(16) 0.133(7) Uani 1 1 d . . . . .
H24A H 0.7848 0.0249 0.7201 0.200 Uiso 1 1 calc R U . . .
H24B H 0.7804 0.0051 0.6030 0.200 Uiso 1 1 calc R U . . .
H24C H 0.7229 -0.0204 0.6719 0.200 Uiso 1 1 calc R U . . .
C2' C 0.9790(5) 0.4054(5) 1.0938(9) 0.059(3) Uani 1 1 d . . . . .
C3' C 1.0394(6) 0.5069(6) 1.3279(10) 0.075(4) Uani 1 1 d . . . . .
H3'A H 1.0256 0.4703 1.3670 0.090 Uiso 1 1 calc R U . . .
H3'B H 1.0488 0.5387 1.3773 0.090 Uiso 1 1 calc R U . . .
C5' C 0.9342(5) 0.4473(6) 1.2783(10) 0.072(4) Uani 1 1 d . . . . .
H5'A H 0.9231 0.4514 1.3490 0.087 Uiso 1 1 calc R U . . .
H5'B H 0.9054 0.4487 1.2319 0.087 Uiso 1 1 calc R U . . .
C6' C 0.9262(6) 0.3881(6) 1.2700(10) 0.081(4) Uani 1 1 d . . . . .
H6'A H 0.8864 0.3596 1.2937 0.098 Uiso 1 1 calc R U . . .
H6'B H 0.9542 0.3852 1.3164 0.098 Uiso 1 1 calc R U . . .
C7' C 0.9346(5) 0.3716(5) 1.1612(8) 0.055(3) Uani 1 1 d . . . . .
C8' C 0.8937(6) 0.3190(6) 1.1051(10) 0.069(3) Uani 1 1 d . . . . .
C9' C 0.8400(6) 0.2691(6) 1.1317(9) 0.077(4) Uani 1 1 d . . . . .
H9' H 0.8239 0.2655 1.1981 0.093 Uiso 1 1 calc R U . . .
C10' C 0.8113(6) 0.2255(6) 1.0586(10) 0.075(4) Uani 1 1 d . . . . .
C11' C 0.8351(5) 0.2313(5) 0.9549(9) 0.062(3) Uani 1 1 d . . . . .
C12' C 0.8876(5) 0.2809(5) 0.9322(10) 0.065(3) Uani 1 1 d . . . . .
H12' H 0.9031 0.2856 0.8650 0.078 Uiso 1 1 calc R U . . .
C13' C 0.9187(6) 0.3247(5) 1.0065(9) 0.057(3) Uani 1 1 d . . . . .
C14' C 1.0945(6) 0.5202(7) 1.2669(11) 0.086(5) Uani 1 1 d . . . . .
H14' H 1.1258 0.5244 1.3149 0.103 Uiso 1 1 calc R U . . .
C15' C 1.1153(6) 0.5785(7) 1.2070(12) 0.090(4) Uani 1 1 d . . . . .
H15A H 1.1506 0.5880 1.1670 0.108 Uiso 1 1 calc R U . . .
H15B H 1.1252 0.6106 1.2562 0.108 Uiso 1 1 calc R U . . .
C16' C 1.0323(5) 0.4650(6) 1.1103(10) 0.070(3) Uani 1 1 d . . . . .
H16' H 1.0523 0.4785 1.0426 0.083 Uiso 1 1 calc R U . . .
C17' C 1.0792(5) 0.4695(6) 1.1902(11) 0.080(4) Uani 1 1 d . . . . .
H17C H 1.0637 0.4324 1.2283 0.096 Uiso 1 1 calc R U . . .
H17D H 1.1148 0.4765 1.1535 0.096 Uiso 1 1 calc R U . . .
C18' C 1.0195(9) 0.6307(7) 1.0623(13) 0.111(6) Uani 1 1 d . . . . .
H18D H 1.0417 0.6393 0.9984 0.167 Uiso 1 1 calc R U . . .
H18E H 1.0120 0.6625 1.0779 0.167 Uiso 1 1 calc R U . . .
H18F H 0.9824 0.5944 1.0546 0.167 Uiso 1 1 calc R U . . .
C19' C 1.0529(7) 0.6246(6) 1.1463(13) 0.092(5) Uani 1 1 d . . . . .
H19A H 1.0312 0.6187 1.2111 0.110 Uiso 1 1 calc R U . . .
H19B H 1.0905 0.6615 1.1527 0.110 Uiso 1 1 calc R U . . .
C20' C 1.0659(6) 0.5726(6) 1.1328(12) 0.082(4) Uani 1 1 d . . . . .
H20' H 1.0806 0.5751 1.0613 0.098 Uiso 1 1 calc R U . . .
O50 O 0.7445(7) 0.0390(8) 0.0439(13) 0.248(10) Uani 1 1 d G . . . .
H50A H 0.7342 0.0466 0.1024 0.372 Uiso 1 1 d G U . . .
H50B H 0.7189 0.0041 0.0246 0.372 Uiso 1 1 d G U . . .
O51 O 0.9280(7) 0.2319(9) 0.2977(12) 0.343(19) Uani 1 1 d G . . . .
H51A H 0.9423 0.2179 0.2537 0.514 Uiso 1 1 d G U . . .
H51B H 0.8942 0.2253 0.2766 0.514 Uiso 1 1 d G U . . .
O52 O 0.9678(6) 0.2013(10) 0.1133(13) 0.328(17) Uani 1 1 d G . . . .
H52A H 0.9363 0.1780 0.1467 0.492 Uiso 1 1 d G U . . .
H52B H 0.9610 0.1965 0.0479 0.492 Uiso 1 1 d G U . . .
C21' C 1.0125(5) 0.5103(5) 1.1459(9) 0.058(3) Uani 1 1 d . . . . .
H21' H 0.9802 0.5060 1.1007 0.070 Uiso 1 1 calc R U . . .
C22' C 0.7360(8) 0.1648(8) 1.1813(12) 0.127(7) Uani 1 1 d . . . . .
H22A H 0.7681 0.1744 1.2290 0.191 Uiso 1 1 calc R U . . .
H22B H 0.7061 0.1238 1.1896 0.191 Uiso 1 1 calc R U . . .
H22C H 0.7191 0.1895 1.1959 0.191 Uiso 1 1 calc R U . . .
Cl1 Cl 0.7283(3) 0.3178(3) 0.1121(5) 0.165(2) Uani 1 1 d . . . . .
Cl2 Cl 0.8178(2) 0.4357(3) 0.0540(4) 0.1359(19) Uani 1 1 d . . . . .
Cl3 Cl 0.7585(2) 0.34737(19) -0.1027(3) 0.1108(14) Uani 1 1 d . . . . .
N1 N 0.8618(7) 0.1417(6) 0.8488(14) 0.114(5) Uani 1 1 d . . . . .
H1 H 0.8589 0.1315 0.9135 0.136 Uiso 1 1 calc R U . . .
N4 N 0.7482(6) 0.2082(6) 0.5232(8) 0.095(4) Uani 1 1 d . . . . .
N1' N 0.9697(4) 0.3767(4) 1.0008(7) 0.056(2) Uani 1 1 d . . . . .
H1' H 0.9927 0.3898 0.9471 0.067 Uiso 1 1 calc R U . . .
N4' N 0.9922(4) 0.5008(4) 1.2566(7) 0.067(3) Uani 1 1 d . . . . .
O17 O 0.6210(4) 0.0522(4) 0.6630(6) 0.074(2) Uani 1 1 d . . . . .
H17 H 0.5876 0.0383 0.6379 0.111 Uiso 1 1 calc R U . . .
O23 O 0.7197(4) 0.0654(4) 0.7875(9) 0.078(3) Uani 1 1 d . . . . .
O24 O 0.7523(4) 0.0636(5) 0.6254(9) 0.111(4) Uani 1 1 d . . . . .
O10' O 0.7578(4) 0.1748(4) 1.0768(7) 0.104(4) Uani 1 1 d . . . . .
 
loop_
 _atom_site_aniso_label
 _atom_site_aniso_U_11
 _atom_site_aniso_U_22
 _atom_site_aniso_U_33
 _atom_site_aniso_U_23
 _atom_site_aniso_U_13
 _atom_site_aniso_U_12
C1 0.114(14) 0.182(19) 0.112(14) 0.050(13) 0.031(11) 0.106(14)
C2 0.070(10) 0.064(9) 0.110(13) -0.035(9) -0.017(10) 0.028(8)
C3 0.083(10) 0.051(8) 0.064(8) -0.007(6) -0.025(7) 0.020(7)
C5 0.080(10) 0.059(9) 0.056(8) -0.030(7) 0.004(7) -0.006(7)
C6 0.081(11) 0.083(11) 0.083(11) -0.030(9) 0.030(9) -0.012(9)
C7 0.060(11) 0.107(15) 0.122(18) -0.069(13) 0.006(10) 0.003(10)
C8 0.057(11) 0.133(18) 0.150(19) -0.086(16) -0.009(13) 0.009(11)
C9 0.136(12) 0.154(12) 0.168(13) -0.046(10) -0.006(10) 0.070(10)
C10 0.155(13) 0.163(13) 0.165(13) -0.020(10) 0.003(10) 0.085(10)
C11 0.193(15) 0.178(14) 0.192(15) -0.032(11) 0.005(11) 0.094(11)
C12 0.161(14) 0.180(14) 0.178(14) -0.012(11) 0.002(11) 0.077(11)
C13 0.090(15) 0.17(2) 0.19(3) -0.10(2) -0.067(18) 0.075(15)
C14 0.073(9) 0.062(8) 0.044(6) -0.004(6) 0.013(6) 0.026(7)
C15 0.053(7) 0.046(7) 0.053(7) 0.014(6) -0.002(6) 0.005(6)
C16 0.073(9) 0.056(8) 0.073(8) -0.006(7) 0.001(7) 0.023(7)
C17 0.061(9) 0.056(8) 0.082(9) 0.000(7) -0.003(7) 0.000(7)
C18 0.063(9) 0.057(8) 0.151(14) 0.010(9) 0.016(9) 0.027(7)
C19 0.071(10) 0.055(9) 0.084(10) 0.005(7) 0.000(8) 0.015(8)
C20 0.067(9) 0.047(8) 0.049(7) 0.008(6) -0.013(7) -0.015(7)
C21 0.134(13) 0.064(9) 0.056(8) 0.007(8) -0.022(9) 0.016(9)
C22 0.177(18) 0.120(14) 0.054(9) 0.015(9) 0.027(11) 0.009(13)
C23 0.066(10) 0.069(10) 0.082(11) -0.025(9) -0.012(8) 0.016(8)
C24 0.112(14) 0.107(14) 0.182(19) -0.064(14) -0.019(13) 0.056(12)
C2' 0.065(8) 0.068(8) 0.053(7) -0.028(6) -0.023(6) 0.040(7)
C3' 0.068(9) 0.073(9) 0.078(9) -0.029(7) -0.012(8) 0.030(7)
C5' 0.056(8) 0.074(10) 0.064(8) -0.008(7) 0.005(6) 0.016(7)
C6' 0.082(10) 0.058(9) 0.078(9) -0.011(7) -0.011(7) 0.016(7)
C7' 0.057(7) 0.063(8) 0.035(6) -0.004(6) 0.007(6) 0.022(7)
C8' 0.067(9) 0.067(9) 0.062(8) 0.002(7) 0.001(7) 0.024(7)
C9' 0.098(11) 0.072(9) 0.036(7) 0.013(6) 0.019(7) 0.023(8)
C10' 0.073(9) 0.054(8) 0.062(9) 0.004(7) -0.011(7) 0.005(7)
C11' 0.053(8) 0.049(8) 0.059(8) -0.006(6) -0.013(6) 0.006(6)
C12' 0.068(9) 0.058(8) 0.066(8) -0.008(7) -0.003(7) 0.029(7)
C13' 0.067(9) 0.059(8) 0.046(7) 0.000(6) -0.001(6) 0.032(7)
C14' 0.065(9) 0.118(13) 0.084(10) -0.047(10) -0.032(8) 0.053(9)
C15' 0.060(9) 0.080(11) 0.103(11) -0.009(9) 0.017(8) 0.014(8)
C16' 0.055(8) 0.081(9) 0.062(7) -0.002(7) 0.011(6) 0.026(8)
C17' 0.049(8) 0.092(10) 0.093(9) -0.033(8) -0.011(7) 0.032(8)
C18' 0.163(17) 0.071(10) 0.096(12) 0.016(9) 0.059(13) 0.056(11)
C19' 0.097(12) 0.054(9) 0.093(12) 0.003(8) 0.034(10) 0.015(8)
C20' 0.061(9) 0.074(10) 0.088(9) -0.025(8) 0.013(8) 0.018(8)
O50 0.27(2) 0.32(3) 0.208(17) 0.139(18) 0.068(16) 0.19(2)
O51 0.25(2) 0.68(5) 0.216(19) 0.21(3) 0.043(16) 0.32(3)
O52 0.24(2) 0.35(3) 0.24(2) 0.13(2) -0.05(2) 0.03(2)
C21' 0.038(7) 0.046(7) 0.072(8) -0.008(6) 0.004(6) 0.007(6)
C22' 0.103(13) 0.104(13) 0.086(12) 0.012(10) 0.000(10) -0.015(10)
Cl1 0.154(5) 0.198(6) 0.145(5) 0.061(4) 0.067(4) 0.090(5)
Cl2 0.116(4) 0.159(5) 0.104(3) -0.043(3) -0.027(3) 0.047(3)
Cl3 0.120(3) 0.099(3) 0.105(3) -0.018(2) -0.010(3) 0.048(3)
N1 0.112(12) 0.105(11) 0.143(14) -0.021(9) -0.031(10) 0.068(10)
N4 0.118(10) 0.065(8) 0.042(6) -0.002(6) 0.007(6) 0.000(8)
N1' 0.046(6) 0.061(7) 0.056(6) 0.005(5) -0.001(5) 0.022(5)
N4' 0.057(7) 0.076(7) 0.055(6) -0.009(5) 0.006(5) 0.023(6)
O17 0.072(6) 0.059(5) 0.067(5) 0.005(4) -0.011(5) 0.015(5)
O23 0.060(6) 0.052(5) 0.100(7) -0.012(5) -0.023(5) 0.011(5)
O24 0.080(7) 0.102(8) 0.127(8) -0.066(7) -0.005(6) 0.027(6)
O10' 0.097(7) 0.074(7) 0.066(6) 0.011(5) -0.011(5) -0.015(6)
 
_geom_special_details
;
 All esds (except the esd in the dihedral angle between two l.s. planes)
 are estimated using the full covariance matrix.  The cell esds are taken
 into account individually in the estimation of esds in distances, angles
 and torsion angles; correlations between esds in cell parameters are only
 used when they are defined by crystal symmetry.  An approximate (isotropic)
 treatment of cell esds is used for estimating esds involving l.s. planes.
;
 
loop_
 _geom_bond_atom_site_label_1
 _geom_bond_atom_site_label_2
 _geom_bond_distance
 _geom_bond_site_symmetry_2
 _geom_bond_publ_flag
C1 Cl3 1.702(18) . ?
C1 Cl2 1.75(2) . ?
C1 Cl1 1.766(17) . ?
C1 H1A 0.9800 . ?
C2 C7 1.29(2) . ?
C2 N1 1.327(19) . ?
C2 C3 1.50(2) . ?
C3 C11' 1.499(16) . ?
C3 C14 1.596(18) . ?
C3 H3 0.9800 . ?
C5 N4 1.445(19) . ?
C5 C16 1.535(18) . ?
C5 C6 1.57(2) . ?
C5 H5 0.9800 . ?
C6 C7 1.52(3) . ?
C6 H6A 0.9700 . ?
C6 H6B 0.9700 . ?
C7 C8 1.49(3) . ?
C8 C13 1.31(3) . ?
C8 C9 1.36(3) . ?
C9 C10 1.44(3) . ?
C9 H9 0.9300 . ?
C10 C11 1.28(3) . ?
C10 H10 0.9300 . ?
C11 C12 1.31(3) . ?
C11 H11 0.9300 . ?
C12 C13 1.40(3) . ?
C12 H12 0.9300 . ?
C13 N1 1.30(3) . ?
C14 C15 1.514(15) . ?
C14 H14A 0.9700 . ?
C14 H14B 0.9700 . ?
C15 C16 1.496(17) . ?
C15 C20 1.566(19) . ?
C15 H15 0.9800 . ?
C16 C23 1.50(2) . ?
C16 C17 1.576(17) . ?
C17 O17 1.435(14) . ?
C17 H17A 0.9700 . ?
C17 H17B 0.9700 . ?
C18 C19 1.44(2) . ?
C18 H18A 0.9600 . ?
C18 H18B 0.9600 . ?
C18 H18C 0.9600 . ?
C19 C20 1.318(18) . ?
C19 H19 0.9300 . ?
C20 C21 1.502(19) . ?
C21 N4 1.445(18) . ?
C21 H21A 0.9700 . ?
C21 H21B 0.9700 . ?
C22 N4 1.499(18) . ?
C22 H22D 0.9600 . ?
C22 H22E 0.9600 . ?
C22 H22F 0.9600 . ?
C23 O23 1.205(17) . ?
C23 O24 1.348(17) . ?
C24 O24 1.47(2) . ?
C24 H24A 0.9600 . ?
C24 H24B 0.9600 . ?
C24 H24C 0.9600 . ?
C2' C7' 1.355(16) . ?
C2' N1' 1.359(13) . ?
C2' C16' 1.488(16) . ?
C3' N4' 1.472(16) . ?
C3' C14' 1.510(18) . ?
C3' H3'A 0.9700 . ?
C3' H3'B 0.9700 . ?
C5' C6' 1.449(17) . ?
C5' N4' 1.479(15) . ?
C5' H5'A 0.9700 . ?
C5' H5'B 0.9700 . ?
C6' C7' 1.503(17) . ?
C6' H6'A 0.9700 . ?
C6' H6'B 0.9700 . ?
C7' C8' 1.435(16) . ?
C8' C9' 1.390(17) . ?
C8' C13' 1.392(16) . ?
C9' C10' 1.366(17) . ?
C9' H9' 0.9300 . ?
C10' O10' 1.377(14) . ?
C10' C11' 1.438(18) . ?
C11' C12' 1.358(15) . ?
C12' C13' 1.391(16) . ?
C12' H12' 0.9300 . ?
C13' N1' 1.341(13) . ?
C14' C15' 1.53(2) . ?
C14' C17' 1.527(18) . ?
C14' H14' 0.9800 . ?
C15' C20' 1.540(19) . ?
C15' H15A 0.9700 . ?
C15' H15B 0.9700 . ?
C16' C17' 1.549(18) . ?
C16' C21' 1.569(17) . ?
C16' H16' 0.9800 . ?
C17' H17C 0.9700 . ?
C17' H17D 0.9700 . ?
C18' C19' 1.44(2) . ?
C18' H18D 0.9600 . ?
C18' H18E 0.9600 . ?
C18' H18F 0.9600 . ?
C19' C20' 1.558(19) . ?
C19' H19A 0.9700 . ?
C19' H19B 0.9700 . ?
C20' C21' 1.526(16) . ?
C20' H20' 0.9800 . ?
O50 H50A 0.8501 . ?
O50 H50B 0.8501 . ?
O51 H51A 0.8501 . ?
O51 H51B 0.8500 . ?
O52 H52A 0.8500 . ?
O52 H52B 0.8500 . ?
C21' N4' 1.487(14) . ?
C21' H21' 0.9800 . ?
C22' O10' 1.423(17) . ?
C22' H22A 0.9600 . ?
C22' H22B 0.9600 . ?
C22' H22C 0.9600 . ?
N1 H1 0.8600 . ?
N1' H1' 0.8600 . ?
O17 H17 0.8200 . ?
 
loop_
 _geom_angle_atom_site_label_1
 _geom_angle_atom_site_label_2
 _geom_angle_atom_site_label_3
 _geom_angle
 _geom_angle_site_symmetry_1
 _geom_angle_site_symmetry_3
 _geom_angle_publ_flag
Cl3 C1 Cl2 111.4(9) . . ?
Cl3 C1 Cl1 110.7(11) . . ?
Cl2 C1 Cl1 109.5(10) . . ?
Cl3 C1 H1A 108.4 . . ?
Cl2 C1 H1A 108.4 . . ?
Cl1 C1 H1A 108.4 . . ?
C7 C2 N1 111.1(18) . . ?
C7 C2 C3 130.6(18) . . ?
N1 C2 C3 118.1(18) . . ?
C2 C3 C11' 112.2(11) . . ?
C2 C3 C14 117.5(12) . . ?
C11' C3 C14 106.6(10) . . ?
C2 C3 H3 106.6 . . ?
C11' C3 H3 106.6 . . ?
C14 C3 H3 106.6 . . ?
N4 C5 C16 107.8(12) . . ?
N4 C5 C6 114.8(13) . . ?
C16 C5 C6 113.4(12) . . ?
N4 C5 H5 106.8 . . ?
C16 C5 H5 106.8 . . ?
C6 C5 H5 106.8 . . ?
C7 C6 C5 115.1(13) . . ?
C7 C6 H6A 108.5 . . ?
C5 C6 H6A 108.5 . . ?
C7 C6 H6B 108.5 . . ?
C5 C6 H6B 108.5 . . ?
H6A C6 H6B 107.5 . . ?
C2 C7 C8 105(2) . . ?
C2 C7 C6 130.6(19) . . ?
C8 C7 C6 124(2) . . ?
C13 C8 C9 125(3) . . ?
C13 C8 C7 103(2) . . ?
C9 C8 C7 132(3) . . ?
C8 C9 C10 114(3) . . ?
C8 C9 H9 123.1 . . ?
C10 C9 H9 123.1 . . ?
C11 C10 C9 120(3) . . ?
C11 C10 H10 120.1 . . ?
C9 C10 H10 120.1 . . ?
C10 C11 C12 126(3) . . ?
C10 C11 H11 117.0 . . ?
C12 C11 H11 117.0 . . ?
C11 C12 C13 117(3) . . ?
C11 C12 H12 121.7 . . ?
C13 C12 H12 121.7 . . ?
N1 C13 C8 112(2) . . ?
N1 C13 C12 129(3) . . ?
C8 C13 C12 119(3) . . ?
C15 C14 C3 119.7(10) . . ?
C15 C14 H14A 107.4 . . ?
C3 C14 H14A 107.4 . . ?
C15 C14 H14B 107.4 . . ?
C3 C14 H14B 107.4 . . ?
H14A C14 H14B 106.9 . . ?
C16 C15 C14 122.4(11) . . ?
C16 C15 C20 108.7(10) . . ?
C14 C15 C20 104.0(9) . . ?
C16 C15 H15 107.0 . . ?
C14 C15 H15 107.0 . . ?
C20 C15 H15 107.0 . . ?
C15 C16 C23 114.4(11) . . ?
C15 C16 C5 112.0(10) . . ?
C23 C16 C5 114.5(13) . . ?
C15 C16 C17 108.4(11) . . ?
C23 C16 C17 100.2(10) . . ?
C5 C16 C17 106.2(10) . . ?
O17 C17 C16 107.7(10) . . ?
O17 C17 H17A 110.2 . . ?
C16 C17 H17A 110.2 . . ?
O17 C17 H17B 110.2 . . ?
C16 C17 H17B 110.2 . . ?
H17A C17 H17B 108.5 . . ?
C19 C18 H18A 109.5 . . ?
C19 C18 H18B 109.5 . . ?
H18A C18 H18B 109.5 . . ?
C19 C18 H18C 109.5 . . ?
H18A C18 H18C 109.5 . . ?
H18B C18 H18C 109.5 . . ?
C20 C19 C18 127.1(13) . . ?
C20 C19 H19 116.4 . . ?
C18 C19 H19 116.4 . . ?
C19 C20 C21 122.0(14) . . ?
C19 C20 C15 126.2(11) . . ?
C21 C20 C15 111.5(14) . . ?
N4 C21 C20 115.0(12) . . ?
N4 C21 H21A 108.5 . . ?
C20 C21 H21A 108.5 . . ?
N4 C21 H21B 108.5 . . ?
C20 C21 H21B 108.5 . . ?
H21A C21 H21B 107.5 . . ?
N4 C22 H22D 109.5 . . ?
N4 C22 H22E 109.5 . . ?
H22D C22 H22E 109.5 . . ?
N4 C22 H22F 109.5 . . ?
H22D C22 H22F 109.5 . . ?
H22E C22 H22F 109.5 . . ?
O23 C23 O24 123.2(16) . . ?
O23 C23 C16 126.1(14) . . ?
O24 C23 C16 110.6(15) . . ?
O24 C24 H24A 109.5 . . ?
O24 C24 H24B 109.5 . . ?
H24A C24 H24B 109.5 . . ?
O24 C24 H24C 109.5 . . ?
H24A C24 H24C 109.5 . . ?
H24B C24 H24C 109.5 . . ?
C7' C2' N1' 109.9(10) . . ?
C7' C2' C16' 129.3(10) . . ?
N1' C2' C16' 120.8(11) . . ?
N4' C3' C14' 110.5(10) . . ?
N4' C3' H3'A 109.6 . . ?
C14' C3' H3'A 109.6 . . ?
N4' C3' H3'B 109.6 . . ?
C14' C3' H3'B 109.6 . . ?
H3'A C3' H3'B 108.1 . . ?
C6' C5' N4' 121.5(11) . . ?
C6' C5' H5'A 107.0 . . ?
N4' C5' H5'A 107.0 . . ?
C6' C5' H5'B 107.0 . . ?
N4' C5' H5'B 107.0 . . ?
H5'A C5' H5'B 106.7 . . ?
C5' C6' C7' 114.0(11) . . ?
C5' C6' H6'A 108.8 . . ?
C7' C6' H6'A 108.7 . . ?
C5' C6' H6'B 108.8 . . ?
C7' C6' H6'B 108.7 . . ?
H6'A C6' H6'B 107.6 . . ?
C2' C7' C8' 106.6(9) . . ?
C2' C7' C6' 127.0(11) . . ?
C8' C7' C6' 126.2(11) . . ?
C9' C8' C13' 121.2(12) . . ?
C9' C8' C7' 133.3(11) . . ?
C13' C8' C7' 105.5(11) . . ?
C10' C9' C8' 118.9(11) . . ?
C10' C9' H9' 120.6 . . ?
C8' C9' H9' 120.6 . . ?
C9' C10' O10' 123.4(12) . . ?
C9' C10' C11' 121.0(11) . . ?
O10' C10' C11' 115.6(11) . . ?
C12' C11' C10' 118.1(11) . . ?
C12' C11' C3 121.3(11) . . ?
C10' C11' C3 120.3(11) . . ?
C11' C12' C13' 121.8(12) . . ?
C11' C12' H12' 119.1 . . ?
C13' C12' H12' 119.1 . . ?
N1' C13' C8' 109.3(10) . . ?
N1' C13' C12' 131.7(11) . . ?
C8' C13' C12' 118.8(12) . . ?
C3' C14' C15' 108.0(11) . . ?
C3' C14' C17' 109.0(11) . . ?
C15' C14' C17' 110.1(13) . . ?
C3' C14' H14' 109.9 . . ?
C15' C14' H14' 109.9 . . ?
C17' C14' H14' 109.9 . . ?
C14' C15' C20' 110.2(11) . . ?
C14' C15' H15A 109.6 . . ?
C20' C15' H15A 109.6 . . ?
C14' C15' H15B 109.6 . . ?
C20' C15' H15B 109.6 . . ?
H15A C15' H15B 108.1 . . ?
C2' C16' C17' 117.4(11) . . ?
C2' C16' C21' 109.8(9) . . ?
C17' C16' C21' 107.0(9) . . ?
C2' C16' H16' 107.4 . . ?
C17' C16' H16' 107.4 . . ?
C21' C16' H16' 107.4 . . ?
C14' C17' C16' 110.1(11) . . ?
C14' C17' H17C 109.6 . . ?
C16' C17' H17C 109.6 . . ?
C14' C17' H17D 109.6 . . ?
C16' C17' H17D 109.6 . . ?
H17C C17' H17D 108.2 . . ?
C19' C18' H18D 109.5 . . ?
C19' C18' H18E 109.5 . . ?
H18D C18' H18E 109.5 . . ?
C19' C18' H18F 109.5 . . ?
H18D C18' H18F 109.5 . . ?
H18E C18' H18F 109.5 . . ?
C18' C19' C20' 114.7(13) . . ?
C18' C19' H19A 108.6 . . ?
C20' C19' H19A 108.6 . . ?
C18' C19' H19B 108.6 . . ?
C20' C19' H19B 108.6 . . ?
H19A C19' H19B 107.6 . . ?
C21' C20' C15' 107.9(12) . . ?
C21' C20' C19' 115.6(11) . . ?
C15' C20' C19' 112.1(12) . . ?
C21' C20' H20' 106.9 . . ?
C15' C20' H20' 106.9 . . ?
C19' C20' H20' 106.9 . . ?
H50A O50 H50B 109.5 . . ?
H51A O51 H51B 109.5 . . ?
H52A O52 H52B 109.5 . . ?
N4' C21' C20' 109.8(9) . . ?
N4' C21' C16' 112.0(10) . . ?
C20' C21' C16' 107.4(9) . . ?
N4' C21' H21' 109.2 . . ?
C20' C21' H21' 109.2 . . ?
C16' C21' H21' 109.2 . . ?
O10' C22' H22A 109.5 . . ?
O10' C22' H22B 109.5 . . ?
H22A C22' H22B 109.5 . . ?
O10' C22' H22C 109.5 . . ?
H22A C22' H22C 109.5 . . ?
H22B C22' H22C 109.5 . . ?
C13 N1 C2 108(2) . . ?
C13 N1 H1 126.0 . . ?
C2 N1 H1 126.0 . . ?
C21 N4 C5 113.1(11) . . ?
C21 N4 C22 110.0(13) . . ?
C5 N4 C22 112.8(15) . . ?
C13' N1' C2' 108.7(10) . . ?
C13' N1' H1' 125.7 . . ?
C2' N1' H1' 125.7 . . ?
C3' N4' C5' 112.8(10) . . ?
C3' N4' C21' 111.2(9) . . ?
C5' N4' C21' 116.4(9) . . ?
C17 O17 H17 109.5 . . ?
C23 O24 C24 115.5(14) . . ?
C10' O10' C22' 116.9(10) . . ?
 
_refine_diff_density_max    0.387
_refine_diff_density_min   -0.288
_refine_diff_density_rms    0.065

_shelxl_version_number 2014/6

_shelx_res_file
;
TITL exp_4715
CELL 0.71073 25.986793 25.986793 12.778898 90 90 120
ZERR 6 0.00269 0.00269 0.001177 0 0 0
LATT -1
SYMM -Y+X,+X,0.833+Z
SYMM -Y,+X-Y,0.667+Z
SYMM -X,-Y,0.5+Z
SYMM +Y-X,-X,0.333+Z
SYMM +Y,-X+Y,0.167+Z
SFAC C  H  N  O  Cl
UNIT 258  354  24  42  18
OMIT -2 50.01
REM <HKL>C:\frames\guest\KH_4715\work\exp_4715.hkl</HKL>
L.S. 20
ACTA 50
BOND $H
FMAP 2
PLAN 13
FREE C11  C9
FLAT C8 > C13
ISOR 0.01 C9
ISOR 0.01 C10
ISOR 0.01 C11
ISOR 0.01 C12
WGHT    0.100000
FVAR       0.36703
C1    1    0.785404    0.360549    0.021765    11.00000    0.11416    0.18176 =
         0.11153    0.04951    0.03104    0.10646
AFIX  13
H1A   2    0.815897    0.348997    0.027010    11.00000   -1.20000
AFIX   0
C2    1    0.838219    0.171514    0.805270    11.00000    0.07032    0.06361 =
         0.10966   -0.03533   -0.01717    0.02787
C3    1    0.799929    0.186427    0.872222    11.00000    0.08322    0.05067 =
         0.06373   -0.00692   -0.02474    0.02038
AFIX  13
H3    2    0.771994    0.149826    0.908861    11.00000   -1.20000
AFIX   0
C5    1    0.770080    0.173873    0.576510    11.00000    0.07951    0.05916 =
         0.05625   -0.03006    0.00379   -0.00641
AFIX  13
H5    2    0.772248    0.147431    0.524228    11.00000   -1.20000
AFIX   0
C6    1    0.833856    0.211384    0.624476    11.00000    0.08144    0.08341 =
         0.08335   -0.02969    0.03027   -0.01164
AFIX  23
H6A   2    0.862658    0.223984    0.568125    11.00000   -1.20000
H6B   2    0.837161    0.246873    0.655994    11.00000   -1.20000
AFIX   0
C7    1    0.850057    0.179439    0.706221    11.00000    0.06021    0.10658 =
         0.12171   -0.06888    0.00571    0.00277
C8    1    0.888164    0.152774    0.685184    11.00000    0.05749    0.13345 =
         0.14999   -0.08614   -0.00860    0.00882
C9    1    0.912404    0.145903    0.595288    11.00000    0.13576    0.15399 =
         0.16770   -0.04569   -0.00617    0.06967
AFIX  43
H9    2    0.908915    0.160522    0.530858    11.00000   -1.20000
AFIX   0
C10   1    0.943873    0.113933    0.609396    11.00000    0.15506    0.16269 =
         0.16468   -0.02039    0.00349    0.08494
AFIX  43
H10   2    0.962406    0.107486    0.552738    11.00000   -1.20000
AFIX   0
C11   1    0.946283    0.094405    0.700104    11.00000    0.19335    0.17791 =
         0.19235   -0.03217    0.00459    0.09372
AFIX  43
H11   2    0.967086    0.074007    0.705691    11.00000   -1.20000
AFIX   0
C12   1    0.922199    0.100456    0.785788    11.00000    0.16093    0.17993 =
         0.17818   -0.01175    0.00208    0.07718
AFIX  43
H12   2    0.926126    0.085570    0.849620    11.00000   -1.20000
AFIX   0
C13   1    0.890129    0.130561    0.776461    11.00000    0.08966    0.16721 =
         0.19411   -0.09886   -0.06741    0.07453
C14   1    0.760986    0.209721    0.814508    11.00000    0.07268    0.06155 =
         0.04397   -0.00442    0.01259    0.02580
AFIX  23
H14A  2    0.742178    0.221038    0.868260    11.00000   -1.20000
H14B  2    0.788166    0.245691    0.777101    11.00000   -1.20000
AFIX   0
C15   1    0.713010    0.169549    0.738224    11.00000    0.05291    0.04584 =
         0.05258    0.01425   -0.00243    0.00473
AFIX  13
H15   2    0.678707    0.141477    0.779918    11.00000   -1.20000
AFIX   0
C16   1    0.722974    0.134029    0.656864    11.00000    0.07251    0.05608 =
         0.07313   -0.00554    0.00115    0.02279
C17   1    0.663437    0.096695    0.593765    11.00000    0.06092    0.05621 =
         0.08221   -0.00008   -0.00322    0.00010
AFIX  23
H17A  2    0.648788    0.122317    0.569120    11.00000   -1.20000
H17B  2    0.670224    0.078075    0.533641    11.00000   -1.20000
AFIX   0
C18   1    0.614300    0.198303    0.801303    11.00000    0.06268    0.05660 =
         0.15053    0.00972    0.01577    0.02661
AFIX 137
H18A  2    0.614513    0.163262    0.824426    11.00000   -1.50000
H18B  2    0.574692    0.188090    0.781363    11.00000   -1.50000
H18C  2    0.627620    0.226843    0.857102    11.00000   -1.50000
AFIX   0
C19   1    0.653436    0.223392    0.712773    11.00000    0.07062    0.05463 =
         0.08366    0.00483    0.00030    0.01459
AFIX  43
H19   2    0.648792    0.250702    0.672794    11.00000   -1.20000
AFIX   0
C20   1    0.695091    0.211893    0.682226    11.00000    0.06742    0.04656 =
         0.04897    0.00808   -0.01338   -0.01452
C21   1    0.736326    0.244673    0.593148    11.00000    0.13380    0.06364 =
         0.05555    0.00670   -0.02161    0.01561
AFIX  23
H21A  2    0.719392    0.264234    0.552853    11.00000   -1.20000
H21B  2    0.773757    0.275362    0.621842    11.00000   -1.20000
AFIX   0
C22   1    0.788379    0.245487    0.436359    11.00000    0.17690    0.11959 =
         0.05446    0.01513    0.02664    0.00908
AFIX 137
H22D  2    0.770311    0.264672    0.399780    11.00000   -1.50000
H22E  2    0.794755    0.220670    0.388674    11.00000   -1.50000
H22F  2    0.825774    0.275009    0.465030    11.00000   -1.50000
AFIX   0
C23   1    0.731152    0.084913    0.699784    11.00000    0.06594    0.06871 =
         0.08175   -0.02505   -0.01198    0.01622
C24   1    0.760841    0.013978    0.657954    11.00000    0.11194    0.10690 =
         0.18217   -0.06418   -0.01906    0.05559
AFIX 137
H24A  2    0.784757    0.024901    0.720124    11.00000   -1.50000
H24B  2    0.780419    0.005105    0.603050    11.00000   -1.50000
H24C  2    0.722892   -0.020408    0.671912    11.00000   -1.50000
AFIX   0
C2'   1    0.979017    0.405409    1.093793    11.00000    0.06480    0.06839 =
         0.05298   -0.02811   -0.02326    0.03989
C3'   1    1.039403    0.506861    1.327857    11.00000    0.06814    0.07259 =
         0.07766   -0.02871   -0.01193    0.03033
AFIX  23
H3'A  2    1.025623    0.470309    1.367028    11.00000   -1.20000
H3'B  2    1.048777    0.538675    1.377317    11.00000   -1.20000
AFIX   0
C5'   1    0.934180    0.447292    1.278335    11.00000    0.05619    0.07448 =
         0.06396   -0.00750    0.00465    0.01605
AFIX  23
H5'A  2    0.923057    0.451366    1.349005    11.00000   -1.20000
H5'B  2    0.905398    0.448732    1.231902    11.00000   -1.20000
AFIX   0
C6'   1    0.926155    0.388097    1.270013    11.00000    0.08245    0.05827 =
         0.07770   -0.01141   -0.01099    0.01597
AFIX  23
H6'A  2    0.886444    0.359584    1.293694    11.00000   -1.20000
H6'B  2    0.954161    0.385228    1.316403    11.00000   -1.20000
AFIX   0
C7'   1    0.934562    0.371572    1.161247    11.00000    0.05653    0.06314 =
         0.03482   -0.00360    0.00715    0.02209
C8'   1    0.893660    0.318975    1.105129    11.00000    0.06672    0.06708 =
         0.06159    0.00232    0.00119    0.02449
C9'   1    0.840007    0.269093    1.131702    11.00000    0.09819    0.07185 =
         0.03567    0.01340    0.01879    0.02306
AFIX  43
H9'   2    0.823900    0.265451    1.198119    11.00000   -1.20000
AFIX   0
C10'  1    0.811348    0.225527    1.058647    11.00000    0.07271    0.05417 =
         0.06244    0.00393   -0.01145    0.00481
C11'  1    0.835137    0.231343    0.954912    11.00000    0.05347    0.04898 =
         0.05925   -0.00580   -0.01268    0.00633
C12'  1    0.887566    0.280870    0.932162    11.00000    0.06799    0.05751 =
         0.06573   -0.00767   -0.00257    0.02892
AFIX  43
H12'  2    0.903059    0.285616    0.864971    11.00000   -1.20000
AFIX   0
C13'  1    0.918738    0.324692    1.006525    11.00000    0.06699    0.05860 =
         0.04564    0.00006   -0.00111    0.03188
C14'  1    1.094496    0.520231    1.266918    11.00000    0.06534    0.11757 =
         0.08404   -0.04693   -0.03234    0.05290
AFIX  13
H14'  2    1.125752    0.524383    1.314945    11.00000   -1.20000
AFIX   0
C15'  1    1.115254    0.578494    1.207048    11.00000    0.05979    0.07975 =
         0.10286   -0.00918    0.01707    0.01366
AFIX  23
H15A  2    1.150631    0.588019    1.166991    11.00000   -1.20000
H15B  2    1.125196    0.610556    1.256243    11.00000   -1.20000
AFIX   0
C16'  1    1.032276    0.464965    1.110294    11.00000    0.05477    0.08146 =
         0.06164   -0.00231    0.01097    0.02591
AFIX  13
H16'  2    1.052270    0.478548    1.042558    11.00000   -1.20000
AFIX   0
C17'  1    1.079195    0.469497    1.190203    11.00000    0.04933    0.09224 =
         0.09268   -0.03304   -0.01100    0.03189
AFIX  23
H17C  2    1.063732    0.432380    1.228273    11.00000   -1.20000
H17D  2    1.114803    0.476514    1.153485    11.00000   -1.20000
AFIX   0
C18'  1    1.019485    0.630721    1.062326    11.00000    0.16271    0.07146 =
         0.09577    0.01641    0.05929    0.05556
AFIX 137
H18D  2    1.041741    0.639334    0.998443    11.00000   -1.50000
H18E  2    1.012020    0.662542    1.077920    11.00000   -1.50000
H18F  2    0.982377    0.594350    1.054577    11.00000   -1.50000
AFIX   0
C19'  1    1.052932    0.624629    1.146312    11.00000    0.09728    0.05415 =
         0.09347    0.00259    0.03355    0.01549
AFIX  23
H19A  2    1.031242    0.618747    1.211126    11.00000   -1.20000
H19B  2    1.090463    0.661476    1.152717    11.00000   -1.20000
AFIX   0
C20'  1    1.065916    0.572595    1.132780    11.00000    0.06128    0.07375 =
         0.08849   -0.02501    0.01279    0.01780
AFIX  13
H20'  2    1.080618    0.575145    1.061256    11.00000   -1.20000
AFIX   6
O50   4    0.744528    0.038976    0.043852    11.00000    0.26551    0.32446 =
         0.20806    0.13868    0.06807    0.18810
H50A  2    0.734248    0.046569    0.102393    11.00000   -1.50000
H50B  2    0.718920    0.004063    0.024607    11.00000   -1.50000
O51   4    0.927972    0.231874    0.297740    11.00000    0.25440    0.67650 =
         0.21635    0.21490    0.04302    0.32212
H51A  2    0.942290    0.217867    0.253731    11.00000   -1.50000
H51B  2    0.894202    0.225319    0.276625    11.00000   -1.50000
O52   4    0.967811    0.201271    0.113305    11.00000    0.23896    0.34884 =
         0.24255    0.12722   -0.05356    0.03188
H52A  2    0.936327    0.178001    0.146707    11.00000   -1.50000
H52B  2    0.960998    0.196473    0.047941    11.00000   -1.50000
AFIX   0
C21'  1    1.012526    0.510265    1.145903    11.00000    0.03822    0.04606 =
         0.07187   -0.00764    0.00395    0.00716
AFIX  13
H21'  2    0.980172    0.506008    1.100659    11.00000   -1.20000
AFIX   0
C22'  1    0.736006    0.164821    1.181339    11.00000    0.10330    0.10385 =
         0.08619    0.01170    0.00023   -0.01493
AFIX 137
H22A  2    0.768121    0.174352    1.228969    11.00000   -1.50000
H22B  2    0.706099    0.123844    1.189641    11.00000   -1.50000
H22C  2    0.719124    0.189538    1.195935    11.00000   -1.50000
AFIX   0
CL1   5    0.728350    0.317779    0.112101    11.00000    0.15442    0.19789 =
         0.14513    0.06089    0.06662    0.09023
CL2   5    0.817777    0.435734    0.053993    11.00000    0.11585    0.15903 =
         0.10354   -0.04320   -0.02675    0.04671
CL3   5    0.758535    0.347374   -0.102726    11.00000    0.12031    0.09883 =
         0.10456   -0.01762   -0.00954    0.04835
N1    3    0.861832    0.141707    0.848786    11.00000    0.11186    0.10523 =
         0.14284   -0.02136   -0.03073    0.06834
AFIX  43
H1    2    0.858931    0.131537    0.913505    11.00000   -1.20000
AFIX   0
N4    3    0.748248    0.208190    0.523161    11.00000    0.11812    0.06460 =
         0.04248   -0.00195    0.00719    0.00040
N1'   3    0.969722    0.376729    1.000772    11.00000    0.04564    0.06055 =
         0.05586    0.00549   -0.00110    0.02221
AFIX  43
H1'   2    0.992723    0.389787    0.947123    11.00000   -1.20000
AFIX   0
N4'   3    0.992172    0.500811    1.256577    11.00000    0.05748    0.07564 =
         0.05500   -0.00854    0.00638    0.02341
O17   4    0.620981    0.052247    0.662953    11.00000    0.07162    0.05901 =
         0.06687    0.00494   -0.01144    0.01469
AFIX 147
H17   2    0.587586    0.038277    0.637893    11.00000   -1.50000
AFIX   0
O23   4    0.719733    0.065381    0.787525    11.00000    0.05967    0.05212 =
         0.10006   -0.01151   -0.02267    0.01129
O24   4    0.752328    0.063607    0.625382    11.00000    0.07965    0.10198 =
         0.12665   -0.06634   -0.00491    0.02715
O10'  4    0.757758    0.174795    1.076790    11.00000    0.09676    0.07418 =
         0.06579    0.01121   -0.01064   -0.01461
HKLF 4

REM  exp_4715
REM R1 =  0.1011 for    3366 Fo > 4sig(Fo)  and  0.1952 for all    6910 data
REM    517 parameters refined using     28 restraints

END

WGHT      0.1590      2.9246

REM Highest difference peak  0.387,  deepest hole -0.288,  1-sigma level  0.065
Q1    1   0.7180 -0.0253  0.0301  11.00000  0.05    0.39
Q2    1   0.6971 -0.0072  0.1266  11.00000  0.05    0.36
Q3    1   0.8125  0.0586  0.0739  11.00000  0.05    0.34
Q4    1   1.0354  0.0606  0.3593  11.00000  0.05    0.33
Q5    1   0.8611  0.0721  0.2600  11.00000  0.05    0.24
Q6    1   0.9328  0.4082  1.1075  11.00000  0.05    0.23
Q7    1   0.8091  0.0497  0.2685  11.00000  0.05    0.22
Q8    1   1.0377  0.0982  0.3743  11.00000  0.05    0.22
Q9    1   0.7097  0.2770  0.0499  11.00000  0.05    0.21
Q10   1   0.9273  0.1352  0.7196  11.00000  0.05    0.19
Q11   1   0.8241  0.3057  0.0267  11.00000  0.05    0.19
Q12   1   0.7512  0.2701  0.4229  11.00000  0.05    0.19
Q13   1   1.0769  0.6120  1.1978  11.00000  0.05    0.18
;
_shelx_res_checksum   55226

_shelx_hkl_file
;
   0   0  -8   -8.55   10.87
   0   0   2    5.89    4.23
   0   0   3   -3.75    3.17
   0   0   4    4.70    6.74
   0   0   5   -7.37   10.08
   0   0   6  799.76   50.11
   0   0   7   -5.52   10.73
   0   0   8  -14.33   11.66
   0   0   9  -10.81   10.28
   0   0  10    8.48   11.58
   0   0  11  -22.34   17.85
   0   0  12   17.52   10.98
   0   0  13  -14.75   16.10
   0   0  14   29.86   20.25
   0   0  15  -11.29   16.60
   0   0  16   -7.63   11.04
   0   1  -9   35.50   12.42
   1   0  -8    8.30    7.07
   0   1  -8   19.01    8.70
  -1   1  -8   16.04    9.36
  -1   0   2 5535.83   73.50
   1  -1   2 5488.23   75.61
   0  -1   2 5340.87   70.12
  -1   1   2 5355.40   75.73
   1   0   2 5406.18   78.49
   1  -1   3  848.57   37.07
   0  -1   3  826.64   34.73
   0   1   3  795.25   36.49
   1   0   3  816.91   37.32
  -1   0   3  801.42   34.44
  -1   1   3  841.18   36.58
  -1   0   4 1497.27   54.62
  -1   1   4 1496.11   56.56
   1   0   4 1548.98   58.15
   0   1   4 1465.95   57.49
   0  -1   4 1483.78   54.33
   1  -1   4 1515.55   56.55
  -1   1   5  120.73   18.11
   1   0   5  105.05   16.00
   0   1   5  116.83   16.76
   1  -1   5  109.23   17.07
  -1   0   5  112.97   17.26
   0  -1   5  103.55   16.50
   1  -1   6   71.06   14.00
  -1   0   6   85.57   16.42
  -1   1   6   76.64   14.79
   0  -1   6   71.99   15.23
   0   1   6   85.84   14.95
   1   0   6   60.71   14.28
  -1   1   7  120.38   21.79
   1  -1   7  109.17   19.62
   0  -1   7  104.05   18.55
   1   0   7  114.73   20.50
   0   1   7  100.27   20.09
  -1   0   7  115.24   19.80
   0   1   8    8.59    5.59
   1   0   8   11.04    7.84
  -1   0   8   24.20   11.62
   0  -1   8   -3.05    9.99
   1  -1   8    6.24    6.31
  -1   1   8   16.24   10.47
   0   1   9   29.42   11.81
  -1   1   9   34.88   11.44
   0  -1   9   32.45   13.88
  -1   0   9   31.16   12.88
   1   0   9   26.13    9.80
   1  -1   9   42.43   14.65
   0   1  10    0.83    7.24
   1  -1  10   -6.40   11.58
  -1   0  10   -4.37    9.27
   1   0  10   -3.09   12.46
  -1   1  10  -16.49   14.21
   0  -1  10   11.31    7.95
   1   0  11  -12.62   18.34
   0   1  11   -8.19   14.07
  -1   1  11  -18.40   15.21
   0  -1  11  -29.52   19.69
  -1   0  11   -8.00   12.97
   1  -1  11   -0.17   11.30
  -1   0  12  -19.76   17.57
   0   1  12   -2.45   10.17
   1   0  12   -1.76    8.87
  -1   1  12    3.92   10.39
   0  -1  12   24.20   15.51
   1  -1  12   -1.76   11.62
   1   0  13   -1.62   11.15
  -1   0  13  -18.95   13.16
   0  -1  13  -37.88   20.81
   1  -1  13    2.36    8.06
   0   1  13  -10.07   14.47
  -1   1  13   -5.61    9.46
  -1   0  14   22.90   13.91
   1   0  14   29.40   16.72
  -1   1  14   27.61   20.12
   1  -1  14   23.64   20.37
   0  -1  14   21.95   16.86
   0   1  14   33.54   23.86
   1  -1  15   -3.62   12.17
   0   1  15   22.22   18.51
   1   0  15    8.43    8.40
  -1   0  15    2.53   15.07
  -1   1  15   20.82   21.32
   0  -1  15    5.59   11.50
  -1   1  16   22.46   19.06
   0   1  16   11.53   13.72
  -1   0  16    9.75   14.16
   0  -1  16   25.85   22.33
  -1   0  17   -8.49   10.86
  -1   1  17  -22.18   22.80
  -1   2  -9   23.21    9.38
   1   1  -9    9.46    8.25
   1   1  -8  215.80   28.91
   2  -1  -8  229.07   30.54
  -2   1  -8  243.87   32.38
  -1   2  -8  220.53   30.23
  -1  -1   2 1484.42   36.27
  -2   1   2 1592.32   41.65
   1  -2   2 1413.85   36.98
  -1   2   3  438.35   27.15
  -1  -1   3  467.54   25.59
   2  -1   3  497.24   29.72
   1  -2   3  485.50   27.31
  -2   1   3  499.18   27.88
   1   1   3  471.97   29.28
   1   1   4  273.36   26.17
   1  -2   4  256.52   22.39
  -1   2   4  280.50   25.00
  -2   1   4  231.45   18.83
   2  -1   4  237.48   22.19
  -1  -1   4  263.96   22.27
   2  -1   5  319.96   29.84
   1   1   5  318.05   29.49
  -1   2   5  287.12   27.72
   1  -2   5  299.26   27.62
  -2   1   5  313.16   28.66
  -1  -1   5  307.42   27.50
  -2   1   6  842.77   51.77
  -1  -1   6  827.41   50.04
   2  -1   6  886.52   54.97
  -1   2   6  812.58   51.35
   1   1   6  858.27   55.39
   1  -2   6  906.72   53.85
  -1  -1   7   24.80   11.49
  -2   1   7   43.31   15.73
   1   1   7   26.23   11.08
  -1   2   7   24.25    8.84
   2  -1   7   37.11   15.48
   1  -2   7   19.66    6.20
  -1   2   8  207.71   30.31
   1   1   8  217.39   32.00
   2  -1   8  212.45   30.32
  -2   1   8  210.26   30.25
   1  -2   8  195.44   28.89
  -1  -1   8  205.54   28.74
  -1  -1   9   26.49   11.31
   1  -2   9    8.36    6.72
   1   1   9    4.84    6.54
  -1   2   9   13.93   11.49
   2  -1   9   23.08   13.54
  -2   1   9   24.80   13.74
  -1   2  10   12.73    7.29
   1   1  10    5.80    9.10
  -1  -1  10   25.39    7.60
   1  -2  10    5.90    7.09
   2  -1  10   13.73    8.54
  -2   1  10    8.66    8.46
  -1   2  11   -1.66    9.69
  -2   1  11   -0.01   11.00
   1  -2  11    2.44    7.17
   2  -1  11    7.61    9.72
  -1  -1  11    2.31    9.54
   1   1  11   12.43   11.86
  -1  -1  12   11.94   13.59
   1   1  12   -1.19   10.59
   1  -2  12  -18.25   14.67
   2  -1  12   11.63   11.83
  -1   2  12  -12.19   11.67
  -2   1  12   17.85   13.23
  -1  -1  13   -2.13   14.92
   1  -2  13   15.94   10.28
  -2   1  13    5.19   13.63
   1   1  13   -1.78   10.48
   2  -1  13   25.46   16.41
  -1   2  13   14.83   11.37
   1   1  14   13.54   17.53
   1  -2  14   47.02   23.33
  -1  -1  14   30.22   18.37
  -1   2  14   52.79   25.67
  -2   1  14    7.57   10.47
   1   1  15   -7.62    8.92
  -1   2  15    9.27   13.51
  -2   1  15   28.98   18.68
  -1  -1  15   13.23   16.85
  -2   1  16   39.70   25.75
  -1   2  16   20.08   16.77
  -1  -1  16   34.09   23.39
  -2   1  17    9.05   14.13
   0   2  -9  113.64   23.27
   0   2  -8   18.84    8.97
   2   0  -8   23.59    9.65
  -2   2  -8   44.49   15.44
   0   2  -6  272.59   28.25
  -2   2   2 2253.68   51.50
   0  -2   2 2274.26   43.68
  -2   0   2 2244.16   45.77
   2  -2   3  245.72   20.28
   2   0   3  287.20   23.92
  -2   2   3  273.39   21.22
   0  -2   3  271.08   20.09
  -2   0   3  294.86   21.26
   0   2   3  284.22   22.95
  -2   2   4  438.65   29.42
   2  -2   4  448.16   30.50
   2   0   4  499.25   34.78
  -2   0   4  425.96   27.50
   0  -2   4  458.08   29.83
   0   2   4  483.85   33.24
   0  -2   5  496.39   34.56
   2   0   5  512.77   38.83
   0   2   5  465.79   35.96
   2  -2   5  519.27   37.95
  -2   0   5  506.54   35.25
  -2   2   5  473.64   35.17
   2   0   6  258.82   30.46
   2  -2   6  271.89   29.74
  -2   2   6  260.40   30.03
  -2   0   6  258.95   27.47
   0   2   6  289.85   31.70
   0  -2   6  248.53   26.98
  -2   2   7  213.74   28.76
   0   2   7  195.93   28.47
   2  -2   7  208.10   28.47
   2   0   7  195.61   27.60
   0  -2   7  196.75   26.78
  -2   0   7  206.11   27.31
   0   2   8   13.39    6.36
   2   0   8   26.34    9.96
   0  -2   8   25.59    7.92
  -2   0   8   38.89   12.70
  -2   2   8   36.37   14.53
   2  -2   8   28.43   11.65
   2  -2   9   94.10   20.42
   2   0   9   87.27   22.78
  -2   0   9  101.82   22.45
   0   2   9  106.15   24.42
  -2   2   9   84.99   21.23
   0  -2   9   83.00   21.02
   2   0  10   30.81   16.22
  -2   2  10   28.26   10.76
  -2   0  10   27.46   10.95
   2  -2  10   28.17   10.08
   0  -2  10   28.06   14.83
   0   2  10   20.42   12.63
   0   2  11   51.59   18.61
  -2   2  11   80.89   25.35
   0  -2  11   47.91   16.63
   2  -2  11   41.62   17.28
  -2   0  11   75.22   22.82
   2   0  11   55.71   21.05
   0   2  12   22.71   13.40
   0  -2  12   40.33   18.47
  -2   0  12   29.02   13.81
  -2   2  12   14.65    8.98
   2   0  12    2.52   14.97
   2  -2  12   28.50   15.37
  -2   2  13   -4.63    8.75
   0  -2  13   10.63   11.49
   2   0  13    0.78   10.27
   0   2  13   -2.52   12.91
   2  -2  13    4.31   13.09
  -2   0  13    4.62   10.08
   0   2  14   39.13   23.35
  -2   2  14   18.69   15.25
   0  -2  14   17.51   15.98
   2   0  14   16.37   15.21
  -2   0  14   27.34   18.32
  -2   0  15   16.52    9.36
  -2   2  15   -4.07   10.85
   0  -2  15    0.25   14.51
   0   2  15    2.17   11.61
  -2   0  16    6.53   12.92
  -2   2  16  -12.27   13.61
   0   2  16  -11.87   11.78
  -2   0  17  -10.24   17.42
  -1   3  -9   59.08   16.18
   2   1  -9   69.89   18.13
   2   1  -8   24.49   11.33
  -1   3  -8   20.76   10.82
  -3   2  -8   40.69   13.52
   2   1  -6  212.83   24.66
  -1   3  -6  261.56   28.33
  -1   3  -5  185.94   21.30
  -1   3   2 1595.97   43.09
   1  -3   2 1718.57   38.41
  -3   2   2 1686.32   44.29
  -2  -1   2 1654.73   37.34
   2   1   3  171.71   18.66
   1  -3   3  171.38   16.15
  -3   2   3  170.44   17.65
  -2  -1   3  173.90   15.72
  -1   3   3  151.93   16.51
   2   1   4  340.81   29.52
   1  -3   4  322.90   24.97
  -1   3   4  324.28   27.48
  -3   2   4  355.86   27.45
  -2  -1   4  333.51   24.64
   1  -3   5  181.04   21.83
  -3   2   5  206.83   24.17
  -2  -1   5  189.20   21.01
   2   1   5  184.76   23.69
  -1   3   5  162.90   20.41
   3  -2   5  189.32   23.45
   2   1   6  178.25   24.88
   3  -2   6  227.87   28.47
  -3   2   6  224.47   27.02
  -1   3   6  216.12   28.37
   1  -3   6  248.21   28.76
  -2  -1   6  198.43   23.77
   1  -3   7   -8.10   10.35
   2   1   7   15.38    5.32
   3  -2   7    1.82    4.86
  -2  -1   7    5.16    5.30
  -1   3   7   12.39    8.95
  -3   2   7    0.46    5.74
  -2  -1   8   11.67    8.86
  -1   3   8   21.18   11.60
   2   1   8   17.29    7.51
   1  -3   8    6.64    6.86
  -3   2   8    8.25    7.57
   3  -2   8   35.21   14.32
  -2  -1   9   78.75   18.99
   2   1   9   28.54    8.64
   3  -2   9   69.82   20.03
  -1   3   9   90.70   22.36
   1  -3   9   53.24   16.40
  -3   2   9   70.30   19.36
   2   1  10   33.90   13.75
  -2  -1  10   19.02   10.27
   3  -2  10   35.97   16.69
  -1   3  10   22.51   11.05
  -3   2  10   23.94   14.27
   1  -3  10   20.44    9.84
   2   1  11   18.08    8.30
  -2  -1  11   32.70   16.75
   3  -2  11   17.06   10.64
   1  -3  11   21.93   11.02
  -1   3  11   34.93   14.98
  -3   2  11   34.65   17.93
   2   1  12   -9.44   10.83
   1  -3  12   -9.62   11.04
  -1   3  12  -13.98   13.22
  -2  -1  12    5.84    8.96
  -3   2  12    3.26    7.92
  -2  -1  13   33.51   17.42
  -3   2  13   37.59   22.24
   1  -3  13   74.45   26.20
  -1   3  13   54.08   22.69
   2   1  13   21.33   12.20
   1  -3  14   28.78   18.21
  -2  -1  14    9.43   10.87
  -1   3  14   30.38   18.97
   2   1  14   19.65   11.40
  -3   2  14   32.28   17.41
  -3   2  15    9.05    8.53
  -2  -1  15   14.06   14.11
  -1   3  15    4.97   17.43
  -2  -1  16   14.79   15.96
  -3   2  16   10.10   15.59
  -1   3  16   28.21   18.71
  -2  -1  17  -17.84   13.83
  -3   2  17   16.02   14.43
   1   2  -9    5.20    5.83
  -2   3  -9   13.52    7.56
   3  -1  -8  116.96   21.73
  -2   3  -8  112.83   22.49
  -3   1  -8  115.79   23.06
   1   2  -8  117.00   21.82
   1   2  -6  472.17   36.72
  -2   3  -6  490.98   38.28
   1   2  -5  671.63   39.29
   1   2   2 5300.15   83.82
  -1  -2   2 5403.36   66.45
  -2   3   2 5223.38   80.07
  -2   3   3 1401.90   50.46
   1   2   3 1437.50   51.98
  -3   1   3 1410.41   47.12
  -1  -2   3 1364.15   41.74
   2  -3   3 1357.62   45.12
   3  -1   4   44.66    7.19
  -3   1   4   50.23    9.63
   1   2   4   48.58   10.79
   2  -3   4   39.17    8.25
  -2   3   4   49.04    9.90
  -1  -2   4   43.03    8.77
  -2   3   5  606.87   41.10
  -1  -2   5  632.20   38.66
  -3   1   5  699.67   41.92
   2  -3   5  652.54   42.03
   1   2   5  616.16   42.63
   3  -1   5  700.81   45.48
  -2   3   6  483.08   39.26
   3  -1   6  514.26   42.45
   2  -3   6  486.99   38.86
   1   2   6  496.55   41.87
  -1  -2   6  489.40   37.97
  -3   1   6  491.30   38.58
  -3   1   7  155.21   23.57
  -2   3   7  142.22   23.16
  -1  -2   7  147.54   22.31
   3  -1   7  156.58   25.29
   1   2   7  146.18   24.05
   2  -3   7  158.21   24.14
  -2   3   8  117.08   22.77
   3  -1   8   91.84   20.80
  -1  -2   8  114.58   21.59
   1   2   8   98.00   22.00
  -3   1   8  130.07   24.13
   2  -3   8  119.31   22.66
   1   2   9    8.75    7.06
  -1  -2   9   24.42   12.86
   3  -1   9   20.76   12.89
   2  -3   9    2.30   10.68
  -2   3   9    8.04    8.75
   3  -1  10   -5.44    6.82
   1   2  10   -5.12   13.86
  -3   1  10    2.86    8.36
   2  -3  10  -12.35   11.12
  -2   3  10   -4.55    8.91
  -1  -2  10   -0.87    7.58
  -3   1  11   59.95   21.04
  -1  -2  11   38.41   18.51
   1   2  11   53.83   22.44
   2  -3  11   42.69   17.88
   3  -1  11   60.42   21.81
  -2   3  11   49.37   18.37
  -1  -2  12    0.03    9.98
   3  -1  12    1.70   11.30
  -2   3  12   10.94    9.86
   2  -3  12  -14.34   17.24
   1   2  12    2.96   11.89
  -3   1  12   -2.81    9.14
   1   2  13   -1.52    7.83
  -2   3  13   -1.69   11.82
  -1  -2  13    0.85   11.61
   2  -3  13  -24.30   13.32
  -3   1  13    8.47   11.15
   1   2  14    5.98   14.36
  -2   3  14    6.72   10.06
  -1  -2  14   23.15   15.91
  -3   1  14    7.47    8.26
  -1  -2  15   28.04   16.87
   1   2  15  -17.35   18.07
  -3   1  15    3.37   10.00
  -2   3  15   -6.56   14.30
  -1  -2  16   36.02   22.46
  -3   1  16   23.70   19.70
  -2   3  16    9.95   14.09
  -3   1  17   -8.03   15.96
   0   3  -9   45.44   14.27
  -3   3  -9   75.69   20.77
  -3   3  -8   95.34   21.06
   3   0  -8   76.89   17.85
   0   3  -6  101.53   17.28
  -3   3  -6  117.81   20.61
   0   3  -5   -2.68    6.24
   0   3  -4  302.28   23.07
   0   3   1  840.81   24.19
   0  -3   2 7313.14   73.83
   0   3   2 7459.74   98.80
  -3   3   2 7341.17   93.71
  -3   3   3 1605.79   53.14
   0  -3   3 1557.58   44.68
  -3   0   3 1600.38   48.47
   0   3   3 1601.14   54.96
   0  -3   4  296.23   23.11
  -3   3   4  345.34   28.00
  -3   0   4  321.08   25.78
   3   0   4  317.57   28.17
   0   3   4  295.98   27.03
   0  -3   5   -4.83    4.38
   0   3   5   -6.01   10.95
  -3   0   5   10.05    5.75
   3   0   5    5.49    5.68
   3  -3   5   -3.00    6.22
  -3   3   5   -5.29    8.55
   3   0   6  100.17   19.47
   3  -3   6  140.29   22.24
   0   3   6  121.55   20.94
  -3   3   6   95.35   17.51
  -3   0   6  116.83   19.10
   0  -3   6  115.84   19.37
  -3   0   7  186.75   26.00
   3  -3   7  182.79   26.76
  -3   3   7  196.45   27.16
   0   3   7  197.23   28.01
   3   0   7  189.21   27.55
   0  -3   7  209.24   27.42
  -3   0   8   71.03   19.77
  -3   3   8   79.54   20.17
   3  -3   8   47.81   14.55
   0   3   8   80.72   22.91
   0  -3   8   65.53   15.16
   3   0   8   69.01   19.73
   0  -3   9   55.45   18.64
  -3   3   9   44.54   16.99
  -3   0   9   45.56   16.36
   3  -3   9   55.84   18.60
   3   0   9   48.34   15.65
   0   3   9   61.52   18.43
  -3   3  10   57.32   17.86
   0   3  10   48.33   20.59
   0  -3  10   41.51   13.87
  -3   0  10   29.84   14.88
   3  -3  10   54.56   20.03
   3   0  10   31.46   13.69
   0   3  11   82.88   24.52
  -3   0  11   94.40   24.85
   3  -3  11   72.96   23.38
   3   0  11   66.94   22.54
  -3   3  11   95.36   26.18
   0  -3  11   88.91   23.74
   0  -3  12    7.39    7.99
   0   3  12   -5.29    9.08
  -3   0  12   -0.63   13.53
   3   0  12   16.26    9.16
  -3   3  12   -3.81   10.73
   0  -3  13   42.30   18.50
  -3   3  13   30.28   18.15
   0   3  13   56.60   26.11
  -3   0  13   47.68   22.02
  -3   0  14  -12.92   13.23
   0   3  14    4.83   14.82
  -3   3  14   13.95   13.81
   0  -3  14    6.54    9.17
  -3   3  15   17.51   16.53
   0  -3  15   -3.48    8.62
  -3   0  15    1.68    8.99
   0   3  15   13.53   11.98
  -3   3  16    1.91   10.21
   0   3  16   10.81   18.95
  -3   0  16   13.56   11.12
  -3   0  17   -3.41    9.50
   3   1  -9   23.44    9.76
  -1   4  -9    9.36    6.93
   3   1  -8   13.93    5.92
  -4   3  -8   35.68   14.87
  -1   4  -7   27.12   10.69
  -1   4  -6  416.78   34.33
   3   1  -6  391.89   32.63
  -1   4  -5  183.74   20.16
   3   1  -5  172.33   19.60
  -1   4  -4  660.87   33.66
  -1   4  -3  562.34   26.75
  -1   4   2  276.79   18.11
  -4   3   3  609.97   33.08
  -3  -1   3  625.42   29.65
  -1   4   3  568.83   33.32
   1  -4   3  591.19   27.95
   3   1   4  732.94   44.33
   1  -4   4  673.53   34.75
  -1   4   4  683.20   40.86
  -4   3   4  722.15   40.45
  -3  -1   4  747.13   38.07
  -4   3   5  186.13   21.40
  -1   4   5  156.15   20.58
   3   1   5  176.01   22.38
  -3  -1   5  180.62   20.48
   1  -4   5  181.74   20.25
   3   1   6  407.91   38.74
  -1   4   6  434.33   39.17
  -3  -1   6  395.45   33.25
  -4   3   6  453.92   38.26
   1  -4   6  419.07   35.06
   3   1   7  132.39   24.10
  -1   4   7  134.54   22.59
  -4   3   7  142.26   22.50
  -3  -1   7  127.47   21.02
   1  -4   7   95.72   17.54
  -4   3   8   15.72   11.16
  -1   4   8   26.87   12.18
   3   1   8    9.16    7.55
   1  -4   8    1.35    9.64
  -3  -1   8   15.70    8.23
  -1   4   9   29.70   14.52
  -3  -1   9   34.40   13.61
  -4   3   9   26.99   11.20
   3   1   9   14.03   10.90
   1  -4   9   27.28   12.35
  -4   3  10   80.93   23.05
   3   1  10   79.71   23.93
  -3  -1  10   87.40   22.43
  -1   4  10   73.70   22.32
   1  -4  10   60.57   16.94
   1  -4  11   -3.86   13.13
  -1   4  11   -9.75   12.55
   3   1  11   -1.86   11.37
  -4   3  11   10.42   10.57
  -3  -1  11  -19.61   12.25
  -4   3  12   23.82   13.70
   1  -4  12   15.61    9.61
  -1   4  12   24.38   13.73
   3   1  12   29.54   18.22
  -3  -1  12   14.57   12.01
  -1   4  13    6.63   11.17
  -4   3  13   10.92   13.36
   1  -4  13   14.65   13.33
  -3  -1  13   14.43   15.24
   1  -4  14  -10.86   12.62
  -3  -1  14   -6.43   13.67
  -1   4  14   -0.73    9.04
  -4   3  14    5.72   12.30
  -4   3  15   -9.96   16.46
  -3  -1  15   -3.53    8.29
  -1   4  15   17.29   15.76
  -1   4  16   23.21   20.14
  -4   3  16   12.67   15.11
  -3  -1  16   12.76   14.92
  -3  -1  17   18.96   19.48
   2   2  -9   33.64   12.95
  -2   4  -9   23.83   11.10
   2   2  -8  249.31   30.76
   4  -2  -8  255.63   32.97
  -4   2  -8  276.63   35.64
   2   2  -6  175.25   21.73
  -2   4  -6  208.18   24.86
  -2   4  -5  752.51   42.57
   2   2  -5  749.60   40.86
   2   2  -4   23.83    8.12
  -2   4  -4   12.39    4.00
   4  -2  -2  200.19    9.65
   2   2   2  159.31   12.86
  -2  -2   2  169.67   11.42
  -2   4   2  198.71   15.95
  -2   4   2  212.65    9.77
  -2  -2   3   49.38    7.44
   2   2   3   58.68   12.19
  -2   4   3   56.13   10.49
  -4   2   3   66.92   12.65
  -4   2   4   38.22   10.93
  -2  -2   4   33.84    9.44
   2   2   4   24.65    9.80
   2  -4   4   21.58    5.14
  -2   4   4   20.04    6.80
   2  -4   5  787.72   44.61
  -2  -2   5  755.36   41.05
  -4   2   5  792.43   45.77
   2   2   5  778.93   49.69
  -2   4   5  751.82   46.24
   2   2   6  175.00   25.09
  -2  -2   6  166.47   21.67
   2  -4   6  178.35   23.05
  -4   2   6  203.20   25.57
  -2   4   6  195.04   26.00
  -2  -2   7   -6.64    8.07
   2  -4   7   -3.18    9.70
  -2   4   7    2.16   10.21
   2   2   7    3.87    5.99
  -4   2   7   22.66   13.21
  -2  -2   8  270.55   32.78
  -4   2   8  270.52   33.95
   2  -4   8  257.97   33.84
  -2   4   8  253.90   34.87
   2   2   8  238.56   34.67
  -2  -2   9   42.35   15.56
  -2   4   9   51.53   17.12
   2   2   9   27.61    9.39
   2  -4   9   39.40   14.55
  -4   2   9   44.80   15.92
   2   2  10    0.43   10.54
  -2  -2  10   25.07   13.80
   2  -4  10    2.87    7.08
  -2   4  10   15.14    9.26
  -4   2  10    8.83    7.54
   2  -4  11   61.93   21.69
   2   2  11   69.83   20.70
  -4   2  11  101.90   25.29
  -2   4  11  101.96   26.78
  -2  -2  11  103.22   26.07
  -4   2  12    3.98   11.43
   2  -4  12  -12.17   11.57
   2   2  12    0.62    8.72
  -2   4  12    1.19   11.91
  -2  -2  12    8.68    8.65
   2   2  13   20.49   10.63
  -4   2  13    4.72   14.77
  -2   4  13   14.63   15.16
  -2  -2  13   23.09   12.95
  -2  -2  14   10.30   16.31
  -4   2  14    4.92    8.70
  -2   4  14    3.86   10.41
   2   2  14    8.34    9.63
  -4   2  15   -5.87   13.26
  -2  -2  15   10.74   12.87
  -2   4  15  -12.58   15.93
  -2   4  16   33.70   20.94
  -4   2  16    3.56   11.37
  -2  -2  16   19.88   19.45
  -4   2  17   -7.84   13.85
  -2  -2  17   -7.65   18.61
   1   3  -9   36.09   13.33
  -3   4  -9   66.48   18.87
  -3   4  -8  248.27   32.35
   4  -1  -8  272.21   32.97
   1   3  -7   69.40   17.61
  -3   4  -6  133.92   19.75
   1   3  -6  133.40   18.23
   1   3  -5  348.57   27.71
  -3   4  -5  347.64   29.06
   1   3  -4  162.24   15.84
   1   3  -3  820.06   30.90
   1   3   1 1370.08   35.72
  -3   4   2  840.50   33.58
  -1  -3   2  847.34   25.35
   1   3   2  834.54   35.50
  -3   4   3  847.93   39.26
  -1  -3   3  811.91   30.79
  -4   1   3  836.75   36.59
   1   3   3  806.85   39.86
  -4   1   4  186.68   19.67
  -3   4   4  197.51   21.76
  -1  -3   4  156.35   15.51
   1   3   4  152.31   18.15
  -4   1   5  396.66   32.18
   1   3   5  360.13   33.48
  -3   4   5  351.50   30.96
  -1  -3   5  358.11   29.18
  -1  -3   6  117.10   17.71
   1   3   6  139.84   22.32
   3  -4   6  132.99   20.17
  -4   1   6  136.23   21.05
  -3   4   6  122.16   18.72
  -4   1   7  463.37   41.26
  -1  -3   7  467.98   39.58
  -3   4   7  444.23   42.82
   3  -4   7  429.33   40.65
   1   3   7  452.12   43.33
  -1  -3   8  235.71   30.92
   3  -4   8  231.61   32.40
  -3   4   8  249.72   33.87
   1   3   8  227.91   33.00
  -4   1   8  249.06   31.87
   4  -1   8  253.06   35.83
  -4   1   9   73.85   20.09
   3  -4   9   30.12   11.93
  -1  -3   9   41.01   15.66
   1   3   9   29.45    9.46
  -3   4   9   63.39   19.56
  -1  -3  10  116.76   26.40
   1   3  10   71.78   20.59
  -4   1  10   99.36   23.39
  -3   4  10   98.56   25.96
   3  -4  10   91.98   23.66
  -3   4  11   24.64   12.86
  -4   1  11    4.39    9.27
  -1  -3  11   15.67   11.16
   1   3  11   16.08   13.08
   1   3  12   23.62   13.63
  -4   1  12   34.70   17.95
  -1  -3  12   20.89   15.40
  -3   4  12   31.19   16.74
  -4   1  13   37.85   20.35
  -3   4  13   14.69   16.66
   1   3  13   33.73   19.53
  -1  -3  13   27.91   16.59
  -3   4  14   -5.95   13.64
  -4   1  14   11.25   12.86
  -1  -3  14   24.14   17.47
   1   3  14   44.61   23.78
   1   3  15    7.32   14.17
  -1  -3  15  -12.29    9.14
  -3   4  15   -2.44    8.98
  -4   1  15   -1.17   10.22
  -1  -3  16    0.77   11.50
  -4   1  16   19.79   15.06
  -3   4  16    0.18   13.49
  -4   1  17   28.20   23.17
   0   4  -9  148.45   25.70
   4   0  -8   50.18   13.94
  -4   4  -8   53.53   16.26
   0   4  -7  124.75   20.86
  -4   4  -6  173.80   23.32
   4   0  -6  160.21   21.40
   0   4  -6  185.20   22.45
   0   4  -5   86.04   12.22
   0   4  -4  728.62   35.21
   0   4  -3  640.71   27.25
   0   4  -2 4042.79   50.19
   4   0  -1 2756.64   51.78
   0   4   1 2705.81   49.39
   0  -4   2 4019.73   50.97
   0   4   2 4159.58   77.19
   0  -4   3  669.12   28.25
  -4   4   3  664.74   35.53
  -4   0   3  684.75   32.11
   0   4   3  655.04   35.66
  -4   4   4  765.55   42.47
  -4   0   4  735.34   38.87
   0   4   4  721.88   42.23
   0  -4   4  696.14   34.66
  -4   0   5  111.56   16.61
   0   4   5   89.43   13.42
  -4   4   5  116.41   17.58
   0  -4   5   88.02   13.18
   0   4   6  169.59   25.32
  -4   0   6  204.79   25.03
  -4   4   6  183.76   25.46
   0  -4   6  176.20   22.89
   0   4   7  212.73   29.97
  -4   4   7  220.36   29.92
   4   0   7  225.94   31.88
   0  -4   7  204.60   26.80
  -4   0   7  260.48   31.05
   4   0   8   54.60   16.30
  -4   0   8   47.90   14.74
   0  -4   8   45.06   12.56
  -4   4   8   67.80   17.25
   0   4   8   57.76   17.12
  -4   0   9  163.70   29.59
   4   0   9  156.19   28.72
  -4   4   9  156.02   29.06
   0  -4   9  152.13   26.64
   0   4   9  131.11   26.71
  -4   4  10   90.82   25.70
  -4   0  10  101.22   25.59
   0   4  10   70.70   23.35
   0  -4  10   74.41   19.32
   0   4  11   25.64   14.07
   0  -4  11   23.66   15.38
  -4   4  11    3.07    7.22
  -4   0  11    4.81   11.34
  -4   4  12   29.42   18.92
  -4   0  12   31.35   19.30
   0  -4  12   -0.04   11.05
   0   4  12   25.94   15.83
  -4   0  13   27.69   18.37
  -4   4  13   20.41   14.46
   0  -4  13    2.70   11.18
   0   4  13   17.30   13.34
  -4   4  14   -0.82    9.19
  -4   0  14   -0.96   14.23
   0   4  14   -4.66   11.73
   0  -4  14    3.47    9.70
  -4   4  15    0.06   14.31
   0   4  15  -14.38   14.53
  -4   0  15   22.28   17.37
   0  -4  15    2.41   11.76
  -4   4  16   -5.96    9.42
   0   4  16   18.35   18.69
  -4   0  16   -5.33   11.88
  -4   0  17    6.13   10.50
  -1   5  -9   78.61   18.80
   4   1  -9   78.31   19.64
   4   1  -8   18.25    8.65
  -5   4  -8   33.18   13.63
  -1   5  -7    6.59    4.35
  -1   5  -6   31.16    9.52
  -5   4  -6   43.94   13.56
  -1   5  -5   46.19   12.14
  -1   5  -4  156.70   15.14
   1  -5  -3 1235.16   35.73
  -1   5  -3 1102.40   35.29
  -1   5  -2 2514.72   39.67
   1  -5  -1  282.58   16.16
   4   1  -1  270.44   17.83
   4   1   0  265.51   17.88
  -1   5   1  248.34   14.06
  -1   5   2 2619.79   48.93
  -1   5   2 2483.95   58.82
   1  -5   3 1174.09   37.51
  -5   4   3 1208.01   47.10
  -1   5   3 1196.48   48.74
   1  -5   4  151.10   15.81
  -5   4   4  175.99   21.10
  -4  -1   4  181.79   19.66
  -1   5   4  177.78   22.12
  -4  -1   5   38.39   10.67
  -1   5   5   17.64    7.05
   1  -5   5   24.53    9.06
  -5   4   5   23.54    9.96
  -5   4   6   11.86    9.52
  -1   5   6   24.96    8.02
  -4  -1   6   32.77   10.30
   1  -5   6   31.47    8.95
   1  -5   7   15.31    6.82
   4   1   7   20.26   10.78
  -4  -1   7   31.09   11.47
  -5   4   7   45.79   16.87
  -1   5   7   23.75   11.98
  -5   4   8   28.74   13.61
   4   1   8    7.35    8.81
   1  -5   8    0.58    9.05
  -1   5   8    9.16    6.30
  -4  -1   8   19.86    9.94
  -4  -1   9  100.26   22.27
   1  -5   9   62.02   17.78
  -1   5   9   82.22   23.47
   4   1   9   78.56   21.78
  -5   4   9  100.64   23.88
  -5   4  10   61.40   19.37
   1  -5  10   41.17   15.37
  -1   5  10   58.16   22.85
  -4  -1  10   59.13   18.03
   1  -5  11   15.39   11.46
  -4  -1  11   57.58   20.67
  -1   5  11   29.81   14.00
  -5   4  11   26.91   12.92
  -5   4  12   60.41   22.64
  -4  -1  12   39.77   17.88
   1  -5  12   29.30   18.30
  -1   5  12   46.04   18.69
  -4  -1  13   10.34    7.77
  -1   5  13   18.36   14.59
  -5   4  13   10.98   13.23
   1  -5  13    5.66    7.66
  -4  -1  14    9.64   16.87
  -5   4  14   23.53   15.61
  -1   5  14    5.55   12.97
  -5   4  15   17.45   17.44
  -4  -1  15   -8.25   11.35
  -1   5  15   22.21   16.04
  -1   5  16   23.93   22.15
  -4  -1  16   12.49    8.65
  -5   4  16   -2.76    9.89
  -4  -1  17   -2.99    9.07
  -2   5  -9   89.17   19.02
   3   2  -9  117.53   22.03
  -5   3  -8  109.30   22.86
   5  -3  -8  144.21   24.67
   3   2  -8  107.24   19.38
  -2   5  -7   69.70   15.93
   3   2  -6   21.00    6.92
  -2   5  -6   21.41    9.50
  -2   5  -5  488.50   33.50
   3   2  -5  467.31   31.58
  -2   5  -4  885.57   39.27
   5  -3  -3 2367.64   34.05
   2  -5  -3 2578.15   43.54
  -2   5  -3 2492.90   56.57
   3   2   0  741.90   29.88
  -2   5   1 3909.39   60.79
  -5   3   2  802.57   19.74
  -2   5   2  858.09   24.25
  -2   5   2  918.17   36.56
  -3  -2   3 2502.31   57.15
  -2   5   3 2593.82   69.24
   3   2   4  936.71   50.29
  -3  -2   4  973.23   42.12
  -5   3   4  927.40   45.67
  -2   5   4  899.08   46.29
  -2   5   5  502.33   38.34
  -3  -2   5  483.67   33.48
   2  -5   5  482.63   33.74
   3   2   5  487.01   39.72
  -5   3   5  501.59   36.90
   2  -5   6   21.41    6.74
  -3  -2   6   24.34    8.21
  -2   5   6   14.82    4.72
  -5   3   6   15.38    6.77
   3   2   6   17.79    7.68
  -3  -2   7  178.92   24.64
   3   2   7  176.35   26.48
  -5   3   7  232.78   30.66
   2  -5   7  167.15   24.26
  -2   5   7  187.74   28.19
  -5   3   8  141.19   25.05
   2  -5   8  112.18   21.10
  -3  -2   8  109.08   20.61
  -2   5   8  145.23   27.46
   3   2   8  124.17   23.76
   3   2   9  106.91   25.45
   2  -5   9  125.61   26.01
  -3  -2   9  116.38   24.00
  -2   5   9  114.07   26.93
  -5   3   9  139.08   27.88
  -5   3  10    5.40    7.13
  -2   5  10   12.51    9.90
   2  -5  10   -3.92    9.52
  -3  -2  10   25.55   15.22
   3   2  10    5.34    8.94
  -5   3  11    3.21    8.46
   2  -5  11    2.95   10.41
   3   2  11    2.32    9.35
  -3  -2  11  -18.14   12.06
  -2   5  11    4.29    8.00
  -5   3  12   28.71   16.81
  -2   5  12    1.79   10.00
   2  -5  12   11.74   13.47
  -3  -2  12    3.22    9.44
   3   2  12    4.18   11.96
  -3  -2  13   14.79   10.44
  -2   5  13  -15.01   15.10
  -5   3  13   -0.60   11.57
  -3  -2  14    8.15   11.40
  -2   5  14    0.29   10.85
  -5   3  14   14.28    9.20
  -3  -2  15   31.48   20.64
  -2   5  15    8.20   11.26
  -5   3  15   11.92   11.44
  -2   5  16   33.75   22.76
  -3  -2  16    7.61   13.97
  -5   3  16   -3.59   12.22
  -3  -2  17   -6.11    9.77
  -3   5  -9   98.17   22.65
   2   3  -9   44.73   11.86
  -5   2  -8  128.98   24.82
   5  -2  -8  138.29   24.76
   2   3  -7   47.59   13.41
   2   3  -6  338.03   29.70
  -3   5  -6  387.94   34.38
   2   3  -5  130.60   17.01
  -3   5  -5  131.36   18.47
   2   3  -4 1135.53   42.60
  -3   5  -4 1259.12   49.15
  -3   5  -3  119.88   14.03
   5  -2  -2  435.59   17.48
   2   3   0  402.24   22.09
   2   3   1 1156.13   36.92
  -3   5   2  456.31   25.43
  -2  -3   2  389.63   16.36
   2   3   2  390.39   22.29
  -2  -3   3  121.72   12.15
   2   3   3  102.93   14.00
  -3   5   3  115.51   15.67
   2   3   4 1288.94   59.42
  -3   5   4 1297.62   56.41
  -5   2   4 1265.03   51.89
  -2  -3   4 1274.95   45.74
  -5   2   5  141.36   19.79
  -2  -3   5  127.32   17.18
   2   3   5  139.62   21.99
  -3   5   5  139.88   21.21
  -5   2   6  379.97   34.39
  -2  -3   6  374.63   32.25
   2   3   6  375.04   37.47
  -3   5   6  384.82   36.51
  -3   5   7  246.59   31.96
   2   3   7  239.47   31.93
   3  -5   7  224.03   27.56
  -5   2   7  300.84   33.57
  -2  -3   7  233.84   27.26
  -3   5   8  122.27   24.79
   3  -5   8   88.67   17.86
  -5   2   8  123.43   23.44
  -2  -3   8  127.71   22.41
   2   3   8  100.72   22.80
  -3   5   9   66.42   19.16
   3  -5   9   57.11   16.18
  -5   2   9   81.20   20.70
   2   3   9   44.55    8.61
  -2  -3   9   67.82   16.45
  -3   5  10   41.50   17.59
  -2  -3  10   44.89   17.75
  -5   2  10   42.75   18.82
   2   3  10   22.88   13.18
   2   3  11   14.55   12.62
  -3   5  11    8.56    8.25
  -5   2  11   16.01   12.29
  -2  -3  11   14.47   11.02
  -2  -3  12   25.20   14.56
  -3   5  12   50.76   23.38
  -5   2  12   32.95   18.16
   2   3  12   43.03   17.40
  -5   2  13   35.58   19.97
   2   3  13   32.95   19.43
  -3   5  13   44.16   22.16
  -2  -3  13   23.39   14.65
  -3   5  14   38.02   19.94
  -5   2  14    8.55   12.49
  -2  -3  14    3.30   14.12
   2   3  14   -5.95   10.52
  -5   2  15    3.27   10.89
  -2  -3  15   -0.38    8.45
  -3   5  15  -21.01   14.06
  -2  -3  16   -3.96   12.56
  -3   5  16   20.17   19.06
  -5   2  16   -3.70   12.67
  -2  -3  17  -10.70   17.05
  -4   5  -9   28.62   12.19
   1   4  -9    2.01    7.63
  -4   5  -8   82.20   18.85
   1   4  -7   58.35   13.86
  -4   5  -6  265.19   28.63
   1   4  -6  205.56   23.45
   1   4  -5  553.80   33.98
  -4   5  -5  593.95   39.41
  -4   5  -4   12.64    5.57
   1   4  -4    4.59    3.91
   1   4  -3  166.89   12.93
   5  -1  -2 4006.73   62.50
  -1  -4  -1  988.83   31.23
  -1  -4   0 2440.87   35.16
   1   4   1  963.91   31.11
   1   4   1  988.66   33.99
  -1  -4   2 3943.29   50.15
   1   4   2 4003.95   78.07
  -4   5   3  190.70   19.99
  -1  -4   3  146.18   12.50
   1   4   3  153.74   16.34
   1   4   4   16.82    9.08
  -1  -4   4    8.88    3.52
  -4   5   4   23.72    9.18
  -5   1   4   31.08   10.08
  -5   1   5  595.89   39.61
   1   4   5  589.46   43.12
  -1  -4   5  545.58   34.72
  -4   5   5  582.04   41.64
   1   4   6  248.04   31.31
  -4   5   6  267.61   31.16
  -5   1   6  249.60   28.13
  -1  -4   6  238.96   25.91
  -4   5   7   81.46   18.36
  -1  -4   7   74.32   16.45
  -5   1   7  102.43   21.32
   1   4   7   70.33   18.16
  -1  -4   8   56.28   14.40
  -4   5   8   54.94   15.95
  -5   1   8   70.56   17.05
   1   4   8   41.00   13.16
  -5   1   9   27.50   12.82
  -1  -4   9   12.15    6.46
   1   4   9  -12.89   15.32
  -4   5   9    8.95   10.38
  -5   1  10   36.59   16.43
  -4   5  10   41.35   18.94
   1   4  10   27.68   15.99
  -1  -4  10   39.34   15.86
  -5   1  11   33.07   16.72
  -1  -4  11   13.26   14.10
   1   4  11   21.40   14.56
  -4   5  11   25.55   15.32
  -5   1  12   29.28   17.85
  -1  -4  12   18.07   10.20
  -4   5  12   14.14   17.25
   1   4  12   19.58   17.76
  -1  -4  13   18.23   13.65
   1   4  13   25.35   17.41
  -5   1  13   28.08   16.90
  -4   5  13    4.04    9.08
  -5   1  14   16.31   13.28
  -4   5  14   15.10   15.55
   1   4  14   31.90   17.76
  -1  -4  14   13.36   15.21
  -1  -4  15    6.80   11.12
   1   4  15   15.04   12.04
  -4   5  15   19.70   17.98
  -5   1  15    5.77   14.52
  -4   5  16    8.90   11.62
  -1  -4  16    5.49   10.59
  -5   1  16   -2.90   10.58
  -5   1  17    4.01   13.19
   0   5  -9   -2.70    5.23
  -5   5  -8    9.74    4.86
   0   5  -7  116.71   19.02
   0   5  -6  458.91   34.45
  -5   5  -6  495.19   40.58
   0   5  -5  324.62   26.23
  -5   5  -5  323.16   29.75
   0   5  -4  145.26   14.75
   0   5  -3  357.36   19.32
   0  -5  -3  415.03   23.61
   0   5  -2 2127.57   32.98
   5   0  -2 2358.16   52.65
   0  -5  -2 2245.84   56.48
   0  -5  -1 2191.22   45.41
   5   0  -1 2129.93   51.63
   0   5   1 2258.44   47.42
   0   5   2 2337.14   52.10
   0   5   2 2367.65   59.66
   0  -5   2 2187.64   35.16
   0   5   3  387.94   28.65
  -5   5   3  387.18   27.75
   0  -5   3  348.16   19.58
   0  -5   4  138.57   14.44
  -5   0   4  146.13   17.85
  -5   5   4  160.17   20.60
   0   5   4  143.93   18.44
  -5   5   5  351.94   31.89
   0   5   5  338.50   31.78
   0  -5   5  310.38   26.34
  -5   0   5  345.01   29.57
  -5   5   6  485.20   41.19
   0  -5   6  451.71   34.82
   0   5   6  460.40   41.36
  -5   0   6  490.66   38.34
  -5   5   7  150.63   24.26
  -5   0   7  154.96   24.43
   0  -5   7  137.00   20.87
   0   5   7  148.96   26.69
   0  -5   8   -4.16   10.66
  -5   5   8   15.17    6.81
  -5   0   8   15.23    6.62
   0   5   8    6.00    7.35
  -5   5   9   16.31   11.03
  -5   0   9   11.04   11.90
   0   5   9    3.36    9.29
   0  -5   9   -3.22    9.07
  -5   5  10   81.08   22.97
   0   5  10   69.56   21.80
  -5   0  10   70.50   20.61
   0  -5  10   37.55   15.82
  -5   5  11   98.83   26.47
  -5   0  11   90.44   24.80
   0   5  11  104.99   28.77
   0  -5  11   80.24   23.73
  -5   5  12   61.48   23.79
  -5   0  12   81.68   25.00
   0  -5  12   55.89   20.80
   0   5  12   67.78   26.56
   0  -5  13   11.09    8.79
  -5   0  13   43.53   22.52
  -5   5  13   42.95   19.40
   0   5  13   36.64   21.38
   0   5  14    4.09    9.65
  -5   0  14    3.63    9.76
   0  -5  14  -19.68   15.16
  -5   5  14   15.13   14.87
  -5   0  15   11.49   14.24
   0   5  15   -7.69   16.50
  -5   5  15   -7.79   10.67
   0   5  16   22.86   22.03
  -5   0  16   11.74   14.26
  -5   5  16    0.14   14.91
  -5   0  17    6.46   14.33
  -1   6  -9  -11.89    6.75
  -6   5  -8  100.03   21.71
  -1   6  -7   90.29   16.62
  -1   6  -6   30.55    7.52
  -6   5  -6   14.16    7.93
   1  -6  -5  559.58   29.11
  -6   5  -5  640.61   43.29
  -1   6  -5  554.29   33.41
   1  -6  -4   72.53   10.20
  -1   6  -4   61.50    9.17
   1  -6  -3  137.18   16.88
  -1   6  -3  133.65   11.89
   1  -6  -3  129.20   12.26
  -1   6  -2  197.16   10.39
   1  -6  -2  229.83   18.57
   5   1  -1 5172.37   86.73
   1  -6  -1 5266.07   71.40
  -1   6   0   -3.66    2.67
  -1   6   1 5405.32   72.77
  -1   6   2  175.63   15.24
  -1   6   2  236.06   16.53
  -1   6   3  115.67   15.09
  -1   6   4   66.36   11.73
  -6   5   4   82.64   15.42
   1  -6   4   55.65    8.44
  -5  -1   4   90.68   14.05
  -1   6   5  610.39   43.39
  -6   5   5  616.31   42.97
  -5  -1   5  585.25   38.16
   1  -6   5  543.84   34.42
  -6   5   6   29.53    8.13
  -1   6   6   28.33   10.50
  -5  -1   6   52.17   12.37
   1  -6   6   27.45    7.06
  -1   6   7  111.82   22.33
  -5  -1   7  123.08   20.96
  -6   5   7  104.39   21.16
   1  -6   7  104.20   19.71
  -1   6   8  111.09   23.26
  -6   5   8  109.93   23.46
  -5  -1   8   95.34   19.74
   1  -6   8   87.22   18.69
  -1   6   9    8.85   11.21
  -6   5   9    5.60    9.20
  -5  -1   9   11.20    8.81
   1  -6   9   -0.24    6.90
  -1   6  10   26.42   14.51
   1  -6  10   19.36   11.53
  -5  -1  10   12.06    8.14
  -6   5  10   33.78   17.53
  -1   6  11   59.16   21.28
  -6   5  11   66.92   22.79
  -5  -1  11   53.23   19.09
   1  -6  11   83.71   23.29
  -1   6  12   46.57   24.88
  -6   5  12   33.72   17.10
  -5  -1  12   34.55   18.32
   1  -6  12   21.16   15.57
   1  -6  13   13.85    7.18
  -6   5  13    6.47    9.46
  -5  -1  13   15.82   13.61
  -1   6  13   22.83   16.20
  -5  -1  14   23.12   16.37
  -1   6  14   19.67   18.48
  -6   5  14  -21.02   10.77
  -6   5  15    6.46    8.57
  -1   6  15    3.14   14.09
  -5  -1  15    9.81    9.17
  -1   6  16   13.21   12.35
  -5  -1  16  -19.16   19.37
  -6   5  16   28.88   19.91
  -5  -1  17    7.33   12.20
   4   2  -9  292.39   34.98
  -2   6  -9  263.68   34.89
   4   2  -8   58.83   15.51
  -6   4  -8   70.01   18.37
  -2   6  -7  189.24   25.24
  -2   6  -6  224.32   24.66
  -2   6  -5  255.74   23.89
   2  -6  -4 1167.61   35.12
  -2   6  -4 1106.27   42.69
   6  -4  -4  953.98   21.66
  -2   6  -3  119.19   11.75
   2  -6  -2   18.47    5.62
   4   2  -1   46.52    6.21
   4   2   0 2004.07   54.27
  -2   6   1   56.07    7.45
  -2   6   2   34.44    6.62
  -2   6   2   28.66    7.73
  -2   6   3  126.51   15.97
  -6   4   4 1181.02   53.23
  -2   6   4 1136.48   53.21
  -4  -2   4 1155.75   46.36
  -2   6   5  280.08   28.99
  -4  -2   5  288.67   25.81
  -6   4   5  287.53   29.69
   2  -6   5  260.72   24.52
  -2   6   6  235.16   28.56
  -4  -2   6  250.56   26.51
  -6   4   6  234.54   26.40
   2  -6   6  242.34   25.78
  -2   6   7  199.80   29.65
   4   2   7  192.25   29.02
   2  -6   7  193.34   25.60
  -4  -2   7  192.04   24.92
  -6   4   7  198.21   28.70
  -6   4   8   84.62   22.08
   4   2   8   58.69   18.07
  -4  -2   8   42.05   12.41
  -2   6   8   67.49   19.96
   2  -6   8   69.47   18.40
  -4  -2   9  309.53   37.93
   4   2   9  272.48   40.08
  -6   4   9  278.79   37.42
  -2   6   9  269.32   39.30
   2  -6   9  273.20   36.64
  -4  -2  10   41.46   17.02
  -2   6  10   26.82   14.75
   2  -6  10   19.86    7.83
   4   2  10   32.82   13.61
  -6   4  10   35.66   15.55
  -2   6  11    2.27   10.07
  -6   4  11  -14.45   11.75
   2  -6  11  -12.99   16.25
  -4  -2  11   -2.28    8.40
  -2   6  12   53.48   24.08
  -4  -2  12   44.72   18.00
  -6   4  12   49.15   20.60
  -2   6  13   19.47   17.75
  -4  -2  13   21.23   15.38
  -6   4  13    4.85   10.71
  -2   6  14    8.99    9.60
  -4  -2  14   11.26   11.69
  -6   4  14    1.02   12.25
  -6   4  15   -4.40   10.41
  -2   6  15    3.84   14.87
  -4  -2  15  -14.22    8.63
  -2   6  16   27.28   23.43
  -6   4  16   25.03   21.78
  -4  -2  16    7.08   12.69
  -4  -2  17    9.98   14.56
  -3   6  -9   81.73   21.64
   3   3  -9   51.07   14.57
  -6   3  -8   75.05   19.45
  -3   6  -7    4.93    5.90
   3   3  -7    1.39    3.72
  -3   6  -6   58.35   13.26
   3   3  -6   58.07   11.95
  -3   6  -5  268.54   24.55
   3  -6  -5  283.91   16.37
   3  -6  -4  170.52   11.36
  -3   6  -4  196.90   19.81
   6  -3  -3  765.68   23.19
  -3   6  -3  791.59   33.01
   3   3   0  320.41   21.76
  -3   6   1 1791.73   42.23
   3   3   1 1851.08   51.95
  -6   3   2 2334.31   42.46
  -3   6   2 2415.68   60.56
  -3  -3   3  785.96   30.77
  -3   6   3  813.37   40.59
   3   3   4  246.58   28.93
  -3   6   4  228.44   24.72
  -3  -3   4  209.32   20.20
  -6   3   4  207.87   23.18
  -6   3   5  312.99   29.86
  -3   6   5  294.06   29.51
   3   3   5  313.47   31.68
  -3  -3   5  325.76   26.90
   3   3   6   62.94   14.35
  -3   6   6   76.06   16.29
  -3  -3   6   75.34   13.92
  -6   3   6   70.89   15.04
  -3  -3   7    4.09    5.46
  -3   6   7   -0.48    6.12
   3   3   7   -0.98    8.71
  -6   3   7    3.16    5.93
  -3   6   8   90.76   22.05
  -6   3   8  106.85   23.43
  -3  -3   8   69.19   16.16
   3   3   8   70.45   19.16
  -3  -3   9   53.08   15.59
  -6   3   9   89.87   21.60
  -3   6   9   77.76   21.70
   3   3   9   60.02   20.41
  -3   6  10   32.72   14.57
  -6   3  10   42.79   17.67
   3   3  10   17.21    8.96
  -3  -3  10   26.91   10.22
  -3  -3  11   -6.54    6.58
  -3   6  11   -0.06   10.27
  -6   3  11    3.10    7.58
   3   3  11  -19.59   16.26
  -6   3  12   20.57   14.36
  -3  -3  12   12.87   10.73
  -3   6  12   25.63   19.12
   3   3  12  -14.74   17.16
  -3   6  13   40.99   20.38
  -6   3  13   19.88   15.77
  -3  -3  13    8.00   13.37
  -3   6  14  -10.76   12.29
  -3  -3  14   -0.17   12.84
  -6   3  14   -0.57   10.66
  -3  -3  15   20.64   14.07
  -6   3  15   -6.36   10.89
  -3   6  15    3.46   10.25
  -3  -3  16   -7.15   13.78
  -6   3  16    4.00   11.75
  -3   6  16   26.30   19.72
  -3  -3  17    3.72   11.11
  -4   6  -9   30.63   14.96
   2   4  -9    3.15    8.09
  -4   6  -8   81.26   18.17
  -6   2  -8   62.23   17.81
   2   4  -7   18.56    6.27
  -4   6  -6  125.88   19.54
   2   4  -6  112.13   16.77
  -4   6  -5  286.76   26.37
   2   4  -5  282.84   23.50
   4  -6  -5  221.51   12.06
  -4   6  -4  171.98   18.84
   6  -2  -3 1317.44   35.85
  -2  -4  -2 1402.29   47.38
  -2  -4  -1  283.40   18.01
  -6   2   1  297.99   17.89
   2   4   1  307.75   21.08
  -6   2   2 1407.83   36.64
  -4   6   2 1461.70   47.03
   2   4   3 1405.02   56.60
  -2  -4   3 1329.25   39.31
  -4   6   3 1378.00   53.89
  -6   2   4  184.93   20.36
   2   4   4  198.07   23.71
  -2  -4   4  198.72   18.31
  -4   6   4  213.27   24.34
  -4   6   5  294.11   29.43
  -2  -4   5  294.61   24.63
  -6   2   5  313.93   29.03
   2   4   5  302.41   31.30
  -6   2   6  144.36   21.13
   2   4   6  111.17   20.41
  -2  -4   6  137.88   18.60
  -4   6   6  154.18   23.27
   2   4   7   23.91    8.05
  -6   2   7   23.24    8.02
  -4   6   7   42.88   13.75
  -2  -4   7   30.82   10.74
  -4   6   8   58.77   17.97
  -2  -4   8   47.02   11.77
  -6   2   8   76.56   19.89
   2   4   8   47.10   13.25
   2   4   9   -2.24   10.40
  -4   6   9    0.10    7.31
  -2  -4   9   28.12   12.95
  -6   2   9   36.03   15.62
  -4   6  10   57.47   18.54
   2   4  10   60.77   18.82
  -2  -4  10   50.72   19.02
  -6   2  10   49.08   19.17
  -4   6  11   27.54   16.88
  -6   2  11   43.99   18.47
   2   4  11   21.82   13.01
  -2  -4  11   13.65    9.81
  -2  -4  12   37.25   17.66
   2   4  12   39.14   18.70
  -4   6  12   76.54   25.73
  -6   2  12   70.61   25.13
  -2  -4  13   19.51   13.56
  -6   2  13   14.38   12.51
  -4   6  13   24.35   18.05
   2   4  13   11.55   10.74
  -6   2  14   14.74   13.85
  -2  -4  14   27.45   16.75
   2   4  14    2.99   12.14
  -4   6  14    7.20   14.27
  -4   6  15    9.36   16.54
  -2  -4  15   15.82   13.88
  -6   2  15   10.87   12.56
  -2  -4  16    7.52   15.66
  -4   6  16   -6.25   14.08
  -6   2  16    5.31   12.47
   1   5  -9   -4.36    8.00
  -5   6  -9    9.26    9.60
  -5   6  -8  105.37   21.32
   1   5  -7    3.02    4.33
   1   5  -6  130.61   18.34
  -5   6  -6  153.71   21.91
  -5   6  -5   64.09   13.14
   1   5  -5   39.43    6.33
  -1  -5  -4  520.21   29.96
   1   5  -4  472.49   25.62
  -5   6  -4  507.24   32.92
  -1  -5  -3  447.61   27.18
   6  -1  -3  416.09   22.14
  -1  -5  -3  388.73   28.39
  -1  -5  -2 3486.43   73.81
   6  -1  -2 3559.39   66.15
  -1  -5  -1 3125.14   57.42
  -1  -5   0 3009.06   42.05
   1   5   1 3120.02   65.17
   1   5   1 3163.65   58.69
  -6   1   1 3004.98   61.73
   1   5   2 3566.36   76.58
   1   5   2 3543.60   71.13
  -1  -5   2 3370.25   43.34
  -5   6   3  446.64   30.56
   1   5   3  429.45   31.30
  -1  -5   3  430.32   20.90
  -1  -5   4  519.17   28.02
  -5   6   4  538.46   37.05
  -6   1   4  517.53   33.08
   1   5   4  516.07   36.92
  -5   6   5   60.04   12.70
   1   5   5   39.97    9.78
  -6   1   5   66.04   14.61
  -1  -5   5   52.99    9.81
  -1  -5   6  119.76   17.46
   1   5   6  116.71   20.74
  -5   6   6  144.17   23.47
  -6   1   6  132.09   20.25
  -5   6   7   10.92    9.43
   1   5   7   14.13    8.19
  -1  -5   7    7.42    5.63
  -6   1   7    2.70    7.34
  -5   6   8  102.67   21.48
  -6   1   8  130.01   24.18
   1   5   8  116.02   23.53
  -1  -5   8  104.82   19.74
  -1  -5   9    4.07    6.94
   1   5   9    8.64   10.84
  -5   6   9   14.48   10.98
  -6   1   9    2.09    8.95
  -6   1  10   83.04   21.67
   1   5  10   73.51   21.76
  -5   6  10   75.08   22.18
  -1  -5  10   57.15   19.06
  -5   6  11   85.34   25.16
   1   5  11   57.60   20.75
  -6   1  11   99.25   25.47
  -1  -5  11   74.45   21.18
  -5   6  12   42.59   21.31
  -6   1  12   37.64   17.74
  -1  -5  12   16.71   12.96
   1   5  12   25.42   15.43
  -1  -5  13    3.71    8.55
   1   5  13    9.56   10.19
  -5   6  13   16.25   12.56
  -6   1  13    8.54   11.58
  -6   1  14   17.77   17.53
  -1  -5  14   25.66   16.06
   1   5  14    6.91   11.31
  -5   6  14    4.14    9.57
  -6   1  15   -4.89    9.38
   1   5  15   -3.98   13.92
  -5   6  15    2.83   11.00
  -1  -5  15   12.09   12.51
  -5   6  16   -4.92   12.26
  -6   1  16   12.55   16.91
  -6   1  17   24.53   17.64
   0   6  -9   16.96    9.11
  -6   6  -8   64.05   17.73
   0   6  -7    4.45    4.84
   0   6  -6   33.29    8.45
  -6   6  -6   50.11   13.94
  -6   6  -5  542.17   38.99
   0  -6  -5  505.99   30.31
   0   6  -5  463.40   30.02
   0   6  -4  335.59   21.61
   0  -6  -4  346.25   28.90
   0  -6  -4  374.59   24.67
   0   6  -3  167.73   12.42
   0  -6  -3  153.73   16.87
   0  -6  -3  199.78   17.74
   6   0  -2 1131.33   41.06
   0  -6  -2 1062.95   39.87
   0  -6  -1 1032.93   32.25
   6   0  -1 1068.48   40.28
   0   6   0 8094.76   66.45
   0  -6   0 8202.30   65.45
   0   6   1 1089.32   34.45
   0   6   2 1085.42   42.33
   0   6   2 1152.04   40.32
   0  -6   3  178.55   13.27
   0   6   3  185.51   20.78
   0   6   4  360.36   30.28
  -6   6   4  368.31   30.40
   0  -6   4  347.47   22.51
  -6   0   4  373.63   27.78
   0   6   5  536.66   42.15
   0  -6   5  478.30   31.59
  -6   6   5  536.97   41.11
  -6   0   5  557.84   37.91
  -6   6   6   49.22   12.46
   0   6   6   31.34   10.08
  -6   0   6   53.30   12.78
   0  -6   6   44.21    9.46
  -6   0   7    2.28    6.65
   0  -6   7   11.92    6.35
  -6   6   7    7.45    7.68
   0   6   7    8.12    6.83
   0  -6   8   34.92   11.12
  -6   6   8   71.10   20.37
  -6   0   8   78.18   19.07
   0   6   8   37.19   15.03
  -6   0   9   17.61    9.32
   0  -6   9   11.21    5.75
   0   6   9   11.82    9.26
  -6   0  10   48.14   16.62
   0   6  10   26.67   15.39
   0  -6  10   30.49   13.54
  -6   6  10   43.01   16.44
  -6   6  11   19.67   14.68
   0   6  11   15.76   12.41
   0  -6  11   30.49   15.03
  -6   0  11   24.72   14.58
  -6   6  12    8.05   12.05
   0  -6  12   -1.39    7.06
   0   6  12   15.34   15.87
  -6   0  12   20.23   12.46
  -6   6  13    4.15    9.66
  -6   0  13   23.80   16.71
   0  -6  13   24.94   15.64
   0   6  13   13.72   14.70
  -6   6  14    2.73    9.13
  -6   0  14   -1.36   11.27
   0  -6  14   -0.93   14.49
   0   6  14    5.28   14.36
  -6   6  15   -5.83    8.47
   0   6  15   17.14   17.21
  -6   0  15    9.20   12.74
  -6   6  16   15.33   17.42
  -6   0  16    2.16    9.61
   0   6  16    4.47   10.11
  -6   0  17   -2.87    9.13
  -1   7  -9   18.21    8.12
  -7   6  -8  238.71   32.96
  -1   7  -7    2.87    6.56
   1  -7  -6   -0.31    3.01
  -1   7  -6   -4.88    6.86
  -1   7  -5   37.48    7.77
  -7   6  -5   51.81   12.69
   1  -7  -5   44.07    9.52
   1  -7  -5   23.27    5.64
  -1   7  -4  286.91   19.69
   1  -7  -4  271.72   26.16
   1  -7  -4  304.58   21.36
  -1   7  -3  395.98   18.40
   1  -7  -3  384.30   28.44
   6   1  -2  334.49   24.87
   1  -7  -2  303.61   21.93
   1  -7  -1  419.20   21.25
   6   1  -1  417.13   27.19
  -1   7   0  424.00   15.79
  -1   7   1  434.98   22.14
  -1   7   2  328.99   23.27
  -1   7   2  321.88   21.03
  -1   7   3  366.61   22.42
  -1   7   3  401.80   29.64
  -7   6   4  290.94   27.21
   1  -7   4  270.84   19.46
  -1   7   4  286.73   27.24
  -7   6   5   59.08   15.64
  -6  -1   5   49.75   12.08
  -1   7   5   23.90    6.06
   1  -7   5   45.81   10.31
  -1   7   6   -9.07   10.33
  -7   6   6   -7.19    8.83
   1  -7   6   -9.30    7.03
  -6  -1   6    2.46    4.78
  -6  -1   7    4.79    5.92
  -1   7   7   14.97    8.20
  -7   6   7    1.66    6.36
   1  -7   7    3.16    6.19
  -7   6   8  233.46   34.04
  -6  -1   8  247.35   31.42
   1  -7   8  208.38   28.94
  -1   7   8  233.19   34.98
  -6  -1   9   34.54   12.79
  -1   7   9    8.74    6.55
  -7   6   9   27.38   13.33
   1  -7   9   12.19    6.66
  -1   7  10   71.48   21.34
   1  -7  10   66.53   19.29
  -7   6  10   74.10   23.72
  -6  -1  10   72.51   19.95
  -7   6  11   15.11   13.66
  -1   7  11  -11.02   11.59
   1  -7  11   -6.84   11.13
  -6  -1  11   -3.47    7.70
  -7   6  12    2.54   11.36
  -6  -1  12   16.56   15.81
  -1   7  12    6.94   10.26
   1  -7  12    3.90   10.19
  -6  -1  13   -3.05   13.42
  -1   7  13   -6.92   11.51
  -7   6  13  -17.77   12.08
  -7   6  14   19.49   17.16
  -1   7  14   -2.28   12.40
  -6  -1  14   22.05   16.48
  -7   6  15   -2.83   11.33
  -1   7  15    4.83   13.00
  -6  -1  15   10.33   13.11
  -7   6  16   25.22   18.05
  -6  -1  16  -16.02   18.40
  -1   7  16   -0.09   16.45
  -6  -1  17  -23.04   14.82
  -2   7  -9   57.94   16.62
  -7   5  -8  129.83   24.44
  -7   5  -7   14.10    9.61
  -2   7  -7   12.89    7.04
  -2   7  -6    5.28    3.96
   2  -7  -6   10.64    3.14
   2  -7  -5   97.90   11.87
  -2   7  -5  119.94   16.12
   2  -7  -4  488.95   35.47
  -2   7  -4  450.91   26.64
   2  -7  -3  171.30   18.31
  -2   7  -3  152.37   12.74
   2  -7  -2 1440.32   46.56
  -2   7  -2 1336.74   29.35
   5   2  -1 1815.46   55.41
   5   2   0  329.66   23.80
  -2   7   0  317.93   14.28
  -2   7   1 1852.70   45.79
  -2   7   2 1337.35   45.75
  -2   7   3  150.90   16.66
  -2   7   3  159.84   13.32
  -7   5   4  495.14   35.21
  -2   7   4  483.14   36.19
  -5  -2   4  473.66   29.99
  -2   7   5   82.21   15.37
  -7   5   5  112.74   18.64
  -5  -2   5  112.87   16.65
  -2   7   6   12.51    6.00
   2  -7   6    8.98    5.22
  -5  -2   6   17.63    6.31
  -7   5   6   12.58    5.86
  -2   7   7   20.09    9.32
   2  -7   7   14.14    7.25
  -5  -2   7   29.68   10.28
  -7   5   7   -1.13    9.69
  -2   7   8  125.32   24.52
  -5  -2   8   98.45   20.49
  -7   5   8  108.88   23.75
   2  -7   8   84.52   17.25
  -7   5   9   79.89   22.64
   2  -7   9   60.01   16.81
  -5  -2   9   65.35   19.34
  -2   7   9   60.10   16.80
  -5  -2  10   51.37   17.80
  -7   5  10   76.35   22.85
  -2   7  10   88.66   23.16
   2  -7  10   53.02   18.07
  -2   7  11   46.67   19.96
  -7   5  11   69.58   22.13
  -5  -2  11   69.79   20.66
  -7   5  12   65.28   23.36
  -5  -2  12   37.52   17.85
  -2   7  12   18.89   15.02
  -7   5  13  -12.93   13.54
  -5  -2  13   -7.50    7.95
  -5  -2  14    4.79   11.34
  -7   5  14   15.85   16.98
  -2   7  14   21.29   18.92
  -7   5  15   -1.69    8.39
  -2   7  15    2.67    8.66
  -5  -2  15    6.87   12.30
  -7   5  16   26.87   20.16
  -5  -2  16   -6.12   10.07
  -2   7  16   25.46   20.86
  -5  -2  17    4.58   12.00
  -3   7  -9   10.52   10.52
  -7   4  -8   63.57   18.29
  -3   7  -7   11.05    8.77
  -7   4  -7   11.30    7.58
  -3   7  -6  495.09   37.15
   3  -7  -6  482.03   24.43
   3  -7  -5  103.35   11.08
  -3   7  -5  119.47   16.87
   7  -4  -4  322.46   14.95
  -3   7  -4  373.71   25.63
   3  -7  -3  109.70   14.93
  -3   7  -3  108.73   12.13
   4   3   0 4985.63   91.38
   4   3   1  689.73   34.38
  -3   7   1  657.29   26.92
  -3   7   2  872.45   38.04
  -3   7   3   86.69   12.29
  -3   7   3   89.04    8.93
  -3   7   4  412.23   32.62
  -7   4   4  394.44   31.07
  -4  -3   4  379.20   26.33
  -7   4   5  141.21   21.73
  -3   7   5   94.12   17.41
  -4  -3   5  113.27   16.48
  -4  -3   6  519.20   37.36
  -7   4   6  491.48   41.49
  -3   7   6  509.84   43.67
  -7   4   7    3.11    7.78
  -3   7   7   18.30    9.79
  -4  -3   7   21.01   10.56
   4   3   7   22.65   11.18
  -7   4   8   51.22   17.65
   4   3   8   51.63   17.57
  -3   7   8   55.36   18.49
  -4  -3   8   60.53   16.90
  -7   4   9   12.11   10.57
  -3   7   9    0.60    9.78
   4   3   9    5.34    7.92
  -4  -3   9   29.33   14.10
  -3   7  10    6.39    7.25
  -4  -3  10   -0.74    8.18
  -7   4  10   21.29   15.53
  -4  -3  11   26.95   13.47
  -3   7  11  -15.06   14.45
  -7   4  11   21.25   16.04
  -7   4  12   28.35   15.66
  -3   7  12   51.64   22.36
  -4  -3  12   23.36   14.37
  -4  -3  13   21.88   15.05
  -3   7  13   22.03   16.98
  -7   4  13   10.25   13.18
  -7   4  14   -6.07    8.89
  -3   7  14   -2.53   10.66
  -4  -3  14    3.74    9.28
  -3   7  15    8.50   13.13
  -7   4  15   -0.47   10.40
  -4  -3  15    7.28    8.16
  -3   7  16   31.30   21.15
  -4  -3  16  -12.35   13.27
  -7   4  16    1.09   12.07
  -4  -3  17    2.59    9.11
  -4   7  -9    6.23    9.30
   3   4  -9   -2.73    6.94
  -7   3  -8   23.09   11.87
   3   4  -7    9.12    4.52
  -4   7  -7    3.32    4.00
   4  -7  -6  126.45   10.89
  -4   7  -6  137.91   20.37
  -4   7  -5  140.73   19.59
  -4   7  -4   83.90   12.87
   7  -3  -4   78.07    8.45
  -3  -4  -3 1243.13   53.20
  -3  -4  -2  356.87   25.06
   3   4   0 1183.20   43.89
   3   4   1  401.56   25.54
  -4   7   2  410.48   26.74
  -7   3   2  347.50   19.10
  -4   7   3 1099.51   26.51
  -3  -4   3 1134.68   36.02
  -4   7   3 1287.14   52.59
  -4   7   4   91.05   16.37
   3   4   4  102.56   17.56
  -3  -4   4   89.06   12.27
   3   4   5  121.49   20.83
  -7   3   5  168.92   23.20
  -4   7   5  156.37   22.75
  -3  -4   5  147.61   18.03
  -7   3   6  179.45   24.75
   3   4   6  161.81   26.05
  -4   7   6  159.57   24.43
  -3  -4   6  149.34   19.82
  -4   7   7   22.19    8.42
  -3  -4   7   13.25    5.76
  -7   3   7   29.79   10.58
   3   4   7   17.65    9.43
  -3  -4   8   14.02    5.20
  -7   3   8    6.99    6.36
   3   4   8    4.99    7.32
  -4   7   8   11.96    6.31
   3   4   9  -10.22   10.25
  -3  -4   9   -3.54    5.33
  -4   7   9    0.42    8.60
  -7   3  10   40.22   14.49
  -3  -4  10   19.63    8.85
   3   4  10   11.49    8.63
  -4   7  10   20.40   12.61
  -3  -4  11   66.26   20.20
  -4   7  11   50.36   17.72
   3   4  11   40.42   19.72
  -7   3  11   76.95   23.93
  -4   7  12   -5.02   12.46
  -3  -4  12   -4.16   10.70
   3   4  12  -20.57   12.35
  -7   3  12   14.52   12.19
  -4   7  13   24.84   14.41
  -7   3  13   27.80   16.48
  -3  -4  13   -5.43    8.87
  -7   3  14   27.50   19.95
  -3  -4  14   23.85   16.54
  -4   7  14   23.80   20.07
  -4   7  15    1.82    8.30
  -7   3  15   14.34   16.47
  -3  -4  15   11.86   13.93
  -4   7  16    4.94   10.52
  -3  -4  16   17.57   15.62
  -7   3  16  -15.08    9.80
  -3  -4  17   -8.88   16.23
   2   5  -9   41.43   12.32
  -5   7  -9   43.43   16.43
  -5   7  -8   91.32   19.38
   2   5  -7   48.34   12.34
   5  -7  -6   47.79    5.46
   2   5  -6   64.67   12.63
  -5   7  -6   77.32   16.48
   2   5  -5  157.58   17.23
  -5   7  -5  162.02   20.90
  -2  -5  -4  634.70   41.46
  -2  -5  -4  636.02   35.42
   7  -2  -4  625.56   27.53
  -5   7  -4  622.97   35.81
   7  -2  -3 2565.21   56.35
  -2  -5  -3 2530.31   74.93
  -2  -5  -3 2664.72   70.59
  -2  -5  -2  443.21   27.64
  -2  -5  -1  294.83   19.06
  -7   2   1  311.31   20.89
   2   5   1  326.85   24.31
   2   5   2  465.72   28.75
  -7   2   2  466.66   24.21
   2   5   3 2656.73   78.32
  -2  -5   3 2463.76   51.54
  -5   7   3 2604.84   73.86
  -2  -5   4  596.23   29.66
  -5   7   4  665.06   42.07
   2   5   4  617.97   42.40
  -2  -5   5  158.57   18.18
   2   5   5  156.27   23.85
  -5   7   5  171.66   23.75
  -7   2   5  201.49   24.75
  -5   7   6   71.26   15.63
  -2  -5   6   68.61   13.31
   2   5   6   44.08   11.39
  -7   2   6   84.88   16.59
  -7   2   7   56.68   14.60
   2   5   7   56.55   16.36
  -5   7   7   64.56   17.65
  -2  -5   7   61.06   14.06
  -5   7   8   63.92   16.43
  -2  -5   8   72.87   16.26
   2   5   8   66.86   16.54
  -7   2   8   91.94   20.42
  -2  -5   9   33.30   12.05
  -5   7   9   34.84   15.23
  -7   2   9   51.69   17.75
   2   5   9   23.89   12.20
   2   5  10   -4.42   13.49
  -2  -5  10   -7.16    8.84
  -7   2  10   -7.39    7.75
  -5   7  10   10.85   12.48
  -5   7  11   28.23   16.25
  -2  -5  11   23.85   14.36
  -7   2  11   32.32   15.43
   2   5  11   22.26   15.75
  -2  -5  12   -6.15    8.51
  -5   7  12   23.90   15.13
  -7   2  12   17.67   13.80
   2   5  12  -18.93   17.92
  -7   2  13   10.12   11.48
  -2  -5  13    9.41   11.00
  -5   7  13   -3.33    9.56
   2   5  13   10.37    8.59
   2   5  14   20.52   16.61
  -2  -5  14   29.31   20.12
  -7   2  14   26.84   19.07
  -5   7  14   48.25   24.66
  -2  -5  15   -0.48   11.05
  -5   7  15   18.08   13.83
  -7   2  15   -7.34   10.32
  -2  -5  16    6.02    7.92
  -5   7  16   19.84   17.34
  -7   2  16   15.50   12.22
  -6   7  -9   18.00   11.65
   1   6  -9    5.42    5.03
  -6   7  -8   22.30    9.40
   6  -7  -7   25.03    3.76
   1   6  -7   38.78   10.63
  -6   7  -6   97.08   17.87
   1   6  -6   89.16   14.97
  -6   7  -5  508.04   37.58
   1   6  -5  438.45   28.58
  -1  -6  -5  511.50   32.64
  -1  -6  -5  508.52   40.13
   1   6  -4   88.29   10.68
  -1  -6  -4  117.33   15.02
  -1  -6  -4  101.34   15.70
   7  -1  -3   67.71   11.19
  -1  -6  -3   77.96   12.65
  -1  -6  -3   43.95    9.14
  -1  -6  -2  836.43   37.87
   7  -1  -2  858.44   36.00
  -1  -6  -1 1603.58   43.30
  -1  -6   0 5346.55   59.55
   1   6   1 1663.55   44.69
   1   6   1 1584.26   50.95
  -7   1   1 1572.50   49.42
   1   6   2  854.57   38.86
   1   6   2  849.27   37.89
   1   6   3   51.84   11.06
  -1  -6   3   61.23    7.61
  -6   7   3   64.73   13.05
  -1  -6   4   95.76   11.25
  -6   7   4  101.97   16.64
   1   6   4   97.79   16.91
  -1  -6   5  446.51   29.60
   1   6   5  507.82   41.67
  -6   7   5  513.71   40.41
  -7   1   5  514.16   37.32
  -1  -6   6   96.54   15.72
  -6   7   6  116.12   20.85
   1   6   6   94.74   19.97
  -7   1   6  103.33   18.41
  -7   1   7   50.46   14.14
  -6   7   7   63.52   17.93
   1   6   7   49.91   15.13
  -1  -6   7   48.00   12.47
   1   6   8   21.89   10.15
  -6   7   8   47.14   16.04
  -7   1   8   34.92   12.12
  -1  -6   8   19.71    8.56
  -7   1   9   18.09   12.57
   1   6   9   -7.60   11.51
  -1  -6   9  -15.37   13.59
  -6   7   9   23.17   12.03
  -1  -6  10   15.67   10.31
  -7   1  10    7.51    8.72
   1   6  10   -1.32    7.47
  -1  -6  11   21.90   12.37
  -7   1  11   11.39    9.84
  -6   7  11   22.75   16.80
   1   6  11   27.83   17.59
   1   6  12    1.57    9.31
  -7   1  12    6.53   12.41
  -6   7  12  -18.93   14.98
  -1  -6  12    2.45    8.71
  -1  -6  13    6.28   11.74
  -6   7  13    7.38   12.66
  -7   1  13   -5.87    9.94
   1   6  13    0.89    9.26
  -7   1  14   -7.97   13.21
  -1  -6  14    4.46    8.42
   1   6  14   -3.49    9.62
  -6   7  14    4.19    9.37
   1   6  15    4.21    9.10
  -1  -6  15  -18.05   17.04
  -6   7  15    7.70   15.73
  -7   1  15    3.64    9.94
  -6   7  16   19.42   20.52
  -7   1  16   32.70   21.60
   0   7 -10   34.82   13.45
   0   7  -9    0.83    7.51
  -7   7  -8   74.72   19.20
   0  -7  -7  307.25   36.29
   0   7  -7  283.86   28.50
   0   7  -6   13.49    5.08
   0  -7  -6   15.92    8.78
  -7   7  -6    3.68    5.81
   0   7  -5   24.44    7.44
   0  -7  -5   41.91   10.04
   0  -7  -5    9.50    8.67
  -7   7  -5   33.77   10.69
   0  -7  -4  300.51   23.42
   0  -7  -4  259.62   26.12
   0   7  -4  262.39   18.00
   7   0  -3  102.96   14.20
   0   7  -3   68.05    6.66
   0  -7  -3   81.56   12.62
   7   0  -2   44.94    9.80
   0  -7  -2   20.31    5.58
   0  -7  -1   39.19    5.15
   0  -7   0   48.60    6.17
  -7   0   1   53.68    9.20
   0   7   1   45.50    6.63
   0   7   2   50.31    9.37
   0   7   2   32.77    6.97
   0   7   3   66.04    8.99
   0  -7   3   85.04    8.28
  -7   7   4  313.82   29.27
   0  -7   4  263.66   18.80
   0   7   4  275.67   27.57
  -7   0   5   43.51   12.63
  -7   7   5   39.31   12.73
   0  -7   5   32.45    8.58
   0   7   5   13.85    8.12
  -7   0   6   33.22   11.34
  -7   7   6   29.06   10.80
   0  -7   6   18.11    7.36
   0   7   6   15.01   10.42
  -7   0   7  300.14   33.40
   0   7   7  301.67   37.54
  -7   7   7  314.68   36.69
   0  -7   7  286.26   30.07
  -7   7   8   99.39   23.27
   0  -7   8   56.95   12.77
  -7   0   8   59.08   16.84
   0   7   8   60.03   17.43
  -7   0   9   15.19   11.24
  -7   7   9   -3.47    7.98
   0  -7   9  -12.13   13.48
   0   7   9  -22.37   16.37
   0   7  10   20.65   10.79
  -7   0  10   39.76   14.78
   0  -7  10   18.92    8.79
   0   7  11   11.35   14.89
   0  -7  11    5.72    8.48
  -7   0  11   18.77   16.98
  -7   7  11    4.06   12.16
  -7   7  12  -11.46   13.61
   0  -7  12    2.34    7.86
   0   7  12   -1.06   12.25
  -7   0  12   -6.59    7.65
  -7   0  13   17.59   14.01
  -7   7  13    3.48   11.37
   0  -7  13   12.64   11.92
   0   7  13   -4.52   11.11
   0   7  14   -1.58    8.69
  -7   7  14    8.05   16.02
  -7   0  14   11.20   15.59
  -7   0  15   -1.85   13.53
   0   7  15   11.53   12.93
  -7   7  15   10.30   13.64
  -7   0  16    0.36    9.50
   0   7  16   10.51   14.50
  -7   7  16    9.46   16.12
  -7   0  17   30.17   23.12
  -1   8 -10   -1.26    8.45
  -1   8  -9   40.93    9.75
   1  -8  -9   41.34   11.02
  -8   7  -8  173.63   28.51
   1  -8  -8  166.33   20.25
   1  -8  -7   71.95   12.73
  -8   7  -7   71.32   18.09
  -1   8  -7   51.00   10.52
   1  -8  -7   70.02   18.24
   1  -8  -6  313.38   34.81
   1  -8  -6  292.16   24.17
  -1   8  -6  273.89   25.38
   1  -8  -5  135.28   20.06
   1  -8  -5  164.87   17.44
  -1   8  -5  137.27   15.28
  -1   8  -4  345.06   20.67
   1  -8  -4  400.00   33.23
   1  -8  -3 1429.29   56.42
  -1   8  -3 1233.87   30.94
   7   1  -3 1424.65   52.47
   1  -8  -2   79.13   11.78
   7   1  -2  107.65   16.22
   1  -8  -1  593.71   26.15
   7   1  -1  599.90   34.30
  -1   8   0  260.14   12.96
  -1   8   1  621.57   27.32
  -1   8   2   69.82   11.60
  -1   8   2   82.37   12.39
  -1   8   3 1373.83   46.69
  -1   8   3 1441.35   57.01
  -1   8   4  370.71   32.14
  -8   7   4  378.49   32.16
   1  -8   5  140.02   15.87
  -7  -1   5  169.70   21.26
  -8   7   5  172.05   23.38
  -1   8   5  134.57   19.16
  -7  -1   6  304.86   30.66
   1  -8   6  275.44   26.17
  -1   8   6  313.16   35.08
  -8   7   6  296.96   33.84
  -1   8   7   67.36   17.92
  -8   7   7   93.59   20.21
   1  -8   7   69.07   14.20
  -7  -1   7   87.76   17.65
  -8   7   8  172.93   29.14
  -7  -1   8  179.38   27.45
  -1   8   8  150.21   26.60
   1  -8   8  147.10   23.51
  -7  -1   9   52.44   15.89
  -1   8   9   42.55   12.17
  -8   7   9   73.97   21.14
   1  -8  10   -9.97   14.23
  -7  -1  10   24.38   14.56
  -8   7  10   19.42   12.77
  -1   8  10    5.23    9.50
  -1   8  11    3.19    8.96
   1  -8  11   -6.11   10.80
  -8   7  11   16.64   10.60
  -7  -1  11    2.12    7.22
  -1   8  12    6.44   14.85
  -7  -1  12   16.34   11.34
  -8   7  12    4.55   13.84
  -7  -1  13   16.80   11.72
  -8   7  13    5.86   11.20
  -1   8  13   -2.24   10.47
  -8   7  14   38.93   23.47
  -1   8  14   27.10   22.05
  -7  -1  14   19.54   16.72
  -7  -1  15  -14.20   15.86
  -1   8  15    4.86   11.04
  -8   7  15    2.47   11.12
  -7  -1  16  -16.77   16.92
  -8   7  16    4.32   12.91
  -1   8  16   21.00   17.77
  -7  -1  17   -8.97   10.43
  -2   8  -9   -1.63    9.68
  -8   6  -8   29.23   12.87
   2  -8  -8   42.76   10.11
   2  -8  -7  196.83   28.80
  -8   6  -7  205.23   29.95
  -2   8  -7  173.65   23.10
   2  -8  -7  200.68   19.66
  -2   8  -6  202.64   22.11
   2  -8  -6  193.55   26.76
   2  -8  -6  197.15   18.46
   2  -8  -5  183.48   17.34
   2  -8  -5  165.58   23.33
  -2   8  -5  138.52   16.10
  -2   8  -4   75.30   10.02
   2  -8  -4   78.73   13.81
   2  -8  -3  169.07   18.42
  -2   8  -3  139.09   11.19
   6   2  -2  308.54   25.11
  -2   8  -2  223.00   11.41
   2  -8  -2  300.87   22.49
   6   2  -1 1227.50   49.01
  -2   8   0  848.63   24.69
   6   2   0  833.88   40.54
  -2   8   1 1276.81   39.06
  -2   8   2  311.63   23.29
  -8   6   3  135.46    9.01
  -2   8   3  188.65   16.56
  -2   8   3  145.23   16.63
  -2   8   4   97.56   16.70
  -2   8   5  221.53   28.41
  -6  -2   5  186.57   21.67
  -8   6   5  203.99   26.35
  -6  -2   6  186.86   23.56
  -8   6   6  215.65   27.63
  -2   8   6  200.38   27.71
  -6  -2   7  210.93   27.16
  -8   6   7  218.15   30.61
  -2   8   7  184.99   28.63
  -2   8   8   10.30    8.07
  -6  -2   8   29.97   12.92
  -8   6   8   31.13   13.33
  -6  -2   9    7.83    7.84
  -2   8   9   -3.62   12.84
  -8   6   9   13.05    9.90
  -6  -2  10   38.03   17.13
  -8   6  10   39.99   17.28
  -2   8  10   55.84   20.51
  -2   8  11   52.49   20.04
  -8   6  11   47.71   17.55
  -6  -2  11   37.40   17.69
  -2   8  12   46.53   20.41
  -6  -2  12   27.50   16.87
  -8   6  12   26.97   17.66
  -6  -2  13   17.98   12.47
  -2   8  13   51.57   23.44
  -8   6  13   31.71   19.36
  -6  -2  14   -9.19   14.17
  -2   8  14   26.68   20.40
  -8   6  14   10.29   15.83
  -6  -2  15    5.44   16.84
  -8   6  15   23.31   18.33
  -2   8  15    1.80    9.83
  -6  -2  16    0.57   12.39
  -8   6  16    0.34   13.14
  -2   8  16    1.83   11.17
  -6  -2  17   -7.91   15.78
  -3   8  -9   -6.38    9.77
   3  -8  -8  141.55   15.95
  -8   5  -8  137.55   26.48
  -3   8  -7  293.70   30.48
   3  -8  -7  286.49   21.39
  -8   5  -7  315.57   36.89
   3  -8  -7  311.42   36.93
  -3   8  -6  127.30   18.83
   3  -8  -6  119.57   12.42
   8  -5  -6  105.44    8.93
  -3   8  -5  709.68   38.93
   3  -8  -5  792.60   49.73
  -3   8  -4 1217.63   44.07
   3  -8  -4 1261.88   56.68
   3  -8  -3  468.10   31.05
  -3   8  -3  439.22   23.05
  -5  -3  -3  467.42   33.96
   5   3  -1 1519.48   53.49
   5   3   0   59.12   11.05
  -3   8   1 1529.54   43.66
  -3   8   2 1357.06   49.35
  -3   8   3  483.11   23.47
  -8   5   3  406.78   17.18
  -3   8   3  467.63   32.33
  -3   8   4 1291.78   58.64
  -5  -3   4 1223.38   46.81
  -8   5   5  803.02   49.68
  -5  -3   5  770.94   42.70
  -3   8   5  799.23   51.19
  -8   5   6  146.36   23.76
  -3   8   6  140.77   23.75
  -5  -3   6  118.40   17.63
  -8   5   7  315.54   36.24
  -5  -3   7  319.17   32.85
  -3   8   7  291.56   36.16
  -3   8   8  132.29   26.38
  -5  -3   8  144.32   23.53
  -8   5   8  135.02   25.34
  -5  -3   9    1.93    8.89
  -8   5   9    1.50    7.52
  -3   8   9   -8.07    7.01
  -5  -3  10   46.29   16.15
  -3   8  10   33.42   14.44
  -8   5  10   52.56   19.22
  -5  -3  11    7.85    8.97
  -8   5  11    4.45   11.33
  -3   8  11   15.38   11.13
  -5  -3  12   32.70   16.98
  -3   8  12   28.45   18.44
  -8   5  12   24.97   18.35
  -5  -3  13   10.31   13.66
  -8   5  13    4.05   14.24
  -3   8  13   27.30   18.03
  -8   5  14   14.15   13.10
  -5  -3  14   18.07   13.04
  -3   8  14   12.29   11.34
  -8   5  15    5.10    9.29
  -5  -3  15    7.51   12.22
  -3   8  15    9.35   13.47
  -5  -3  16    6.80    8.63
  -8   5  16    3.88   12.29
  -3   8  16   16.74   15.38
  -5  -3  17   -7.78   15.66
  -4   8  -9  135.06   25.63
   4  -8  -8  119.28   13.10
  -4   8  -7   64.81   15.33
   4  -8  -7   63.45    9.10
  -8   4  -7   76.69   18.68
  -4   8  -6  157.70   20.69
   4  -8  -6  169.77   13.20
  -4   8  -5 1217.89   52.90
   8  -4  -5 1179.12   33.69
   4  -8  -4  758.83   43.33
  -4   8  -4  711.53   35.95
  -4  -4  -4  742.91   46.99
  -4  -4  -3  415.05   31.45
  -4  -4  -2  301.46   24.21
   4   4   0 1269.42   50.40
   4   4   1 1086.40   46.19
  -8   4   2  296.70   18.23
  -4   8   2  316.14   23.21
  -4   8   3  411.84   18.97
  -4   8   3  423.01   30.66
  -4   8   4  785.64   46.92
  -4  -4   4  729.82   35.34
  -4  -4   5 1227.06   52.05
  -4   8   5 1362.85   65.69
  -8   4   5 1265.55   60.63
  -4   8   6  181.90   26.60
  -4  -4   6  189.41   22.63
  -8   4   6  194.41   26.95
   4   4   7   97.28   24.34
  -4  -4   7   83.16   17.62
  -8   4   7   86.85   20.19
  -4   8   7   80.77   19.32
   4   4   8  137.05   25.98
  -4  -4   8  115.45   21.47
  -4   8   8  117.62   24.41
  -8   4   8  135.42   24.53
  -4  -4   9  135.67   25.59
  -8   4   9  163.65   32.09
   4   4   9  142.00   29.75
  -4   8   9  119.52   29.09
  -8   4  10   32.81   16.21
  -4   8  10    5.69    9.20
  -4  -4  10   34.38   15.39
  -4  -4  11   -4.25    8.97
  -8   4  11    2.18   10.04
  -4   8  11   -5.44   12.18
  -4   8  12   33.90   17.74
  -4  -4  12   25.75   15.64
  -8   4  12   18.05   12.84
  -4   8  13   14.03   17.50
  -8   4  13    8.87   13.38
  -4  -4  13   11.41   11.55
  -4  -4  14   -5.01    7.98
  -4   8  14    1.33   12.44
  -4  -4  15   11.76   11.96
  -4   8  15   -1.97    8.92
  -8   4  15    6.00    8.08
  -4   8  16   -3.66   10.66
  -4  -4  16    8.46    8.83
  -8   4  16   14.98   15.24
  -4  -4  17  -11.12   17.00
  -5   8  -9   84.93   21.60
   3   5  -9   66.56   18.03
   5  -8  -9   31.98    6.87
   5  -8  -8   25.33    5.42
   5  -8  -7   13.21    3.79
  -5   8  -6   40.13   11.35
   8  -3  -5  219.43   16.86
  -3  -5  -5  201.27   26.27
  -5   8  -5  225.73   24.54
  -5   8  -4  894.59   42.23
  -3  -5  -4  935.36   51.75
  -3  -5  -4  932.30   46.14
   8  -3  -4  877.28   32.55
  -3  -5  -3  215.82   23.65
  -3  -5  -2  666.16   35.33
  -3  -5  -1 1760.36   49.61
   3   5   0    2.11    3.54
   3   5   1 1885.57   60.37
  -8   3   2  672.60   29.43
  -5   8   2  693.73   34.86
  -3  -5   3  166.51   13.30
  -5   8   3  204.40   23.14
  -5   8   4  980.55   51.80
  -3  -5   4  908.93   38.11
   3   5   4  969.30   53.32
  -3  -5   5  226.33   21.91
  -5   8   5  248.26   30.05
  -8   3   5  263.62   29.12
   3   5   5  241.29   31.55
   3   5   6   26.94   10.23
  -8   3   6   33.78   11.74
  -5   8   6   45.27   13.06
  -3  -5   6   41.01    9.70
  -3  -5   7    6.06    5.67
   3   5   7    7.79    7.75
  -5   8   7   15.66   11.41
  -8   3   7   18.26   10.57
   3   5   8   23.36    8.19
  -8   3   8   34.29   11.25
  -5   8   8   31.51   13.80
  -3  -5   8   29.58   11.33
  -3  -5   9   49.62   18.72
  -8   3   9  115.88   27.53
   3   5   9   70.60   23.29
  -5   8   9   82.21   24.55
   3   5  10    6.00    9.63
  -5   8  10   25.60   15.56
  -8   3  10   22.07   11.42
  -3  -5  10   22.56   12.26
   3   5  11    4.47    8.52
  -8   3  11   21.91   14.74
  -3  -5  11   20.30   10.02
  -5   8  11   25.19   10.69
  -5   8  12   18.17   15.58
  -3  -5  12   16.29   13.50
   3   5  12   -6.82    8.14
  -8   3  12   -3.40   10.22
  -5   8  13   11.12   11.05
  -3  -5  13   -4.66   10.41
  -8   3  13   -2.56    7.97
  -8   3  14   27.61   19.51
  -5   8  14   23.43   19.57
  -3  -5  14    9.09   14.59
  -5   8  15   19.92   22.83
  -3  -5  15    0.54   11.71
  -8   3  15   11.58   12.67
  -8   3  16   14.09   10.19
  -3  -5  16    5.39   10.73
  -3  -5  17   48.11   21.95
   6  -8  -9  145.96   11.70
   2   6  -9  214.24   29.78
  -6   8  -9  241.58   33.79
  -6   8  -8   32.88   12.35
   6  -8  -8   20.86    3.94
   2   6  -7   36.21    9.85
  -2  -6  -7   53.04   16.30
  -6   8  -6   85.66   17.00
  -2  -6  -6   83.94   18.10
   2   6  -6   75.56   12.44
  -2  -6  -5  662.35   40.04
  -6   8  -5  672.93   43.15
  -2  -6  -5  660.57   47.38
  -2  -6  -4   21.56    8.08
   8  -2  -4   32.13    8.18
  -2  -6  -4   12.68    5.44
  -2  -6  -3 1243.65   50.62
  -2  -6  -3 1178.36   51.94
   8  -2  -3 1169.90   41.73
  -2  -6  -2  361.71   25.88
  -2  -6  -1 2475.62   57.16
  -2  -6   0   27.07    4.35
   2   6   1 2573.02   68.92
  -8   2   1 2418.93   62.36
  -8   2   2  345.53   22.61
   2   6   2  380.15   27.58
  -6   8   3 1170.73   50.76
  -2  -6   3 1137.60   33.58
   2   6   3 1146.93   52.29
   2   6   4   17.48    6.24
  -6   8   4   20.61    9.34
  -2  -6   4   16.74    6.22
  -6   8   5  728.66   50.16
  -8   2   5  693.04   44.70
  -2  -6   5  629.25   35.34
   2   6   5  686.75   51.96
  -2  -6   6   77.60   13.66
  -8   2   6   90.40   17.35
  -6   8   6   84.45   15.97
   2   6   6   89.44   18.74
  -2  -6   7   43.88   11.50
   2   6   7   43.63   13.39
  -8   2   7   57.24   14.93
  -6   8   7   61.07   17.13
  -6   8   8   47.76   16.73
   2   6   8   19.69    7.22
  -8   2   8   24.35    8.48
  -2  -6   8   29.01   10.46
  -2  -6   9  246.34   31.90
  -8   2   9  229.85   34.21
   2   6   9  241.48   40.23
  -6   8   9  231.51   36.51
   2   6  10   22.79   14.34
  -2  -6  10   21.11   10.15
  -8   2  10   44.97   18.12
  -6   8  10   27.51   15.29
  -8   2  11   15.54   11.24
  -2  -6  11    1.67    8.35
   2   6  11    8.99   13.19
  -6   8  11   16.44   11.06
  -8   2  12    4.58    8.51
   2   6  12  -10.94   11.58
  -2  -6  12    2.35   10.82
  -6   8  12    1.17    9.42
  -6   8  13   -7.14   12.86
  -8   2  13   15.14   12.38
   2   6  13    2.26   10.37
  -2  -6  13   -9.86   12.85
  -2  -6  14   12.52    8.01
  -8   2  14   13.53   13.57
   2   6  14   39.98   24.60
  -6   8  14   -0.31    8.31
  -6   8  15   27.07   21.98
  -8   2  15   18.21   16.51
  -2  -6  15  -14.49   14.63
  -6   8  16   16.80   22.00
  -8   2  16   -6.67   10.45
   7  -8 -11   37.69    6.20
   7  -8 -10   39.40    5.77
   1   7 -10   65.06   17.64
   1   7  -9   48.80   14.63
  -7   8  -8   82.66   19.47
   1   7  -7   86.25   15.22
  -1  -7  -7  104.24   21.47
   1   7  -6  331.60   26.45
  -1  -7  -6  405.11   39.33
  -7   8  -6  294.79   31.81
  -1  -7  -6  355.67   29.42
  -1  -7  -5  115.60   18.65
   1   7  -5  105.96   14.16
  -1  -7  -5  136.56   18.75
  -7   8  -5  134.84   20.11
  -1  -7  -4  399.09   33.62
   8  -1  -4  386.20   26.00
  -1  -7  -4  416.45   29.94
  -1  -7  -3  175.91   19.09
  -1  -7  -3  154.28   18.43
   8  -1  -3  171.93   18.15
  -1  -7  -2  493.15   29.95
   8  -1  -2  512.00   29.61
  -1  -7  -1  598.98   27.48
  -1  -7   0  835.92   24.57
   1   7   1  633.47   34.45
  -8   1   1  606.75   33.62
   1   7   2  508.29   30.82
  -8   1   2  507.95   28.97
   1   7   2  519.25   31.05
   1   7   3  147.17   18.42
  -1  -7   3  130.33   10.18
   1   7   4  355.03   31.95
  -1  -7   4  335.41   20.93
  -7   8   4  382.47   32.87
  -7   8   5  128.72   23.24
   1   7   5   93.03   17.62
  -1  -7   5   79.93   10.99
  -8   1   5  129.68   20.38
  -1  -7   6  370.07   30.24
   1   7   6  346.28   37.44
  -7   8   6  377.96   37.75
  -8   1   6  349.64   34.39
   1   7   7   92.37   19.62
  -8   1   7  103.72   20.04
  -7   8   7  101.99   21.60
  -1  -7   7  104.78   18.71
  -8   1   8   83.68   18.76
   1   7   8   65.55   18.23
  -1  -7   8   79.25   16.73
  -7   8   8   98.40   22.53
  -7   8   9   70.85   20.81
   1   7   9   27.19   11.86
  -1  -7   9   27.79    9.42
  -8   1   9   46.82   16.57
  -1  -7  10   56.28   17.69
   1   7  10   37.53   16.24
  -7   8  10   91.79   25.36
  -8   1  10  107.43   25.21
   1   7  11   49.96   21.50
  -1  -7  11   52.94   17.98
  -8   1  11   86.10   22.90
  -7   8  11   79.88   25.70
  -1  -7  12    1.87    9.67
  -7   8  12   13.71    9.75
  -8   1  12   -8.08    8.90
   1   7  12   -9.30   12.74
  -8   1  13   -2.44    8.11
   1   7  13   11.27   16.23
  -7   8  13   -4.11    8.44
  -1  -7  13   -3.31   10.25
  -1  -7  14    0.76    7.81
  -8   1  14   -3.02    7.71
  -7   8  14   11.97   13.22
   1   7  14   -3.34   10.58
  -8   1  15  -16.79   15.21
   1   7  15   -3.80    9.46
  -7   8  15   -4.54   14.11
  -8   1  16    3.05    9.39
  -7   8  16   26.46   23.63
   0   8 -10   60.48   16.09
   0   8  -9   11.19    6.81
   0  -8  -9   14.81    6.40
  -8   8  -8   15.20   10.54
   0  -8  -8   10.69    7.40
   0   8  -7   53.32   12.28
   0  -8  -7   68.11   13.72
   0  -8  -7   56.65   16.54
   0  -8  -6    4.77    6.05
   0  -8  -6   19.09    7.16
   0   8  -6    3.97    3.48
   0  -8  -5   61.93   12.25
   0   8  -5   54.61   10.05
   0  -8  -5   45.71   10.73
   0  -8  -4  396.60   33.19
   8   0  -4  395.68   27.59
   0  -8  -4  418.70   28.76
   0   8  -4  369.89   20.37
   0  -8  -3  857.11   44.22
   8   0  -3  892.33   42.62
   8   0  -2   57.64   11.12
   0  -8  -2   39.69    7.69
   0  -8  -1  566.98   26.43
   0  -8   0   20.62    3.69
   0   8   1  563.90   26.72
  -8   0   1  565.15   33.89
   0   8   2   30.75    4.98
   0   8   2   66.09   11.30
   0   8   3  809.94   43.60
   0   8   3  796.53   38.46
  -8   8   4  385.33   32.44
   0   8   4  423.82   35.80
   0  -8   4  375.32   21.94
  -8   0   5   71.38   15.67
   0   8   5   41.79    9.90
  -8   8   5   79.58   17.99
   0  -8   5   71.46   12.94
   0  -8   6    4.49    6.22
  -8   8   6   10.50    6.88
  -8   0   6   11.89    8.40
   0   8   6   16.63    9.85
   0   8   7   68.94   18.81
  -8   0   7   73.03   16.39
   0  -8   7   48.59   12.84
  -8   8   7   63.73   17.96
  -8   0   8   -8.07    9.17
   0   8   8   -1.00   10.55
   0  -8   8  -12.99    9.82
  -8   8   8    0.97    6.55
   0  -8   9   11.07    6.47
   0   8   9   -6.70   11.49
  -8   8   9   13.73    9.04
  -8   0   9   22.14   10.00
   0   8  10   41.47   16.04
  -8   8  10   97.32   25.70
  -8   0  10   78.24   22.91
   0  -8  10   66.01   18.21
  -8   0  11   47.69   19.21
  -8   8  11   58.15   21.91
   0  -8  11   21.77   10.73
   0   8  11   32.16   19.35
   0   8  12    9.28   11.70
  -8   0  12   27.16   15.23
   0  -8  12    8.19   10.35
  -8   8  12   19.29   10.70
  -8   8  13   -5.75   12.15
  -8   0  13   26.66   18.66
   0   8  13    9.68   14.27
  -8   0  14   40.67   20.44
   0   8  14   19.59   17.90
  -8   8  14  -10.88   12.56
  -8   0  15  -23.26   17.80
  -8   8  15   -2.99   11.39
   0   8  15    6.83   12.18
  -8   0  16   -6.28   12.65
  -8   8  16   -0.40   13.19
   0   8  16    4.68    9.34
   1  -9 -10   47.07   11.99
  -1   9 -10   32.81   11.59
   1  -9  -9    1.48    4.10
  -9   8  -8   23.20    9.61
   1  -9  -8   19.37    7.08
   1  -9  -7    6.85    5.57
  -9   8  -7   27.53   11.62
   1  -9  -7   17.41    6.40
  -1   9  -7   11.91    5.21
   1  -9  -6   32.41   12.13
   1  -9  -6   26.53    7.71
  -1   9  -6    9.41    3.61
  -1   9  -5   51.66    8.95
   1  -9  -5   42.18   11.68
  -1   9  -4    5.34    2.68
   1  -9  -4   -5.60    8.11
   8   1  -3  154.93   18.67
   1  -9  -3  137.40   17.54
  -1   9  -3   92.44    7.52
   8   1  -2 1336.85   54.81
   1  -9  -2 1337.92   48.55
   1  -9  -1   86.58   10.27
   8   1  -1   88.70   14.39
  -1   9   0  880.94   26.04
  -8  -1   1   93.72   14.12
  -1   9   1   91.64   10.67
  -1   9   2 1390.12   50.59
  -1   9   2 1300.09   48.97
  -1   9   3  135.87   18.06
  -1   9   3  175.53   19.62
  -1   9   4   -0.43    7.09
  -9   8   5   66.40   16.40
  -8  -1   5   63.80   14.18
  -1   9   5   36.17    9.64
  -9   8   6   30.96   12.26
  -8  -1   6   38.76   12.44
  -1   9   6   26.07    9.99
  -1   9   7   13.78    6.58
  -9   8   7   17.11    7.22
  -8  -1   7    7.20    6.57
   1  -9   7   10.67    6.01
   1  -9   8   26.73   11.01
  -9   8   8   18.39   11.07
  -1   9   8   31.99   14.67
  -8  -1   8   15.16    7.66
  -9   8   9   -4.57   10.64
   1  -9   9   -1.67    8.72
  -1   9   9  -17.08   15.29
  -8  -1   9   -4.30    7.66
  -1   9  10   42.22   17.14
  -9   8  10   61.36   19.88
  -8  -1  10   55.21   19.03
  -8  -1  11    9.27    6.84
  -1   9  11   -3.30   10.12
  -9   8  11   16.63   13.57
  -1   9  12   35.01   18.32
  -8  -1  12   43.37   18.57
  -9   8  12   34.15   17.96
  -8  -1  13   10.85    9.65
  -1   9  13   50.74   25.59
  -9   8  13   15.76   15.72
  -9   8  14   41.23   22.66
  -1   9  14   17.05   15.87
  -8  -1  14   -3.50   11.82
  -9   8  15    9.47   10.51
  -1   9  15   34.05   18.12
  -9   8  16   21.93   16.02
  -8  -1  16    3.84   10.15
  -8  -1  17  -25.35   18.36
   2  -9 -11   14.12    7.60
   9  -7 -10    8.59    2.31
   2  -9 -10   19.53    8.62
  -2   9 -10    0.43   10.16
  -2   9  -9   -4.30    8.09
   2  -9  -9   13.92    7.60
  -9   7  -8   36.12   13.96
   2  -9  -8   23.57    8.20
   2  -9  -7    6.86    3.87
  -9   7  -7   14.58    7.07
  -2   9  -7   -4.06    6.13
   2  -9  -7   -2.57    7.15
   2  -9  -6   83.01   12.86
   2  -9  -6   99.05   19.33
  -2   9  -6   71.32   13.12
  -2   9  -5   29.31    7.72
   2  -9  -5   38.95   11.66
  -2   9  -4   15.99    5.61
   2  -9  -4    7.04    4.16
   2  -9  -3  227.84   21.47
  -2   9  -3  219.05   13.35
   2  -9  -2 1090.42   42.59
   7   2  -2 1197.99   52.16
   7   2  -1  281.76   24.89
  -2   9   0 1437.21   33.98
  -2   9   1  293.84   19.33
  -2   9   2 1140.48   44.73
  -2   9   3  229.58   21.97
  -2   9   3  277.39   20.91
  -2   9   4   14.89    6.85
  -2   9   5   35.53   12.08
  -7  -2   5   31.73   10.65
  -7  -2   6  101.53   18.09
  -2   9   6   81.77   17.68
  -9   7   6  112.36   22.80
  -7  -2   7   12.32    6.59
  -2   9   7    3.81    5.46
  -9   7   7    5.19    7.68
  -2   9   8   22.01   11.43
  -9   7   8   36.01   15.48
  -7  -2   8   35.24   12.39
  -2   9   9  -14.38   14.26
  -7  -2   9   -5.04    5.66
  -9   7   9   16.49    9.77
  -2   9  10   19.80   11.83
  -7  -2  10   24.92   15.84
  -9   7  10   37.99   17.10
  -2   9  11   -6.73   13.80
  -9   7  11   -2.54    7.63
  -7  -2  11    4.54    9.11
  -9   7  12   12.07   13.10
  -2   9  12   19.86   17.40
  -7  -2  12   15.98   12.79
  -2   9  13   26.64   21.81
  -7  -2  13   15.53   15.31
  -9   7  13    1.17   10.02
  -9   7  14   34.24   24.63
  -2   9  14   24.07   21.57
  -7  -2  14    6.38   10.48
  -9   7  15  -13.10   13.69
  -2   9  15   -6.52   16.63
  -7  -2  15  -13.03   11.92
  -7  -2  16   -2.12   13.98
  -9   7  16   10.37   14.80
  -2   9  16  -13.14   13.12
  -7  -2  17   17.74   18.61
   3  -9 -11   14.03    6.92
   3  -9 -10   94.79   14.70
   3  -9  -9   36.46    9.10
  -3   9  -9   44.67   11.92
   3  -9  -8    5.39    2.96
   9  -6  -8    0.87    1.50
  -9   6  -7   69.16   18.55
   3  -9  -7   50.83    8.76
  -3   9  -7   73.59   15.62
   3  -9  -7   68.58   17.47
   3  -9  -6    8.53    6.77
  -3   9  -6   19.59    8.13
  -3   9  -5  436.68   30.09
   3  -9  -5  508.40   41.01
  -3   9  -4  576.66   29.39
   3  -9  -4  621.28   40.50
  -6  -3  -4  607.60   44.25
  -3   9  -3 1214.81   35.93
   3  -9  -3 1214.18   50.50
   6   3  -2 1143.86   50.42
   6   3  -1  565.07   35.57
   6   3   0  477.59   32.87
  -3   9   0  458.62   19.52
  -3   9   1  544.25   26.51
  -3   9   2 1191.66   47.25
  -3   9   3 1303.78   53.77
  -9   6   3 1121.17   30.94
  -3   9   3 1313.63   42.43
  -3   9   4  628.16   41.97
  -9   6   5  501.61   40.84
  -6  -3   5  456.18   33.18
  -3   9   5  479.71   40.76
  -6  -3   6    7.09    6.16
  -3   9   6   -0.12    5.81
  -9   6   6   12.06    9.32
  -9   6   7   68.12   18.36
  -3   9   7   51.26   16.59
  -6  -3   7   69.96   16.69
  -9   6   8    7.12    8.10
  -3   9   8   -5.04    9.87
  -6  -3   8   13.25    9.65
  -3   9   9   18.45   13.72
  -6  -3   9   37.63   13.11
  -9   6   9   29.65    9.94
  -3   9  10  102.81   25.11
  -6  -3  10   96.01   23.24
  -9   6  10  114.02   26.54
  -3   9  11    3.49    9.46
  -9   6  11   -0.20    9.53
  -6  -3  11    9.23   10.13
  -3   9  12   -2.71    8.99
  -6  -3  12   18.23   16.90
  -9   6  12    9.78   10.21
  -3   9  13    7.88   16.49
  -9   6  13   13.34   17.36
  -6  -3  13  -10.40    8.88
  -6  -3  14   24.76   15.74
  -9   6  14   -3.01   12.00
  -3   9  14   19.44   17.49
  -6  -3  15    9.62   12.41
  -3   9  15   11.88   16.02
  -9   6  15   26.32   17.84
  -9   6  16  -10.25   13.38
  -3   9  16   -0.56   12.81
  -6  -3  16   10.47   10.77
  -6  -3  17   17.15   16.09
   4  -9 -11   16.10    6.51
   4  -9 -10    6.22    4.58
  -4   9  -9   58.52   17.02
   4  -9  -9   60.57   10.43
   4  -9  -8   22.12    6.24
  -9   5  -7  280.03   35.66
   9  -5  -7  222.72   14.86
  -5  -4  -7  269.26   35.45
   4  -9  -7  279.42   34.38
  -4   9  -7  244.85   28.08
   9  -5  -6   10.77    3.30
  -4   9  -6    7.47    4.16
   4  -9  -6   25.90   11.46
   4  -9  -5  321.81   31.64
  -5  -4  -5  299.30   33.55
  -4   9  -5  274.52   24.88
  -5  -4  -4  268.65   28.63
   4  -9  -4  311.13   28.60
  -4   9  -4  275.97   21.80
  -5  -4  -3  157.36   21.88
   5   4  -1  428.43   30.20
   5   4   0  977.44   47.27
   5   4   1  435.92   30.43
  -4   9   1  448.49   24.63
  -4   9   2  755.05   37.64
  -4   9   3  164.22   21.37
  -9   5   3  109.77   10.74
  -4   9   3  154.66   14.34
  -4   9   4  312.47   30.03
  -5  -4   4  285.26   22.70
  -9   5   5  310.36   32.13
  -4   9   5  334.51   33.53
  -5  -4   5  285.14   25.80
  -9   5   6   12.59    7.43
  -5  -4   6   15.73    7.63
  -4   9   6   13.18    8.61
  -9   5   7  277.17   35.16
  -5  -4   7  290.43   30.97
  -4   9   7  270.60   34.39
  -5  -4   8   31.69   13.22
  -4   9   8   36.42   14.35
  -9   5   8   14.45   10.53
  -4   9   9   61.13   21.01
  -9   5   9   55.98   19.18
  -5  -4   9   53.26   15.70
  -4   9  10   26.89   13.40
  -5  -4  10   19.25   12.04
  -9   5  10   14.88   12.76
  -9   5  11   17.70   10.50
  -5  -4  11   26.59   16.49
  -4   9  11   15.17   13.36
  -4   9  12   39.78   21.14
  -5  -4  12   22.94   16.11
  -9   5  12   40.84   17.83
  -9   5  13   17.09   12.96
  -4   9  13   20.82   13.79
  -5  -4  13    1.64    9.42
  -4   9  14   16.42   16.35
  -5  -4  14   19.26   12.42
  -9   5  14  -19.33   13.57
  -5  -4  15    1.48    9.23
  -9   5  15  -11.23    9.69
  -4   9  15   -0.62   13.45
  -4   9  16   27.92   23.03
  -5  -4  16   16.52   15.01
  -9   5  16    3.76   11.54
  -5  -4  17   -5.01   17.48
   5  -9 -11   16.50    5.33
   5  -9 -10   39.48    7.70
  -5   9  -9  428.05   43.54
   5  -9  -9  343.51   21.57
   5  -9  -8    6.84    3.10
   5  -9  -7   47.19   14.11
  -4  -5  -7   40.22   14.37
  -5   9  -7   13.66    8.30
  -4  -5  -6   10.41    6.78
   9  -4  -6   19.78    5.67
   5  -9  -6   13.74    8.32
  -5   9  -6   11.02    5.52
  -4  -5  -5   81.99   18.33
  -5   9  -5   71.36   14.22
   9  -4  -5   72.03    9.85
  -4  -5  -4  256.48   27.57
  -4  -5  -4  251.47   25.11
  -5   9  -4  246.81   21.65
  -4  -5  -3   10.91    6.81
  -4  -5  -2  259.73   23.55
   4   5   0 1135.29   49.90
   4   5   1 1364.36   54.63
  -9   4   2  262.29   19.65
  -5   9   2  270.71   22.75
  -5   9   3   15.27    8.72
  -5   9   4  260.45   27.05
  -4  -5   4  238.85   19.97
  -5   9   5   82.04   18.07
  -4  -5   5   83.80   14.68
  -9   4   5   97.68   18.89
  -9   4   6   15.71    7.76
  -4  -5   6   25.51    9.73
  -5   9   6   26.33   12.35
  -4  -5   7   55.05   14.85
  -9   4   7   57.53   15.69
  -5   9   7   48.84   14.73
   4   5   8    5.73    6.06
  -5   9   8    3.98    7.07
  -4  -5   8   13.27    8.33
  -9   4   8   20.88    9.93
  -5   9   9  480.64   53.75
  -4  -5   9  451.19   44.30
  -9   4   9  458.40   50.45
  -5   9  10   47.41   17.51
  -4  -5  10   48.92   16.19
  -9   4  10   62.14   20.68
  -4  -5  11    3.50    7.67
  -5   9  11   15.98   12.26
  -4  -5  12   22.20   14.73
  -5   9  12   16.97   16.23
  -9   4  12   28.01   12.59
  -5   9  13   25.54   19.42
  -9   4  13   35.44   19.01
  -4  -5  13   23.49   15.37
  -9   4  14   16.70   12.38
  -4  -5  14   -0.59   10.93
  -5   9  14   21.91   16.61
  -9   4  15    5.99    8.70
  -5   9  15   11.51   17.80
  -4  -5  15   35.22   16.14
  -9   4  16   -2.78   12.25
  -5   9  16  -12.03   11.60
  -4  -5  16    0.52   10.49
  -4  -5  17   -7.48   14.73
   6  -9 -11   17.97    5.00
   6  -9 -10   86.42    9.71
  -6   9  -9  119.03   24.52
   6  -9  -9   72.82    7.96
  -6   9  -8  105.35   22.22
  -3  -6  -7    2.86    4.65
  -6   9  -6   32.94   10.08
   9  -3  -6   36.44    8.12
  -3  -6  -6   29.47   12.81
   9  -3  -5  763.38   33.98
  -6   9  -5  769.26   44.90
  -3  -6  -5  752.46   44.81
  -3  -6  -5  827.59   53.72
   9  -3  -4  139.55   14.23
  -3  -6  -4  140.08   19.60
  -3  -6  -4  146.48   19.05
  -3  -6  -3  295.02   27.45
  -3  -6  -3  248.06   24.66
  -3  -6  -2  737.43   38.34
  -3  -6  -1  682.25   32.34
   3   6   0  546.36   33.79
   3   6   1  721.39   39.68
   3   6   2  743.76   40.49
  -9   3   2  762.68   34.50
  -3  -6   3  258.57   16.39
  -6   9   3  265.74   25.00
  -6   9   4  144.80   20.02
  -3  -6   4  130.85   13.59
  -6   9   5  818.07   53.24
  -3  -6   5  732.55   37.80
   3   6   5  822.21   55.36
   3   6   6   18.02    5.98
  -3  -6   6   35.03    8.69
  -9   3   6   40.66   13.37
  -6   9   6   14.55    7.83
   3   6   7    0.39    8.83
  -9   3   7   19.89   11.25
  -3  -6   7    3.34    5.00
  -6   9   7   27.15   12.81
  -9   3   8  106.33   22.31
  -3  -6   8  102.13   18.83
   3   6   8   81.36   20.87
  -6   9   8  125.49   26.55
  -9   3   9  124.03   26.17
  -3  -6   9  129.68   24.33
   3   6   9   96.75   26.26
  -6   9   9  129.14   31.21
  -9   3  10  159.40   30.44
  -6   9  10  136.83   31.48
  -3  -6  10  130.15   25.10
   3   6  10  106.09   26.41
  -3  -6  11   17.89   12.55
   3   6  11   17.00   13.91
  -6   9  11   20.77   12.77
  -9   3  11   38.74   18.87
  -6   9  12   30.48   15.52
  -3  -6  12    1.69   10.06
  -9   3  12   12.50   12.78
   3   6  12    8.87   11.41
  -9   3  13   -9.09    9.50
  -6   9  13   10.26    9.93
  -3  -6  13    2.52   11.63
  -6   9  14   -0.10    9.46
  -3  -6  14    3.92   11.57
  -9   3  14   10.34   17.09
  -9   3  15   -6.15   12.67
  -6   9  15   11.60   18.02
  -3  -6  15   13.95   10.74
  -6   9  16  -18.17   17.47
  -9   3  16  -16.69   13.56
  -3  -6  16   -3.44   12.30
   7  -9 -11   10.27    2.47
   2   7 -10   36.09   12.59
   2   7  -9   37.20   13.32
  -7   9  -9   37.20   15.56
  -7   9  -8   67.81   16.62
  -2  -7  -7   58.48   17.08
  -2  -7  -7   42.28   11.68
  -2  -7  -6  160.98   25.93
  -7   9  -6  132.13   20.60
  -2  -7  -6  139.75   19.19
  -7   9  -5 1089.54   54.49
  -2  -7  -5 1164.23   62.89
  -2  -7  -5 1151.64   54.23
   9  -2  -5 1110.01   44.13
   9  -2  -4  699.17   35.12
  -2  -7  -4  737.02   42.28
  -2  -7  -4  724.35   46.73
  -2  -7  -3   60.49   10.76
  -2  -7  -3   91.34   14.74
   9  -2  -3   75.96   11.89
  -2  -7  -2    1.88    3.80
  -2  -7  -1  338.15   21.88
  -2  -7   0  639.73   24.49
  -9   2   1  362.00   26.84
   2   7   1  338.08   26.71
  -9   2   2   10.31    4.60
  -2  -7   2    7.00    2.48
   2   7   2   14.23    7.54
  -2  -7   3   64.93    7.52
   2   7   3   65.56   10.64
  -7   9   3   79.67   14.51
  -2  -7   4  671.87   29.81
   2   7   4  733.95   47.46
  -7   9   4  739.79   45.48
  -7   9   5 1163.77   63.68
  -2  -7   5 1085.94   45.09
   2   7   5 1196.14   66.12
  -7   9   6  134.33   22.54
  -2  -7   6  119.55   16.79
   2   7   6  137.63   24.36
  -9   2   6  154.17   22.69
  -7   9   7   48.06   14.09
  -9   2   7   56.89   15.76
   2   7   7   40.20   15.11
  -2  -7   7   39.66   11.79
  -2  -7   8   71.37   15.98
  -7   9   8   72.30   18.75
  -9   2   8   80.72   18.37
   2   7   8   76.54   20.45
  -7   9   9   26.58   14.90
  -9   2   9   26.74   10.32
  -2  -7   9   52.85   15.26
   2   7   9    9.93    7.74
   2   7  10   24.14   10.73
  -2  -7  10   20.09   10.50
  -7   9  10   48.43   19.10
  -9   2  10   51.09   18.17
  -2  -7  11   -2.59    9.97
  -9   2  11   45.61   18.48
  -7   9  11   32.88   16.97
   2   7  11    2.01    8.76
   2   7  12   13.42   13.50
  -7   9  12   -4.48    8.78
  -2  -7  12    9.29    9.17
  -9   2  12   -9.46   11.98
  -7   9  13    9.57   10.52
   2   7  13  -17.31   19.63
  -9   2  13    4.89    8.92
  -2  -7  13   -5.07    9.53
  -2  -7  14  -10.14   10.65
  -7   9  14   12.72   13.28
  -9   2  14   -1.17    9.37
  -2  -7  15   32.87   19.58
  -9   2  15   24.30   18.37
  -7   9  15   -6.44   11.27
  -9   2  16    3.17   14.27
  -7   9  16   24.85   16.82
   1   8 -10   87.83   19.91
  -8   9  -8   18.74    8.35
  -1  -8  -8   27.03   10.01
   1   8  -7  135.22   19.05
  -1  -8  -7  152.58   20.73
  -1  -8  -7  139.89   26.74
  -1  -8  -6   64.46   16.65
  -1  -8  -6   63.29   12.78
   1   8  -6   62.29   11.91
  -1  -8  -5  108.24   17.20
   9  -1  -5   84.76   13.21
  -1  -8  -5   83.28   16.67
  -1  -8  -4  106.04   15.06
   9  -1  -4  103.61   14.27
  -1  -8  -4   96.73   16.54
  -1  -8  -3  865.18   44.75
   9  -1  -3  873.05   41.34
  -1  -8  -2    4.14    3.29
  -1  -8  -1  354.98   21.56
  -1  -8   0  424.99   18.09
  -9   1   1  353.48   27.61
   1   8   2    5.78    3.39
  -9   1   2    6.01    3.40
   1   8   2   13.38    7.42
  -1  -8   3  743.36   23.08
   1   8   3  835.29   41.96
   1   8   3  914.50   47.21
  -1  -8   4  111.83   10.94
   1   8   4  117.83   18.89
  -8   9   4  129.92   19.30
   1   8   5   73.52   15.36
  -1  -8   5   64.43    9.07
  -8   9   5  104.97   20.61
  -8   9   6   66.96   16.83
  -9   1   6   78.00   17.19
   1   8   6   58.02   15.30
  -1  -8   6   52.94   11.01
  -9   1   7  155.13   24.67
  -8   9   7  126.16   23.56
   1   8   7  132.43   25.67
  -1  -8   7  130.84   20.05
  -8   9   8   27.55   12.80
  -1  -8   8   25.80    9.80
  -9   1   8   15.15    6.44
   1   8   8   15.35    7.51
   1   8   9   18.82   10.34
  -8   9   9   38.40   14.96
  -9   1   9    8.81    6.99
  -1  -8   9   14.37    7.21
   1   8  10   74.07   21.59
  -8   9  10  112.54   27.32
  -9   1  10  104.83   23.89
  -1  -8  10   89.36   20.46
   1   8  11   15.55   12.43
  -8   9  11   37.36   18.10
  -1  -8  11    8.98    8.63
  -9   1  11    9.99    9.42
  -9   1  12   16.17   12.70
  -1  -8  12  -14.52   10.75
  -8   9  12   22.06   17.14
   1   8  12  -15.67   13.89
   1   8  13   20.80   12.07
  -8   9  13   13.14   16.33
  -9   1  13    1.38    8.58
  -1  -8  13  -10.28    8.45
  -1  -8  14   -5.24    7.92
  -8   9  14    3.00    9.56
   1   8  14    7.40   11.25
  -9   1  14   10.85   11.32
  -8   9  15   -8.98   10.46
  -9   1  15  -19.64   15.36
   1   8  15   -2.41   12.56
  -9   1  16   -0.22   12.46
  -8   9  16    1.14    8.98
   0   9 -10   12.80    8.39
   0  -9  -9   -1.14    4.20
   0  -9  -8    4.13    5.43
   0   9  -8    0.78    2.80
  -9   9  -8   -3.58    9.02
   0  -9  -7  157.24   20.58
   0  -9  -7  151.39   26.30
   0   9  -7  126.05   18.43
  -9   9  -7  143.47   25.03
   0  -9  -6  140.48   19.07
   0   9  -6  132.13   16.71
   0  -9  -6  119.06   22.32
   0   9  -5    3.03    3.20
   0  -9  -5    6.29    4.06
   9   0  -5    4.90    3.98
   0  -9  -5    7.91    4.84
   0  -9  -4   -4.26    8.19
   9   0  -4    4.41    6.90
   9   0  -3  879.15   44.47
   0  -9  -3  895.85   46.98
   0  -9  -2  259.08   21.43
   9   0  -2  244.00   22.74
   0  -9  -1  465.63   24.26
   0  -9   0 1124.75   28.51
  -9   0   1  510.71   34.21
   0   9   1  507.67   26.38
   0   9   2  282.38   23.12
   0   9   2  271.57   24.31
   0   9   3  839.52   41.85
   0   9   3  897.39   47.40
  -9   9   4    1.73    4.01
   0   9   4   -8.03    9.15
  -9   9   5    4.13    4.81
   0   9   5    5.17    7.39
   0  -9   5    1.26    3.89
  -9   9   6  167.05   27.11
   0   9   6  135.72   24.40
  -9   0   6  154.83   23.39
   0  -9   6  119.57   17.45
   0   9   7  154.25   27.18
  -9   9   7  130.65   24.74
   0  -9   7  136.28   19.85
  -9   0   7  169.11   25.39
   0  -9   8   -9.27    9.77
  -9   0   8   -7.02    7.32
  -9   9   8   -5.23   11.50
   0   9   8  -12.82   11.86
   0   9   9    4.69   10.11
  -9   0   9   -4.70   10.76
  -9   9   9   12.95    9.61
   0  -9   9    0.57    5.25
  -9   0  10   34.96   16.24
  -9   9  10   39.25   18.11
   0   9  10   14.32   13.12
   0  -9  10   20.82   11.00
  -9   9  11   -8.23   12.38
   0   9  11   18.78   13.56
   0  -9  11    0.68    7.92
  -9   0  11   -1.88    7.38
  -9   9  12    8.52   12.95
  -9   0  12   -6.01    8.74
   0   9  12   -1.62   11.59
  -9   0  13   28.59   18.46
  -9   9  13   11.67   15.11
   0   9  13    6.18   10.93
  -9   9  14   14.51   13.27
   0   9  14    2.20    9.44
  -9   0  14   16.31   12.22
   0   9  15    2.30   12.52
  -9   9  15    1.96    9.39
  -9   0  15   -7.69   11.03
  -9   0  16   -8.12   11.50
   1 -10 -10   19.14    8.40
  -1  10 -10   17.87    8.67
   1 -10  -9   55.07   12.91
  -1  10  -8   21.55   10.06
   1 -10  -8   41.15   10.95
   1 -10  -7  128.77   23.78
   1 -10  -7  129.07   17.41
  -1  10  -7  119.16   17.57
 -10   9  -7  107.85   22.41
  -1  10  -6   32.06    7.60
   1 -10  -6   26.05    9.23
   1 -10  -5  139.59   21.95
  -1  10  -5  112.68   13.13
   1 -10  -4  172.02   22.66
  -1  10  -4  153.25   12.25
   9   1  -4  167.83   19.75
   9   1  -3  343.29   29.24
   1 -10  -3  324.14   27.65
   9   1  -2 1102.24   52.49
   1 -10  -2 1100.65   45.15
   1 -10  -1  713.86   29.70
  -1  10   0   56.17    6.55
  -9  -1   1  742.05   42.60
  -1  10   1  772.23   33.03
  -1  10   2 1202.48   48.76
  -1  10   2 1050.97   46.66
  -1  10   3  311.98   26.00
  -1  10   3  311.03   28.45
  -1  10   4  184.30   23.93
 -10   9   5  135.07   22.19
  -1  10   5  137.68   22.58
 -10   9   6   31.83   11.32
  -9  -1   6   33.03   10.69
  -1  10   6   20.05   10.43
  -9  -1   7  103.46   19.36
 -10   9   7  120.25   23.44
  -1  10   7  105.94   22.84
 -10   9   8   42.57   15.42
  -9  -1   8   40.32   13.78
  -1  10   8   41.70   14.88
  -1  10   9   32.40   15.03
  -9  -1   9   27.57   11.21
 -10   9   9   20.47    9.92
  -1  10  10   27.47   16.76
  -9  -1  10   21.66   11.84
 -10   9  10   38.27   15.91
 -10   9  11    2.13    8.66
  -1  10  11    8.47    8.39
  -9  -1  11   -1.49    8.57
  -9  -1  12    4.62   10.31
  -1  10  12   10.98   11.20
 -10   9  12   16.39   14.09
 -10   9  13   12.26   15.52
  -9  -1  13    6.44   10.74
  -1  10  13   26.77   17.24
 -10   9  14   -0.58   16.09
  -9  -1  14    8.41   14.36
  -1  10  14   10.78   16.31
  -1  10  15   -0.95   13.04
  -9  -1  15   -1.72   11.40
 -10   9  15   -4.41   12.55
  -9  -1  16  -19.37   18.82
   2 -10 -11   15.48    7.99
  -2  10 -10    2.59    5.51
   2 -10 -10    4.90    4.10
   2 -10  -9   11.72    6.41
  -2  10  -8   -3.90    4.60
   2 -10  -8   13.47    7.08
   2 -10  -7   34.29    8.97
 -10   8  -7   27.99   10.73
  -2  10  -7   23.37    5.33
   2 -10  -7   32.87   11.89
   2 -10  -6   17.46    6.56
  -2  10  -6   13.36    4.02
   2 -10  -5   79.71   16.47
  -2  10  -5   62.45   10.34
  -2  10  -4   60.03    8.86
   2 -10  -4   64.20   13.34
   2 -10  -3   90.31   13.78
  -2  10  -3   78.35    7.34
   8   2  -3   90.92   14.15
   2 -10  -2   16.37    4.11
   8   2  -2   40.05   11.78
   8   2  -1  196.43   21.89
  -2  10   0  104.91    9.64
  -2  10   1  192.83   15.95
  -2  10   2   18.54    5.07
  -2  10   3   82.41   13.77
  -2  10   3   98.90   14.14
  -2  10   4   68.69   14.58
  -8  -2   5   60.81   12.94
  -2  10   5   74.49   17.34
 -10   8   5   79.91   17.31
  -8  -2   6   40.23   12.19
  -2  10   6   25.13    9.16
 -10   8   6   31.69   11.60
  -2  10   7   21.31    6.76
  -8  -2   7   33.60   11.44
 -10   8   7   24.80   12.48
  -2  10   8   -3.02   10.86
 -10   8   8   -3.13   10.34
  -8  -2   8   -7.49    8.00
 -10   8   9    0.42    9.30
  -2  10   9    3.66    7.34
 -10   8  10   14.73    9.43
  -2  10  10    6.49    7.16
  -8  -2  10   25.86   14.98
  -2  10  11   12.37   11.13
 -10   8  11    9.33   11.47
  -8  -2  11   21.13   13.20
  -8  -2  12   20.02   13.09
  -2  10  12   13.14   14.41
 -10   8  12   11.73   11.04
  -2  10  13   28.43   14.23
  -8  -2  13    8.99   14.04
 -10   8  13   25.72   15.73
  -2  10  14   10.37   13.65
  -8  -2  14    6.86   10.36
 -10   8  14   21.53   15.37
  -8  -2  15    6.47   11.47
  -2  10  15    6.73    9.84
 -10   8  15   14.09   18.89
 -10   8  16   17.80   17.90
  -8  -2  16    2.65    9.84
  -8  -2  17  -17.46    9.16
   3 -10 -11    6.34    4.12
   3 -10 -10   10.94    6.93
  -3  10 -10   -8.33   10.72
   3 -10  -9   20.20    7.24
  -3  10  -9   11.15    4.86
   3 -10  -8  221.42   20.86
  -3  10  -7   19.23    7.71
 -10   7  -7   13.37    6.36
   3 -10  -7   12.51    6.30
  -7  -3  -6  105.93   22.96
  -3  10  -6   88.63   14.90
   3 -10  -6   90.88   18.69
  -3  10  -5  313.10   24.74
   3 -10  -5  343.51   33.52
  -7  -3  -5  355.75   37.07
  -3  10  -4  488.65   25.81
   3 -10  -4  537.12   38.87
  -7  -3  -4  540.35   42.36
   3 -10  -3  253.54   23.88
  -3  10  -3  249.24   15.50
   7   3  -2  576.55   37.98
   7   3  -1 1163.15   53.02
   7   3   0  534.70   36.41
  -3  10   0  524.14   22.53
  -3  10   1 1167.28   40.86
  -3  10   2  538.09   32.03
  -3  10   3  277.65   25.85
  -3  10   3  287.06   21.86
  -3  10   4  560.34   41.30
  -3  10   4  518.07   28.14
  -7  -3   5  312.09   27.34
  -3  10   5  330.63   33.61
 -10   7   5  342.02   34.49
  -7  -3   6   89.97   16.84
  -3  10   6   96.46   19.97
 -10   7   6  110.19   21.52
  -7  -3   7   17.64    7.55
  -3  10   7   18.39    7.82
 -10   7   7   19.90   10.25
  -7  -3   8  229.63   30.09
  -3  10   8  215.21   32.66
 -10   7   8  234.39   33.96
 -10   7   9   -6.18   11.41
  -3  10   9   10.26   10.97
  -7  -3   9   14.72    8.56
  -7  -3  10   15.37   12.02
  -3  10  10    6.18   10.73
 -10   7  10   30.29   15.53
 -10   7  11    6.54    6.99
  -3  10  11   12.21    8.99
  -7  -3  11   14.05   12.11
  -3  10  12   13.46   17.76
  -7  -3  12   -4.66    9.42
 -10   7  12    7.41    7.44
  -3  10  13   28.36   15.50
  -7  -3  13    1.69    8.46
 -10   7  13    8.53   15.07
  -7  -3  14    3.79    9.25
 -10   7  14    7.76   15.07
  -3  10  14   -4.35   10.37
  -3  10  15    7.81   16.91
 -10   7  15    2.97   14.49
  -7  -3  15  -22.65   14.89
  -7  -3  16    1.10    9.90
 -10   7  16    6.03   16.79
  -7  -3  17   12.14   18.95
  10  -6 -11   37.86    6.69
   4 -10 -11   36.79    8.90
   4 -10 -10   21.43    7.41
  10  -6 -10   17.43    4.59
  -4  10  -9   -1.41    5.82
   4 -10  -9    4.52    4.02
  10  -6  -9    9.41    3.14
  10  -6  -8   20.77    4.45
  -6  -4  -7   24.18   12.08
 -10   6  -7   41.93   14.39
   4 -10  -7   57.14   17.78
  -4  10  -7   35.59   11.88
  -4  10  -6  173.36   21.25
   4 -10  -6  179.59   26.02
  -6  -4  -6  187.35   28.13
  -6  -4  -5  314.99   35.35
   4 -10  -5  300.71   30.98
  -4  10  -5  270.71   23.26
  -4  10  -4 1002.85   40.26
   4 -10  -4 1093.64   54.73
  -6  -4  -4 1046.87   59.36
  -6  -4  -3  941.43   51.98
   6   4  -1 1122.13   53.03
   6   4   0  135.49   18.90
  -4  10   1 1092.64   39.56
  -4  10   2  524.01   31.64
 -10   6   3  882.03   31.43
  -4  10   3 1019.89   50.24
  -4  10   4  997.54   36.09
  -4  10   4 1136.16   56.88
  -4  10   5  338.22   34.18
  -6  -4   5  308.82   26.76
  -4  10   6  186.03   27.16
 -10   6   6  192.85   26.27
  -6  -4   6  173.73   22.50
  -4  10   7   52.07   17.88
 -10   6   7   53.31   16.08
  -6  -4   7   36.76   13.32
  -4  10   8    7.14   10.52
  -6  -4   8   24.70   12.22
 -10   6   8   22.52   12.27
 -10   6   9   -0.16    8.17
  -4  10   9    5.76   11.18
  -6  -4   9   16.82   10.21
  -4  10  10   39.14   17.45
 -10   6  10   47.63   17.47
  -6  -4  10   47.73   16.71
  -6  -4  11   55.79   19.22
 -10   6  11   53.93   18.61
  -4  10  11   30.90   15.46
  -6  -4  12   25.07   15.09
 -10   6  12    5.70   12.69
  -4  10  12   -0.13   13.99
  -4  10  13   19.44   18.97
 -10   6  13   15.30   14.68
  -6  -4  13   29.15   14.03
 -10   6  14   -9.97   13.53
  -4  10  14   17.22   15.48
  -6  -4  14    8.74   11.51
 -10   6  15   -3.24   14.39
  -4  10  15    8.46    9.18
  -6  -4  15   12.02   14.27
 -10   6  16   11.78   15.97
  -6  -4  16   -3.43   11.17
  -6  -4  17    4.45   11.78
   5 -10 -11   13.60    5.73
   5 -10 -10   36.00    7.49
  10  -5  -9  181.34   16.19
  -5  10  -9  217.90   30.92
  10  -5  -8    5.94    4.15
  10  -5  -7   79.30    9.71
  -5  10  -7  101.24   18.35
   5 -10  -7  124.93   23.77
  -5  -5  -7  104.30   22.65
 -10   5  -7  115.69   24.76
   5 -10  -6   97.82   18.89
  -5  -5  -6   87.55   19.64
  -5  10  -6   99.12   16.78
  -5  -5  -5  339.05   34.71
  -5  10  -5  333.05   27.58
  -5  -5  -4   58.62   14.47
  -5  -5  -4   67.72   16.22
  -5  10  -4   58.51   10.85
  -5  -5  -3  829.67   48.00
  -5  -5  -2  965.97   46.43
   5   5  -1  100.12   15.67
   5   5   0  626.80   39.97
   5   5   1   94.22   15.86
  -5  10   2  979.22   43.43
  -5  10   3  810.04   44.49
 -10   5   3  725.54   30.63
  -5  -5   4   51.72   10.22
  -5  10   4   30.25    6.99
  -5  10   4   61.05    8.64
  -5  -5   5  351.97   28.13
  -5  10   5  348.83   34.07
 -10   5   6   96.12   18.78
  -5  10   6   94.90   19.41
  -5  -5   6   77.60   15.04
  -5  -5   7  101.70   18.51
 -10   5   7   93.35   20.66
  -5  10   7  105.19   23.26
 -10   5   8   -4.70    6.54
  -5  -5   8   12.95    9.13
  -5  10   8   -0.26    6.35
  -5  -5   9  171.93   28.86
  -5  10   9  202.59   34.90
 -10   5   9  187.75   33.36
  -5  -5  10   33.97   14.53
  -5  10  10   56.41   21.48
 -10   5  10   52.46   20.63
  -5  10  11   12.82    9.10
  -5  -5  11   14.24   11.43
 -10   5  11   16.01   10.49
  -5  10  12   22.55   15.88
 -10   5  12   -0.85    8.24
  -5  -5  12    8.55   11.69
 -10   5  13   16.74   15.35
  -5  -5  13    4.80    8.03
  -5  10  13   10.29    9.60
 -10   5  14   13.43   14.49
  -5  -5  14   26.20   16.85
  -5  10  14    9.81   11.61
  -5  -5  15  -24.72   18.42
 -10   5  15   23.61   19.44
  -5  10  15   23.71   21.72
 -10   5  16   21.35   21.03
  -5  -5  16    5.23    9.48
  -5  -5  17  -16.82   16.34
  -6  10  -9   53.47   16.97
  10  -4  -7   95.88   12.23
  -4  -6  -7   74.71   19.06
  10  -4  -6   52.69    8.92
  -4  -6  -6   58.74   15.55
  -6  10  -6   41.39   11.19
  -4  -6  -6    8.87    6.49
  -6  10  -5  147.53   19.32
  -4  -6  -5  143.73   20.00
  -4  -6  -5  153.10   23.93
  -4  -6  -4  139.46   20.76
  -4  -6  -4  153.22   20.07
  -4  -6  -3  331.15   29.72
  -4  -6  -2  129.15   16.53
   4   6   0 1656.16   62.80
   4   6   1  671.60   39.92
  -6  10   2  127.15   15.52
   4   6   2  160.36   20.51
 -10   4   2  135.33   14.93
 -10   4   3  304.44   21.20
  -6  10   3  318.41   28.09
  -4  -6   4  145.39   15.09
  -6  10   4  115.66    9.66
  -6  10   4  121.06   17.82
  -6  10   5  143.90   21.26
  -4  -6   5  191.06   20.77
 -10   4   6   57.06   14.32
  -4  -6   6   56.97   11.88
  -6  10   6   49.41   13.68
 -10   4   7   91.92   19.80
  -6  10   7   99.45   20.86
  -4  -6   7   92.38   17.03
 -10   4   8   82.54   20.71
  -6  10   8   85.87   21.78
  -4  -6   8   89.22   19.39
  -4  -6   9   42.76   14.14
  -6  10   9   54.34   21.53
 -10   4   9   41.39   13.88
  -4  -6  10   40.33   14.33
 -10   4  10   55.04   20.73
  -6  10  10   54.08   20.04
  -6  10  11   48.93   19.67
  -4  -6  11   54.82   18.87
 -10   4  11   65.64   21.05
  -6  10  12   34.19   12.83
  -4  -6  12   33.42   17.26
 -10   4  12   28.76   16.57
  -6  10  13    2.77    9.31
  -4  -6  13   -4.94    6.94
 -10   4  13  -10.52    8.55
  -4  -6  14   21.15   17.17
 -10   4  14   45.95   22.62
  -6  10  14   13.59   20.45
  -4  -6  15    4.40   14.47
 -10   4  15   14.18   10.54
  -6  10  15  -16.01   17.33
 -10   4  16   35.56   21.41
  -4  -6  16   14.31   15.97
  -4  -6  17   -5.51   15.20
  -7  10  -9   33.49   14.41
  -7  10  -8   58.89   16.36
  -3  -7  -7   56.40   16.12
  10  -3  -7   52.36    9.51
  10  -3  -6  129.45   15.10
  -3  -7  -6  121.58   18.43
  -3  -7  -6  141.74   24.19
  -7  10  -6  126.58   20.29
  -3  -7  -5  219.76   25.13
  10  -3  -5  191.89   18.28
  -3  -7  -5  201.31   28.28
  -7  10  -5  201.36   24.00
  -3  -7  -4  120.88   18.19
  -3  -7  -4  113.69   18.74
  -3  -7  -3  719.61   42.54
  -3  -7  -3  801.38   45.21
  -3  -7  -2  371.80   27.63
  -3  -7  -1  589.80   30.45
   3   7   1  644.98   39.28
 -10   3   1  614.43   35.05
 -10   3   2  387.47   26.54
   3   7   2  408.61   31.12
  -7  10   3  845.33   45.82
  -3  -7   3  750.04   27.13
  -3  -7   4  102.07   12.47
  -7  10   4  125.93   19.94
  -7  10   4   91.44    7.58
  -3  -7   5  186.71   18.79
   3   7   5  226.98   29.72
  -7  10   5  204.24   27.05
  -7  10   6  124.19   21.26
   3   7   6  130.19   23.33
  -3  -7   6  114.71   16.17
 -10   3   6  131.22   21.88
   3   7   7   38.99   14.52
  -3  -7   7   40.06   10.46
 -10   3   7   68.73   16.77
  -7  10   7   60.71   16.53
 -10   3   8   50.22   15.71
  -3  -7   8   64.96   15.95
   3   7   8   57.62   19.83
  -7  10   8   53.08   19.33
 -10   3   9   10.47    8.93
  -3  -7   9   14.35    5.69
  -7  10   9   25.12   12.85
  -3  -7  10   22.98   12.32
   3   7  10    7.37   10.03
  -7  10  10   22.16   14.28
 -10   3  10   28.03   14.79
   3   7  11   29.37   15.58
  -3  -7  11   28.00   12.79
 -10   3  11   34.78   15.12
  -7  10  11   35.07   16.02
  -7  10  12    8.41   11.29
 -10   3  12   24.07   15.74
  -3  -7  12   -0.01    8.54
  -3  -7  13    4.55   10.72
 -10   3  13   -0.27    9.89
  -7  10  13   26.58   17.81
  -3  -7  14    7.47   10.62
 -10   3  14    0.15   10.37
  -7  10  14    2.57   11.34
  -7  10  15    9.42    9.81
  -3  -7  15   12.27   16.12
 -10   3  15    2.24    9.40
 -10   3  16   -2.53    9.32
  -3  -7  16  -14.90   17.94
  -2  -8 -11   38.46   13.75
  -2  -8 -10   17.18    8.39
  -8  10  -8   52.60   14.70
  -2  -8  -7   18.87    9.20
  -2  -8  -7   28.97   13.19
  -8  10  -6    4.32    5.98
  -2  -8  -6   38.74   13.42
  10  -2  -6   19.50    6.41
  -2  -8  -6   24.72   10.19
  -2  -8  -5  460.47   36.16
  -2  -8  -5  428.64   38.52
  10  -2  -5  436.35   29.90
  10  -2  -4   66.40   12.82
  -2  -8  -4   36.61   10.71
  -2  -8  -4   27.34    9.36
  -2  -8  -3  635.05   39.82
  -2  -8  -2  261.58   22.44
  -2  -8  -1    5.28    3.04
  -2  -8   0 2425.56   49.04
  -2  -8   1    7.66    2.29
   2   8   1   10.07    5.81
 -10   2   1    5.70    5.95
   2   8   2  272.78   25.69
 -10   2   2  256.55   22.79
  -2  -8   3  543.16   20.19
   2   8   3  645.12   39.94
   2   8   4   54.64   15.73
  -2  -8   4   34.69    7.42
  -8  10   4   27.73   10.34
  -8  10   5  443.26   40.09
  -2  -8   5  435.94   27.82
   2   8   5  430.44   40.25
  -8  10   6   23.77    8.14
  -2  -8   6   23.95    6.99
   2   8   6   23.29    9.41
 -10   2   6   48.45   14.74
  -2  -8   7    8.97    4.87
   2   8   7   16.69    8.79
  -8  10   7   20.00    6.57
 -10   2   7   27.53   10.20
  -2  -8   8   45.77   11.64
   2   8   8   39.96   14.84
 -10   2   8   49.05   14.25
  -8  10   8   37.89   13.78
  -2  -8   9   -3.07    7.63
  -8  10   9    4.69    7.96
 -10   2   9  -10.29   14.06
   2   8   9    6.10    7.73
   2   8  10   -1.49   12.97
 -10   2  10    1.97    9.44
  -2  -8  10    3.19    5.89
   2   8  11   31.22   15.34
  -2  -8  11   43.73   16.78
  -8  10  11   32.75   15.52
 -10   2  11   35.54   16.25
 -10   2  12   -3.66   13.29
   2   8  12   -9.92   15.49
  -2  -8  12    4.79    8.75
  -8  10  12   19.61   16.49
  -2  -8  13   -7.99    9.94
  -8  10  13  -10.04   13.64
 -10   2  13   13.87   15.52
   2   8  13   -8.92   15.88
 -10   2  14   -1.77   10.50
  -8  10  14    3.53   10.51
  -2  -8  14    1.69    7.87
 -10   2  15   -3.92   10.37
  -8  10  15  -24.45   19.49
 -10   2  16    3.16   16.66
  -1  -9 -11   13.19    6.11
   1   9 -10   24.11   12.23
  -1  -9  -8    1.07    3.60
   1   9  -8    9.29    6.75
  -1  -9  -7   35.85   10.65
  -1  -9  -7   38.50   14.06
  -1  -9  -6  199.68   29.21
  -1  -9  -6  188.40   23.28
  10  -1  -6  157.42   18.86
  10  -1  -5  183.50   20.97
  -1  -9  -5  185.85   22.17
  -1  -9  -5  208.76   26.95
  -1  -9  -4  152.47   20.27
  10  -1  -4  194.92   21.42
  -1  -9  -3  147.54   18.90
  10  -1  -3  171.60   20.65
  -1  -9  -2   58.82   11.07
  -1  -9  -1  541.85   27.33
  -1  -9   0   -5.82    4.22
 -10   1   0   16.66    8.37
 -10   1   1  581.56   36.91
 -10   1   2   55.02   11.74
   1   9   2   13.03    5.90
   1   9   2   54.86   12.17
   1   9   3  159.99   19.66
   1   9   3  125.54   17.12
  -1  -9   4  161.72   13.18
   1   9   4  159.52   22.01
  -9  10   4  173.51   22.01
  -1  -9   5  164.43   16.45
   1   9   5  188.16   26.89
  -9  10   5  192.82   27.08
 -10   1   6  201.48   25.89
  -1  -9   6  181.48   20.21
   1   9   6  182.91   28.22
  -9  10   6  164.38   25.83
 -10   1   7   46.64   14.56
  -9  10   7   35.84   13.71
  -1  -9   7   38.96   10.43
   1   9   7   36.14   15.47
 -10   1   8   48.81   15.32
  -9  10   8   36.40   13.31
   1   9   8   34.58   12.81
  -1  -9   8   39.73   10.59
 -10   1   9   -2.34   13.41
   1   9   9    9.74   10.14
  -1  -9   9   16.04    8.48
  -9  10   9   14.63    9.65
   1   9  10    1.82   10.11
  -1  -9  10    8.87    8.88
 -10   1  10    4.00    7.83
  -9  10  10   33.34   15.02
  -1  -9  11   15.57   11.54
  -9  10  11   -8.96   10.37
   1   9  11   -3.04    8.05
 -10   1  11    5.41    9.84
 -10   1  12   15.36   12.71
  -9  10  12   29.75   17.01
  -1  -9  12    4.61   11.00
   1   9  12   13.19   12.67
  -1  -9  13   -8.49   10.20
 -10   1  13   -0.93   11.45
  -9  10  13   -5.95   12.52
   1   9  13   -9.03   10.18
  -9  10  14   25.11   20.60
   1   9  14    1.84   12.86
 -10   1  14   -0.80   10.34
 -10   1  15   -0.04   10.33
  -9  10  15   -1.49    9.30
 -10   1  16   13.61   16.44
   0  10 -10   15.90    9.97
   0  10  -8    0.58    3.08
 -10  10  -8   -3.73    7.08
   0 -10  -8   -5.16    5.53
 -10  10  -7   17.30    9.78
   0 -10  -7   18.91    9.85
   0  10  -7   19.43    7.98
   0 -10  -7   20.29    9.76
   0 -10  -6   46.86   10.59
  10   0  -6   56.71   11.75
   0  10  -6   54.85   10.38
   0 -10  -6   55.98   14.05
  10   0  -5  119.14   17.74
   0 -10  -5  137.68   22.25
  10   0  -4  366.95   30.83
   0 -10  -4  392.98   35.01
   0 -10  -3  411.51   32.02
  10   0  -3  419.32   32.81
   0 -10  -2  859.40   40.62
   0 -10  -1   26.06    5.14
   0 -10   0   12.18    3.42
 -10   0   1   50.77   12.31
   0  10   1   20.94    3.47
   0  10   2  903.74   42.62
   0  10   2  883.74   45.56
   0  10   3  413.46   32.40
   0  10   3  413.44   31.10
   0  10   4  390.54   35.62
   0  10   5  135.26   23.06
 -10  10   5  142.73   23.51
   0  10   6   58.86   15.89
 -10  10   6   61.20   16.40
 -10   0   6   53.66   13.84
   0 -10   6   27.53    6.81
 -10  10   7   16.46    9.30
   0  10   7    9.28    8.08
 -10   0   7   37.37   13.93
   0 -10   7   16.51    7.32
   0  10   8  -10.36   11.38
 -10   0   8    1.91    8.55
 -10  10   8  -21.09   14.89
   0 -10   8   -4.15    6.36
 -10   0   9   -8.24   12.28
   0  10   9    5.56   10.32
   0 -10   9    7.08    5.86
 -10  10   9  -14.56   14.79
   0  10  10    0.77    9.36
 -10  10  10   29.53   17.61
 -10   0  10   24.80   12.65
   0 -10  10   23.25   11.78
   0  10  11   15.28   15.03
 -10  10  11   27.14   14.36
 -10   0  11    9.14    6.66
 -10  10  12   19.54   15.04
 -10   0  12   24.19   12.46
   0  10  12   -1.48   11.63
 -10   0  13    4.21    7.72
 -10  10  13   -7.33    8.32
   0  10  13    2.69    9.98
 -10   0  14   -3.01    8.63
 -10  10  14   28.83   19.46
   0  10  14   -2.15   14.74
   0  10  15   15.85   13.09
 -10   0  15   24.63   16.85
 -10  10  15   21.23   19.93
 -10   0  16  -21.21   18.18
  -1  11 -10   -2.71    5.11
   1 -11 -10    0.04    2.51
   1 -11  -9   46.78   11.89
   1 -11  -8  114.43   18.66
  -1  11  -8   95.27   16.51
  -1  11  -7   48.54   10.48
 -11  10  -7   55.95   15.13
 -10  -1  -6   89.06   20.94
  -1  11  -6   61.50   10.24
   1 -11  -6   56.66   14.53
 -10  -1  -5   90.02   20.15
  10   1  -5   74.23   15.44
   1 -11  -5   69.58   16.30
  -1  11  -5   70.46    9.94
  10   1  -4   86.74   16.73
   1 -11  -4   81.17   15.52
  10   1  -3  411.60   34.33
   1 -11  -3  366.43   30.26
  10   1  -2  676.40   43.71
   1 -11  -2  608.66   34.03
   1 -11  -1  298.30   19.73
  -1  11   0   28.56    4.26
  -1  11   1  331.85   22.31
 -10  -1   1  322.95   30.37
  -1  11   2  764.19   40.11
  -1  11   3  391.51   32.05
  -1  11   3  404.21   30.75
  -1  11   4   76.59   13.39
  -1  11   4   81.75   16.43
  -1  11   5   60.36   14.64
 -11  10   5   74.39   17.63
  -1  11   6   58.16   15.33
 -11  10   6   67.49   17.20
 -10  -1   6  103.65   19.44
  -1  11   7   43.48   14.37
 -11  10   7   58.03   16.50
 -10  -1   7   64.38   16.31
 -10  -1   8  108.71   21.59
  -1  11   8  112.43   25.15
 -11  10   8   91.34   21.64
 -10  -1   9   11.81    6.90
  -1  11   9   62.84   22.18
 -11  10   9   47.21   15.23
 -10  -1  10    1.53    7.49
 -11  10  10   -4.40   10.67
  -1  11  10  -28.57   19.16
 -10  -1  11  -19.37   13.43
  -1  11  11   23.63   15.61
 -11  10  11   18.18   14.83
 -11  10  12   -8.55    9.40
 -10  -1  12    8.54    9.17
  -1  11  12   22.20   19.62
 -10  -1  13   -2.92   10.28
 -11  10  13   13.49   14.29
  -1  11  13   -1.53   15.11
  -1  11  14   42.43   24.58
 -11  10  14    5.06   12.24
 -10  -1  14   13.83   16.63
  -1  11  15   13.99   16.88
 -10  -1  15    9.77    9.74
 -11  10  15   15.45   21.58
 -10  -1  16    1.66    8.89
   2 -11 -10    4.67    6.84
  -2  11 -10    1.56    5.17
   2 -11  -9   40.54   11.44
  -2  11  -8    4.79    6.08
 -11   9  -7   18.33    6.43
  -2  11  -7    4.29    5.68
   2 -11  -6    3.38    7.28
  -9  -2  -6   20.80    6.25
  -2  11  -6    4.31    3.99
  -9  -2  -5  142.69   24.49
  -2  11  -5  127.41   13.00
   2 -11  -5  159.17   22.93
   2 -11  -4   -2.38    7.03
   9   2  -4    6.57    7.60
  -2  11  -4   13.29    3.67
   9   2  -3  237.26   25.32
   2 -11  -3  191.56   20.71
   9   2  -2  402.92   33.82
   2 -11  -2  322.51   23.23
   9   2  -1  114.79   18.39
  -2  11   0  200.96   13.45
  -9  -2   1  139.90   19.25
  -2  11   1  104.71   12.04
  -2  11   2  434.32   29.60
  -2  11   3  230.62   22.66
  -2  11   3  211.74   23.02
  -2  11   4    6.23    3.78
  -2  11   4    9.23    4.66
 -11   9   4    7.82    2.31
  -2  11   5  134.81   21.26
 -11   9   5  171.24   25.11
  -9  -2   6   22.23    9.73
 -11   9   6   16.93    8.75
  -2  11   6   13.39    7.00
 -11   9   7    8.19    6.56
  -2  11   7    4.38    5.82
  -9  -2   7   16.76    9.58
 -11   9   8   15.08   10.60
  -2  11   8    6.52    9.62
  -9  -2   8   16.48    7.67
  -2  11   9   38.01   17.03
 -11   9   9   24.95    7.21
  -9  -2   9   19.66    9.76
  -2  11  10  -15.43   16.67
 -11   9  10   -4.06    8.52
  -9  -2  10   11.63   10.05
 -11   9  11   -3.78    9.26
  -2  11  11   -6.37   12.50
  -9  -2  11   -2.42    6.83
 -11   9  12   -7.65   10.47
  -9  -2  12   -6.33    9.89
  -2  11  12   21.81   16.83
  -9  -2  13   19.34   11.58
 -11   9  13   14.06   13.18
  -2  11  13   28.56   15.71
  -2  11  14   15.56   19.79
  -9  -2  14   20.36   14.91
 -11   9  14   34.06   18.53
  -9  -2  15    5.12   12.54
 -11   9  15   20.55   17.59
  -2  11  15    2.34   15.11
  -9  -2  16    8.96   16.74
  -3  11 -10   13.23    9.41
   3 -11 -10   17.99    6.06
  -3  11  -8   -1.20    3.25
 -11   8  -7    4.28    6.04
  -3  11  -7   21.53    6.71
  -8  -3  -6  112.25   22.71
  -3  11  -6  114.97   16.09
   3 -11  -6  121.98   21.69
  -8  -3  -5    3.87    8.16
   3 -11  -5  -10.17   10.12
  -3  11  -5    8.95    5.31
  -3  11  -4   81.47   10.03
   3 -11  -4   68.17   13.30
  -8  -3  -4   73.72   14.81
   3 -11  -3  177.47   20.37
  -3  11  -3  148.21   11.09
   8   3  -3  177.84   21.19
   8   3  -2    8.44    4.54
   8   3  -1   74.74   15.05
  -3  11  -1   42.16    5.20
  -3  11   0 1850.24   44.07
   8   3   0 1853.31   70.81
  -3  11   1   52.24    8.69
  -3  11   2   -6.55    7.43
  -3  11   3  211.83   20.13
  -3  11   3  189.44   21.15
  -3  11   4   69.54   11.35
  -3  11   4   80.22   15.05
  -8  -3   5    3.63    4.94
  -3  11   5  -10.80   11.46
 -11   8   6  137.39   23.83
  -3  11   6  117.79   22.09
  -8  -3   6  125.69   19.71
  -8  -3   7   13.01    7.95
  -3  11   7    9.68    7.41
 -11   8   7   22.35   10.77
 -11   8   8   32.54   13.33
  -3  11   8   44.62   15.63
  -8  -3   8   33.10   12.39
 -11   8   9   35.73   14.78
  -3  11   9   10.36   10.05
  -8  -3   9   50.66   17.89
 -11   8  10   43.23   18.85
  -8  -3  10   31.46   13.10
  -3  11  10   19.33   13.10
 -11   8  11    0.46    7.70
  -3  11  11   14.35    9.24
  -8  -3  11   15.40   12.11
  -3  11  12   -3.70   10.30
  -8  -3  12    9.47   12.59
 -11   8  12   -2.24    9.71
  -8  -3  13   -4.05    9.23
  -3  11  13   12.42   12.25
 -11   8  13   13.53   11.70
 -11   8  14   39.91   20.67
  -8  -3  14  -10.94    9.09
  -3  11  14   31.17   19.03
  -3  11  15   58.26   27.24
  -8  -3  15    0.44   11.04
 -11   8  15   28.16   20.79
  -8  -3  16    1.04   12.49
  -8  -3  17    3.40   13.71
  -4  11 -10   43.86   15.06
  -4  11  -9   -6.83    8.64
 -11   7  -7   77.79   18.59
  -4  11  -7   90.40   16.20
   4 -11  -6   86.31   17.32
  -7  -4  -6  107.81   22.36
  -4  11  -6   85.17   14.68
  -4  11  -5   28.88    7.13
   4 -11  -5   34.81    9.76
  -7  -4  -5   40.82   14.42
  -4  11  -4   21.58    5.90
  -7  -4  -4   25.07    9.40
   4 -11  -4   22.85    9.43
   7   4  -2  283.95   27.53
   7   4  -1  225.24   24.16
   7   4   0  188.92   23.36
  -4  11   0  169.64   12.85
  -4  11   1  211.55   18.18
  -4  11   2  250.54   22.14
 -11   7   3  262.23   18.11
  -4  11   3  278.74   26.97
  -4  11   4   18.63    6.66
  -4  11   4   17.25    8.20
  -4  11   5   34.44    8.96
  -7  -4   5   40.78   10.48
  -7  -4   6   80.04   15.25
  -4  11   6   92.64   20.56
 -11   7   6   98.20   20.25
 -11   7   7   99.15   21.01
  -4  11   7   90.86   19.78
  -7  -4   7   85.54   16.53
  -4  11   8   75.56   18.61
 -11   7   8   70.88   18.46
  -7  -4   8   66.16   15.26
  -4  11   9   11.60   10.34
  -7  -4   9    0.55    7.60
 -11   7   9   -1.34   10.07
  -4  11  10   45.40   17.77
 -11   7  10   34.79   16.95
  -7  -4  10   53.91   18.94
  -4  11  11   -4.79   14.31
 -11   7  11  -15.05   12.66
  -7  -4  11    6.03    6.53
  -7  -4  12    1.30   10.27
  -4  11  12   29.17   14.62
 -11   7  12   13.54   10.11
 -11   7  13    9.63   14.85
  -4  11  13   11.11   13.18
  -7  -4  13   15.68   10.45
  -7  -4  14    1.05    8.89
 -11   7  14    6.50   11.91
  -4  11  14    4.34    8.61
 -11   7  15   10.25   12.18
  -4  11  15   19.76   25.27
  -7  -4  15   -0.22    8.71
  -7  -4  16   10.75   12.49
 -11   7  16   -1.94    8.84
  -7  -4  17    8.52   11.43
  11  -6 -11    6.17    3.28
  11  -6 -10   73.05    9.00
  -5  11  -9   51.33   14.73
  11  -6  -9   40.94    6.56
  -5  11  -7  143.42   21.18
  -6  -5  -6   38.60   13.17
  -5  11  -6   39.46    9.81
   5 -11  -6   54.20   15.34
  -5  11  -5  112.78   15.67
  -6  -5  -5  127.57   22.27
  -5  11  -4  230.86   20.49
  -6  -5  -4  238.26   29.50
  -6  -5  -3   74.99   15.14
   6   5  -1  936.88   49.87
   6   5   0  222.01   24.95
   6   5   1  959.44   50.10
  -5  11   1  934.11   38.17
  -5  11   2  256.15   23.04
  -5  11   3   68.50   12.27
 -11   6   3   76.14   10.41
  -5  11   4  213.53   16.79
  -5  11   4  213.56   25.35
  -6  -5   5  153.07   19.30
  -5  11   5  138.61   22.29
  -5  11   6   51.32   15.28
  -6  -5   6   37.12    9.70
 -11   6   6   48.26   13.78
  -6  -5   7  129.08   20.96
 -11   6   7  153.89   25.74
  -5  11   7  140.58   26.18
 -11   6   8   29.14   12.35
  -6  -5   8   27.37   10.29
  -5  11   8   31.77   13.84
 -11   6   9   57.24   17.21
  -5  11   9   76.92   22.20
  -6  -5   9   30.97   12.29
  -6  -5  10   94.52   22.88
  -5  11  10  116.27   28.90
 -11   6  10   91.84   25.18
 -11   6  11    1.40    7.36
  -6  -5  11    3.77    9.63
  -5  11  11   17.18    8.71
  -5  11  12   32.93   17.63
 -11   6  12   15.33   12.59
  -6  -5  12   22.92   13.05
  -6  -5  13   -4.82    7.56
 -11   6  13    6.79   12.64
  -5  11  13   -0.90    8.79
 -11   6  14   17.58   16.48
  -6  -5  14   -1.97    8.81
  -5  11  14    5.61   13.04
  -5  11  15    8.33   17.56
 -11   6  15   24.03   18.70
  -6  -5  15   16.54   13.79
 -11   6  16   29.31   21.17
  -6  -5  16   27.24   20.93
  -6  -5  17  -26.53   16.98
  11  -5 -11   33.70    7.91
  11  -5 -10   27.39    7.31
  -6  11  -9    5.79    7.45
  11  -5  -9   12.73    5.78
  11  -5  -8   27.92    6.65
  -6  11  -7   67.57   15.97
  11  -5  -7  152.58   14.50
  -6  11  -6    4.44    4.69
  -5  -6  -6   23.30    9.38
  -5  -6  -5   73.67   16.09
  -6  11  -5   67.97   12.48
  -5  -6  -4   65.03   12.68
  -5  -6  -4   81.32   16.32
  -5  -6  -3  272.47   27.46
  -5  -6  -2  442.96   31.94
   5   6  -1   44.00   11.73
   5   6   0   -1.10    7.34
   5   6   1   61.95   12.28
 -11   5   2  435.87   27.25
  -6  11   2  439.59   30.04
 -11   5   3  291.66   21.42
  -6  11   3  289.67   27.28
  -5  -6   4   68.09   10.75
  -6  11   4   58.62   12.68
  -6  11   4   66.29    8.71
  -6  11   5   44.13   10.35
  -5  -6   5   64.59   12.45
 -11   5   6   14.68    7.80
  -6  11   6   31.35   11.70
  -5  -6   6   16.08    6.79
  -5  -6   7  181.40   23.66
  -6  11   7  194.82   31.09
 -11   5   7  162.93   25.36
 -11   5   8   33.66   14.68
  -5  -6   8   31.93   11.69
  -6  11   8   44.99   18.77
 -11   5   9   29.53   13.43
  -5  -6   9   20.13   12.52
  -6  11   9   31.62   18.41
 -11   5  10   16.80   13.73
  -6  11  10   11.11   10.43
  -5  -6  10   32.93   13.39
  -5  -6  11   20.84   11.58
 -11   5  11   43.40   17.95
  -6  11  11   15.80   10.01
  -5  -6  12   17.25   12.27
  -6  11  12   24.47   16.28
 -11   5  12   23.36   14.85
  -5  -6  13   50.30   20.81
 -11   5  13   29.56   20.37
  -6  11  13   45.64   20.30
  -5  -6  14   -3.82   11.71
  -6  11  14    8.59   16.72
 -11   5  14    0.27   13.54
  -5  -6  15    5.36   10.82
  -6  11  15   24.04   13.66
 -11   5  15  -14.49   13.06
 -11   5  16  -14.73   12.52
  -5  -6  16   14.04   13.83
  -5  -6  17   -6.04   11.38
  11  -4 -10   19.24    7.29
  11  -4  -9   51.60    9.86
  -7  11  -9   56.54   16.42
  11  -4  -8  156.54   16.82
  -4  -7  -8  144.12   23.99
  11  -4  -7   45.74    8.81
  -4  -7  -6   11.57    9.69
  11  -4  -6   15.58    5.41
  -7  11  -6   18.00    7.26
  -7  11  -5    7.46    6.16
  -4  -7  -5   -2.46    8.04
  -4  -7  -5    2.54    2.69
  -4  -7  -4  634.35   45.30
  -4  -7  -4  708.46   46.88
  -4  -7  -3  992.90   53.12
  -4  -7  -3  937.60   50.91
  -4  -7  -2  157.14   19.18
  -4  -7  -1   92.90   13.61
   4   7   0 2394.13   78.40
   4   7   1   87.52   15.78
 -11   4   2  141.99   16.58
   4   7   2  167.39   21.80
 -11   4   3  890.42   38.80
  -7  11   3  972.45   50.02
  -7  11   4  564.39   22.03
  -4  -7   4  598.44   29.85
  -7  11   4  676.18   45.55
  -7  11   5   -2.94    6.21
  -4  -7   5    1.11    3.47
 -11   4   6   24.86   11.16
  -4  -7   6   27.40    9.20
  -7  11   6   -0.94   10.87
  -7  11   7   70.83   19.05
  -4  -7   7   45.77   11.84
 -11   4   7   52.39   15.35
 -11   4   8  134.25   24.81
  -4  -7   8  153.22   23.69
  -7  11   8  139.69   27.73
  -4  -7   9   53.76   13.91
 -11   4   9   56.35   17.53
  -7  11   9   64.60   21.20
  -4  -7  10    4.06    5.90
 -11   4  10   22.30   12.81
  -7  11  10    8.03    8.44
  -4  -7  11   -5.75    9.27
 -11   4  11  -11.43   10.93
  -7  11  11   16.21   13.58
 -11   4  12    4.99    9.48
  -4  -7  12   20.68    8.95
  -7  11  12  -11.56    9.49
  -4  -7  13    6.02   12.61
  -7  11  13   13.72   18.03
 -11   4  13   -6.38   11.18
 -11   4  14  -16.03   14.26
  -4  -7  14   -3.72   12.44
  -7  11  14   21.83   18.20
  -7  11  15  -15.83   18.37
  -4  -7  15    2.64   11.16
 -11   4  15  -18.37   16.58
 -11   4  16   23.68   20.13
  -4  -7  16    7.38   10.95
  -3  -8 -11    5.58    6.92
  -3  -8 -10   -7.11    8.34
  -3  -8  -9    5.85    5.03
  -8  11  -9    5.13    5.47
  11  -3  -9   -1.48    6.51
  -8  11  -8   13.05    7.70
  11  -3  -8   13.30    5.80
  11  -3  -7   33.78    8.73
  -8  11  -6   92.78   17.30
  -3  -8  -6  124.99   23.49
  11  -3  -6  111.23   15.10
  -3  -8  -5   17.02    9.43
  -3  -8  -5   25.36   12.88
  11  -3  -5    9.62    4.86
  -3  -8  -4  605.66   43.60
  -3  -8  -4  635.62   42.80
  -3  -8  -3  245.87   25.66
  -3  -8  -2  110.16   15.42
  -3  -8  -1   24.24    6.35
  -3  -8   0   62.10    9.51
 -11   3   1   25.84    8.39
   3   8   1   30.65   10.07
 -11   3   2  124.95   16.58
   3   8   2  141.92   20.13
  -3  -8   3  225.86   14.22
  -8  11   3  256.58   27.10
  -3  -8   4  628.20   28.01
  -8  11   4  627.39   44.40
   3   8   5   -3.33   10.51
  -3  -8   5    5.44    3.30
  -3  -8   6  103.76   15.88
 -11   3   6  128.13   22.87
  -8  11   6   82.21   18.24
   3   8   6   97.96   20.88
  -8  11   7   15.81    7.13
   3   8   7   23.83   11.60
 -11   3   7   31.34   11.53
  -3  -8   7   28.51   10.14
 -11   3   8    8.28    9.90
  -3  -8   8   11.11    7.41
   3   8   8   -1.46    8.74
  -8  11   8   21.63   10.55
  -8  11   9   26.84   13.52
 -11   3   9   -2.37   10.63
  -3  -8   9    8.56    5.56
   3   8   9    0.44    9.65
  -8  11  10   -1.87    8.58
 -11   3  10  -24.80   15.66
  -3  -8  10   -2.64    7.22
   3   8  10  -23.34   16.34
  -8  11  11   14.84   14.94
  -3  -8  11   -1.29    9.79
   3   8  11    1.62   11.06
 -11   3  11  -11.70   13.38
  -3  -8  12   -4.28   10.08
  -8  11  12   22.39   13.24
 -11   3  12   39.31   17.38
  -8  11  13   -4.13   10.44
  -3  -8  13    8.03   13.65
 -11   3  13   12.83   14.19
  -3  -8  14    4.12   10.70
 -11   3  14   -1.22    9.81
  -8  11  14    5.86   16.15
 -11   3  15   15.42   16.74
  -8  11  15   23.62   18.72
  -3  -8  15   12.86   13.18
 -11   3  16  -18.25   18.64
  -2  -9 -11   12.17    8.76
  -2  -9 -10    3.91    6.60
  -9  11  -8    3.00    6.11
  11  -2  -8   20.45    4.80
  11  -2  -7   57.65   11.63
  -2  -9  -6  130.89   21.20
  11  -2  -6  186.37   20.48
  -2  -9  -6  184.46   28.20
  11  -2  -5  336.16   27.89
  -2  -9  -5  343.34   31.52
  -2  -9  -5  353.14   36.58
  -2  -9  -4  555.62   41.02
  11  -2  -4  571.61   35.70
  -2  -9  -3  362.27   31.28
  -2  -9  -2   40.43    9.19
  -2  -9  -1   84.86   11.47
  -2  -9   0   17.57    4.66
 -11   2   1   89.25   14.71
   2   9   1   79.79   13.01
  -2  -9   1   64.70    6.30
 -11   2   2   36.45    9.79
   2   9   2   42.38   11.18
   2   9   3  325.40   28.90
  -2  -9   3  248.66   12.70
  -9  11   4  518.65   40.40
   2   9   4  563.34   43.00
  -2  -9   4  476.08   22.86
  -2  -9   5  325.45   23.30
  -9  11   5  354.53   37.10
   2   9   5  327.48   34.99
  -2  -9   6  171.87   19.23
 -11   2   6  168.84   24.75
  -9  11   6  185.88   27.70
   2   9   6  176.80   27.88
   2   9   7   55.64   16.14
  -2  -9   7   57.37   11.75
  -9  11   7   74.31   19.37
 -11   2   7   64.68   17.23
   2   9   8   28.53   13.71
 -11   2   8   25.71   11.87
  -9  11   8    6.79    9.20
  -2  -9   8   16.59    7.20
  -2  -9   9  -14.19    8.33
   2   9   9  -13.61   15.19
 -11   2   9  -12.03   12.46
  -9  11   9   19.30   10.12
   2   9  10   -5.76   11.49
  -2  -9  10   -1.69   10.75
  -9  11  10    6.29    9.83
 -11   2  10  -22.32   15.79
   2   9  11   17.25   12.68
  -9  11  11    4.43    9.28
  -2  -9  11   17.31   12.07
 -11   2  11    9.65   10.09
 -11   2  12   -4.12    7.92
  -9  11  12  -18.04   14.84
  -2  -9  12    5.53    9.76
   2   9  12    2.89    8.61
 -11   2  13    4.82   11.74
  -9  11  13   16.26   17.64
   2   9  13   22.72   17.47
  -2  -9  13   14.64    7.95
  -9  11  14   -4.51   10.51
 -11   2  14   -7.86   15.90
  -2  -9  14   28.61   17.62
  -9  11  15    8.65   14.36
 -11   2  15    1.08   10.02
 -11   2  16   19.36   18.84
  -1 -10 -11   10.61    7.82
 -10  11  -8    1.12    8.09
  11  -1  -7  122.95   17.77
 -10  11  -7  133.19   23.83
  11  -1  -6   73.19   14.59
  -1 -10  -6   64.82   14.74
  -1 -10  -6   44.52   13.19
  -1 -10  -5  114.06   21.81
  11  -1  -5   94.49   16.34
  11  -1  -4   37.46   11.02
  -1 -10  -4   16.67    7.87
  -1 -10  -3  301.47   28.19
  -1 -10  -2  810.12   40.18
  -1 -10  -1    6.32    3.26
 -11   1   0   45.42   10.42
  -1 -10   0   37.63    5.79
 -11   1   1    5.70    5.89
   1  10   2  798.01   45.89
 -11   1   2  792.57   44.27
   1  10   2  736.31   38.26
   1  10   3  271.95   25.93
   1  10   3  279.99   26.87
 -10  11   4   22.45    9.70
  -1 -10   4   10.50    2.62
   1  10   4   12.18    8.04
  -1 -10   5   68.59   10.08
   1  10   5   89.35   19.18
 -10  11   5  113.68   21.86
   1  10   6   53.08   14.15
 -11   1   6   72.81   17.65
  -1 -10   6   59.51   11.62
 -10  11   6   68.49   18.52
  -1 -10   7  134.15   19.08
   1  10   7  127.45   26.48
 -10  11   7  159.15   27.28
 -11   1   7  160.95   25.58
 -10  11   8   -9.30   11.32
 -11   1   8    8.99    8.92
  -1 -10   8   -3.55    8.59
   1  10   8   -9.41   11.95
 -11   1   9   -2.06   11.89
 -10  11   9    4.08    6.59
   1  10   9   16.26   12.42
  -1 -10   9    1.59    5.91
   1  10  10   -1.21    8.05
 -11   1  10    9.96    7.63
  -1 -10  10   22.23    9.59
  -1 -10  11    3.68    8.79
   1  10  11   12.18   11.92
 -10  11  11   -2.56    9.17
 -11   1  11   21.89   10.39
   1  10  12   -2.66   12.70
 -10  11  12    5.72   11.47
  -1 -10  12    5.16    8.05
 -11   1  12   -2.05    7.39
 -10  11  13   28.72   18.77
 -11   1  13   -0.95    7.72
   1  10  13    6.85   12.47
 -10  11  14   -1.18   15.19
 -11   1  14   -3.39    8.87
   1  10  14    4.38    8.66
 -10  11  15   18.15   17.69
 -11   1  15   -6.97   14.21
 -11   1  16   26.82   16.05
   0  11 -10   24.58   10.72
   0 -11  -8   -0.37    2.66
   0  11  -8    8.03    6.42
 -11  11  -7   17.07   11.16
  11   0  -7   14.05    7.19
   0 -11  -6   99.95   20.74
  11   0  -6   92.27   16.88
   0 -11  -5   78.77   17.17
  11   0  -5   74.79   15.31
  11   0  -4   83.41   14.84
   0 -11  -4   61.07   12.28
   0 -11  -3  595.90   39.61
  11   0  -3  615.94   41.33
   0 -11  -2  662.36   36.26
   0 -11  -1  121.44   12.89
   0 -11   0   36.94    5.79
 -11   0   0   48.71   12.27
 -11   0   1  152.13   21.15
   0  11   1  118.29   12.92
   0  11   2  696.18   37.86
   0  11   2  706.31   42.62
   0  11   3  599.10   39.31
   0  11   3  604.87   40.41
   0  11   4   71.68   14.34
   0  11   5   75.72   16.68
 -11  11   5   79.73   19.26
 -11   0   6  124.99   22.12
 -11  11   6  127.43   24.60
   0  11   6  105.40   21.46
   0  11   7    2.71    7.80
 -11  11   7   29.05   15.64
 -11   0   7   34.72   14.67
   0  11   8    4.52    7.28
 -11   0   8   20.14   12.14
 -11  11   8    7.39   10.77
   0  11   9   57.64   20.59
 -11   0   9   45.67   14.35
 -11  11   9   13.91    8.13
   0  11  10   41.92   16.64
 -11  11  10   55.53   18.96
 -11   0  10   20.81   15.81
 -11   0  11    6.03    6.37
   0  11  11   13.51   13.77
 -11  11  11   24.96   11.58
 -11   0  12  -12.82    8.13
 -11  11  12   -4.68    7.34
   0  11  12   -2.22   14.65
   0  11  13  -12.84   15.23
 -11   0  13    1.84    7.20
 -11   0  14   26.73   19.61
 -11  11  14   -0.28    9.20
   0  11  14   -6.22   16.03
 -11  11  15    2.81    9.65
 -11   0  15  -10.15   13.55
   0  11  15   10.94   14.29
 -11   0  16   -3.01   10.50
  -1  12 -10    7.82    6.63
  -1  12  -8   49.70   11.64
  -1  12  -7   68.73   12.34
 -12  11  -7   77.49   19.41
  11   1  -7   54.84   12.70
   1 -12  -6   47.37   12.55
  11   1  -6   72.23   15.43
  11   1  -5   68.60   14.72
   1 -12  -5   62.35   14.48
   1 -12  -4   75.86   15.13
  11   1  -4  117.10   19.39
  11   1  -3   15.71    9.33
   1 -12  -3    1.51    5.91
   1 -12  -2  192.51   19.37
  11   1  -2  245.94   28.71
   1 -12  -1  170.78   15.11
  -1  12   1  189.72   17.26
 -11  -1   1  212.16   25.67
  -1  12   2  252.37   23.44
  -1  12   3   21.75    8.51
  -1  12   3    5.15    4.12
  -1  12   4   91.17   15.88
  -1  12   4   99.67   15.89
 -12  11   5   73.54   17.95
  -1  12   5   67.05   14.25
  -1  12   6   50.70   15.23
 -12  11   6   83.33   19.62
 -11  -1   6   94.10   19.13
  -1  12   7   64.39   17.74
 -11  -1   7   75.54   18.03
 -12  11   7   63.59   17.65
 -11  -1   8   65.08   18.37
 -12  11   8   50.39   17.39
  -1  12   8   47.01   18.62
 -12  11   9   68.75   19.70
 -11  -1   9   74.67   17.80
  -1  12   9   67.69   23.38
 -12  11  10   -5.67   11.46
  -1  12  10    1.35   12.08
 -11  -1  10    8.80    9.03
  -1  12  11   -8.58   11.97
 -11  -1  11    7.97    9.04
 -12  11  11   13.60   12.53
  -1  12  12   30.84   16.06
 -11  -1  12  -18.45   12.86
 -12  11  12   19.50   16.17
  -1  12  13   -6.93    8.75
 -11  -1  13   20.84   14.89
 -12  11  13   31.55   19.71
 -11  -1  14   -4.40    8.49
 -12  11  14    7.94   15.53
  -1  12  14   22.27   20.50
  -1  12  15  -11.36   17.24
 -11  -1  15    5.54    8.17
 -11  -1  16  -23.75   17.84
  -2  12 -10    7.29    6.36
  -2  12  -8    8.01    7.42
  -2  12  -7   16.98    5.81
 -12  10  -7   11.58    8.26
  -2  12  -6   64.63   10.36
   2 -12  -6   46.94   11.48
  10   2  -5   32.31    9.29
  -2  12  -5   32.66    6.20
 -10  -2  -5   16.38    4.95
   2 -12  -5   17.24    4.48
  -2  12  -4   45.07    5.79
   2 -12  -4   68.88   14.55
  10   2  -4   76.58   15.14
   2 -12  -3  115.61   16.38
  10   2  -3  151.83   22.09
  10   2  -2  544.69   40.83
   2 -12  -2  454.01   28.71
  -2  12   0  346.92   18.34
  -2  12   1   23.27    5.59
 -10  -2   1   33.17   10.80
  -2  12   2  597.53   35.46
  -2  12   3  130.50   17.65
  -2  12   3  141.13   19.23
  -2  12   4   64.71   16.03
 -12  10   4   46.36    6.22
  -2  12   4   85.45   14.53
  -2  12   5   12.35    6.96
  -2  12   6   52.04   14.81
 -12  10   6   74.89   18.34
 -10  -2   6   87.31   18.44
 -10  -2   7   20.22   10.20
  -2  12   7    9.70    6.83
 -12  10   7   20.51   10.80
 -12  10   8   24.86   11.99
 -10  -2   8   12.52    6.08
  -2  12   8   -2.86    9.78
 -12  10   9   -2.01    8.33
 -10  -2   9   15.80    8.23
  -2  12  10   -2.96   13.36
 -10  -2  10    2.95    8.74
 -12  10  10  -15.13   15.07
  -2  12  11    6.15   10.39
 -10  -2  11   -4.18    6.32
 -12  10  11   19.64   14.38
 -10  -2  12   -1.11    7.69
  -2  12  12    1.24    8.26
 -12  10  13   20.27   13.73
 -10  -2  13   15.67   13.16
  -2  12  13   -1.33   12.61
 -10  -2  14   15.33   11.71
  -2  12  14   47.84   25.39
 -12  10  14   18.01   17.76
 -12  10  15    9.85   15.40
 -10  -2  15    4.70   10.56
  -2  12  15   10.13   18.68
 -10  -2  16   -5.93   12.26
  -3  12 -10    8.15    7.74
  -3  12  -8    6.01    4.36
  -3  12  -7   72.64   13.87
  -3  12  -6  157.12   18.21
   3 -12  -6  144.99   24.19
  -9  -3  -6  185.08   30.14
  -3  12  -5   79.04   10.81
   3 -12  -5   76.65   15.39
  -9  -3  -5   84.82   19.88
   9   3  -4  219.95   25.28
   3 -12  -4  205.36   24.37
  -3  12  -4  197.67   14.42
  -3  12  -3  107.75    8.29
   3 -12  -3  120.33   16.37
   9   3  -3  170.13   22.77
   9   3  -2   17.17    7.88
   9   3  -1  143.05   20.53
  -3  12  -1  115.74    8.56
  -3  12   0  165.94   13.08
  -3  12   1  152.36   15.13
  -3  12   2    1.79    6.06
  -3  12   3  158.81   18.76
  -3  12   3  151.44   20.40
  -3  12   4  229.55   21.96
  -3  12   4  206.66   25.62
 -12   9   4  168.18   12.30
  -3  12   5   56.26   14.54
  -3  12   6  167.67   26.29
 -12   9   6  169.49   27.83
  -9  -3   6  166.39   22.87
  -3  12   7   77.92   19.10
  -9  -3   7   74.14   16.29
 -12   9   7   89.66   21.61
  -9  -3   8   11.79    6.23
  -3  12   8    0.61   12.77
 -12   9   9    3.53    7.75
  -3  12   9   13.88    9.68
  -9  -3   9    9.21    7.50
  -9  -3  10   19.19   12.32
  -3  12  10    8.36    7.64
 -12   9  10    7.68   11.84
  -9  -3  11    6.67    6.85
 -12   9  11   11.53   10.07
  -3  12  11   16.53   11.22
 -12   9  12   14.21   12.57
  -3  12  12   -4.58   12.84
  -9  -3  12   -3.14    9.94
  -3  12  13    7.16   10.27
  -9  -3  13   11.80   10.75
 -12   9  13   -4.00    9.47
  -3  12  14    3.26   11.99
  -9  -3  14    8.15   14.63
 -12   9  14   17.92   16.16
  -3  12  15    9.26   22.35
  -9  -3  15    6.15   12.88
 -12   9  15    0.33   11.95
  -9  -3  16  -15.73   17.56
  -9  -3  17    8.26   14.09
  -4  12 -10    7.05    9.88
  -4  12  -8   -1.06    2.99
  -4  12  -7   79.68   14.92
  -4  12  -6  224.88   22.60
   4 -12  -6  256.96   31.98
  -8  -4  -6  268.82   35.95
   4 -12  -5   48.27   11.18
  -4  12  -5   44.73    9.15
  -8  -4  -5   52.68   16.71
  -4  12  -4   67.34    9.09
  -8  -4  -4   69.76   15.52
   4 -12  -4   57.14   12.32
   8   4  -3  375.98   33.33
  -4  12  -3  330.92   18.28
   8   4  -2   61.17   13.39
   8   4  -1  357.32   32.88
   8   4   0  196.54   24.66
  -4  12   0  195.48   15.17
  -4  12   1  346.54   23.85
  -4  12   2   53.58    9.94
  -4  12   3  385.89   31.45
  -4  12   4   86.34   12.53
 -12   8   4   70.04    8.23
  -4  12   4   65.22   14.45
  -4  12   5   49.28   13.23
  -8  -4   5   44.13   11.06
 -12   8   6  262.39   33.42
  -4  12   6  251.97   33.47
  -8  -4   6  224.10   25.93
  -8  -4   7   80.61   16.50
 -12   8   7   71.89   18.44
  -4  12   7   61.21   16.45
 -12   8   8   14.07    9.85
  -4  12   8    4.29    7.28
  -8  -4   8   -3.11   10.72
 -12   8   9    5.96   10.97
  -4  12   9  -14.28   15.09
  -8  -4   9   12.19    9.28
 -12   8  10   14.14   15.14
  -4  12  10   13.33   14.22
  -8  -4  10    5.99    9.04
 -12   8  11   -9.17   10.82
  -4  12  11  -12.78   14.38
  -8  -4  11   -0.20   10.17
  -4  12  12  -13.53   13.01
 -12   8  12   -2.80    8.79
  -8  -4  12   -4.33    7.84
  -4  12  13   11.56   15.42
 -12   8  13   14.18   15.83
  -8  -4  13    2.68   10.41
  -8  -4  14    7.13    8.96
  -4  12  14   -2.98   13.82
 -12   8  14    4.51    8.04
  -4  12  15   -0.51    9.27
  -8  -4  15   -9.62   11.33
  -8  -4  16   -4.91   10.58
  -8  -4  17    7.35   13.35
  -5  12 -10   17.58   10.42
  -5  12  -9   28.63   11.42
  -5  12  -7    8.76    6.14
  -7  -5  -6   17.96   10.59
  -5  12  -6   19.35    6.88
   5 -12  -6   23.97   11.27
  -7  -5  -5  105.66   21.05
  -5  12  -5  103.29   14.69
  -7  -5  -4    9.46    7.89
  -5  12  -4   18.52    6.01
  -7  -5  -3  213.15   25.13
   7   5  -2  134.42   19.10
   7   5  -1  123.65   19.45
   7   5   0   77.54   15.45
  -5  12   1  148.08   15.92
   7   5   1  151.49   21.29
  -5  12   2  133.42   17.19
 -12   7   3  218.18   18.29
  -5  12   3  234.12   24.54
  -5  12   4    8.79    4.08
  -5  12   4   13.31    4.80
  -5  12   5  117.55   20.95
  -7  -5   5  100.68   15.87
  -7  -5   6   14.36    6.83
  -5  12   6   27.14   11.57
 -12   7   6   15.06    7.46
  -5  12   7   25.60   11.85
  -7  -5   7   16.35    7.66
 -12   7   7   21.82    9.77
 -12   7   8   26.89   13.39
  -5  12   8   17.56    8.91
  -7  -5   8   27.00   10.78
 -12   7   9   16.50    9.15
  -7  -5   9   26.04   11.46
  -5  12   9   48.70   17.62
 -12   7  10   32.50   15.58
  -5  12  10    7.91   10.77
  -7  -5  10   18.40   11.95
 -12   7  11   14.16    8.13
  -5  12  11    9.52    7.70
  -7  -5  11   -3.67    7.71
  -5  12  12   -2.44    9.22
  -7  -5  12    5.92    6.91
 -12   7  12   -6.02   10.02
  -7  -5  13   14.39   10.86
  -5  12  13  -21.07   12.20
 -12   7  13   10.23   13.64
  -7  -5  14   14.85   12.41
  -5  12  14   -3.45    9.50
  -5  12  15   -2.43   10.70
  -7  -5  15   13.15   12.45
 -12   7  15   38.01   21.99
  -7  -5  16   -9.98   14.43
  -7  -5  17   16.18   16.03
  12  -6 -11    3.78    2.83
  -6  12  -9   70.99   17.47
  -6  -6  -7    7.14    6.14
  -6  12  -7   14.15    7.37
  -6  12  -6  160.37   21.24
  -6  -6  -6  157.64   26.36
  -6  12  -5   11.41    4.29
  -6  -6  -5   17.41    7.43
  -6  -6  -4    4.84    5.16
  -6  -6  -3  191.16   23.80
   6   6  -1   84.99   15.83
   6   6   0   71.41   16.81
   6   6   1   88.20   17.05
  -6  12   2   16.57    7.69
 -12   6   3  181.86   17.17
  -6  12   3  203.41   23.40
  -6  12   4   14.87    5.76
  -6  12   4    5.19    6.88
  -6  -6   5   10.66    5.76
  -6  12   5   -7.94    7.59
 -12   6   6  154.35   24.56
  -6  12   6  184.80   29.73
  -6  -6   6  151.81   19.93
 -12   6   7   30.12   14.37
  -6  12   7   30.26   14.09
  -6  -6   7   29.38   10.16
  -6  -6   8  139.13   22.59
 -12   6   8  154.43   28.34
  -6  12   8  147.18   28.76
  -6  -6   9   90.59   21.26
 -12   6   9   94.58   24.48
  -6  12   9   84.56   23.90
 -12   6  10   23.73    9.83
  -6  -6  10   34.03   14.29
  -6  12  10   62.35   22.05
  -6  12  11   -0.79    8.31
  -6  -6  11   10.09    8.45
 -12   6  11    4.90    9.37
  -6  12  12   16.02   15.19
  -6  -6  12   27.61   14.14
 -12   6  12   14.18   12.11
  -6  -6  13  -21.48   14.67
  -6  12  13   12.88   13.62
 -12   6  13  -10.02    8.79
  -6  12  14    6.60   12.08
 -12   6  14   27.20   21.04
  -6  -6  14    7.18   12.15
  -6  12  15  -17.51   16.94
  -6  -6  15   -5.10   11.29
 -12   6  15   -2.64    8.28
  -6  -6  16    5.21   10.33
  12  -5 -11   -5.50    4.16
  12  -5 -10    8.12    3.91
  -7  12  -9   18.64   11.20
  12  -5  -9   23.01    7.03
  -5  -7  -9   13.34    9.54
  -5  -7  -8    0.07    5.36
  12  -5  -8    0.82    2.82
  -5  -7  -7   26.44   10.69
  -7  12  -6   55.94   13.64
  -5  -7  -6   53.74   16.74
  -5  -7  -5    3.96    5.02
  -7  12  -5   11.56    6.18
  -5  -7  -4   78.51   16.39
  -5  -7  -3  240.26   26.39
  -5  -7  -2  551.42   37.04
   5   7  -1  396.68   34.26
   5   7   0  314.43   31.12
   5   7   1  376.89   32.99
 -12   5   2  541.12   32.95
  -7  12   2  597.14   36.37
   5   7   2  551.53   40.53
  -7  12   3  222.71   24.79
 -12   5   3  222.64   20.33
  -7  12   4   95.24   10.74
  -5  -7   4   72.86   10.78
  -7  12   4   86.75   17.13
  -7  12   5   -2.06    8.76
  -5  -7   5    7.15    3.77
 -12   5   6   59.79   17.60
  -5  -7   6   72.13   14.26
  -7  12   6   39.70   13.41
 -12   5   7   52.78   16.42
  -5  -7   7   41.67   12.64
  -7  12   7   47.92   17.46
 -12   5   8   -2.14    6.24
  -7  12   8   12.51   14.32
  -5  -7   8   21.74   11.17
  -5  -7   9   23.30   12.92
  -7  12   9   20.13   15.87
 -12   5   9   33.18   15.86
 -12   5  10   11.85    8.67
  -5  -7  10   18.45   11.80
  -7  12  10  -11.43    9.50
 -12   5  11   -3.67    9.20
  -5  -7  11   19.63   12.20
  -7  12  11  -16.41   12.69
  -7  12  12  -16.79   11.98
  -5  -7  12    9.24   10.84
 -12   5  12  -15.79   11.59
  -7  12  13   -3.83   12.17
  -5  -7  13   13.17    9.74
 -12   5  13    0.21    8.31
  -5  -7  14   -9.55   12.02
  -7  12  14   23.00   18.36
 -12   5  14   12.31   16.01
  -7  12  15    3.30   12.56
 -12   5  15   -7.89   12.62
  -5  -7  15   13.55   12.32
  -5  -7  16   -7.98   14.56
 -12   5  16   26.61   18.02
  12  -4 -11    4.49    4.27
  -4  -8 -10   15.45    9.85
  12  -4 -10   20.69    7.24
  -4  -8  -9   39.92   12.49
  -8  12  -9   28.79   13.56
  12  -4  -9   54.77   10.49
  -8  12  -8    9.92    8.20
  -4  -8  -8    5.59    7.40
  12  -4  -8    9.55    6.12
  12  -4  -7   58.95   10.89
  -4  -8  -6   91.13   19.90
  -8  12  -6   79.52   15.81
  -4  -8  -5   21.61    9.16
  -4  -8  -4  210.73   26.30
  -4  -8  -3   30.04    8.46
  -4  -8  -3   29.85   10.87
  -4  -8  -2  111.59   15.73
  -4  -8  -1  921.32   41.89
   4   8   0  235.40   26.78
   4   8   1  940.32   52.59
   4   8   2  155.35   22.49
 -12   4   2  127.25   16.83
 -12   4   3   43.14   10.00
  -8  12   3   36.62   10.96
  -4  -8   4  209.75   17.37
  -8  12   4  215.01   27.60
  -4  -8   5   20.09    6.53
  -8  12   5   17.34   10.55
  -8  12   6  107.71   21.34
  -4  -8   6   80.85   14.40
  -4  -8   7   44.60   11.31
 -12   4   7   62.68   16.70
  -8  12   7   47.61   13.66
 -12   4   8    7.86    9.56
  -4  -8   8    6.15    6.74
  -8  12   8   18.45   15.42
 -12   4   9   24.82   12.47
  -8  12   9   41.44   17.69
  -4  -8   9   44.56   13.83
 -12   4  10    3.80    9.89
  -4  -8  10    2.88    6.28
  -4  -8  11   -7.64    7.99
  -8  12  11  -11.78    9.15
 -12   4  11    8.66    8.35
  -4  -8  12   -4.34    8.87
 -12   4  12   23.83   15.97
  -8  12  12   23.29   17.05
  -4  -8  13   13.42    9.66
  -8  12  13   31.89   16.57
 -12   4  13   -7.48   11.39
  -4  -8  14    0.64    7.16
 -12   4  14    5.08   10.10
  -8  12  14    3.71    9.47
  -4  -8  15  -12.44    8.07
  -8  12  15    2.56    9.95
 -12   4  15   -4.44   12.21
 -12   4  16   35.92   21.96
  -4  -8  16   -3.16    8.00
  12  -3 -12   14.57    7.49
  12  -3 -11   -7.68    3.97
  -3  -9 -10   -2.39    8.14
  12  -3 -10   -3.70    5.34
  12  -3  -9   23.73    7.30
  -3  -9  -9    9.53    6.23
  12  -3  -8  136.15   18.05
  -9  12  -8  117.92   21.82
  12  -3  -7   14.24    6.18
  12  -3  -6   71.27   13.61
  -3  -9  -6   34.32   10.59
  -3  -9  -5  203.21   27.63
  -3  -9  -4  178.88   24.41
  -3  -9  -4   81.04   18.22
  -3  -9  -3    2.65    4.22
  -3  -9  -2  627.56   37.03
  -3  -9  -1   48.32    9.58
  -3  -9   0    9.51    4.10
   3   9   1   40.59   10.23
 -12   3   1   50.55   11.44
 -12   3   2  678.74   40.33
   3   9   2  684.98   44.82
   3   9   3   10.61    7.03
  -3  -9   3   13.69    3.38
  -3  -9   4  151.13   13.16
  -9  12   4  182.92   25.36
  -3  -9   5  170.39   16.76
  -9  12   5  192.68   27.94
  -9  12   6   56.71   16.69
  -3  -9   6   56.60   10.01
   3   9   6   45.82   13.04
  -9  12   7    4.55    6.20
  -3  -9   7    9.83    4.57
   3   9   7   -4.73   11.26
 -12   3   7   10.78   10.80
 -12   3   8  144.55   27.16
  -9  12   8  117.56   25.55
  -3  -9   8  125.03   20.11
   3   9   8  110.38   24.65
   3   9   9  -16.67   17.10
  -3  -9   9   -3.08    8.48
 -12   3   9    8.60   10.83
  -9  12   9    5.55   11.29
 -12   3  10    1.97    8.80
  -3  -9  10    9.30    6.96
   3   9  10   -0.45   11.11
  -9  12  10   19.19   16.68
  -3  -9  11    9.94   11.10
  -9  12  11    0.55    8.76
 -12   3  11   -3.26   10.07
  -9  12  12   -0.98   10.35
 -12   3  12   21.82   14.30
  -3  -9  12   -8.70    9.65
  -3  -9  13   11.15   10.56
 -12   3  13   17.60   16.44
  -9  12  13   37.62   20.91
 -12   3  14  -16.96   16.70
  -9  12  14   13.52   12.20
  -3  -9  14    1.51    9.57
  -9  12  15    0.14    8.88
 -12   3  15    0.75    9.62
 -12   3  16  -17.83   14.04
  12  -2 -12   -1.59    5.18
  12  -2 -11    8.73    6.25
  12  -2 -10   -8.20    8.93
  -2 -10 -10    8.38    8.47
  -2 -10  -9    6.60    6.96
  12  -2  -9    5.80    4.17
 -10  12  -8   61.54   15.22
  12  -2  -8   55.21   12.57
 -10  12  -7   44.97   14.76
  12  -2  -7   46.21   11.20
  12  -2  -6  112.66   17.43
  -2 -10  -6  111.44   22.99
  12  -2  -5   60.02   12.58
  -2 -10  -5   65.05   16.11
  -2 -10  -4   91.50   17.60
  -2 -10  -3   73.68   14.13
  -2 -10  -2  139.72   17.27
  -2 -10  -1   20.04    5.97
  -2 -10   0  138.98   12.33
 -12   2   0  144.60   20.05
  -2 -10   1   14.48    3.04
 -12   2   1   17.91    6.30
   2  10   1   15.60    5.57
   2  10   2  170.44   22.37
 -12   2   2  166.78   20.78
   2  10   3   61.79   12.59
 -10  12   4  107.20   20.18
   2  10   4   69.62   14.50
  -2 -10   4   62.90    7.93
  -2 -10   5   47.73    8.64
 -10  12   5   89.23   20.03
   2  10   5   59.24   14.55
   2  10   6   91.43   20.35
 -10  12   6  107.36   22.15
  -2 -10   6  105.21   14.20
 -10  12   7   40.86   15.17
  -2 -10   7   36.81   10.49
   2  10   7   43.46   16.80
 -12   2   7   48.47   15.93
   2  10   8   58.47   14.60
 -10  12   8   59.13   17.05
  -2 -10   8   51.42   12.26
 -12   2   8   66.78   18.99
 -12   2   9   -2.83    8.93
  -2 -10   9    1.49    5.17
 -10  12   9   16.57   14.21
   2  10   9    3.05    8.44
   2  10  10   13.62    8.46
 -12   2  10    1.63    9.83
  -2 -10  10    1.31    5.86
 -10  12  10   24.08   16.21
 -10  12  11    9.97    8.44
  -2 -10  11    7.19    7.79
   2  10  11   28.26   16.05
  -2 -10  12   -3.96    6.13
   2  10  12  -12.48   15.51
 -10  12  12   26.33   14.29
 -12   2  12    9.12   10.56
 -10  12  13  -13.41   15.52
 -12   2  13   -3.76    9.16
  -2 -10  13   10.46   13.49
 -12   2  14   -4.41    7.95
 -10  12  14   -8.36    8.40
 -12   2  15    9.93   11.72
 -10  12  15   -9.71   12.27
 -12   2  16    8.61   10.81
  -1 -11 -10   29.38   10.97
  12  -1 -10   28.08   10.60
  12  -1  -9   18.13    5.49
  12  -1  -8   45.82   12.37
 -11  12  -7   70.73   17.78
  12  -1  -7   64.72   13.97
  12  -1  -6  299.60   29.51
  -1 -11  -6  279.94   35.49
  12  -1  -5   48.36   12.32
  -1 -11  -5   44.16   11.74
  12  -1  -4   31.34    8.26
  -1 -11  -4   28.61   10.08
  -1 -11  -3  160.95   20.60
  -1 -11  -2  229.66   21.68
  -1 -11  -1   65.94    9.89
 -12   1   0   60.65   13.51
  -1 -11   0   39.21    5.35
 -12   1   1   91.04   16.83
   1  11   2  281.80   29.18
 -12   1   2  297.33   28.77
   1  11   3  175.74   22.38
   1  11   3  153.38   19.33
   1  11   4   29.46    8.69
   1  11   5   38.77   10.91
 -11  12   5   61.13   16.55
  -1 -11   6  256.49   22.05
 -11  12   6  282.31   36.07
   1  11   6  283.56   36.01
   1  11   7   67.13   18.65
 -11  12   7   85.09   21.74
 -12   1   7   86.00   19.90
  -1 -11   7   60.85   11.98
 -11  12   8   34.44   11.42
   1  11   8   33.98   13.70
 -12   1   8   51.11   16.63
  -1 -11   8   35.82   10.86
 -12   1   9    9.10    9.75
   1  11   9   -7.08    8.00
 -11  12   9    2.93    7.28
  -1 -11   9   12.33    7.15
 -12   1  10   25.12   10.13
   1  11  10   17.68   15.55
  -1 -11  10   22.59    9.46
 -11  12  10   35.44   15.73
 -11  12  11    1.33    7.35
 -12   1  11    3.23   10.72
   1  11  11   -2.18   14.77
   1  11  12  -33.48   17.07
 -12   1  12  -10.74   11.43
 -11  12  12   -5.01   13.32
 -12   1  13   -1.34    8.11
 -11  12  13    3.25   16.33
   1  11  13   18.12   18.83
 -11  12  14   15.54   17.47
   1  11  14    7.02   11.69
 -11  12  15    5.93    8.80
 -12   1  15  -13.02   13.88
 -12   1  16    8.46   11.74
  12   0  -9   -4.59    5.84
  12   0  -8   49.38   12.06
 -12  12  -7   58.50   16.33
  12   0  -7   74.73   15.43
  12   0  -6  265.86   29.63
   0 -12  -6  241.21   32.76
   0 -12  -5   99.17   19.61
  12   0  -5  107.61   18.98
   0 -12  -4   28.30    7.61
  12   0  -4   52.05   12.36
   0 -12  -3   34.03    8.33
  12   0  -3   45.51   12.60
   0 -12  -2  151.85   17.43
   0 -12  -1  128.73   13.67
 -12   0   0 1162.88   61.95
 -12   0   1  162.18   23.19
   0  12   2  171.23   22.28
   0  12   2  161.38   18.51
   0  12   3   37.33   10.77
   0  12   3   50.66   13.63
   0  12   4   25.72    7.77
   0  12   4   26.63    8.19
   0  12   5   99.39   20.50
 -12  12   5  116.41   22.40
 -12  12   6  246.39   33.35
   0  12   6  231.21   32.59
   0  12   7   51.89   17.33
 -12  12   7   92.53   22.30
 -12   0   7   82.34   18.94
 -12   0   8   95.77   22.52
   0  12   8   84.74   23.36
 -12  12   8   64.99   19.68
 -12  12   9   17.60   10.69
 -12   0   9    6.71    8.00
   0  12   9   -5.59    9.85
 -12   0  10    7.33    8.43
   0  12  10  -19.15   16.01
 -12  12  10   11.47   10.87
 -12  12  11   -2.25    8.56
 -12   0  11   -7.35    8.60
   0  12  11    0.42    9.55
   0  12  12   11.00    9.55
 -12   0  12   15.99   11.60
 -12  12  12    1.22    9.17
 -12  12  13   25.39   19.83
 -12   0  13    6.12    7.53
   0  12  13    0.63   10.92
 -12  12  14   17.24    9.73
 -12   0  14  -10.84   13.75
   0  12  14    1.05   14.21
 -12   0  15  -22.39   18.38
 -12  12  15   11.13   15.89
   0  12  15    5.76   12.55
 -12   0  16   -5.62   11.94
  12   1  -9   14.38    6.14
  12   1  -8  364.75   36.33
  12   1  -7   59.59   14.45
   1 -13  -6   22.67    9.27
  12   1  -6   28.94   11.94
   1 -13  -5    2.90    7.18
  12   1  -5   14.97    6.96
   1 -13  -4   41.46   11.10
  12   1  -4   38.63   11.28
  12   1  -3  149.98   22.07
   1 -13  -3  139.41   18.97
   1 -13  -2  119.57   15.36
 -12  -1   0   31.67   11.76
 -12  -1   1    5.56    4.32
  -1  13   1    9.59    3.34
  -1  13   2  137.13   17.21
  -1  13   3  190.72   23.14
  -1  13   3  186.91   23.30
  -1  13   4   38.53   10.68
  -1  13   4   40.13   10.52
  -1  13   5   20.99   10.35
 -13  12   6   28.68   13.14
  -1  13   6   11.86    8.64
 -13  12   7   91.72   23.55
 -12  -1   7   78.83   19.19
  -1  13   7   50.11   17.82
  -1  13   8  379.09   48.72
 -13  12   8  416.42   49.47
 -12  -1   8  400.71   43.86
 -13  12   9   34.83   16.51
 -12  -1   9   22.78   11.36
  -1  13   9   10.81    8.57
 -13  12  10   26.85   14.29
 -12  -1  10    8.54    8.25
  -1  13  10   17.74   12.35
  -1  13  11   24.04   15.29
 -12  -1  11   20.38   13.61
 -13  12  11   -0.26    7.87
 -13  12  12   21.32   20.31
 -12  -1  12    2.18    7.74
  -1  13  12   -0.02    9.16
  -1  13  13   15.36   14.09
 -13  12  13   21.67   15.24
 -12  -1  13   -8.16   12.78
  -1  13  14   28.08   21.75
 -12  -1  14   -1.87    7.36
 -13  12  14   28.56   20.36
 -12  -1  15   27.41   20.49
  -1  13  15   -0.14   10.76
 -13  12  15    3.81   14.26
 -12  -1  16   -8.64   17.42
  -2  13 -10    9.76    7.99
  -2  13  -8  190.98   22.91
  -2  13  -7    6.84    4.05
   2 -13  -6  110.04   21.29
  -2  13  -6  102.93   12.66
  11   2  -6  113.87   19.40
   2 -13  -5   67.65   15.29
  11   2  -5   88.15   17.19
  -2  13  -5   68.25    8.60
 -11  -2  -5   81.13   20.11
  11   2  -4  185.76   24.69
   2 -13  -4  193.95   24.52
   2 -13  -3   13.14    6.47
  11   2  -3   31.59   12.83
   2 -13  -2   52.33   10.12
  11   2  -2   66.86   15.80
  -2  13   0   18.74    4.50
  -2  13   1  113.70   13.48
 -11  -2   1  108.01   19.03
  -2  13   2   57.35   10.78
  -2  13   3   25.93    9.68
  -2  13   3   15.94    7.93
  -2  13   4  197.93   22.68
  -2  13   4  181.90   24.29
  -2  13   5   76.65   16.68
 -11  -2   6  122.58   20.97
  -2  13   6  110.04   22.22
 -13  11   6  122.59   23.78
 -11  -2   7    6.37    7.92
  -2  13   7    1.78    7.26
 -13  11   7    5.38    5.84
 -11  -2   8  228.53   33.21
 -13  11   8  254.55   38.65
  -2  13   8  220.10   39.50
 -11  -2   9  -11.63   11.60
  -2  13   9   -4.27   10.24
 -13  11   9   -6.43    8.79
 -13  11  10   -2.07    8.26
  -2  13  10   19.38   14.99
 -11  -2  10   26.09   13.31
  -2  13  11   20.68   16.68
 -11  -2  11    2.79    9.98
 -13  11  11    5.20   10.58
 -11  -2  12   27.02   14.96
  -2  13  12   21.54   16.35
 -13  11  12   14.27   14.72
 -11  -2  13    6.09   10.09
 -13  11  13    5.47   14.10
  -2  13  13  -14.56   19.26
 -11  -2  14   -7.35   11.54
  -2  13  14   -5.79   15.22
 -13  11  14    9.34   17.66
 -13  11  15   -0.54   11.67
  -2  13  15   22.24   15.12
 -11  -2  16    1.38    8.81
  -3  13 -10   30.55   11.41
  -3  13  -8   77.35   14.64
  -3  13  -7   -3.03    5.62
  -3  13  -6    3.79    4.03
   3 -13  -6  -10.56   11.89
  10   3  -5    8.55    4.68
 -10  -3  -5   -0.18    8.40
   3 -13  -5    8.53    6.01
  -3  13  -5   12.22    4.97
  10   3  -4  395.71   35.74
  -3  13  -4  286.81   15.52
   3 -13  -4  361.66   33.36
  10   3  -3  106.48   19.30
   3 -13  -3  100.19   16.59
  10   3  -2  173.61   24.27
  -3  13  -1  218.79   11.69
  10   3  -1  307.58   31.27
  -3  13   0    8.95    3.42
  -3  13   1  297.57   22.36
  -3  13   2  150.07   17.86
  -3  13   3  122.58   19.45
  -3  13   3  108.86   15.87
  -3  13   4  399.35   36.17
  -3  13   4  387.33   29.96
 -13  10   4  309.07   18.06
  -3  13   5   -2.65    7.53
  -3  13   6    3.98    7.99
 -10  -3   6   14.90    8.59
 -10  -3   7    0.91    5.85
 -13  10   7   16.88   12.70
  -3  13   7    4.54    6.31
 -10  -3   8   67.20   17.01
 -13  10   8   86.28   22.51
  -3  13   8   92.63   25.19
  -3  13   9    2.69   10.15
 -10  -3   9   20.45    7.86
 -13  10   9   10.35    7.71
 -13  10  10   19.06   11.77
  -3  13  10   19.23   12.30
 -10  -3  10   42.01   16.18
  -3  13  11    2.01   14.19
 -10  -3  11   10.77   11.76
 -13  10  11   17.44   16.56
  -3  13  12   12.22   14.31
 -10  -3  12   -0.37    8.17
 -13  10  12   21.33   20.26
  -3  13  13   30.60   19.54
 -10  -3  13   10.24   13.08
 -13  10  13   27.07   16.80
  -3  13  14  -16.75   14.49
 -10  -3  14    5.06    8.55
 -13  10  14   26.58   19.37
 -13  10  15  -19.47   14.61
 -10  -3  15    8.70   10.19
  -3  13  15   12.60   15.48
 -10  -3  16   13.56   17.21
  -4  13 -10   94.21   19.75
  -4  13  -8   24.16    8.06
  -4  13  -7  106.96   17.19
  -4  13  -6  171.68   19.26
   4 -13  -6  182.97   27.01
   4 -13  -5  354.17   35.06
  -4  13  -5  331.95   22.68
  -9  -4  -5  372.67   39.20
  -9  -4  -5  386.58   41.39
  -9  -4  -4  116.98   21.64
   9   4  -4  142.50   21.35
  -4  13  -4  112.17   11.23
   9   4  -3  124.17   20.05
  -4  13  -3  101.17    9.42
   9   4  -2  465.47   39.57
  -4  13  -1  216.78   13.39
   9   4  -1  252.67   28.77
   9   4   0   15.20    8.25
  -4  13   0   30.39    6.91
  -4  13   1  235.79   20.41
  -4  13   2  453.20   31.13
  -4  13   3  116.32   17.41
 -13   9   4   94.64   10.40
  -4  13   4  128.90   20.01
  -4  13   4  147.42   17.79
  -4  13   5  362.53   37.23
  -4  13   6  170.29   27.07
  -9  -4   6  178.22   23.31
 -13   9   6  198.50   30.18
 -13   9   7  115.50   25.92
  -4  13   7  103.70   21.47
  -9  -4   7  107.24   19.44
 -13   9   8   61.26   18.85
  -4  13   8   41.45   14.76
  -9  -4   8   47.69   12.28
 -13   9   9    4.10    8.22
  -9  -4   9    2.87    6.62
  -4  13  10   90.96   25.70
 -13   9  10  112.75   26.99
  -9  -4  10   89.22   21.62
  -9  -4  11   14.10   11.75
 -13   9  11   12.43    7.44
  -4  13  12    7.38    8.50
 -13   9  12    7.21    9.49
  -9  -4  12   22.11   14.48
  -9  -4  13   34.15   16.92
  -4  13  13   -4.94   14.65
 -13   9  13    9.83    8.08
  -4  13  14   16.70   16.08
 -13   9  14   26.26   16.93
  -9  -4  14    8.40    9.62
  -4  13  15   17.22   20.87
  -9  -4  15  -25.56   15.10
 -13   9  15   -6.10    9.32
  -9  -4  16   32.35   23.65
  -5  13 -10   29.87   11.65
  -5  13  -7   45.41   11.25
  -8  -5  -6    4.42    7.06
  -5  13  -6   13.39    6.52
   5 -13  -6   27.60   10.93
  -8  -5  -6   10.33    7.80
  -8  -5  -5   35.24   11.91
  -8  -5  -5   43.10   13.57
  -5  13  -5   49.62    9.63
  -8  -5  -4   27.88   11.13
  -5  13  -4   38.62    8.27
   8   5  -3   -1.24    7.71
   8   5  -2  123.54   19.79
   8   5  -1  499.52   40.76
   8   5   0  168.84   23.28
  -5  13   0  155.66   14.63
  -5  13   1  485.21   29.44
  -5  13   2  136.97   17.02
  -5  13   3  -17.22   10.93
 -13   8   4   31.42    6.63
  -5  13   4   40.76    9.38
  -5  13   4   31.71   11.31
  -5  13   5   42.08   12.61
  -8  -5   5   52.73   11.96
  -8  -5   6   16.81    9.53
  -5  13   6   18.75   10.62
 -13   8   6   41.73   15.66
  -8  -5   7   39.17   11.74
  -5  13   7   50.26   17.35
 -13   8   7   56.95   17.71
 -13   8   8   72.35   20.97
  -8  -5   8   38.26   11.07
  -5  13   8   56.13   15.48
 -13   8   9    2.31    8.18
  -8  -5   9   18.54   10.07
  -5  13   9   -7.43   10.31
  -5  13  10   41.66   17.33
  -8  -5  10   53.40   17.22
 -13   8  10   67.97   22.42
  -5  13  11   -1.76   11.15
  -8  -5  11  -16.52   11.79
 -13   8  11   -5.32   16.13
  -5  13  12   12.15   14.22
  -8  -5  12   17.76   13.66
 -13   8  12   16.06   11.77
  -5  13  13   18.65   18.34
  -8  -5  13    4.40   11.61
 -13   8  13   -0.94    8.36
  -5  13  14    4.39    8.87
  -8  -5  14   -9.39    8.71
  -5  13  15   13.61   13.19
 -13   8  15  -13.91   15.62
  -8  -5  15    3.71   10.01
  -8  -5  16   12.47   14.14
  -6  13 -10   -1.22    6.97
  -6  13  -9   25.25   10.26
  -7  -6  -7   30.66   12.15
  -6  13  -7   39.32   12.21
  -7  -6  -6   33.51   13.29
  -6  13  -6   29.04    9.30
  -7  -6  -6   26.95   13.43
  -7  -6  -5  189.96   26.70
  -6  13  -5  175.97   19.57
  -7  -6  -5  173.29   26.30
  -6  13  -4   91.09   12.98
  -7  -6  -4  103.58   20.69
  -7  -6  -3  246.91   28.21
   7   6  -2  485.61   39.42
   7   6  -1  127.29   21.25
   7   6   0   13.10    7.51
   7   6   1  150.41   23.78
  -6  13   1  131.00   16.12
  -6  13   2  494.20   33.83
 -13   7   3  247.42   20.86
  -6  13   3  246.31   26.25
  -6  13   4  113.25   18.85
  -6  13   4  101.73   13.00
  -6  13   5  181.07   26.02
  -7  -6   5  168.28   19.57
  -7  -6   6   27.24    9.34
  -6  13   6   24.17   13.27
  -7  -6   7   36.37   10.87
 -13   7   7   48.80   16.73
  -6  13   7   42.80   15.21
 -13   7   8   74.29   20.94
  -6  13   8   73.91   21.41
  -7  -6   8   71.93   17.85
  -6  13   9   30.24   15.71
 -13   7   9   25.81   12.85
  -7  -6   9   41.50   15.69
 -13   7  10    3.59    9.71
  -6  13  10  -15.47   11.00
  -7  -6  10   -0.11    5.97
  -6  13  11   13.09   11.11
  -7  -6  11    0.45    6.12
 -13   7  11   -2.33    7.72
 -13   7  12   -1.71    7.74
  -7  -6  12    8.20   12.11
  -6  13  12  -15.68   14.77
  -7  -6  13   10.23    9.96
  -6  13  13    3.47    8.38
 -13   7  13    6.54   11.93
  -7  -6  14    0.66   10.14
  -6  13  14   18.02   16.60
 -13   7  14   12.21   12.32
  -7  -6  15   18.30   15.11
 -13   7  15    6.93   14.38
  -6  13  15   -2.21   12.34
  -7  -6  16    4.86   14.97
  -7  13  -9   15.46    8.37
  -6  -7  -8   53.39   14.63
  -6  -7  -7   78.79   18.65
  -7  13  -7   40.03   12.46
  -7  13  -6  235.31   26.18
  -6  -7  -6  250.44   33.95
  -6  -7  -6  238.00   31.37
  -6  -7  -5  122.02   21.96
  -7  13  -5  100.58   15.27
  -6  -7  -4  252.12   30.28
  -6  -7  -3   -1.76    6.63
  -6  -7  -2   39.21   11.98
   6   7  -1  151.03   21.99
   6   7   0    4.62    6.51
   6   7   1  140.95   21.88
  -7  13   2   61.25   13.25
  -7  13   3    4.61    4.01
 -13   6   3    6.32    4.69
  -6  -7   4  250.21   20.37
  -7  13   4  260.05   29.52
  -7  13   5  108.37   20.62
  -6  -7   5  105.76   14.84
  -7  13   6  239.05   32.50
  -6  -7   6  236.17   25.16
  -7  13   7   84.62   21.27
 -13   6   7   82.76   19.66
  -6  -7   7   84.98   16.42
 -13   6   8   82.79   20.82
  -7  13   8  110.97   25.89
  -6  -7   8  129.39   21.92
 -13   6   9   18.51   12.85
  -6  -7   9   22.04   12.11
  -7  13   9   27.48   16.75
  -7  13  10    3.43   10.87
 -13   6  10   -3.79    8.64
  -6  -7  10   11.40    9.51
  -6  -7  11   13.77   11.54
  -7  13  11   -1.10    9.74
 -13   6  11   -1.67   11.75
  -7  13  12   24.59   15.90
  -6  -7  12   26.79   14.76
 -13   6  12    2.49    9.52
  -6  -7  13    7.50   10.20
  -7  13  13   -4.41   11.53
 -13   6  13    3.61   11.56
 -13   6  14   17.88   13.32
  -7  13  14   -7.84   13.78
  -6  -7  14    3.90    7.68
  -6  -7  15    1.32    8.84
 -13   6  15    5.48    8.66
  -7  13  15   -5.34   16.74
  -6  -7  16  -10.50    8.43
  13  -5 -11   -0.77    3.01
  13  -5 -10   28.46    7.73
  -8  13  -9   63.40   17.84
  -5  -8  -8   31.80   11.78
  -5  -8  -7    0.33    7.08
  -5  -8  -6  216.09   32.22
  -5  -8  -6  210.41   28.92
  -8  13  -6  189.70   24.42
  -5  -8  -5   73.19   17.53
  -5  -8  -4  216.17   27.58
  -5  -8  -3  172.29   22.32
  -5  -8  -2  716.92   43.03
  -5  -8  -1  160.48   18.15
   5   8  -1  174.04   23.77
   5   8   0    9.54    6.54
   5   8   1  176.86   23.78
 -13   5   2  684.06   39.72
   5   8   2  724.67   47.59
 -13   5   3  183.70   19.63
  -8  13   3  194.56   23.74
  -5  -8   4  227.41   18.57
  -8  13   4  249.57   29.45
  -8  13   5   65.36   14.98
  -5  -8   5   71.72   11.92
  -8  13   6  192.87   30.49
  -5  -8   6  186.15   21.87
  -5  -8   7   22.33    9.46
 -13   5   7   23.81   12.58
  -8  13   7   32.26   16.16
 -13   5   8   40.23   14.41
  -5  -8   8   37.58   12.20
  -8  13   8   28.77   15.25
  -5  -8   9   54.53   15.03
  -8  13   9   50.32   19.52
 -13   5   9   60.92   18.59
 -13   5  10   50.31   18.75
  -8  13  10   46.70   19.16
  -5  -8  10   31.40   11.68
  -5  -8  11   -4.11    7.23
  -8  13  11   -8.04   12.45
 -13   5  11  -11.01   12.20
  -5  -8  12   29.63   14.76
  -8  13  12   33.01   17.31
 -13   5  12   16.11   10.32
  -5  -8  13    4.71    6.52
 -13   5  13   11.56    9.42
  -8  13  13   15.84   15.03
  -5  -8  14   18.96   16.19
  -8  13  14   22.18   20.28
 -13   5  14    8.32   14.06
  -8  13  15   -6.42   16.16
 -13   5  15   13.35   11.73
  -5  -8  15   12.85   17.01
  -5  -8  16    2.68    9.17
  13  -4 -11    7.89    6.08
  13  -4 -10   10.46    6.39
  -9  13  -9   11.05    8.55
  13  -4  -9   24.65    8.23
  -4  -9  -9   18.95    9.09
  -4  -9  -8  204.05   29.18
  -9  13  -8  172.64   26.84
  13  -4  -8  180.53   20.28
  -4  -9  -7   98.76   20.10
  -4  -9  -6  284.96   35.91
  -9  13  -6   57.27   15.70
  -4  -9  -5  361.21   38.14
  -4  -9  -4   89.75   17.75
  -4  -9  -3   38.88   10.04
  -4  -9  -2  139.45   18.53
  -4  -9  -1   88.34   13.04
   4   9   0  123.72   18.55
  -4  -9   0  115.11   12.87
   4   9   1  101.99   19.21
 -13   4   1   83.23   14.31
   4   9   2  155.87   23.21
 -13   4   2  165.52   20.51
  -4  -9   3   45.43    6.66
 -13   4   3   41.55    9.48
  -9  13   3   57.66   12.93
  -4  -9   4   87.67   10.87
  -9  13   4   95.31   18.62
  -4  -9   5  319.68   23.14
  -9  13   5  335.98   37.08
  -4  -9   6  239.97   23.17
  -9  13   6  280.03   35.50
  -4  -9   7   94.13   15.80
 -13   4   7  103.63   22.83
  -9  13   7  104.83   22.50
  -4  -9   8  159.32   22.85
  -9  13   8  212.10   34.67
 -13   4   8  175.75   30.61
 -13   4   9   13.81    8.93
  -4  -9   9   10.17    6.33
  -9  13  10   22.77   15.66
 -13   4  10    1.15    8.89
  -4  -9  10   12.39    9.69
  -4  -9  11   20.50   11.02
  -9  13  11   19.34   10.52
 -13   4  11  -10.53   10.82
  -4  -9  12    2.55    6.99
  -9  13  12    1.25    8.95
 -13   4  12   22.83   15.59
  -9  13  13  -13.68   10.85
 -13   4  13    3.23    8.17
  -4  -9  13  -29.42   17.18
  -9  13  14   -4.22   13.45
  -4  -9  14   -7.68    8.66
 -13   4  14    5.44    8.61
  -4  -9  15   -3.13    7.21
  -9  13  15   -1.82   14.21
 -13   4  15   -5.10   10.59
 -13   4  16   -3.76   14.51
  13  -3 -11    6.21    5.62
  13  -3 -10   47.73   11.65
  -3 -10 -10   74.87   19.84
  -3 -10  -9   24.17   11.02
  13  -3  -9   21.67    8.42
 -10  13  -8   40.99   13.13
  -3 -10  -8   41.09   13.78
  13  -3  -8   45.30   11.61
  13  -3  -7   35.14   10.52
  13  -3  -6   48.04   12.39
  -3 -10  -6   52.62   15.40
  -3 -10  -5    7.36    9.71
  -3 -10  -4  100.21   19.13
  -3 -10  -3  154.61   20.29
  -3 -10  -2  383.04   29.47
  -3 -10  -1  259.82   21.44
  -3 -10   0   48.12    8.06
 -13   3   1  276.99   27.44
   3  10   1  280.03   29.33
  -3 -10   1  227.92   14.18
 -13   3   2  421.04   33.85
   3  10   2  418.87   36.17
   3  10   3  158.08   21.77
  -3 -10   3  125.96    9.00
  -3 -10   4   81.25    9.19
 -10  13   4  112.28   19.98
  -3 -10   5   10.95    4.71
 -10  13   5    9.25    9.30
 -10  13   6   51.94   17.39
  -3 -10   6   28.50    7.28
 -10  13   7   34.23   15.10
  -3 -10   7   19.82    6.13
 -13   3   7   32.08   15.03
   3  10   7   29.25   12.24
 -13   3   8   57.35   17.80
  -3 -10   8   26.10    9.92
 -10  13   8   37.59   13.58
   3  10   8    7.44   12.41
  -3 -10   9   22.80   10.27
 -13   3   9   31.01   15.53
   3  10   9   12.28    8.53
 -10  13   9   34.15   16.69
 -13   3  10   57.69   16.30
  -3 -10  10   77.27   20.48
 -10  13  10   70.44   22.78
 -13   3  11   13.91   10.76
 -10  13  11    8.05   14.44
  -3 -10  11   13.15    6.41
  -3 -10  12   16.81   16.10
 -10  13  12    0.04    8.85
 -13   3  12   -2.29   10.47
  -3 -10  13    3.63    6.49
 -10  13  13   -2.75   10.72
 -13   3  13   11.33   12.43
 -10  13  14   -7.53   12.36
 -13   3  14    9.71   10.49
  -3 -10  14   -3.40    9.44
 -10  13  15   -0.02   14.43
 -13   3  15   10.81   13.17
 -13   3  16    4.69   10.98
  13  -2 -12    3.22    6.02
  13  -2 -11   33.47   10.51
  -2 -11 -10   10.25    8.34
  13  -2 -10   15.52    7.29
  13  -2  -9   16.94    8.36
  -2 -11  -9   21.03    9.97
 -11  13  -8   46.11   15.30
  -2 -11  -8   21.92   10.23
  13  -2  -8   27.91    9.15
 -11  13  -7   66.96   16.91
  13  -2  -7   76.30   14.85
  13  -2  -6   13.35    7.48
  -2 -11  -6    9.05   10.20
  -2 -11  -5   96.80   19.92
  13  -2  -5   72.91   14.10
  -2 -11  -4   52.48   14.23
  -2 -11  -3  149.26   20.89
  -2 -11  -2   22.24    8.04
  -2 -11  -1  188.21   17.75
  -2 -11   0   14.57    4.92
 -13   2   0    9.16    5.49
 -13   2   1  198.43   24.34
   2  11   1  199.73   24.56
   2  11   2   26.17   11.46
 -13   2   2   17.51    8.29
   2  11   3  133.45   20.29
 -11  13   4   47.05   14.78
  -2 -11   4   24.77    4.25
  -2 -11   5   58.93    8.91
   2  11   5   63.77   14.13
 -11  13   5   92.68   20.56
   2  11   6   -6.91    9.42
  -2 -11   6    1.80    4.41
 -11  13   7   79.97   20.15
 -13   2   7   91.09   20.34
  -2 -11   7   77.61   13.22
   2  11   7   73.34   18.04
 -11  13   8   35.81   13.58
   2  11   8    0.19   14.02
 -13   2   8   31.16   13.93
  -2 -11   8    9.93    5.94
   2  11   9   18.55   11.42
  -2 -11   9   25.24   10.98
 -13   2   9   31.79   14.61
 -11  13   9   24.68   15.41
  -2 -11  10   17.05    8.68
 -13   2  10   -5.43    8.22
   2  11  10   26.07   15.25
 -11  13  10   18.02   12.07
   2  11  11    0.78   10.02
  -2 -11  11   22.21   12.22
 -11  13  11   25.25   14.05
 -13   2  11   19.82   12.16
  -2 -11  12   -2.98    8.77
 -11  13  12   19.56   12.81
   2  11  12  -11.92   13.92
 -13   2  12   -4.43    8.21
 -11  13  13  -33.61   19.41
 -13   2  13    5.70    9.84
 -13   2  14    5.39   11.95
 -11  13  14    9.44   16.64
 -13   2  15   -5.54   13.48
 -11  13  15   15.15   16.52
 -13   2  16    8.22   16.06
  13  -1 -12   21.66   10.25
  13  -1 -11   11.63    6.19
  -1 -12 -10    7.32    7.59
  13  -1 -10    9.60    7.42
  -1 -12  -9   82.48   18.22
  13  -1  -9   55.35   13.90
  13  -1  -8    8.11    9.11
 -12  13  -7   14.59    8.82
  13  -1  -7   16.22    7.20
  -1 -12  -6   73.10   17.22
  13  -1  -6   86.97   17.15
  13  -1  -5   22.06    9.65
  -1 -12  -5   36.56   11.28
  -1 -12  -4   90.63   17.76
  -1 -12  -3  208.18   23.65
  -1 -12  -2   -4.54    8.84
  -1 -12  -1  117.88   13.95
 -13   1  -1  126.36   22.17
  -1 -12   0   96.88    9.67
 -13   1   0  123.05   20.16
 -13   1   1  147.90   22.91
   1  12   2   21.17    9.33
 -13   1   2   36.51   11.70
   1  12   3  218.84   26.61
   1  12   3  197.16   23.48
   1  12   4   96.27   17.80
   1  12   4  109.33   18.54
   1  12   5   19.03    9.38
 -12  13   5   43.63   15.48
   1  12   6   73.53   17.89
 -12  13   6  108.42   23.79
   1  12   7   11.43    6.64
 -12  13   7   17.65   10.41
 -13   1   7   38.20   14.30
   1  12   8   -1.23    9.19
 -13   1   8   20.49   12.20
 -12  13   8    9.56   11.33
 -12  13   9   71.85   21.74
 -13   1   9   81.50   20.36
   1  12   9   65.99   21.28
   1  12  10    2.46    9.74
 -13   1  10  -12.04   14.67
 -12  13  10    5.21    7.90
 -12  13  11   31.16   17.20
 -13   1  11   -8.92   11.33
   1  12  11   17.54   12.59
 -12  13  12   17.41   16.97
   1  12  12    0.15    9.38
 -13   1  12   21.16   15.73
 -12  13  13   -3.37   10.36
 -13   1  13   27.37   16.34
   1  12  13   12.57   11.20
 -12  13  14    7.97   14.52
 -13   1  14  -13.18   15.08
 -12  13  15   10.87   15.45
 -13   1  15    6.16   15.59
 -13   1  16   11.47   12.43
  13   0 -12   -0.31    4.86
  13   0 -11    5.75    5.27
  13   0 -10   29.67   11.56
  13   0  -9    8.47    7.34
  13   0  -8  145.73   23.38
  13   0  -7   -3.09    5.48
   0 -13  -6    2.93    5.61
  13   0  -6   19.71   10.59
   0 -13  -5  227.84   30.13
  13   0  -5  219.95   27.21
   0 -13  -4   34.18   10.65
  13   0  -4   35.03   11.54
   0 -13  -3  129.86   18.43
   0 -13  -2  349.17   27.44
   0 -13  -1   51.27    8.52
 -13   0   0   86.68   18.79
 -13   0   1   77.99   16.05
   0  13   2  354.87   32.93
   0  13   2  343.16   27.66
   0  13   3  147.98   22.03
   0  13   3  127.60   18.96
   0  13   4   46.80   13.43
   0  13   4   25.52    8.22
 -13  13   5  224.98   30.26
   0  13   5  233.71   31.37
   0  13   6   -2.12    9.76
 -13  13   6   23.63   13.32
   0  13   7   14.85   10.90
 -13  13   7   12.00    9.74
 -13   0   7   21.78   12.82
   0  13   8  126.92   28.96
 -13  13   8  183.26   34.65
 -13   0   8  167.25   29.00
 -13   0   9   28.58   12.25
 -13  13   9    6.53    8.80
   0  13   9    6.54   11.74
 -13   0  10   45.23   16.83
   0  13  10   26.58   14.84
 -13  13  10   13.49   17.41
   0  13  11   15.14   11.05
 -13  13  11   17.42   13.96
 -13   0  11   -5.85   13.16
 -13  13  12   24.01   16.68
 -13   0  12   -8.35    9.59
   0  13  12    5.19   11.82
   0  13  13    8.45    8.80
 -13  13  13   14.20   15.60
 -13   0  13    8.90    8.33
 -13  13  14    5.26   10.49
   0  13  14    6.67   15.76
 -13   0  14  -11.05   12.93
 -13   0  15  -10.58   12.29
 -13   0  16   38.33   18.75
  13   1 -12    2.45    7.57
  13   1 -11   12.46    7.67
  13   1 -10   31.45   11.48
  13   1  -9    5.48    7.87
  13   1  -8   27.78   13.10
  13   1  -7   24.85   10.70
  13   1  -6   15.24    7.75
   1 -14  -6   -5.35    9.82
  13   1  -5    9.36    5.25
   1 -14  -5   -1.94    6.60
  13   1  -4  142.87   22.38
   1 -14  -4  136.44   21.29
   1 -14  -3  -10.96    8.04
  13   1  -3   -8.44    6.65
   1 -14  -2  320.98   26.24
 -13  -1   0  101.75   20.19
 -13  -1   1  263.90   30.53
  -1  14   1  239.54   20.20
  -1  14   2  375.81   29.94
  -1  14   2  350.21   33.14
  -1  14   3    5.27    5.73
  -1  14   3  -16.24   10.30
  -1  14   4  127.41   19.85
  -1  14   4  125.83   20.64
  -1  14   5  -22.03   12.62
  -1  14   6   -8.18    9.02
 -14  13   6   12.41   11.02
  -1  14   7   21.58   11.78
 -13  -1   7   42.06   15.35
 -14  13   7   52.43   19.53
  -1  14   8   33.21   15.41
 -13  -1   8   50.40   17.47
 -14  13   8   37.14   15.87
  -1  14   9    2.10   12.64
 -14  13   9   14.63   10.69
 -13  -1   9   20.18   12.17
 -14  13  10   26.59   12.42
  -1  14  10   40.85   17.78
 -13  -1  10   26.05   13.62
 -13  -1  11  -12.68   11.68
 -14  13  11    5.24   12.37
  -1  14  11  -13.02   13.56
  -1  14  12   12.40   14.63
 -13  -1  12   39.05   18.80
 -14  13  12    0.30    9.15
  -1  14  13   43.86   24.82
 -13  -1  13   13.22   13.15
 -14  13  13   36.63   21.15
 -13  -1  14   15.11   11.41
 -14  13  14    0.24   12.68
  -1  14  14   -7.63   13.31
 -13  -1  15   11.54   11.71
 -13  -1  16  -24.31   19.97
  -2  14  -9    0.17    3.20
  12   2  -8  126.24   23.63
  -2  14  -8  122.40   18.28
  12   2  -7    2.34    8.69
  -2  14  -7    2.81    3.07
   2 -14  -6   43.83   14.85
  12   2  -6   59.43   14.93
  12   2  -5   -1.01    7.22
   2 -14  -5  -14.27    9.42
   2 -14  -4   -8.13    7.84
  12   2  -4    2.49    5.27
  12   2  -3  102.48   19.29
   2 -14  -3   94.33   15.49
  12   2  -2  182.96   25.97
 -12  -2   0  167.42   24.56
  -2  14   0  136.45   11.98
 -12  -2   1   58.38   14.62
  -2  14   1   39.29    7.70
  -2  14   2  164.12   19.99
  -2  14   3  128.69   20.07
  -2  14   3  109.31   18.44
  -2  14   4    8.62    5.45
  -2  14   4    6.50    6.68
  -2  14   5    3.12    6.24
 -14  12   6   69.01   17.96
  -2  14   6   40.85   12.80
 -14  12   7   10.42   14.00
 -12  -2   7    8.87   10.52
  -2  14   7   14.10   12.56
  -2  14   8  129.84   29.43
 -14  12   8  117.51   27.83
 -12  -2   8  131.00   25.88
 -12  -2   9   -3.72   10.41
 -14  12   9   18.67   10.81
  -2  14   9   -8.77   11.46
  -2  14  10   27.19   16.08
 -12  -2  10   19.85   12.74
 -14  12  10   16.30   11.51
  -2  14  11   -2.09   12.17
 -12  -2  11   19.67   13.58
 -14  12  11    2.76   10.19
  -2  14  12    4.43   10.18
 -12  -2  12   12.48   11.32
 -14  12  12   19.83   17.38
  -2  14  13    7.16   11.93
 -12  -2  13   24.04   14.41
 -14  12  13   -1.13    9.82
  -2  14  14   12.50   12.02
 -12  -2  14   26.07   16.29
 -14  12  14   41.51   20.84
  -2  14  15   33.79   23.20
 -12  -2  15    0.89   11.05
 -12  -2  16  -33.32   19.18
  -3  14 -10   28.86   11.39
  -3  14  -8   38.32   10.44
  -3  14  -7   98.08   14.57
  11   3  -6   21.53   10.37
   3 -14  -6   21.39    8.72
  -3  14  -6   11.33    4.52
  -3  14  -5   36.78    6.46
   3 -14  -5   42.77   12.33
  11   3  -5   46.82   14.55
 -11  -3  -5   49.82   15.63
  11   3  -4   -1.98    5.02
   3 -14  -4    6.55    8.23
  11   3  -3   57.16   14.84
  11   3  -2   97.24   19.14
  -3  14  -1   64.17    6.17
  -3  14   0   22.58    5.16
  -3  14   1  100.25   13.27
  -3  14   2   73.29   12.93
  -3  14   3   80.72   15.50
  -3  14   3   61.09   11.97
  -3  14   4    1.25    5.04
  -3  14   4    7.90    6.32
  -3  14   5   48.21   12.89
  -3  14   6    7.68    7.98
 -11  -3   6   31.86   11.68
 -14  11   6   34.25   14.03
 -11  -3   7  118.25   21.86
  -3  14   7  122.15   26.65
 -14  11   7  137.29   29.10
 -11  -3   8   34.97   14.65
 -14  11   8   58.09   19.96
  -3  14   8   71.73   23.08
 -14  11   9    8.30    8.14
  -3  14   9   -8.80   12.05
 -11  -3   9  -12.73   13.35
 -14  11  10    4.20    9.66
  -3  14  10   10.05    8.90
 -11  -3  10   17.53    8.69
  -3  14  11   -7.37   11.76
 -11  -3  11   -7.43   10.60
 -14  11  11  -23.94   16.29
  -3  14  12    7.74   14.11
 -11  -3  12  -16.09   12.77
 -14  11  12   18.53   15.81
  -3  14  13  -13.35   13.45
 -11  -3  13    3.13    9.16
 -14  11  13   -0.32   10.85
  -3  14  14   12.21   12.73
 -14  11  14   27.09   24.06
 -11  -3  14    4.50   11.09
  -3  14  15  -10.06   16.59
 -11  -3  15  -17.27   16.34
 -14  11  15   19.19   18.27
 -11  -3  16   -8.32   13.23
  -4  14 -10    5.59    8.32
  -4  14  -8    1.38    7.68
  -4  14  -7   76.81   13.09
   4 -14  -6   90.72   19.60
  -4  14  -6   79.43   12.52
  -4  14  -5  137.13   13.74
  10   4  -5  149.10   23.87
   4 -14  -5  160.96   23.94
 -10  -4  -5  136.83   25.80
 -10  -4  -5  139.59   24.80
  10   4  -4  101.07   19.51
  -4  14  -4   98.31    9.99
  10   4  -3   19.30    8.35
  -4  14  -3   18.61    3.29
  10   4  -2  270.39   31.61
  -4  14  -2  168.20    9.23
  10   4  -1  154.27   23.25
  -4  14  -1  131.55   10.78
  -4  14   0   51.73    8.63
  -4  14   1  167.29   17.10
  -4  14   2  277.62   25.15
  -4  14   3   20.09    6.08
 -14  10   4   91.20   10.77
  -4  14   4  118.79   16.57
  -4  14   4  110.82   20.00
  -4  14   5  146.37   24.26
  -4  14   6   96.45   21.21
 -10  -4   6   94.61   17.26
 -14  10   6  117.41   24.23
  -4  14   7   74.34   19.95
 -10  -4   7   73.18   17.42
 -14  10   7   83.63   22.56
 -14  10   8   11.85   12.03
 -10  -4   8   -6.44    7.63
  -4  14   8    5.06    7.15
 -14  10   9   10.31   10.49
  -4  14   9   -0.86   10.63
 -10  -4   9    3.55    9.96
 -14  10  10    5.23    8.16
  -4  14  10  -14.42   12.50
 -10  -4  10   -0.50    5.71
  -4  14  11    8.87   10.82
 -14  10  11   24.02   16.12
 -10  -4  11    6.11    9.83
  -4  14  12   44.43   22.31
 -10  -4  12    8.97   10.23
 -14  10  12   13.34   13.56
 -14  10  13   39.92   19.57
 -10  -4  13    0.63    8.01
  -4  14  13   22.11   21.32
  -4  14  14   32.83   23.26
 -10  -4  14  -21.59   14.82
 -14  10  14   26.12   21.05
 -14  10  15    6.87    9.39
  -4  14  15  -11.22   14.25
 -10  -4  15  -15.48   15.70
 -10  -4  16  -21.26   15.42
  -5  14 -10    8.44    8.56
  -5  14  -8   -3.25    3.80
  -5  14  -7    9.54    4.51
  -9  -5  -6   44.49   15.45
  -5  14  -6   49.91   11.08
  -9  -5  -5   56.50   17.16
  -5  14  -5   26.77    6.95
  -9  -5  -5   55.93   16.57
  -9  -5  -4  113.95   21.72
  -5  14  -4  110.01   12.15
  -9  -5  -4  127.45   22.76
   9   5  -4  124.24   20.83
   9   5  -3   26.69    8.72
   9   5  -2  216.42   27.89
   9   5  -1   19.68    9.13
   9   5   0  277.25   31.83
  -5  14   0  259.65   19.54
  -5  14   1   18.01    4.96
  -5  14   2  189.90   20.93
  -5  14   3   27.07    7.61
  -5  14   4  115.46   15.52
  -5  14   4  116.89   19.39
 -14   9   4   96.64   11.69
  -5  14   5   39.07   13.30
  -5  14   5   31.51    8.87
  -9  -5   6   39.85   11.83
  -5  14   6   46.31   14.53
  -5  14   7    7.40    9.94
  -9  -5   7    0.95    7.34
 -14   9   7   28.77   16.87
  -9  -5   8    5.32    6.66
 -14   9   8   17.68   13.51
  -5  14   8  -11.05   13.49
  -5  14   9   45.99   19.07
 -14   9   9   57.43   18.85
  -9  -5   9   44.34   14.41
 -14   9  10   13.30   10.47
  -5  14  10    9.97   11.30
  -9  -5  10   37.03   15.15
  -5  14  11  -17.85   17.91
  -9  -5  11    1.24    6.72
 -14   9  11    4.94    8.63
  -5  14  12  -10.92    9.95
  -9  -5  12    6.80   10.38
 -14   9  12   20.05   15.47
  -9  -5  13   29.88   16.83
  -5  14  13    5.33   14.56
 -14   9  13  -10.58    8.67
  -9  -5  14   35.28   19.23
  -5  14  14   25.27   19.72
 -14   9  14   24.75   16.44
  -5  14  15   22.28   16.79
  -9  -5  15   12.04   12.59
 -14   9  15    9.12   12.42
  -9  -5  16   25.83   21.88
  -6  14 -10   -0.34    4.82
  -6  14  -7   81.82   16.20
  -8  -6  -6   75.63   18.49
  -6  14  -6   56.88   11.78
  -6  14  -5   23.46    6.43
  -8  -6  -5   26.96   12.01
  -8  -6  -5   21.07   12.41
  -8  -6  -4   29.37   12.35
  -8  -6  -4   29.28   11.88
  -6  14  -4   38.94    8.15
  -8  -6  -3   30.10    9.37
   8   6  -3   42.51   12.88
   8   6  -2   28.31   11.98
   8   6  -1   67.34   15.20
   8   6   0  591.50   45.40
  -6  14   1   78.45   13.30
   8   6   1   68.98   15.21
  -6  14   2   32.91    8.44
  -6  14   3   41.40   10.58
 -14   8   3   37.59    8.52
 -14   8   4   35.07    8.47
  -6  14   4   26.39   10.70
  -6  14   4   29.52    7.89
  -8  -6   5   19.84    7.05
  -6  14   5   19.84   11.37
  -6  14   5   28.94    7.60
  -6  14   6   82.25   19.64
  -8  -6   6   76.98   15.06
  -8  -6   7   67.94   15.18
 -14   8   7  105.85   23.11
  -6  14   7   77.61   20.11
 -14   8   8   95.53   24.14
  -8  -6   8   75.76   17.86
  -6  14   8   64.84   19.36
 -14   8   9   27.29   15.06
  -6  14   9   26.42   13.12
  -8  -6   9   51.56   16.67
  -8  -6  10    9.82    9.34
 -14   8  10    1.03    7.35
  -6  14  10    2.25    8.30
  -6  14  11   -0.34    8.77
  -8  -6  11   22.29   13.75
 -14   8  11   -8.04   12.84
  -6  14  12    2.60   10.39
  -8  -6  12    5.75    6.84
 -14   8  12  -12.11   13.90
  -6  14  13   15.07   13.75
  -8  -6  13   30.56   16.40
 -14   8  13   11.62   13.24
  -6  14  14   17.72   16.93
  -8  -6  14   27.36   17.70
 -14   8  14   13.11   15.29
  -6  14  15    3.85   10.11
  -8  -6  15    1.52    9.23
 -14   8  15   -7.92   16.58
  -8  -6  16  -24.27   18.29
  -7  14  -9   27.46   12.05
  -7  14  -7    6.87    6.26
  -7  -7  -7   14.23   10.66
  -7  14  -6   46.46   11.74
  -7  -7  -6   46.90   15.65
  -7  -7  -6   50.33   16.24
  -7  14  -5   56.69   11.37
  -7  -7  -5   72.45   17.64
  -7  -7  -5   76.53   17.95
  -7  -7  -4  124.37   22.74
  -7  -7  -4  118.22   22.13
  -7  -7  -3   18.16    9.27
   7   7  -2  806.61   52.68
   7   7  -1  115.20   20.38
   7   7   0  938.69   57.17
  -7  14   1  116.90   15.49
   7   7   1  126.47   21.01
  -7  14   2  785.06   43.78
  -7  14   3   22.32    8.18
 -14   7   3   20.46    6.38
  -7  14   4  120.58   20.12
 -14   7   4  111.39   14.40
  -7  14   5   70.06   16.98
  -7  -7   5   53.76   11.25
  -7  14   5   55.01    8.91
  -7  14   6   71.62   18.64
  -7  -7   6   48.10   11.16
  -7  14   7    6.94    9.51
 -14   7   7   15.72   12.44
  -7  -7   7   12.07    8.65
 -14   7   8   42.27   14.36
  -7  14   8   28.85   14.62
  -7  -7   8   53.76   16.06
  -7  14   9   17.21   14.19
 -14   7   9   18.83   12.66
  -7  -7   9   33.35   12.64
 -14   7  10   30.69   15.62
  -7  -7  10   24.65   12.74
  -7  14  10   35.24   16.60
 -14   7  11   12.43   10.85
  -7  -7  11   11.50   10.30
  -7  14  11   26.81   18.87
  -7  14  12   19.97   16.10
  -7  -7  12    5.83    9.85
 -14   7  12   -4.08    7.64
 -14   7  13   -2.20    8.63
  -7  14  13   17.63   11.11
  -7  -7  13   11.80   13.05
  -7  -7  14   16.39   13.97
  -7  14  14   13.99   12.82
 -14   7  14   40.75   21.16
 -14   7  15   -0.81    8.98
  -7  -7  15  -20.24   17.59
  -7  14  15    6.21    9.33
  -7  -7  16    3.37    9.30
  -8  14  -9   41.74   14.11
  -6  -8  -7    1.95    6.60
  -8  14  -6    9.18    6.00
  -6  -8  -6    6.28    9.26
  -6  -8  -6   12.81    9.07
  -8  14  -5   12.82    5.94
  -6  -8  -5    8.70    6.70
  -6  -8  -5   15.91    8.58
  -6  -8  -4  199.81   26.94
  -6  -8  -4  177.50   25.86
  -6  -8  -3   11.66    6.60
  -6  -8  -2  189.84   23.64
   6   8  -1   59.63   14.03
   6   8   0    6.29    8.61
   6   8   1   42.73   11.34
  -8  14   2  214.47   23.69
 -14   6   2  199.72   22.52
   6   8   2  213.59   28.15
  -8  14   3   23.47   10.53
 -14   6   3   14.07    6.15
  -8  14   4  171.52   24.22
  -6  -8   4  172.66   16.40
  -8  14   5    7.56    6.55
  -6  -8   5   -0.01    3.86
  -8  14   5   16.47    5.13
  -6  -8   6    3.10    4.18
  -8  14   6   -0.33    5.73
  -6  -8   7   18.24    8.24
 -14   6   7   31.68   12.33
  -8  14   7   36.22   18.78
  -8  14   8   50.87   18.47
  -6  -8   8   41.49   13.42
 -14   6   8   28.68   13.46
  -8  14   9   61.12   21.01
 -14   6   9   36.62   15.91
  -6  -8   9   54.96   15.74
 -14   6  10   21.10   13.28
  -6  -8  10   16.91   10.38
  -8  14  10   25.81   16.39
  -6  -8  11    3.73    7.93
  -8  14  11    6.29    8.56
  -6  -8  12   11.21    9.97
  -8  14  12   10.92    9.14
 -14   6  12  -10.16    9.50
  -6  -8  13    3.48    8.11
  -8  14  13   -8.95   13.54
 -14   6  13   -4.25    8.47
  -8  14  14    1.54   11.44
  -6  -8  14   -8.74    7.79
 -14   6  14   14.67   12.71
  -6  -8  15    5.57   11.66
  -8  14  15   -5.46   13.30
 -14   6  15   10.35   13.06
  -9  14  -9   -3.83    6.29
  -9  14  -8   75.81   18.00
  -5  -9  -8  100.20   21.96
  -5  -9  -7  140.43   25.56
  -5  -9  -6  215.43   30.41
  -5  -9  -6  260.67   35.49
  -9  14  -6  162.51   22.92
  -5  -9  -5   34.79   10.21
  -5  -9  -5   34.61   13.04
  -5  -9  -4    6.29    3.88
  -5  -9  -3  130.51   20.85
  -5  -9  -2  101.08   16.76
  -5  -9  -1  100.77   14.87
   5   9  -1  111.91   19.32
   5   9   0   75.25   16.42
   5   9   1  121.31   19.97
   5   9   2  105.13   19.68
 -14   5   2  109.49   17.37
 -14   5   3  128.93   17.98
  -9  14   3  140.36   20.73
  -5  -9   4    8.13    4.10
  -9  14   4    9.97    5.60
  -9  14   5   21.35    4.70
  -9  14   5   30.59   12.38
  -5  -9   5   18.90    6.18
  -5  -9   6  221.19   22.54
  -9  14   6  228.39   33.86
 -14   5   7  153.56   27.26
  -9  14   7  140.35   29.69
  -5  -9   7  122.12   19.37
 -14   5   8  107.40   25.73
  -5  -9   8   78.25   15.55
  -9  14   8   85.43   22.15
  -5  -9   9   -1.85    7.15
 -14   5   9    6.12    8.75
  -9  14   9   25.31   15.18
 -14   5  10   24.01   13.53
  -9  14  10   12.08   14.68
  -5  -9  10    6.57    8.67
  -5  -9  11   14.77   10.63
  -9  14  11   17.86   15.19
 -14   5  11    6.86    9.28
  -5  -9  12   14.34   12.67
  -9  14  12    8.95   12.30
 -14   5  12   13.01   10.73
  -5  -9  13   -4.70    7.91
  -9  14  13   15.43   16.30
 -14   5  13    9.00   11.85
  -9  14  14   -6.58   14.38
 -14   5  14   -8.36   12.14
  -5  -9  14   -9.66   13.37
  -5  -9  15   11.82   11.13
 -14   5  15   23.73   18.01
  14  -4 -11   10.35    6.21
  14  -4 -10   31.03    9.23
  14  -4  -9   29.97   10.25
  -4 -10  -8   44.12   15.76
 -10  14  -8   30.22   12.12
  -4 -10  -7   84.25   19.58
  -4 -10  -6   21.91   11.30
  -4 -10  -6   28.41   12.72
  -4 -10  -5   22.00   11.03
  -4 -10  -4   30.68   10.12
  -4 -10  -3   68.39   13.94
  -4 -10  -2   39.36    9.83
  -4 -10  -1  175.57   19.00
  -4 -10   0   29.06    7.01
   4  10   0   28.40   11.03
 -14   4   1  162.94   22.17
   4  10   1  196.97   26.30
   4  10   2   38.28   11.46
 -14   4   2   43.79   11.05
  -4 -10   3   60.64    7.36
 -14   4   3   63.03   12.55
 -10  14   3   72.94   14.98
   4  10   3   71.60   15.68
 -10  14   4   53.80   14.86
  -4 -10   4   45.26    7.57
 -10  14   5   26.99   11.33
  -4 -10   5   28.84    7.29
 -10  14   5   16.65    3.81
 -10  14   6   20.30   12.45
  -4 -10   6   21.02    7.43
  -4 -10   7   60.41   12.61
 -14   4   7   88.92   22.08
 -10  14   7   73.25   19.65
  -4 -10   8   47.02   12.42
 -14   4   8   70.63   20.40
 -10  14   8   42.20   15.49
 -14   4   9   18.29   10.14
 -10  14   9   32.39   17.26
  -4 -10   9   16.15   10.47
  -4 -10  10   39.56   15.19
 -14   4  10   60.08   20.22
 -10  14  10   43.58   19.77
  -4 -10  11   10.45    9.70
 -10  14  11    6.06   12.78
 -14   4  11    2.00   10.98
  -4 -10  12    2.75    9.80
 -10  14  12   11.54   10.55
 -14   4  12   -0.53    9.43
  -4 -10  13    9.35   10.26
 -10  14  13   26.80   17.59
 -14   4  13   20.24   12.96
 -14   4  14  -21.55   11.89
 -10  14  14   -2.92   12.28
  -4 -10  14   -1.70    8.72
 -10  14  15   -4.27   16.38
 -14   4  15    6.48   16.17
  14  -3 -11    2.36    5.84
  14  -3 -10   15.76    7.76
  14  -3  -9   58.67   14.73
  -3 -11  -9   58.36   16.73
  14  -3  -8   25.79    9.52
  -3 -11  -8    8.71    7.85
 -11  14  -8    7.36    7.38
 -11  14  -7   29.82   11.17
  14  -3  -7   29.97    9.29
  -3 -11  -7   26.10   11.51
  -3 -11  -6  194.02   27.71
  -3 -11  -6  198.35   30.35
  -3 -11  -5   60.77   16.04
  -3 -11  -4   66.80   15.35
  -3 -11  -3   82.06   15.15
  -3 -11  -2  309.02   27.62
  -3 -11  -1   55.91    9.94
  -3 -11   0  285.73   19.35
 -14   3   0  310.74   31.90
  -3 -11   1   39.47    5.86
   3  11   1   54.38   14.89
 -14   3   1   62.25   14.25
   3  11   2  331.79   33.19
 -14   3   2  317.98   30.79
   3  11   3   82.25   16.33
  -3 -11   4   42.12    5.97
 -11  14   4   56.56   14.67
 -11  14   5   28.46    4.09
  -3 -11   5   44.61    7.77
 -11  14   5   51.48   14.77
  -3 -11   6  163.58   17.56
 -11  14   6  203.55   31.67
 -11  14   7   26.81    9.55
 -14   3   7   38.90   14.98
  -3 -11   7   21.99    7.06
 -11  14   8   15.73   11.73
  -3 -11   8   10.21    7.68
 -14   3   8   34.88   15.54
  -3 -11   9   45.08   14.42
 -14   3   9   68.66   21.36
 -11  14   9   71.47   24.70
 -14   3  10    0.51    7.73
  -3 -11  10    4.64    7.72
  -3 -11  11    4.88    9.61
 -11  14  11    0.77   11.21
 -14   3  11    4.99    8.14
 -11  14  12   34.15   19.43
  -3 -11  12    8.34   12.59
 -14   3  12    6.72    8.30
  -3 -11  13   -1.68   10.02
 -11  14  13    1.22    9.28
 -14   3  13   19.95   15.58
 -11  14  14   28.03   16.80
 -14   3  14   -4.04    8.89
 -11  14  15    9.52   11.14
 -14   3  15   -7.73    8.55
  14  -2 -11   15.95    9.31
  14  -2 -10   43.51   12.35
  14  -2  -9   24.67   10.53
  -2 -12  -9   16.74   10.28
  -2 -12  -8   61.77   16.56
  14  -2  -8   52.86   14.22
  14  -2  -7    4.22    4.98
 -12  14  -7   -4.88    7.76
  -2 -12  -6   13.18    5.03
  14  -2  -6   17.40    7.10
  -2 -12  -5  108.70   21.09
  -2 -12  -4   64.22   15.64
  -2 -12  -3   43.94   11.81
  -2 -12  -2   72.99   13.86
  -2 -12  -1   17.94    5.83
 -14   2   0   28.92   11.55
  -2 -12   0   18.92    4.49
   2  12   1    8.48    5.60
 -14   2   1    7.86    5.88
 -14   2   2   80.30   16.48
   2  12   2   81.03   17.06
   2  12   3   17.34    5.98
 -12  14   5   87.27   18.86
 -12  14   6   18.66   10.51
   2  12   6   12.43    8.65
  -2 -12   6   16.68    5.30
 -12  14   7    3.05    7.46
 -14   2   7   18.76   11.59
  -2 -12   7    6.43    4.24
 -12  14   8   36.26   17.34
 -14   2   8   46.23   16.32
  -2 -12   8   24.39   10.31
   2  12   8   -8.71   15.83
 -14   2   9   27.48   15.80
   2  12   9   15.84   13.60
  -2 -12   9   11.88    6.94
 -12  14   9   17.74   15.98
 -14   2  10   54.77   19.51
   2  12  10   43.47   20.76
 -12  14  10   61.07   22.62
  -2 -12  10   42.71   13.68
 -14   2  11   -5.77   12.70
 -12  14  11   -7.77    8.20
   2  12  11   13.54   12.25
 -14   2  12   20.31   16.49
 -12  14  12   40.57   20.47
 -12  14  13   12.93   13.62
 -14   2  13    0.25    9.40
 -12  14  14   -1.50    8.44
 -14   2  14   16.78   20.00
 -14   2  15   15.99   15.56
  14  -1 -11    4.10    8.39
  14  -1 -10   23.30   11.30
  14  -1  -9   22.31    9.57
  14  -1  -8   51.33   15.22
  14  -1  -7   22.15    9.85
  -1 -13  -6   86.34   18.92
  14  -1  -6   81.03   16.31
  -1 -13  -5   83.43   19.54
  14  -1  -5   74.60   15.53
  -1 -13  -4   59.64   14.39
  -1 -13  -3  111.34   17.59
  -1 -13  -2  -15.51    9.47
 -14   1  -1  245.41   31.10
  -1 -13  -1  203.37   18.20
 -14   1   0    4.31    4.43
  -1 -13   0    3.20    2.51
 -14   1   1  252.49   30.52
 -14   1   2   16.39    9.44
   1  13   2   12.56    9.23
   1  13   3  124.06   21.00
   1  13   4   52.26   13.32
   1  13   4   64.87   14.71
 -13  14   5   66.51   16.97
   1  13   5   76.25   19.52
   1  13   6   61.26   17.97
 -13  14   6   99.36   21.89
 -13  14   7   34.05   13.74
 -14   1   7   62.72   18.92
   1  13   8   28.36   12.42
 -13  14   8   58.17   19.57
 -14   1   8   59.67   18.83
 -13  14   9   26.76   14.38
 -14   1   9   37.73   14.61
   1  13   9   18.37    9.27
 -14   1  10    7.98    6.51
   1  13  10   23.46   17.22
 -13  14  10   21.04   16.65
   1  13  11   10.48   16.35
 -14   1  11  -19.01   16.31
 -13  14  11   28.80   18.99
   1  13  12  -12.61   13.44
 -13  14  12  -14.27   13.02
 -14   1  12   18.80   13.16
 -13  14  13    9.30   14.17
   1  13  13   -3.45   11.64
 -14   1  13    4.26   13.52
 -13  14  14   14.92   14.85
 -14   1  14   18.24   19.08
 -14   1  15    9.74   13.61
  14   0 -12    9.12   10.49
  14   0 -11   -3.70    6.30
  14   0 -10   -0.75    7.61
  14   0  -9    2.36    5.64
  14   0  -8   32.05   12.07
  14   0  -7  103.59   19.83
   0 -14  -6   15.44    7.13
  14   0  -6   31.80   11.80
   0 -14  -5   -6.03    8.55
  14   0  -5    0.42    5.72
   0 -14  -4   68.36   15.26
   0 -14  -3  172.16   22.24
   0 -14  -2   34.50    9.46
   0 -14  -1   49.04    8.37
 -14   0  -1   55.33   15.48
 -14   0   0   12.54    4.84
 -14   0   1   74.73   16.59
   0  14   2   34.84   12.61
   0  14   3  177.79   25.74
   0  14   3  158.62   22.33
   0  14   4   67.45   15.19
   0  14   4   85.89   17.38
   0  14   5    8.66    9.04
 -14  14   5    5.35    7.26
   0  14   6   11.94    8.37
 -14  14   6   45.03   16.53
   0  14   7   81.39   22.15
 -14  14   7   96.25   25.43
 -14   0   7   97.90   21.58
   0  14   8   35.25   15.65
 -14  14   8   20.83   12.70
 -14   0   8   44.67   15.78
   0  14   9  -14.31    9.45
 -14  14   9  -18.84   13.96
 -14   0   9  -13.03   12.45
 -14   0  10   -5.93   10.28
   0  14  10   13.70   10.72
 -14  14  10    1.20    8.98
   0  14  11    8.63    7.98
 -14  14  11   25.71   16.97
 -14   0  11   -4.96    9.41
   0  14  12   -3.42   12.62
 -14  14  12   12.48   13.71
 -14   0  12    9.37    9.92
 -14  14  13   18.47   19.25
   0  14  13   -4.01    9.36
 -14   0  13    0.61    9.59
 -14  14  14   28.59   18.50
 -14   0  14   18.42   16.74
   0  14  14   -0.60   10.62
 -14   0  15  -22.24   17.38
 -14   0  16   20.19   20.48
  14   1 -12   21.35   11.49
  14   1 -11   -5.26    9.50
  14   1 -10   17.70   11.53
  14   1  -9   -0.46    7.20
  14   1  -8    9.11    7.01
  14   1  -7   38.87   14.32
   1 -15  -6   11.78    6.91
  14   1  -6   24.64    9.06
  14   1  -5   -2.94    7.02
   1 -15  -5   -1.68    4.87
   1 -15  -4    8.12    4.97
  14   1  -4   13.34    8.77
   1 -15  -3    5.61    3.54
   1 -15  -2  131.07   16.62
 -14  -1  -1  158.33   26.37
 -14  -1   0   24.99   11.10
 -14  -1   1  171.28   26.66
  -1  15   2  169.21   24.42
  -1  15   2  135.10   18.24
  -1  15   3   19.57    8.18
  -1  15   3   -5.25    7.80
  -1  15   4   15.53    8.75
  -1  15   4   14.93    8.94
  -1  15   5    3.50    4.98
 -15  14   5   -1.40    1.51
  -1  15   6    4.52   10.16
 -15  14   6   46.36   16.48
  -1  15   7   33.86   14.06
 -15  14   7   43.26   17.94
 -14  -1   7   58.45   15.83
  -1  15   8    6.70    8.52
 -15  14   8   -5.14    8.89
 -14  -1   8    5.44   11.86
  -1  15   9  -24.51   15.51
 -15  14   9  -11.24   13.66
 -14  -1   9  -16.88   12.48
 -14  -1  10    0.72    7.22
  -1  15  10  -14.72   12.09
  -1  15  11    9.08    9.26
 -15  14  11   13.35    8.22
 -14  -1  11    7.30   13.67
  -1  15  12  -17.87   16.67
 -14  -1  12   10.48   14.00
 -15  14  12   17.56   16.47
  -1  15  13    2.18   10.80
 -15  14  13   10.94   13.78
 -14  -1  13   27.26   18.99
 -14  -1  14    0.47    9.08
 -15  14  14   18.80   16.81
  -1  15  14   23.93   15.50
 -14  -1  15  -18.08   11.01
 -14  -1  16   -2.45   11.17
  13   2 -12   27.93   14.20
  13   2 -11   22.41   10.72
  13   2 -10   16.37   11.18
  13   2  -9   25.83   10.23
  13   2  -8   61.93   16.29
  13   2  -7   44.91   15.80
   2 -15  -6    8.36    7.17
  13   2  -6   34.46   13.63
   2 -15  -5   29.48   12.02
  13   2  -5   25.57    9.56
  13   2  -4   92.55   19.48
   2 -15  -4   90.38   17.06
  13   2  -3    3.52    5.88
   2 -15  -3    9.86    5.71
 -13  -2   0  129.96   23.07
  -2  15   1   34.94    7.95
 -13  -2   1   47.59   13.97
  -2  15   2  366.44   29.68
  -2  15   3    3.50    5.59
  -2  15   3    7.26    4.00
  -2  15   4   93.92   18.19
  -2  15   4  108.32   18.10
  -2  15   5   10.86    8.21
 -15  13   5   13.17    3.00
  -2  15   6   25.66   13.34
 -15  13   6   48.55   18.23
 -15  13   7   41.19   17.07
 -13  -2   7   22.19   11.37
  -2  15   7   25.68   12.04
  -2  15   8   31.27   14.25
 -15  13   8   83.91   23.92
 -13  -2   8   65.88   18.21
 -13  -2   9   21.54    9.61
 -15  13   9   32.22   15.13
  -2  15   9   -6.19   10.34
 -15  13  10   35.33   20.40
  -2  15  10   10.94    8.69
 -13  -2  10   33.75   15.10
  -2  15  11   17.40   13.82
 -15  13  11   24.56   15.05
 -13  -2  11   40.05   16.79
  -2  15  12   -0.50    9.04
 -13  -2  12   17.51   13.60
 -15  13  12   26.09   19.84
  -2  15  13  -16.12   13.85
 -13  -2  13    7.37   10.21
 -15  13  13   11.48   13.60
  -2  15  14    7.98   10.63
 -13  -2  14   14.51   13.92
 -15  13  14    0.19   10.96
 -13  -2  15   11.99   13.05
 -13  -2  16  -13.67   16.48
  -3  15  -9    7.46    4.88
  -3  15  -8   64.21   12.80
  12   3  -8   56.29   16.13
  12   3  -7  128.84   24.21
  -3  15  -7   93.03   13.52
  -3  15  -6   12.83    4.65
  12   3  -6   21.15   11.83
   3 -15  -6   17.30   10.29
  12   3  -5   17.32    9.94
   3 -15  -5   11.84    5.90
   3 -15  -4    7.75    5.21
  12   3  -4    6.92    6.21
  12   3  -3  115.93   20.43
  12   3  -2   27.58   11.29
  -3  15   0  106.89   11.39
 -12  -3   0  128.41   21.70
  -3  15   1   16.86    5.92
  -3  15   2   11.51    6.38
  -3  15   3  115.61   18.49
  -3  15   3  123.08   19.10
  -3  15   4   18.32   10.01
  -3  15   4   26.84    9.65
  -3  15   5   12.82    4.90
  -3  15   5   14.72    7.34
  -3  15   6    8.86    8.15
 -15  12   6   46.27   18.13
  -3  15   7   98.06   24.14
 -12  -3   7  103.24   21.47
 -15  12   7  130.42   27.56
  -3  15   8   84.20   22.49
 -12  -3   8   63.05   15.61
 -15  12   8   65.10   19.51
 -12  -3   9   15.68    7.45
 -15  12   9   13.69   12.27
  -3  15   9   27.60   16.36
 -15  12  10   25.12   15.03
  -3  15  10    8.51    7.55
 -12  -3  10    5.86    7.26
  -3  15  11    3.37   11.65
 -15  12  11  -24.94   16.89
 -12  -3  11    5.33    9.34
  -3  15  12   10.21   13.12
 -12  -3  12   -2.75    6.60
 -15  12  12   13.22   13.90
  -3  15  13  -22.88   19.84
 -12  -3  13   -9.69   12.34
 -15  12  13   10.77   16.06
  -3  15  14   17.21   16.50
 -12  -3  14   27.06   18.37
 -15  12  14   15.45   21.29
 -12  -3  15    0.48    9.55
 -12  -3  16  -12.57   14.12
  -4  15 -10   16.38    8.65
  -4  15  -8   28.56    7.91
  -4  15  -7  144.32   17.40
  -4  15  -6   83.52   12.01
  11   4  -6  116.68   22.83
   4 -15  -6  104.24   22.16
  11   4  -5   11.61    8.75
  -4  15  -5    0.61    2.54
  11   4  -4  133.07   23.93
  -4  15  -4   74.27    7.04
  11   4  -3   72.04   17.23
  11   4  -2   96.04   18.81
  11   4  -1   51.08   14.84
  -4  15  -1   36.13    5.67
  -4  15   0   24.74    6.87
  -4  15   1   46.32   10.23
  -4  15   2   88.51   14.11
  -4  15   3   76.85   15.49
  -4  15   4  144.84   23.13
  -4  15   4  131.05   18.74
 -15  11   4   99.64   11.97
  -4  15   5    2.49    4.40
  -4  15   5    0.76    5.24
  -4  15   6   96.89   21.94
 -11  -4   6   99.15   18.50
  -4  15   7  178.26   30.57
 -11  -4   7  209.69   28.25
 -15  11   7  217.84   33.95
 -11  -4   8   30.56   12.44
  -4  15   8   27.97   13.71
 -15  11   8   48.96   18.95
 -11  -4   9   10.40    9.27
 -15  11   9    2.04    8.29
  -4  15   9    8.53    9.54
  -4  15  10  -11.75    9.93
 -15  11  10    3.39    9.53
 -11  -4  11   18.73   11.12
  -4  15  11   24.54   13.78
 -15  11  11   18.56    9.36
 -11  -4  12    6.64   11.84
 -15  11  12   10.09   13.42
  -4  15  12   14.96   17.58
  -4  15  13   30.23   18.70
 -11  -4  13    7.30    9.18
 -15  11  13   35.99   21.49
  -4  15  14   -6.36   12.48
 -11  -4  14   -8.50   10.51
 -15  11  14   14.86   14.54
 -11  -4  15  -17.25   16.90
 -11  -4  16   -5.76   11.94
  -5  15 -10   -9.12    8.51
  -5  15  -8   26.94    9.01
  -5  15  -7   35.93   10.67
  -5  15  -6   25.70    8.71
 -10  -5  -5   70.98   18.59
  10   5  -5   84.08   18.99
  -5  15  -5   76.04   10.82
  -5  15  -4   35.93    6.44
 -10  -5  -4   40.90   12.21
  10   5  -4   41.11   14.93
 -10  -5  -4   48.98   14.01
  10   5  -3   52.25   14.11
  -5  15  -3   29.17    5.23
  10   5  -2   74.91   17.96
  10   5  -1  104.10   19.93
  -5  15  -1  101.82   10.47
  -5  15   0  240.44   18.74
  10   5   0  220.82   28.14
  -5  15   1   92.29   12.62
  -5  15   2   66.57   12.69
  -5  15   3   37.07   10.66
 -15  10   4   36.71    8.21
  -5  15   4   39.50   10.94
  -5  15   4   41.09   12.04
  -5  15   5   58.19   11.80
  -5  15   5   77.60   18.56
  -5  15   6   22.76   12.80
 -10  -5   6   25.81    9.71
 -10  -5   7   29.49   11.12
  -5  15   7    9.17    9.12
 -15  10   7   44.58   17.31
 -10  -5   8   34.72   11.50
  -5  15   8   16.51    8.93
 -15  10   8   35.89   16.90
 -15  10   9   -2.38    8.50
  -5  15   9    5.33   10.50
 -10  -5   9    3.72    7.28
 -15  10  10   20.13   11.71
  -5  15  10    2.07   11.00
 -10  -5  10    3.05    7.39
 -15  10  11   28.04   13.87
  -5  15  11   48.09   21.47
 -10  -5  11   39.67   16.87
  -5  15  12    9.62    9.09
 -10  -5  12   -3.44   10.24
 -15  10  12  -23.28   12.79
  -5  15  13  -10.55   14.95
 -10  -5  13    2.70    9.50
 -15  10  13   15.37   14.35
  -5  15  14   -2.77   11.34
 -10  -5  14   22.36   16.37
 -15  10  14   12.81   16.61
  -5  15  15   17.87   16.90
 -10  -5  15    2.87    7.98
 -15  10  15  -13.54   11.00
 -10  -5  16  -14.13   15.11
  -6  15 -10   22.89   11.43
  -6  15  -8    3.30    4.96
  -6  15  -7  104.81   17.28
  -6  15  -6    3.91    3.91
  -9  -6  -5   26.30   10.41
  -6  15  -5   13.99    5.43
  -9  -6  -5   12.20    6.89
  -9  -6  -4  135.28   24.26
  -9  -6  -4  132.00   24.17
   9   6  -4  130.03   22.89
  -6  15  -4  129.14   14.06
   9   6  -3   42.44   13.05
   9   6  -2  106.30   21.20
   9   6  -1  183.49   27.02
   9   6   0  474.60   42.12
  -6  15   0  473.55   27.36
  -6  15   1  161.79   18.05
  -6  15   2   96.62   15.30
  -6  15   3   14.15    5.23
  -6  15   4  167.40   24.33
 -15   9   4  121.58   14.62
  -6  15   4  130.56   16.03
  -6  15   5   20.57    6.62
  -6  15   5   16.74    8.84
  -9  -6   6    5.64    5.57
  -6  15   6   -2.61    7.68
  -9  -6   7   90.54   16.86
  -6  15   7  110.48   24.09
 -15   9   7  125.74   25.93
  -6  15   8   -5.68   10.54
  -9  -6   8    3.24    7.24
 -15   9   9   -7.06   10.75
  -6  15   9   12.77   13.79
  -9  -6   9   26.81   13.32
 -15   9  10   16.74   13.77
  -6  15  10   26.81   17.93
  -9  -6  10   22.84   12.08
 -15   9  11    8.62   10.35
  -6  15  11  -15.00    9.92
  -9  -6  11    9.45    9.18
  -6  15  12   11.82   10.44
  -9  -6  12   13.01   10.30
 -15   9  12    2.09    9.89
  -6  15  13   11.25   14.13
  -9  -6  13   -2.02    7.37
 -15   9  13    0.46   12.01
  -6  15  14    8.49   10.26
 -15   9  14    0.77   10.18
  -9  -6  14  -13.28   11.66
  -6  15  15   19.58   24.04
  -9  -6  15   -0.50   10.63
 -15   9  15   20.14   17.26
  -7  15  -9   -0.31    4.66
  -7  15  -7   20.58    8.79
  -7  15  -6   30.10    9.21
  -8  -7  -5   52.29   14.83
  -7  15  -5   40.30    9.64
  -8  -7  -5   38.41   13.66
  -8  -7  -4   12.42    9.39
  -8  -7  -4   -7.36    9.29
  -8  -7  -3   19.68    9.00
   8   7  -3   30.72   12.54
   8   7  -2    6.48    7.79
   8   7  -1  314.07   34.34
   8   7   0   46.06   16.31
  -7  15   1  324.85   26.00
   8   7   1  310.41   34.44
  -7  15   2    8.55    8.02
  -7  15   3   18.61    8.10
 -15   8   3   25.87    7.50
 -15   8   4    7.74    5.92
  -7  15   4  -10.66   11.01
  -7  15   5   44.14    9.06
  -8  -7   5   47.14   10.81
  -7  15   5   37.66   12.36
  -8  -7   6   35.91   10.67
  -7  15   6   39.46   15.24
  -8  -7   7   18.23    8.10
  -7  15   7   22.05   12.81
 -15   8   7   34.51   14.78
 -15   8   8   57.18   19.80
  -7  15   8   46.59   18.97
  -8  -7   8   47.09   15.36
  -7  15   9   -6.11    8.83
  -8  -7   9   -2.18    6.85
 -15   8   9   -6.26    7.13
  -7  15  10    0.79    8.22
 -15   8  10   14.81   12.28
  -8  -7  10    9.84    8.77
 -15   8  11   -0.36    7.34
  -7  15  11    6.87   10.04
  -8  -7  11    3.83    7.51
  -7  15  12    0.13   13.22
  -8  -7  12   -3.11    6.91
 -15   8  12   -8.56    9.41
  -7  15  13   -2.29   11.11
  -8  -7  13    7.84    8.23
 -15   8  13   19.15   15.79
  -8  -7  14   -9.92    8.45
  -7  15  14   11.36   14.16
 -15   8  14   13.81    9.58
  -7  15  15   -0.55   15.21
  -8  -7  15   -2.29    9.27
 -15   8  15   31.45   17.45
  -8  15  -9    3.39    8.15
  -8  15  -7   33.99   12.83
  -7  -8  -6    3.26    6.97
  -8  15  -6   14.82    7.21
  -7  -8  -5   19.43   11.04
  -8  15  -5   12.38    6.33
  -7  -8  -5   11.68    4.77
  -7  -8  -4   10.09    7.39
  -7  -8  -4    7.72    8.04
  -7  -8  -3   38.42   12.87
  -7  -8  -3   23.56    8.58
   7   8  -2   94.34   17.98
  -7  -8  -2   68.89   14.47
   7   8  -1    9.48    7.71
   7   8   0  238.42   29.76
   7   8   1   18.91   11.35
  -8  15   2  101.69   17.37
  -8  15   3   35.24   11.16
 -15   7   3   37.11    9.92
  -8  15   4    0.32    6.13
 -15   7   4    4.02    5.54
  -8  15   5   22.82    9.27
  -7  -8   5   18.42    7.36
  -8  15   5   15.33    5.73
  -7  -8   6   17.89    6.55
  -8  15   6   14.74   10.91
  -8  15   7  183.20   31.19
  -7  -8   7  152.06   22.00
 -15   7   7  155.17   28.44
 -15   7   8   66.11   21.13
  -7  -8   8   65.92   16.86
  -8  15   8   60.87   20.44
  -7  -8   9   13.54    8.86
  -8  15   9   15.87   12.07
 -15   7   9    6.64    8.74
  -7  -8  10   20.79   12.46
 -15   7  10   -4.58    7.24
  -8  15  10   21.45   15.80
  -7  -8  11    0.95    9.08
  -8  15  11    4.63   13.15
 -15   7  11    0.27    9.63
  -7  -8  12    6.88    6.48
  -8  15  12   -6.31    8.69
 -15   7  12  -16.96   14.11
  -7  -8  13   20.19   14.48
 -15   7  13   23.59   15.71
  -8  15  13    4.31   11.14
  -7  -8  14    6.90   10.51
  -8  15  14  -22.06   16.45
 -15   7  14    3.51    8.89
  -7  -8  15  -11.06   13.41
 -15   7  15   24.04   17.03
  -8  15  15   -5.21   17.69
  -9  15  -9   13.19   10.36
  -9  15  -6   36.89   11.73
  -6  -9  -6   31.69   14.63
  -6  -9  -5   28.73   10.53
  -6  -9  -5   39.88   13.88
  -6  -9  -4  136.62   23.51
  -6  -9  -4  120.75   21.84
  -6  -9  -3   26.21    7.85
  -6  -9  -2   39.28   10.64
   6   9  -1   -3.82    9.47
  -6  -9  -1   13.89    6.05
   6   9   0   52.52   14.39
   6   9   1    5.34    5.56
   6   9   2   50.91   15.46
 -15   6   2   34.70   10.36
  -9  15   2   43.33   12.52
 -15   6   3   35.26    9.31
  -9  15   3   40.75   12.52
  -9  15   4  134.77   21.80
  -6  -9   4  114.91   13.44
  -6  -9   5   26.64    5.81
  -9  15   5   33.17   11.48
  -9  15   5   33.15    6.75
  -9  15   6   32.44   13.30
  -6  -9   6   14.31    5.43
 -15   6   7  204.46   32.45
  -6  -9   7  199.85   24.38
  -9  15   7  252.66   36.96
  -6  -9   8   45.74   12.39
 -15   6   8   62.87   19.55
  -9  15   8   68.59   21.47
 -15   6   9   23.46   13.20
  -6  -9   9    3.38    6.21
  -9  15   9   32.55   16.40
 -15   6  10   19.22   11.23
  -6  -9  10   16.66    9.69
  -9  15  10   30.51   17.97
 -15   6  11   24.47   15.44
  -9  15  11   17.01   18.63
  -6  -9  11   24.18   12.54
  -6  -9  12   -4.87    8.81
  -9  15  12   16.45   15.14
 -15   6  12   10.80   13.18
  -6  -9  13   -4.44    7.24
  -9  15  13  -13.28   16.11
 -15   6  13   13.30   13.64
  -6  -9  14  -19.38   16.09
  -9  15  14   10.98    8.90
 -15   6  14    1.90   11.76
 -15   6  15    5.61   12.34
 -10  15  -8  107.50   20.65
  -5 -10  -7  304.44   37.54
  -5 -10  -6   19.99   13.71
  -5 -10  -6   29.44   12.36
  -5 -10  -5   -5.21    6.46
  -5 -10  -5   -6.41    5.58
  -5 -10  -4   51.60   13.95
  -5 -10  -3  210.41   25.62
  -5 -10  -2   75.53   14.85
  -5 -10  -1    3.17    3.35
   5  10  -1  -10.12    8.01
   5  10   0  167.18   24.60
  -5 -10   0  151.63   16.92
   5  10   1    1.29    5.89
 -15   5   1    3.35    4.87
   5  10   2  102.00   20.53
 -15   5   2   82.95   15.82
 -15   5   3  210.58   23.48
 -10  15   3  226.43   26.58
  -5 -10   4   36.54    6.97
 -10  15   4   55.79   14.62
 -10  15   5   10.63    8.06
 -10  15   5    0.33    2.13
  -5 -10   5    5.79    3.96
  -5 -10   6   22.21    7.40
 -10  15   6   34.33   14.96
  -5 -10   7  278.48   27.67
 -15   5   7  260.83   36.04
 -10  15   7  297.98   40.62
  -5 -10   8  119.04   20.50
 -15   5   8  142.42   28.73
 -10  15   8   98.48   25.57
  -5 -10   9    9.56    7.77
 -15   5   9   10.11   10.49
 -10  15   9    5.05   11.56
 -15   5  10   27.56   15.45
 -10  15  10   25.17   13.84
  -5 -10  10    0.70    6.00
 -15   5  11   20.90    9.68
  -5 -10  11   17.78   11.49
 -10  15  11   30.47   18.89
  -5 -10  12    5.82    7.38
 -10  15  12  -10.48    8.99
 -15   5  12  -15.83   11.77
  -5 -10  13   14.97    8.31
 -10  15  13    8.97   11.51
 -15   5  13    9.65   12.59
  -5 -10  14   14.44   14.97
 -10  15  14    5.41   10.70
 -15   5  14    2.00   13.08
 -15   5  15   16.79   13.09
  -4 -11  -8   31.20   12.85
 -11  15  -8   41.60   13.06
 -11  15  -7  102.52   20.67
  -4 -11  -7  110.96   21.95
  -4 -11  -6   83.06   18.75
  -4 -11  -6   69.19   19.34
  -4 -11  -5   93.79   20.24
  -4 -11  -4   49.05   13.29
  -4 -11  -3  153.98   21.94
  -4 -11  -2   20.55    7.58
  -4 -11  -1   35.88    8.90
   4  11   0   44.55   13.91
  -4 -11   0   30.65    7.39
 -15   4   1   32.23   10.41
  -4 -11   1   28.50    6.25
   4  11   1   38.36   11.01
 -15   4   2   30.73   10.60
   4  11   2   20.06    9.74
 -15   4   3  156.51   20.94
   4  11   3  156.65   23.33
  -4 -11   3  101.92    8.66
  -4 -11   4   41.49    6.26
 -11  15   4   55.61   14.98
 -11  15   5   43.15    6.14
  -4 -11   5   53.41    8.96
 -11  15   5   54.13   16.64
 -11  15   6   76.24   19.97
  -4 -11   6   68.11   11.03
 -11  15   7  106.12   24.51
  -4 -11   7   84.39   14.52
 -15   4   7  116.28   24.36
  -4 -11   8   44.22   11.96
 -15   4   8   45.03   17.74
 -11  15   8    8.36    8.31
 -15   4   9  118.44   28.16
  -4 -11   9   90.15   19.02
 -11  15   9   94.97   26.09
  -4 -11  10   46.62   13.21
 -15   4  10   10.03   12.17
 -11  15  10   60.14   22.79
 -15   4  11    7.69    7.40
  -4 -11  11   29.29   14.84
 -11  15  11   49.56   20.36
  -4 -11  12    5.60    9.29
 -11  15  12   13.18   14.56
 -15   4  12   -6.26   11.27
 -11  15  13    0.89    9.09
  -4 -11  13    4.07    7.74
 -15   4  13   21.82   19.70
 -11  15  14    8.97   11.09
 -15   4  14    8.69   10.98
 -15   4  15   -0.35    8.44
  15  -3 -11    8.61    6.40
  15  -3 -10    2.09    4.10
  15  -3  -9   89.21   17.54
  -3 -12  -8   50.77   16.22
 -12  15  -7   24.00   10.89
  -3 -12  -6   31.91   14.35
  -3 -12  -5  133.39   23.46
  -3 -12  -4    7.64    6.76
  -3 -12  -3    8.67    5.47
  -3 -12  -2   24.71    8.58
  -3 -12  -1   15.46    5.54
 -15   3   0    5.41    4.98
  -3 -12   0    2.30    2.60
   3  12   1   12.41    6.01
 -15   3   1   25.56    9.51
  -3 -12   1   17.38    3.84
   3  12   2    7.54    4.92
 -15   3   2   18.05    8.08
   3  12   3   -6.78    8.18
 -12  15   4   21.18   11.32
 -12  15   5  124.31   23.19
  -3 -12   5   92.67   10.20
  -3 -12   6   36.83    8.75
 -12  15   6   34.62   14.13
 -12  15   7   32.49   12.21
  -3 -12   7   43.29   10.61
  -3 -12   8   41.63   12.21
 -15   3   8   68.44   19.57
 -12  15   8   47.53   17.71
  -3 -12   9   49.39   15.43
 -15   3   9   78.26   22.51
 -12  15   9   92.96   27.12
 -15   3  10   -6.42   10.93
  -3 -12  10   16.06    9.65
 -12  15  10   28.72   19.08
 -15   3  11  -10.74   11.09
 -12  15  11   12.93   12.81
  -3 -12  11   10.62    7.85
 -12  15  12   11.21   10.62
 -15   3  12  -10.41   13.11
 -12  15  13  -15.17   13.65
 -15   3  13   28.42   18.88
 -12  15  14   39.41   25.39
 -15   3  14    1.96   11.55
 -15   3  15   -2.10   11.94
  15  -2 -11    5.23    8.10
  15  -2 -10   23.31    8.75
  15  -2  -9   10.11    8.23
  15  -2  -8   24.10    9.47
  15  -2  -7  100.23   18.36
 -13  15  -7  105.89   23.25
  -2 -13  -6   44.00   12.56
  -2 -13  -5   39.34   13.46
  -2 -13  -4   18.52    8.29
  -2 -13  -3   -5.35    6.44
  -2 -13  -2   31.85    8.69
 -15   2  -1   42.85   13.93
  -2 -13  -1   12.02    3.11
 -15   2   0    1.73    7.57
  -2 -13   0    3.23    2.62
 -15   2   1   37.79   12.57
   2  13   1   34.55   12.82
 -15   2   2   45.13   12.99
   2  13   2   38.81   13.04
   2  13   3   -0.73    5.67
 -13  15   5   17.10    6.82
 -13  15   6   88.33   20.68
 -13  15   7  134.10   28.37
   2  13   7   87.79   21.94
 -13  15   8    4.72    8.32
 -15   2   8   24.45   12.57
   2  13   8   -0.99    8.95
 -13  15   9   -1.43   10.62
 -15   2   9   30.53   12.17
   2  13   9   15.31   11.99
 -15   2  10   22.87   14.42
   2  13  10    1.07    9.15
 -15   2  11  -27.57   16.66
 -13  15  11    9.98   13.51
 -13  15  12   11.81   13.26
 -15   2  12   -0.89   10.41
 -13  15  13    6.97   13.28
 -15   2  13   15.81   13.88
 -15   2  14    3.74    9.07
 -13  15  14   14.58   17.52
 -15   2  15  -12.32   17.05
  15  -1 -11   22.25    9.93
  15  -1 -10   36.11   12.41
  15  -1  -9    2.29    7.58
  15  -1  -8   38.28   14.53
  15  -1  -7    4.76    5.16
  -1 -14  -6  145.81   25.71
  15  -1  -6  144.59   22.44
  -1 -14  -5    7.78    5.50
  -1 -14  -4   43.80   11.81
  -1 -14  -3   59.22   13.09
  -1 -14  -2   37.87    8.20
 -15   1  -2   73.00   18.11
  -1 -14  -1   48.50    9.03
 -15   1  -1   73.47   18.11
 -15   1   0   10.94    7.35
 -15   1   1   75.30   17.42
   1  14   2   77.85   17.41
 -15   1   2   77.51   17.33
   1  14   3   68.44   16.39
   1  14   4   52.53   15.56
   1  14   5   15.80    7.00
 -14  15   5   10.28    6.82
   1  14   6  146.76   26.16
 -14  15   6  165.72   29.52
 -14  15   7   27.04   16.92
   1  14   7    3.69    6.57
   1  14   8   22.55   13.67
 -14  15   8   25.42   14.44
 -15   1   8   26.76   15.36
   1  14   9   -6.49    8.82
 -14  15   9   -2.99    7.90
 -15   1   9   -7.16    9.22
   1  14  10   27.49   18.76
 -14  15  10   22.80   15.71
 -15   1  10   35.64   17.54
 -15   1  11    8.34    9.00
   1  14  11   10.15    8.68
 -14  15  11   32.39   19.45
 -14  15  12    6.36   12.62
 -15   1  12   18.92   12.25
   1  14  12   12.18   14.35
 -14  15  13   15.25   15.53
 -15   1  13   13.80   15.23
 -14  15  14   11.30    9.05
 -15   1  14   19.40   11.98
 -15   1  15   -2.77    9.29
  15   0 -11    9.23    8.50
  15   0 -10    6.09    8.55
  15   0  -9    3.45    6.21
  15   0  -8   39.91   14.52
  15   0  -7   26.63   10.75
  15   0  -6    3.36    5.17
   0 -15  -5   26.91   11.29
  15   0  -5    0.68    8.49
   0 -15  -4   82.29   17.04
   0 -15  -3   74.44   14.79
   0 -15  -2   94.22   14.33
 -15   0  -1   82.00   20.48
 -15   0   0   30.05   12.93
 -15   0   1   83.45   17.87
   0  15   2  136.23   22.95
   0  15   3   94.51   19.20
   0  15   3   90.48   16.57
   0  15   4   90.67   18.49
   0  15   4   73.05   17.26
   0  15   5   10.67    7.60
   0  15   6   -0.25    8.44
 -15  15   6    5.41    9.74
 -15  15   7   34.10   13.52
   0  15   7   11.79    9.85
   0  15   8   54.04   18.37
 -15  15   8   27.60   13.52
 -15   0   8   59.28   17.84
   0  15   9   14.50    9.00
 -15  15   9    7.56    9.35
 -15   0   9    5.72    6.70
 -15  15  10    5.40    9.51
   0  15  10   20.99   14.88
 -15   0  10    9.38   11.64
 -15   0  11    0.65    9.56
 -15  15  11   20.40   15.97
   0  15  11   19.03   14.00
   0  15  12   23.36   17.01
 -15  15  12    6.68   11.74
 -15   0  12   29.57   15.57
 -15  15  13   41.57   20.70
 -15   0  13   33.77   16.85
   0  15  13   -8.25   15.70
 -15  15  14   11.00    8.60
 -15   0  14   12.47   17.51
 -15   0  15    1.25    9.92
  15   1 -11  -12.04   11.22
  15   1 -10   22.09   11.62
  15   1  -9   -6.76    6.12
  15   1  -8   17.39   10.62
  15   1  -7   24.95   10.07
  15   1  -6   58.97   15.34
  15   1  -5   15.29    6.20
   1 -16  -5   34.28   12.91
   1 -16  -4   29.34   10.24
   1 -16  -3   -1.82    3.88
 -15  -1   1  396.19   41.10
  -1  16   2   59.16   16.20
  -1  16   2   50.32   11.29
  -1  16   3    8.38    7.00
  -1  16   3    9.79    4.89
  -1  16   4   21.08   10.49
  -1  16   4   24.41    9.51
  -1  16   5   24.92   11.64
  -1  16   6   59.43   17.29
 -16  15   6   52.85   15.34
  -1  16   7   19.31   12.29
 -16  15   7   15.72   12.11
 -15  -1   7   32.98   13.50
  -1  16   8    6.65   10.54
 -16  15   8   15.39    9.87
 -15  -1   8   36.16   14.84
  -1  16   9   -2.79   12.36
 -16  15   9   -9.27    8.85
 -15  -1   9   11.35    8.81
 -16  15  10   35.71   19.10
  -1  16  10   18.56   11.55
 -15  -1  10   28.40   16.06
  -1  16  11   -9.78   11.56
 -15  -1  11  -23.56   13.53
 -16  15  11   -5.01   10.81
  -1  16  12   14.72   15.57
 -15  -1  12   12.53   14.98
 -16  15  12   10.32   15.21
  -1  16  13   -5.86   12.85
 -15  -1  13   21.95   12.21
 -16  15  13   15.18   16.65
 -15  -1  14   13.87   12.13
 -16  15  14   20.76   20.43
  -1  16  14   12.21   17.59
 -15  -1  15    9.06    8.25
  14   2 -12   29.94   15.12
  14   2 -11   11.28    9.60
  14   2 -10    6.41    9.92
  14   2  -9  -15.61    9.50
  14   2  -8   26.04   12.72
  14   2  -7   35.64   13.35
  14   2  -6   15.87    9.04
  14   2  -5  -10.75    9.34
   2 -16  -5   13.47    8.61
  14   2  -4    5.96    6.30
   2 -16  -4    9.94    6.90
 -14  -2   0  101.85   21.53
 -14  -2   1   19.23    9.53
  -2  16   1   10.88    5.08
  -2  16   2   18.58    7.30
  -2  16   3   35.19    9.68
  -2  16   3   44.06   11.07
  -2  16   4   -3.49    7.67
  -2  16   4   15.12    7.70
  -2  16   5    5.77    5.25
 -16  14   5    3.70    2.30
  -2  16   5    6.71    4.31
  -2  16   6   10.61    9.73
 -16  14   6   17.31   10.82
  -2  16   7   10.02    9.13
 -16  14   7   31.59   14.68
 -14  -2   7   34.74   12.92
  -2  16   8    9.70    9.33
 -16  14   8   17.70   14.94
 -14  -2   8   26.02   12.83
  -2  16   9  -27.78   16.07
 -14  -2   9   -2.65    9.25
 -16  14   9   -0.10    9.32
 -14  -2  10    0.99    9.21
  -2  16  10    2.33    7.69
  -2  16  11   -9.84   14.57
 -14  -2  11   -7.12    8.87
 -16  14  11    7.96   12.61
  -2  16  12   12.45   14.22
 -14  -2  12   -1.11    7.15
 -16  14  12   23.07   19.45
  -2  16  13   41.03   25.36
 -14  -2  13   33.12   17.51
 -16  14  13   21.29   21.24
  -2  16  14   10.53   14.73
 -14  -2  14    0.19   10.44
 -16  14  14   17.33   17.06
 -14  -2  15  -12.85   16.16
  13   3 -12   22.61   13.72
  13   3 -11  -10.16    7.81
  13   3 -10   46.02   16.36
  -3  16  -9   12.48    6.91
  13   3  -9    2.12    5.28
  13   3  -8   19.22    8.15
  13   3  -7   69.43   19.26
  13   3  -6   85.24   19.56
  13   3  -5   20.42   10.22
   3 -16  -5   33.53   12.62
  13   3  -4   19.21    8.62
  13   3  -3   11.39    6.78
 -13  -3   0  118.07   21.84
  -3  16   0  114.41   11.66
  -3  16   1  189.15   19.16
  -3  16   2   58.29   12.24
  -3  16   3   20.59    7.52
  -3  16   3   25.56    8.68
  -3  16   4   31.87   10.52
  -3  16   4   14.17    6.16
 -16  13   5   10.83    3.59
  -3  16   5   17.21    5.38
  -3  16   5   22.21    8.67
  -3  16   6   96.39   21.75
 -16  13   6  107.12   23.16
  -3  16   7   46.26   14.85
 -13  -3   7   58.35   16.33
 -16  13   7   50.23   17.47
 -13  -3   8    9.12    8.86
 -16  13   8    6.60    9.61
  -3  16   8    1.34    8.79
 -13  -3   9    4.22    6.20
  -3  16   9   14.80   12.87
 -16  13   9   10.64    7.66
 -16  13  10   45.97   22.79
  -3  16  10    6.37    7.81
 -13  -3  10   25.03   14.34
 -16  13  11  -10.08   14.20
  -3  16  11    2.22   12.21
 -13  -3  11    8.96   10.09
  -3  16  12   23.56   17.39
 -13  -3  12   37.56   20.62
 -16  13  12   11.56   13.32
  -3  16  13    1.55   10.56
 -13  -3  13   -3.68    7.60
  -3  16  14   -3.71   13.94
 -13  -3  14    2.71    8.36
 -16  13  14   32.93   23.12
 -13  -3  15   -0.17   11.57
  -4  16  -9    6.93    5.02
  12   4  -8   18.38   10.05
  -4  16  -8    1.50    4.47
  12   4  -7  189.65   30.19
  -4  16  -7  122.27   15.01
  12   4  -6  134.14   24.05
  -4  16  -6   98.71   11.80
  12   4  -5  104.02   21.60
  -4  16  -5   58.20    6.79
  12   4  -4   45.85   13.13
  12   4  -3   53.68   14.39
  12   4  -2  102.29   20.58
  -4  16  -1    6.06    2.63
  -4  16   0   76.37   10.17
 -12  -4   0   77.25   17.85
  -4  16   1    0.17    5.38
  -4  16   2  105.01   16.13
  -4  16   3   61.11   13.71
  -4  16   4   36.18   11.55
  -4  16   4   26.80   10.82
  -4  16   5   82.23   14.93
  -4  16   5   98.77   21.35
  -4  16   6  114.11   22.23
 -16  12   7  184.85   31.98
  -4  16   7  144.83   27.91
 -12  -4   7  163.56   26.21
 -12  -4   8   11.35   11.11
  -4  16   8  -10.96   10.82
 -16  12   8   12.88    9.74
 -12  -4   9   14.40   12.22
  -4  16   9   15.21   13.68
 -16  12  10   34.68   19.01
  -4  16  10   30.82   18.28
 -12  -4  10   50.59   18.18
 -16  12  11  -18.10   14.40
  -4  16  11   -5.93   12.22
 -12  -4  11   10.76   10.37
 -12  -4  12   -3.29    9.46
  -4  16  12   10.55   11.39
 -16  12  12    0.59    7.60
  -4  16  13    7.32   10.68
 -12  -4  13   -8.61   10.41
 -16  12  13   18.97   16.27
  -4  16  14  -15.55   17.32
 -12  -4  14  -21.96   16.81
 -16  12  14  -11.18   11.52
 -12  -4  15   -7.24   12.82
  -5  16  -8   22.89    7.95
  -5  16  -7   60.96   11.03
  -5  16  -6   80.11   12.17
  11   5  -6  112.14   23.01
  11   5  -5   63.06   17.55
  -5  16  -5   46.57    7.90
  -5  16  -4    5.86    2.31
  11   5  -4   25.12   13.19
  11   5  -3   19.24   10.67
  -5  16  -3   12.49    3.03
  -5  16  -2   30.86    4.64
  11   5  -2   33.01   12.19
  11   5  -1  112.33   20.17
  -5  16  -1   99.84   10.23
  -5  16   0   68.89   10.22
  -5  16   1  121.26   15.36
  -5  16   2   39.49   10.17
  -5  16   3   24.94    9.04
  -5  16   4    5.20    6.68
  -5  16   4    7.36    6.65
 -16  11   4    3.00    2.86
  -5  16   5   50.08   11.19
  -5  16   5   66.45   17.08
  -5  16   6   77.91   20.01
 -11  -5   6  104.41   18.77
 -11  -5   7   92.40   18.72
  -5  16   7   72.29   20.96
 -16  11   7   93.31   23.84
 -11  -5   8   24.71   11.48
 -16  11   8   46.96   19.97
  -5  16   8   12.76   11.35
 -16  11   9   23.22   14.71
  -5  16   9   24.70   13.86
 -11  -5   9    8.23    6.31
 -16  11  10   30.53   14.87
  -5  16  10   16.80   15.08
 -11  -5  10   28.73   14.52
  -5  16  11   -3.50    7.71
 -11  -5  11    4.77   10.39
 -16  11  11    2.06    7.82
  -5  16  12   -1.36    8.70
 -11  -5  12   21.62   14.90
 -16  11  12    7.15   10.71
  -5  16  13   -8.39    8.53
 -11  -5  13   11.15   12.00
 -16  11  13   10.63   14.78
 -11  -5  14   -9.35   13.92
 -16  11  14    2.59   12.93
  -5  16  14   -7.52   11.07
 -11  -5  15    0.04    8.96
  -6  16  -8   23.17    9.45
  -6  16  -7   22.10    9.03
  -6  16  -6   24.13    7.69
 -10  -6  -5   24.10   12.46
  -6  16  -5   24.60    6.64
  10   6  -5   29.04   10.78
  10   6  -4  169.59   26.90
 -10  -6  -4  144.51   25.55
  -6  16  -4  119.43   13.05
  10   6  -3  168.11   27.03
  10   6  -2  277.78   33.40
  10   6  -1  210.41   29.40
  -6  16  -1  219.14   16.41
  10   6   0   30.89   11.43
  -6  16   0   29.48    6.92
  -6  16   1  207.11   20.49
  -6  16   2  259.25   25.85
  -6  16   3  138.62   21.11
 -16  10   4  137.62   16.18
  -6  16   4  151.95   24.45
  -6  16   4  145.46   18.44
  -6  16   5   29.11    8.27
  -6  16   5   25.60   12.39
 -10  -6   6   23.26   10.19
  -6  16   6    9.27    8.58
  -6  16   7   -1.22    9.42
 -10  -6   7    7.19    6.88
 -16  10   7   20.39   11.75
 -10  -6   8   25.99   11.21
  -6  16   8   34.22   14.47
 -16  10   8   41.15   18.58
 -16  10   9    0.99   10.33
  -6  16   9   15.79   12.02
 -10  -6   9   24.67    9.79
 -16  10  10   -2.22    7.12
 -10  -6  10   -6.19    6.33
 -16  10  11    1.53   13.95
  -6  16  11   13.03   14.83
 -10  -6  11   28.72   14.82
  -6  16  12    6.30   13.54
 -16  10  12  -17.17   19.16
 -10  -6  12   -5.14   10.52
 -10  -6  13   -4.21    8.55
  -6  16  13    2.24    8.19
 -16  10  13   15.77   18.37
  -6  16  14   18.92   14.42
 -10  -6  14   14.27   10.67
 -16  10  14   25.88   17.90
 -10  -6  15   10.53    7.75
  -7  16  -8    1.91    1.90
  -7  16  -7   33.39   10.78
  -7  16  -6    5.60    4.40
  -7  16  -5   58.77   11.22
  -9  -7  -5   61.65   17.82
  -9  -7  -4  122.34   23.86
   9   7  -4  119.56   22.82
  -9  -7  -4  109.16   22.22
   9   7  -3   73.78   17.91
  -9  -7  -3   59.73   14.63
   9   7  -2  105.24   20.95
   9   7  -1   17.55    7.24
   9   7   0  282.71   33.54
  -7  16   0  278.45   21.95
  -7  16   1   17.69    7.89
  -7  16   2   82.42   14.30
  -7  16   3   76.38   15.17
 -16   9   3   59.78   11.92
 -16   9   4   93.00   13.91
  -7  16   4  108.48   20.70
  -7  16   5   59.47   11.02
  -7  16   5   74.96   19.32
  -9  -7   6   11.81    8.18
  -7  16   6   15.73    8.23
  -9  -7   7   35.75   11.39
  -7  16   7   28.03   15.57
 -16   9   7   42.20   16.82
  -7  16   8   44.28   18.08
 -16   9   8   26.14   11.44
  -9  -7   8   14.71   10.27
 -16   9   9   -6.11   10.32
  -7  16   9    5.58    9.78
  -9  -7   9    6.85    5.55
 -16   9  10    2.45    7.61
  -7  16  10   -5.98   11.07
  -9  -7  10    6.83    9.50
  -7  16  11   -7.56   13.46
  -9  -7  11   11.69    9.91
 -16   9  11  -10.97   11.40
  -7  16  12   -1.06   12.20
  -9  -7  12   12.42    9.27
 -16   9  12    6.21    7.53
  -9  -7  13   -0.34    9.09
  -7  16  13   -6.37   16.41
  -9  -7  14   -7.11   14.42
 -16   9  14   15.41   15.41
  -7  16  14  -10.08   12.56
  -9  -7  15   -0.02   12.11
  -8  16  -9   20.51   10.69
  -8  16  -7    8.27    4.58
  -8  16  -6   36.88   10.59
  -8  16  -5   53.11   11.81
  -8  -8  -5   44.59   10.92
  -8  -8  -4   -0.73    4.77
  -8  -8  -4   17.50   11.41
  -8  -8  -3  345.79   38.67
   8   8  -3  369.41   38.80
  -8  -8  -3  332.01   35.31
  -8  -8  -2   59.60   13.82
   8   8  -2  100.97   20.63
   8   8  -1  116.46   22.60
   8   8   0   42.79   14.34
  -8  16   1  107.09   15.78
   8   8   1   81.78   18.66
  -8  16   2   71.27   14.09
 -16   8   3  296.91   26.73
  -8  16   3  340.83   33.21
  -8  16   4   24.98   12.79
 -16   8   4   18.54    7.01
  -8  16   5   49.46   15.90
  -8  -8   5   55.22   12.19
  -8  16   5   49.15    9.68
  -8  -8   6   47.55   12.35
  -8  16   6   52.10   15.23
  -8  16   7   -0.33    8.01
 -16   8   7   13.23   10.12
  -8  -8   7    0.36    5.06
 -16   8   8   67.84   20.49
  -8  16   8   62.50   20.91
  -8  -8   8   70.35   17.14
 -16   8   9   -8.97    8.71
  -8  16   9   11.72   12.27
  -8  -8   9    6.23    8.35
 -16   8  10    9.04   10.09
  -8  -8  10    1.09    7.57
  -8  16  10    7.22   10.52
 -16   8  11    4.14    7.39
  -8  -8  11   19.88   10.73
  -8  16  11   -8.88   13.08
  -8  -8  12    8.21    9.78
  -8  16  12  -11.34   15.96
 -16   8  12   33.26   18.21
  -8  -8  13    3.95   11.27
  -8  16  13   -0.92    8.79
 -16   8  13   18.99   17.60
  -8  -8  14   21.62   14.41
  -8  16  14  -13.69   16.78
 -16   8  14   11.50   10.80
 -16   8  15   12.63   15.80
  -9  16  -9   18.04    9.94
  -9  16  -6    1.04    4.38
  -7  -9  -5  143.23   25.67
  -7  -9  -5  115.11   23.66
  -7  -9  -4   80.28   18.70
  -7  -9  -4  106.82   22.78
  -7  -9  -3  374.92   36.66
  -7  -9  -2   22.83    8.67
   7   9  -2   39.41   13.60
   7   9  -1   41.94   12.54
   7   9   0  247.91   31.69
   7   9   1   60.24   16.68
  -9  16   2   21.25    8.19
 -16   7   2   12.52    7.21
   7   9   2   30.51   12.18
 -16   7   3  355.01   30.44
  -9  16   3  401.10   36.37
  -9  16   4   82.54   17.93
 -16   7   4   78.42   13.45
  -9  16   5  109.13   12.98
  -7  -9   5  126.99   16.76
  -9  16   5  149.14   25.79
  -7  -9   6    0.94    5.01
  -9  16   6    6.62    8.09
  -7  -9   7  133.65   19.78
  -9  16   7  162.58   29.14
 -16   7   7  148.15   28.16
  -7  -9   8   32.95   12.32
 -16   7   8   29.41   15.25
  -9  16   8   15.40   11.41
  -7  -9   9   12.77    8.19
  -9  16   9   23.94   16.40
 -16   7   9   30.54   15.52
 -16   7  10    9.93   10.41
  -7  -9  10   22.63   10.95
  -9  16  10   13.00   12.22
 -16   7  11   16.05   11.42
  -7  -9  11    3.97    5.94
  -9  16  11   13.79   15.72
  -7  -9  12    6.31    6.08
  -9  16  12    1.26   10.37
 -16   7  12  -16.41   15.31
  -7  -9  13    7.75   11.59
  -9  16  13    0.87    8.36
 -16   7  13   -4.19    8.61
  -9  16  14  -11.85   14.70
  -7  -9  14    5.46    6.74
 -16   7  15   14.95   14.44
 -10  16  -9    3.20    6.64
 -10  16  -8   21.78   10.51
 -10  16  -6    2.37    3.39
  -6 -10  -5    2.35    6.33
  -6 -10  -5   -1.73    4.92
  -6 -10  -4   74.98   16.71
  -6 -10  -3   25.99    8.68
  -6 -10  -2   72.00   14.35
   6  10  -1   11.89    5.60
  -6 -10  -1   25.93    8.87
   6  10   0   24.12   12.61
   6  10   1   14.32    6.28
   6  10   2   79.08   19.01
 -16   6   2   58.79   13.51
 -16   6   3   34.16   10.12
 -10  16   3   43.83   12.97
 -10  16   4   57.92   16.40
  -6 -10   4   70.53   10.30
 -10  16   5   -0.98    8.58
 -10  16   5   -1.70    2.95
  -6 -10   5    2.09    3.46
 -10  16   6   83.94   21.40
  -6 -10   6   65.64   12.02
 -10  16   7   64.05   22.35
  -6 -10   7   49.81   12.78
  -6 -10   8   22.25   10.32
 -16   6   8   32.00   16.05
 -10  16   8   46.63   19.42
  -6 -10   9    3.48    6.30
 -16   6   9   12.68   11.89
 -10  16   9   12.21   13.18
  -6 -10  10   -3.85    6.94
 -16   6  10    2.63    9.62
 -10  16  10    9.86   12.86
 -16   6  11    9.08   13.90
  -6 -10  11   -3.22    7.96
 -10  16  11    1.38   10.44
  -6 -10  12    5.09    8.37
 -10  16  12   25.29   11.75
  -6 -10  13    1.76    9.37
 -10  16  13   27.05   18.16
 -16   6  13   23.39   17.87
 -10  16  14   -3.30   11.54
 -16   6  14   13.94   17.20
 -16   6  15    8.69    9.46
 -11  16  -8   10.67    9.77
  -5 -11  -6   95.95   20.35
  -5 -11  -5  131.21   23.93
  -5 -11  -4   14.79    5.68
  -5 -11  -3   27.62    9.53
  -5 -11  -2   24.94    9.24
   5  11  -1  -16.29   10.47
  -5 -11  -1    7.30    5.87
   5  11   0   97.68   19.53
  -5 -11   0  101.83   13.60
 -16   5   1    2.07    4.58
   5  11   1    1.83    5.82
  -5 -11   1   -0.76    3.37
   5  11   2   25.55   11.04
 -16   5   2   27.03   10.07
 -16   5   3   12.87    4.69
  -5 -11   3   20.47    4.71
 -11  16   3   22.35    9.48
 -11  16   4   18.35    9.61
  -5 -11   4   12.93    4.13
 -11  16   5  110.16   11.11
  -5 -11   5  117.90   13.10
 -11  16   5  113.16   22.94
 -11  16   6  103.89   23.53
  -5 -11   6  106.07   14.61
  -5 -11   7    6.40    6.34
 -11  16   7   -0.74    7.12
  -5 -11   8   16.59    8.37
 -16   5   8   28.78   15.73
 -11  16   8   18.63   13.69
  -5 -11   9   39.92   12.95
 -16   5   9   52.14   19.32
 -11  16   9   55.14   20.50
  -5 -11  10   -2.51    6.84
 -16   5  10   -0.07    8.90
 -11  16  10    8.12   11.30
 -16   5  11  -20.35   16.59
  -5 -11  11   11.46    8.93
 -11  16  11   -4.41    8.97
  -5 -11  12   -4.49   10.91
 -11  16  12   19.74   16.85
 -16   5  12   -1.87    8.53
  -5 -11  13    0.07    7.08
 -11  16  13   -4.40    8.38
 -11  16  14   36.73   22.38
 -16   5  14   12.70   13.49
 -16   5  15   19.94   20.18
 -12  16  -8   34.14   12.13
 -12  16  -7    0.98    7.92
  -4 -12  -5   11.27    9.59
  -4 -12  -4  158.15   24.75
  -4 -12  -3   67.59   15.42
  -4 -12  -2   43.35   11.41
  -4 -12  -1   90.05   13.97
  -4 -12   0   36.19    7.32
   4  12   0   30.64   11.22
 -16   4   0   39.53   12.85
  -4 -12   1   78.61    9.33
 -16   4   1  103.14   19.87
   4  12   1   73.04   16.27
 -16   4   2   60.08   14.41
   4  12   2   51.48   13.66
  -4 -12   2   28.93    4.62
 -16   4   3   77.69   15.19
   4  12   3   76.01   16.78
  -4 -12   4  100.41    8.53
 -12  16   4  153.17   25.72
  -4 -12   5   13.82    4.43
 -12  16   5   11.08    6.65
  -4 -12   6   61.01   10.54
 -12  16   6   63.82   17.97
 -12  16   7  -23.00   12.24
  -4 -12   7   -6.22    5.14
 -12  16   8   46.95   17.32
  -4 -12   8   53.52   13.09
 -16   4   8   49.21   15.75
  -4 -12   9   15.02    7.90
 -16   4   9   21.54   14.15
 -12  16   9   35.44   18.01
  -4 -12  10    7.32    5.18
 -16   4  10    8.80    9.01
 -12  16  10   22.00   13.25
  -4 -12  11   16.13    8.93
 -16   4  11  -11.61   15.10
 -12  16  11   -1.42    9.69
  -4 -12  12   13.93   11.78
 -12  16  12   38.01   24.94
 -16   4  12   20.01   13.37
 -12  16  13    9.82   14.09
 -16   4  13   20.53   11.98
 -12  16  14   14.97   18.49
 -16   4  14   23.83   15.13
 -16   4  15   22.60   13.19
 -13  16  -7   11.76    8.80
  -3 -13  -5  111.69   22.42
  -3 -13  -4   51.72   13.94
  -3 -13  -3   46.49   12.27
  -3 -13  -2   11.12    5.92
  -3 -13  -1   30.29    7.61
 -16   3   0   18.38    9.82
  -3 -13   0   14.55    5.00
   3  13   0    3.77    5.23
   3  13   1   29.06   12.22
  -3 -13   1   18.28    3.77
 -16   3   1   19.73    7.80
   3  13   2    5.56    7.97
 -16   3   2   11.98    7.50
   3  13   3   55.84   14.32
 -13  16   4   46.02   13.85
 -13  16   5   99.10   21.60
 -13  16   6   31.39   13.32
 -13  16   7   -5.27    8.70
  -3 -13   7   13.41    6.81
 -16   3   8   26.45   12.63
 -13  16   8   22.65   12.93
  -3 -13   8   27.15    9.87
 -16   3   9   40.40   14.88
  -3 -13   9   28.22   10.67
 -13  16   9   38.76   17.56
 -16   3  10  -13.51   12.64
 -13  16  10   14.00   15.18
 -16   3  11    2.77    8.47
 -13  16  11   22.07   15.24
 -13  16  12   23.39   17.02
 -16   3  12    9.13    8.21
 -13  16  13   13.99   17.27
 -16   3  13   11.41   15.17
 -13  16  14   16.78   15.17
 -16   3  14  -10.93    8.32
 -16   3  15   20.76   19.84
  16  -2 -11    7.11    7.84
  16  -2 -10   29.44   11.77
  16  -2  -9   67.17   15.68
  -2 -14  -5   -4.54    7.27
  -2 -14  -4   -5.37    9.63
  -2 -14  -3  -15.34    9.07
  -2 -14  -2  156.30   19.65
 -16   2  -1   28.88   10.19
  -2 -14  -1   10.65    4.07
  -2 -14   0   68.65    9.00
 -16   2   0   95.81   19.70
 -16   2   1   26.07   10.49
   2  14   1   31.29   11.06
   2  14   2  184.48   27.16
 -16   2   2  196.18   26.48
   2  14   3    2.36    6.38
   2  14   4   24.34    8.91
 -14  16   5   -1.17    7.19
 -14  16   6   68.62   19.59
 -14  16   7  125.88   27.48
 -14  16   8   66.26   21.24
 -16   2   8   49.05   15.80
 -14  16   9   70.21   23.89
 -16   2   9   66.10   19.87
 -16   2  10   30.66   17.11
 -14  16  10   31.82   18.01
 -16   2  11    4.09   10.37
 -14  16  11   20.90   14.77
 -14  16  12   13.13   11.06
 -16   2  12  -22.24   13.55
 -14  16  13    9.43   18.34
 -16   2  13    8.13   14.03
 -14  16  14   17.08   17.29
 -16   2  14    1.59   11.83
 -16   2  15    2.87   12.61
  16  -1 -11   12.61   10.06
  16  -1 -10   16.69   11.42
  16  -1  -9   94.82   19.85
  16  -1  -8   21.58   10.82
  16  -1  -7   14.49    8.31
  -1 -15  -5   -6.47   10.01
  -1 -15  -4   29.14    9.85
  -1 -15  -3   -0.01    5.59
  -1 -15  -2   63.28   11.88
  -1 -15  -1   16.65    5.88
 -16   1   0    8.43    6.44
   1  15   1    8.60    5.61
 -16   1   1   22.35   10.55
 -16   1   2   77.80   17.83
   1  15   2   80.83   17.98
   1  15   3    4.57    6.88
   1  15   4   28.80   11.24
 -15  16   5   -2.17    8.87
   1  15   6    8.13   10.09
 -15  16   6   13.70   10.37
 -15  16   7   18.90   13.64
   1  15   7  -10.70   10.16
 -15  16   8   -2.10   10.54
   1  15   8    4.21    8.16
 -16   1   8    8.18   12.09
   1  15   9  100.57   26.97
 -15  16   9  107.35   29.18
 -16   1   9   88.77   25.32
 -16   1  10   15.02    8.47
   1  15  10   18.10   16.25
 -15  16  10   36.44   18.93
 -16   1  11   -7.99   11.10
 -15  16  11   23.63   16.77
   1  15  11    7.21   12.46
 -15  16  12   -8.05   10.74
 -16   1  12    7.10   13.23
 -15  16  13   -3.23   10.46
 -16   1  13   38.36   21.19
 -15  16  14    9.95   15.94
 -16   1  14    4.94   12.06
 -16   1  15   -3.68   12.99
  16   0 -11    9.37   10.41
  16   0 -10   10.20   11.27
  16   0  -9   14.55   10.21
  16   0  -8   48.38   15.78
  16   0  -7   16.77   11.20
  16   0  -6  -14.75   12.81
   0 -16  -5    1.32    6.17
   0 -16  -4   36.98   11.30
   0 -16  -3   -1.39    5.53
   0 -16  -2   38.20    8.80
 -16   0   1   18.43   11.69
   0  16   2   36.02   12.77
   0  16   3    9.02    8.04
   0  16   4   26.66    8.72
   0  16   4   28.99    8.56
   0  16   5    6.56    6.59
   0  16   6   14.20    9.56
 -16  16   6   -1.79    8.16
 -16  16   7    9.22   10.85
   0  16   7   12.13    9.87
   0  16   8   52.01   18.58
 -16  16   8   38.77   13.40
 -16   0   8   68.36   19.74
   0  16   9   16.00   13.33
 -16  16   9   16.46   14.06
 -16   0   9   27.51   13.20
   0  16  10    6.16    9.41
 -16   0  10   38.35   17.53
 -16  16  10   18.25   11.07
   0  16  11   -6.11    9.25
 -16   0  11   -2.22    9.80
 -16  16  11   -2.91   11.28
   0  16  12    2.40   11.22
 -16   0  12   -7.80   11.61
 -16  16  13   -2.12   12.47
 -16   0  13   11.05   12.67
 -16   0  14   -8.82   14.56
 -16   0  15   11.29   13.03
  16   1 -11    1.82    7.40
  16   1 -10   17.33   10.58
  16   1  -9   25.39   13.25
  16   1  -8   45.45   14.81
  16   1  -7   60.55   18.41
  16   1  -6    5.34    9.85
   1 -17  -5    5.37    7.02
   1 -17  -4   12.48    8.29
   1 -17  -3   56.36   13.44
  -1  17   2   94.26   21.19
  -1  17   3   27.55    9.68
  -1  17   3   51.58   14.50
  -1  17   4  -13.64   10.40
  -1  17   4   10.71    5.00
  -1  17   5   -2.79    9.81
  -1  17   6    1.99   10.62
 -17  16   6   19.42   14.23
  -1  17   7   82.69   24.52
 -17  16   7   56.72   20.70
  -1  17   8   53.74   20.69
 -17  16   8   72.18   23.54
 -16  -1   8   54.58   17.90
  -1  17   9   35.07   17.68
 -17  16   9   26.24   16.00
 -16  -1   9   33.75   16.22
  -1  17  10   28.02   16.46
 -17  16  10   16.93   13.93
 -16  -1  10   10.34   11.77
  -1  17  11    3.86    9.95
 -16  -1  11    1.27    8.42
 -17  16  11    8.51    9.53
  -1  17  12    1.87   15.29
 -17  16  12    5.48   12.20
 -16  -1  12   26.19   14.82
 -16  -1  13   24.68   19.31
 -17  16  13   22.80   22.65
  -1  17  13  -11.61   12.11
 -16  -1  14   29.62   20.82
  -1  17  14   18.08   18.48
 -16  -1  15   -1.07    8.68
  15   2 -12    5.56    8.11
  15   2 -11   -6.12    8.82
  15   2 -10    6.35   10.66
  15   2  -9    4.40    5.32
  15   2  -8   -1.01    9.33
  15   2  -7   24.88   10.14
  15   2  -6   -5.85   10.39
  15   2  -5   -7.88    8.67
   2 -17  -5   10.46    7.21
   2 -17  -4   12.52   10.72
  15   2  -4   -0.06    9.69
  -2  17   2   79.02   14.39
  -2  17   3   66.14   17.02
  -2  17   3   42.37   11.59
  -2  17   4    6.86    6.71
  -2  17   4    1.53    5.45
  -2  17   5   -4.73    7.94
  -2  17   5    5.87    5.81
 -17  15   5    4.35    2.73
  -2  17   6   -5.33    7.85
 -17  15   6    5.67    9.60
  -2  17   7   19.47   12.62
 -17  15   7   34.33   18.05
 -15  -2   7   61.09   17.63
  -2  17   8   12.42   12.48
 -17  15   8    7.12    8.49
 -15  -2   8   32.07   14.79
  -2  17   9   -2.47   12.30
 -17  15   9    8.55   10.92
 -15  -2   9    3.15    8.36
  -2  17  10    2.16   11.25
 -15  -2  10   10.22    6.87
 -17  15  10    7.28   13.32
  -2  17  11    2.74    8.59
 -17  15  11    0.02   10.22
 -15  -2  11   -8.78   13.22
  -2  17  12   18.80   18.29
 -15  -2  12   20.91   15.02
 -17  15  12   18.23   13.24
  -2  17  13   10.82   11.53
 -15  -2  13    3.43    8.65
 -17  15  13   32.04   18.26
  -2  17  14    3.53   18.23
 -15  -2  14   23.32   17.25
 -15  -2  15   -0.40    9.69
  14   3 -12   12.65   12.69
  14   3 -11    7.64   10.69
  14   3 -10    4.21    6.62
  14   3  -9   23.59   11.86
  14   3  -8    6.52    7.07
  14   3  -7   96.21   21.38
  14   3  -6   -1.92    8.36
  14   3  -5   53.22   15.72
   3 -17  -5   76.71   18.02
  14   3  -4  121.08   23.46
  14   3  -3   31.96   13.24
  -3  17   0    5.54    3.40
  -3  17   1   40.35    8.23
  -3  17   2   56.20   12.36
  -3  17   3   41.23   12.97
  -3  17   3   21.44   10.22
  -3  17   4  136.69   22.29
  -3  17   4  128.26   22.21
  -3  17   5   48.90   13.83
 -17  14   5   45.59    7.50
  -3  17   5   66.92   18.39
  -3  17   6  -18.75   13.61
  -3  17   7   92.55   23.66
 -17  14   7   92.40   23.42
 -14  -3   7   87.25   19.87
  -3  17   8   16.50   10.96
 -14  -3   8   27.75   13.72
 -17  14   8    3.68    9.36
 -14  -3   9    9.82    6.72
 -17  14   9   -1.32   10.02
  -3  17   9    6.50    9.69
 -14  -3  10   11.20   10.17
 -17  14  10    2.90    9.86
  -3  17  10   -9.83   16.19
 -17  14  11   10.94   14.90
 -14  -3  11   32.01   14.47
  -3  17  11    5.55   10.11
  -3  17  12   -3.86   10.88
 -14  -3  12   -8.69   12.24
 -17  14  12   14.89   11.50
  -3  17  13  -11.20   16.15
 -14  -3  13   10.22   12.92
 -17  14  13   37.43   20.67
  -3  17  14    2.06   15.66
 -14  -3  14    1.85    7.79
 -17  14  14   14.64   14.02
 -14  -3  15   -8.48    9.59
  13   4 -12   10.45   10.57
  13   4 -11   12.34   10.56
  13   4 -10    6.68    7.28
  13   4  -9    7.04    6.58
  13   4  -8   64.15   18.13
  -4  17  -8   55.88   11.80
  13   4  -7   41.17   15.48
  -4  17  -7   19.87    6.28
  13   4  -6    5.00    7.17
  13   4  -5   22.54   11.68
  13   4  -4   41.84   15.19
  13   4  -3   -6.41    9.37
  13   4  -2   56.40   14.34
  -4  17  -1   65.66    6.77
  -4  17   0   -1.69    2.58
  -4  17   1  104.18   14.69
  -4  17   2   64.80   12.98
  -4  17   3   -0.15    6.83
  -4  17   3   -0.72    4.11
  -4  17   4   45.34   13.48
  -4  17   4   47.40   14.14
 -17  13   5   19.69    4.99
  -4  17   5   10.63    7.80
  -4  17   5    8.96    7.86
  -4  17   6   11.67    8.18
 -13  -4   7   50.67   16.06
 -17  13   7   52.57   18.57
  -4  17   8   46.89   18.55
 -13  -4   8   65.17   17.83
 -17  13   8   75.44   23.50
 -13  -4   9   29.32   13.67
  -4  17   9    8.20    8.33
 -17  13   9    3.49    8.22
 -17  13  10   15.04   14.79
  -4  17  10   -2.75   11.18
 -13  -4  10   13.75   13.17
 -17  13  11   12.68   12.88
  -4  17  11   23.62   17.57
 -13  -4  11   25.93   13.43
  -4  17  12    3.03   14.30
 -13  -4  12   17.66   14.31
 -17  13  12   13.41   10.24
  -4  17  13   -5.31   14.48
 -13  -4  13   -0.98   10.39
 -17  13  13   23.71   17.10
  -4  17  14  -25.63   23.96
 -13  -4  14    2.38   13.11
 -17  13  14   -4.50   13.94
 -13  -4  15   -6.92   10.30
  -5  17  -8   50.45   11.51
  12   5  -8   65.13   18.68
  -5  17  -7   55.10    9.82
  12   5  -7   77.06   18.67
  -5  17  -6   77.09   10.15
  12   5  -6   85.31   20.19
  -5  17  -5   25.21    4.89
  12   5  -5   23.48   11.36
  12   5  -4   47.89   15.70
  12   5  -3   49.01   14.54
  12   5  -2   47.12   14.37
  -5  17  -1   40.90    6.57
  12   5  -1   34.33    9.75
  -5  17   0    0.97    3.20
  -5  17   1   56.30   10.77
  -5  17   2   50.14   11.42
  -5  17   3   65.07   14.48
  -5  17   4   37.43   13.51
  -5  17   4   48.41   12.63
 -17  12   4   28.17    7.31
  -5  17   5   46.85   11.10
  -5  17   5   43.99   14.52
 -17  12   5   33.16    6.81
  -5  17   6   81.93   21.03
  -5  17   7   53.21   16.91
 -12  -5   7   70.86   16.51
 -17  12   7   97.99   23.78
 -12  -5   8   83.14   20.31
  -5  17   8   64.34   19.05
 -17  12   8   52.41   20.03
 -17  12   9   -6.49    9.38
  -5  17   9   -8.96   12.21
 -12  -5   9  -15.08   11.08
 -17  12  10   46.96   18.90
  -5  17  10   21.48   14.68
 -12  -5  10   38.04   15.69
 -17  12  11    1.79   13.23
  -5  17  11   12.60   12.66
 -12  -5  11   41.96   16.37
 -12  -5  12   14.60   14.59
 -17  12  12    6.29   11.66
  -5  17  13   15.85   12.69
 -12  -5  13   14.97   14.94
 -17  12  13    5.83    7.76
 -12  -5  14   -1.27    7.50
 -17  12  14   32.79   17.27
  -5  17  14   22.03   16.54
 -12  -5  15    0.70   11.18
  -6  17  -8   53.23   12.33
  -6  17  -7   -4.17    5.79
  11   6  -6   84.01   20.73
  -6  17  -6   60.95   10.61
  -6  17  -5   70.31   10.40
  11   6  -5   70.81   18.16
  -6  17  -4   96.24   10.54
 -11  -6  -4  117.28   22.84
  11   6  -4  143.02   26.00
  11   6  -3  120.97   23.69
  -6  17  -2   24.16    5.11
  11   6  -2   28.10   10.20
  -6  17  -1   20.58    5.29
  11   6  -1   12.81    5.96
  -6  17   0   33.71    6.87
  -6  17   1   16.86    5.08
  -6  17   2   26.92    8.96
  -6  17   3  154.94   22.71
 -17  11   4  124.78   15.59
  -6  17   4  136.07   19.07
  -6  17   4  171.12   25.41
  -6  17   5   62.47   12.26
  -6  17   5   79.37   19.73
  -6  17   6   55.41   15.79
 -11  -6   6   70.01   15.17
 -11  -6   7    6.16    8.62
  -6  17   7    6.34    9.47
 -17  11   7   13.54   12.48
 -11  -6   8   58.34   15.41
  -6  17   8   59.29   18.27
 -17  11   8   86.05   23.47
 -17  11   9   32.17   17.22
  -6  17   9   27.54   14.19
 -11  -6   9   13.28    9.53
 -17  11  10   -1.84    7.32
  -6  17  10    7.43   11.20
 -11  -6  10   21.88   13.19
 -17  11  11   33.12   17.24
 -11  -6  11   14.81   11.61
  -6  17  11   -2.68    8.23
  -6  17  12   14.46   16.14
 -17  11  12   -2.61    8.10
 -11  -6  12   -0.01    9.98
  -6  17  13    7.68   15.84
 -11  -6  13    3.05    9.93
 -17  11  13   15.72   16.17
  -6  17  14   -1.51    9.90
 -11  -6  14   14.07    9.85
  -7  17  -8    6.33    5.77
  -7  17  -7   80.23   14.59
  -7  17  -6   25.80    8.69
  -7  17  -5    8.59    4.92
  10   7  -5  -16.00   11.24
  10   7  -4  149.23   26.74
  -7  17  -4  121.05   14.05
 -10  -7  -4  151.33   27.41
  10   7  -3   74.15   18.82
 -10  -7  -3   51.46   14.52
  10   7  -2  137.42   25.43
  10   7  -1   -1.86    4.98
  10   7   0   22.38   10.33
  -7  17   0   35.21    8.64
  -7  17   1    0.26    5.12
  -7  17   2  141.58   20.13
  -7  17   3   50.35   13.30
 -17  10   4  128.04   16.89
  -7  17   4  146.83   19.82
  -7  17   4  179.01   26.62
  -7  17   5    8.71    5.54
  -7  17   5   -0.37    5.82
 -10  -7   6   29.12    9.51
  -7  17   6   13.29    7.97
 -10  -7   7   82.08   17.52
  -7  17   7   71.12   19.94
 -17  10   7  115.05   27.11
  -7  17   8    8.03   11.11
 -17  10   8    7.45    9.36
 -10  -7   8   -2.51    8.11
 -17  10   9   14.94    7.01
  -7  17   9   -4.70    8.49
 -10  -7   9   17.25    9.97
 -17  10  10   -7.96   15.31
  -7  17  10   -9.61   14.99
 -10  -7  10    2.07    7.70
 -17  10  11  -15.94   15.78
  -7  17  11   34.54   18.04
 -10  -7  11   11.40   11.46
  -7  17  12  -10.07   15.00
 -10  -7  12   10.29   11.59
 -17  10  12  -28.31   20.66
  -7  17  13  -14.05   13.56
 -10  -7  13   13.77   13.09
 -17  10  13   30.52   18.87
  -7  17  14    6.29    8.63
 -10  -7  14   -5.05   11.58
 -17  10  14   11.04   17.97
  -8  17  -7   13.71    6.49
  -8  17  -6   -8.27    6.48
  -8  17  -5   18.83    6.47
  -9  -8  -5   20.77    9.50
  -9  -8  -4   93.55   20.89
   9   8  -4  106.32   22.24
   9   8  -3   32.25   13.46
  -9  -8  -3   25.83    9.97
   9   8  -2   48.35   16.61
   9   8  -1   12.72    7.34
   9   8   0  193.90   29.63
  -8  17   1    1.05    3.91
   9   8   1   -1.68    8.58
  -8  17   2   45.28   11.64
  -8  17   3    7.62    6.67
 -17   9   3   17.79    7.26
 -17   9   4   73.55   13.19
  -8  17   4   93.48   18.98
  -9  -8   5   16.33    7.79
  -8  17   5   21.73    7.56
  -8  17   5    4.15    5.41
  -9  -8   6    8.84    5.71
  -8  17   6    1.40    7.90
  -9  -8   7   11.77    6.87
  -8  17   7   13.14    9.75
  -8  17   8   -2.16    8.49
 -17   9   8    4.55    7.76
  -9  -8   8   -6.86    9.22
 -17   9   9   19.03   12.99
  -8  17   9   -6.69    9.54
  -9  -8   9   15.92    9.38
 -17   9  10   -2.75    7.60
  -8  17  10   -9.25   14.12
  -9  -8  10   -0.75    7.45
 -17   9  11    3.00    9.64
  -8  17  11   -1.32   12.50
  -9  -8  11    3.39    6.61
  -9  -8  12    7.82   10.29
  -8  17  12   -3.50    8.22
 -17   9  12    1.60   11.84
  -9  -8  13   17.10   13.40
  -8  17  13   21.13   11.98
 -17   9  13   49.26   25.40
  -9  -8  14   -6.51    6.95
  -8  17  14  -23.70   19.77
 -17   9  14    7.96   12.70
  -9  17  -9   10.64    7.16
  -9  17  -7    0.43    5.55
  -9  17  -6   60.58   13.72
  -8  -9  -5  105.54   22.54
  -9  17  -5   82.24   13.66
  -8  -9  -4   16.49    9.30
   8   9  -3   95.41   21.99
  -8  -9  -3   77.29   18.04
  -8  -9  -2   14.49    6.97
   8   9  -2   33.47   14.31
   8   9  -1   90.52   20.18
   8   9   0   90.10   19.95
   8   9   1   85.84   19.17
  -9  17   1   73.27   13.21
  -9  17   2   15.42    7.03
  -9  17   3   94.91   18.44
 -17   8   3   91.86   16.29
 -17   8   4   15.83    7.37
  -9  17   4   15.84    9.67
  -9  17   5  105.95   21.73
  -9  17   5  108.03   14.29
  -8  -9   5  100.43   15.50
  -8  -9   6   62.88   11.93
  -9  17   6   43.34   14.72
  -9  17   7   18.66   11.51
  -8  -9   7   18.33    6.53
  -8  -9   8   31.78   11.10
 -17   8   8   29.06   14.52
  -9  17   8   39.68   17.26
 -17   8   9   21.44   12.89
  -8  -9   9   22.90   10.57
  -9  17   9   23.93   15.65
 -17   8  10   20.87   12.97
  -8  -9  10    8.16    7.84
  -9  17  10   -3.25    8.65
 -17   8  11    3.12    7.93
  -8  -9  11   17.71   11.11
  -9  17  11    0.99    8.49
  -8  -9  12   20.61   10.93
  -9  17  12    8.46   11.86
 -17   8  12    1.28    9.29
  -8  -9  13   13.37   13.64
  -9  17  13    8.98   14.28
 -17   8  13   -0.56    9.00
  -9  17  14   -8.07   15.73
 -17   8  14   31.20   16.33
 -10  17  -9   19.20   10.47
 -10  17  -6   19.06    7.69
  -7 -10  -5   18.35   11.06
  -7 -10  -4   13.83    7.43
  -7 -10  -3   12.01    7.73
  -7 -10  -2   91.45   18.09
   7  10  -2  141.69   25.84
   7  10  -1  253.23   32.33
  -7 -10  -1  228.48   24.70
   7  10   0   48.00   15.19
   7  10   1  230.31   30.72
 -17   7   2   98.04   17.84
 -10  17   2  102.70   17.19
   7  10   2   80.57   19.67
 -17   7   3    9.60    6.83
 -10  17   3    2.27    6.19
 -17   7   4   14.11    4.28
 -10  17   4   28.74   12.21
  -7 -10   4   30.78    7.57
  -7 -10   5   10.76    5.97
 -10  17   5   -6.53    8.89
 -10  17   5   12.05    5.04
 -10  17   6   23.23   11.98
  -7 -10   6   38.59   10.00
  -7 -10   7   23.81    9.53
 -10  17   7   16.79   12.41
  -7 -10   8   28.73   10.81
 -17   7   8   42.03   16.99
 -10  17   8   29.34   15.45
  -7 -10   9   16.22    8.59
 -17   7   9   30.37   16.33
 -10  17   9   24.67   13.98
 -17   7  10   22.96   12.44
  -7 -10  10   12.86    9.34
 -10  17  10    8.78   12.03
 -17   7  11   13.01   10.00
  -7 -10  11   14.78   11.37
 -10  17  11   20.07   19.53
  -7 -10  12    9.86   11.47
 -10  17  12   14.81   11.93
 -17   7  12    0.48   10.80
  -7 -10  13   12.42   14.99
 -10  17  13   -8.05    8.73
 -17   7  13   21.87   17.82
 -10  17  14   -8.91   14.53
 -17   7  14   20.05   16.90
 -11  17  -8   31.97   12.47
  -6 -11  -5   35.76   12.67
  -6 -11  -4   81.20   17.97
  -6 -11  -3  111.66   19.95
  -6 -11  -2   31.88   10.19
   6  11  -1   64.03   17.14
  -6 -11  -1   44.79   10.63
   6  11   0  274.61   34.91
  -6 -11   0  251.24   22.93
 -17   6   1   56.21   13.79
   6  11   1   52.01   16.45
   6  11   2   32.49   12.50
 -17   6   2   16.46    9.62
 -17   6   3  107.44   18.19
 -11  17   3  112.93   19.61
 -11  17   4   81.01   17.90
  -6 -11   4   92.84   11.45
 -11  17   5   34.14   13.46
 -11  17   5   28.13    6.74
  -6 -11   5   21.84    6.07
 -11  17   6  110.40   24.52
  -6 -11   6  103.73   14.38
  -6 -11   7   13.55    6.52
 -11  17   7   26.60   12.28
  -6 -11   8   26.84    9.66
 -17   6   8   56.07   18.21
 -11  17   8   47.09   16.97
  -6 -11   9    7.45    4.84
 -17   6   9   -0.74    6.37
 -11  17   9   15.90   13.50
  -6 -11  10   49.47   16.27
 -17   6  10   33.28   15.92
 -11  17  10   39.28   20.38
 -17   6  11    1.44    7.47
  -6 -11  11    5.79    6.43
 -11  17  11    3.41   10.90
  -6 -11  12   11.95   10.54
 -11  17  12  -17.99   15.99
 -17   6  12    2.29   12.05
 -11  17  13   -7.61   10.29
 -17   6  13    9.51   16.07
 -11  17  14   -2.09   11.69
 -17   6  14   27.33   18.64
 -12  17  -8   -3.01    5.75
 -12  17  -7   -3.79    7.48
  -5 -12  -5    5.28    8.09
  -5 -12  -4   -8.69    8.46
  -5 -12  -3   34.62   10.99
  -5 -12  -2   -3.74    5.14
  -5 -12  -1   23.72    8.03
   5  12  -1   34.89   13.61
  -5 -12   0    8.94    5.13
   5  12   0   24.34   11.60
  -5 -12   1   22.72    6.43
   5  12   1   11.87    8.87
 -17   5   1   32.26   10.74
   5  12   2    6.22    7.12
 -17   5   2   -1.54    6.71
  -5 -12   2   -1.87    2.47
 -17   5   3   37.78   10.01
  -5 -12   3   29.30    4.86
   5  12   3   34.21   11.29
 -12  17   3   26.62    9.39
 -12  17   4   -0.40    6.05
  -5 -12   4    5.51    2.83
 -12  17   5    6.69    9.02
  -5 -12   5    9.16    3.74
 -12  17   6   33.32   13.37
  -5 -12   6   34.59    8.07
 -12  17   7  -16.33   13.12
  -5 -12   7   -0.67    3.71
  -5 -12   8    9.08    6.02
 -17   5   8    7.70   10.64
 -12  17   8  -14.06   12.63
  -5 -12   9   13.82    7.29
 -17   5   9    5.84    7.19
 -12  17   9   26.07   16.25
 -17   5  10   25.53   14.92
 -12  17  10   31.00   20.12
  -5 -12  10   19.37   11.90
  -5 -12  11    9.49   11.29
 -17   5  11    3.79    9.01
 -12  17  11    4.90    9.60
  -5 -12  12   -2.51    7.78
 -12  17  12   16.10   15.18
 -17   5  12  -13.51   16.40
 -12  17  13   -5.32   10.47
 -17   5  13   33.71   21.39
 -12  17  14   54.98   25.91
 -17   5  14   16.96   14.66
 -17   5  15   14.56   16.49
 -13  17  -7   13.37    7.03
  -4 -13  -5   12.65   10.21
  -4 -13  -4   87.23   18.25
  -4 -13  -3   -1.07    4.23
  -4 -13  -2   11.38    4.90
  -4 -13  -1    4.74    4.32
 -17   4   0   36.41   12.56
   4  13   0   27.87    9.27
  -4 -13   0   30.36    7.37
  -4 -13   1    1.94    2.27
 -17   4   1   -0.59    6.61
   4  13   1    6.55    7.77
 -17   4   2   19.32    8.78
   4  13   2   17.03   10.54
   4  13   3    3.02    5.40
 -17   4   3   -3.63    6.21
 -13  17   4   96.82   20.71
  -4 -13   5    5.78    2.67
 -13  17   5   18.58   10.10
  -4 -13   6    1.44    2.86
 -13  17   6    1.65    7.83
  -4 -13   7   18.64    7.33
 -13  17   7   14.31   12.11
 -13  17   8   13.00   10.02
 -17   4   8   11.15   11.12
  -4 -13   8   17.75    7.71
 -17   4   9    5.84    8.85
 -13  17   9  -12.24   12.37
  -4 -13   9    8.76    4.88
 -17   4  10    7.89    9.82
  -4 -13  10   -4.81    5.66
 -13  17  10   10.24   13.75
 -17   4  11    4.34   10.11
 -13  17  11   32.13   18.11
  -4 -13  11   12.88   11.71
 -13  17  12   12.72   12.79
 -17   4  12  -12.50   15.41
 -13  17  13    2.41    9.66
 -17   4  13   19.37   15.43
 -13  17  14   24.41   20.25
 -17   4  14    8.44   11.50
 -17   4  15    7.67   15.71
  -3 -14  -5   46.24   13.80
  -3 -14  -4   32.80   10.85
  -3 -14  -3   31.22    9.85
  -3 -14  -2   48.12   10.82
  -3 -14  -1   42.38    9.57
 -17   3   0   -9.58    7.43
  -3 -14   0    4.35    3.48
   3  14   0   -2.20    6.81
 -17   3   1   56.77   16.06
   3  14   1   63.02   17.03
 -17   3   2   61.23   14.64
   3  14   2   58.20   16.10
   3  14   3   30.35   11.00
 -14  17   4   21.35   12.72
 -14  17   5   42.00   14.82
 -14  17   6   48.03   17.00
 -14  17   7   30.60   14.74
 -14  17   8   53.95   19.95
 -17   3   8   38.77   15.77
 -14  17   9   10.45   12.15
 -17   3   9    7.67    8.80
 -17   3  10    1.96    7.80
 -14  17  10   16.86   13.33
 -17   3  11  -18.48   14.69
 -14  17  11   27.51   18.38
 -14  17  12   18.13   16.54
 -17   3  12  -17.59   18.62
 -14  17  13    5.05   14.75
 -17   3  13   43.79   21.05
 -14  17  14   18.30   17.82
 -17   3  14   10.37    9.27
 -17   3  15    0.26    9.70
  -2 -15  -5   -0.05    5.35
  -2 -15  -4   -4.18    8.56
  -2 -15  -3   45.77   12.13
  -2 -15  -2   23.56    8.20
  -2 -15  -1   -3.68    4.33
  -2 -15   0   20.49    4.89
   2  15   1    6.44    8.11
 -17   2   1    7.97    8.45
   2  15   2   29.88   12.92
 -17   2   2   45.13   12.87
   2  15   3   37.79   10.98
   2  15   4    3.92    7.46
 -15  17   5    5.02    5.90
 -15  17   6   22.74   13.81
 -15  17   7   -2.51    9.16
 -15  17   8   21.91   14.12
 -17   2   8   46.14   17.63
 -15  17   9    0.46    7.39
 -17   2   9    8.36    9.24
 -17   2  10   -2.95    7.29
 -15  17  10   14.94   12.22
 -17   2  11    6.70    7.85
 -15  17  11   -6.55   11.95
 -15  17  12   19.02   15.65
 -17   2  12   -8.68   11.51
 -15  17  13    8.21   13.97
 -17   2  13   28.45   19.41
 -17   2  14   14.32   14.52
 -17   2  15   -0.57    9.37
  17  -1 -11    9.51    8.46
  17  -1 -10   44.82   15.30
  17  -1  -9    2.68    5.93
  -1 -16  -5   27.80   11.89
  -1 -16  -4    3.22    5.66
  -1 -16  -3   38.14   10.22
  -1 -16  -2    7.36    5.43
  -1 -16  -1    0.35    2.66
   1  16   1    3.37    5.73
 -17   1   2    7.91    6.20
   1  16   2   15.43   10.91
   1  16   3   60.76   16.26
   1  16   4    7.70    7.89
 -16  17   5   51.37   16.39
 -16  17   6  111.83   25.51
 -16  17   7    0.51    8.09
 -16  17   8   24.63   17.03
   1  16   8   49.09   17.75
 -17   1   8   52.97   18.18
 -16  17   9    1.74    8.14
 -17   1   9   17.13   12.54
   1  16   9   12.27   14.73
 -16  17  10   37.11   20.16
 -17   1  10   35.31   17.12
 -17   1  11   22.87   14.43
 -16  17  11    1.83   11.44
 -16  17  12   12.41   18.45
 -17   1  12   -9.65    8.83
 -16  17  13   12.46   18.16
 -17   1  13   10.04   11.62
 -17   1  14   37.57   21.52
 -17   1  15   17.28   16.54
  17   0 -11   20.92   12.20
  17   0 -10   54.24   17.31
  17   0  -9    7.32    6.33
  17   0  -8    4.02    9.00
   0 -17  -5  134.98   24.52
   0 -17  -4   30.88   10.62
   0 -17  -3    6.21    4.86
   0 -17  -2   21.64    7.45
   0  17   2    5.50    7.58
   0  17   3   12.98   10.28
   0  17   4    4.52    5.85
   0  17   5  127.51   23.98
 -17  17   6   75.81   21.51
   0  17   6   70.80   19.36
   0  17   7    4.35    7.92
 -17  17   7    5.35    9.12
   0  17   8   -2.91    9.33
 -17  17   8   -9.82   10.26
 -17   0   8    7.44    8.79
 -17   0   9    4.14    8.65
   0  17   9  -10.39   11.32
 -17  17   9    3.28   11.12
 -17  17  10   29.44   20.68
 -17   0  10   44.89   16.95
   0  17  10   14.51   14.91
 -17   0  11    7.10    7.25
 -17  17  11   -7.27   12.86
   0  17  11    4.82   13.28
 -17  17  12   14.43   16.45
 -17   0  12   16.37   16.06
 -17  17  13   33.90   21.95
 -17   0  13   32.39   18.95
 -17   0  14   16.76   16.48
 -17   0  15   24.05   15.90
  17   1 -11    8.86    9.39
  17   1 -10   13.32   10.99
  17   1  -9   -2.50    8.03
  17   1  -8   -2.44    8.87
  17   1  -7    4.89    6.54
   1 -18  -5   57.38   16.70
   1 -18  -4   36.87   14.62
  -1  18   2   19.95   10.59
  -1  18   3    8.11    8.76
  -1  18   4   17.82   10.98
  -1  18   4    0.16    7.08
  -1  18   5   58.73   16.49
  -1  18   5   46.79   12.40
  -1  18   6   20.91   11.78
 -18  17   6   13.77   12.36
  -1  18   7    6.61    8.70
 -18  17   7    7.69    6.59
  -1  18   8   -0.45    8.61
 -17  -1   8    6.43    9.61
  -1  18   9   -2.09    9.92
 -18  17   9   -9.73   11.03
 -17  -1   9   15.67   11.78
 -18  17  10    3.76    8.43
 -17  -1  10   18.10   12.09
  -1  18  10    4.98   11.63
 -18  17  11   -7.09   13.55
  -1  18  11  -23.90   17.89
 -17  -1  11   -1.27    9.75
 -18  17  12   34.38   21.90
 -17  -1  12   31.88   17.31
  -1  18  12   15.92   13.78
  -1  18  13   13.59   13.73
 -17  -1  13   42.96   21.70
 -18  17  13   27.35   21.51
 -17  -1  14   21.59   16.52
 -17  -1  15   18.22   14.25
  16   2 -11   -7.89    7.94
  16   2 -10   -1.42    7.08
  16   2  -9   19.47   10.94
  16   2  -8   -2.13    7.04
  16   2  -7   30.60   13.88
  16   2  -6  -15.77   11.26
   2 -18  -5   24.85   11.11
  16   2  -5   13.31    8.75
  -2  18   2   15.26    7.80
  -2  18   3   11.09    6.49
  -2  18   3   35.02   13.55
  -2  18   4   75.11   18.49
  -2  18   4   79.62   18.53
 -18  16   5    0.93    2.33
  -2  18   5    3.52    6.18
  -2  18   5   -7.55    6.48
  -2  18   6   -8.23   11.55
 -18  16   6    3.06    8.24
  -2  18   7   65.13   20.88
 -18  16   7   49.98   17.86
  -2  18   8    6.38   10.46
 -18  16   8    8.21    8.92
 -16  -2   8   21.36   12.51
  -2  18   9   18.37   11.71
 -18  16   9   37.43   20.35
 -16  -2   9   35.18   15.02
 -18  16  10   10.61    9.98
 -16  -2  10    3.33    8.91
  -2  18  10   -3.85    7.62
 -18  16  11   -0.99   10.76
  -2  18  11   30.04   20.81
 -16  -2  11    9.31   11.93
  -2  18  12   12.89   14.13
 -16  -2  12    6.14   10.33
 -18  16  12   19.11   16.92
  -2  18  13   -0.61   15.16
 -16  -2  13   42.59   21.72
 -18  16  13   48.50   27.39
  -2  18  14   15.06   17.91
 -16  -2  14    4.62   10.88
 -16  -2  15   -9.43   11.20
  15   3 -12   -2.12    6.94
  15   3 -11   13.19    8.21
  15   3 -10   12.94   10.74
  15   3  -9    7.09    9.84
  15   3  -8    1.36    8.05
  15   3  -7   -9.84    9.81
  15   3  -6   -3.75    5.94
  15   3  -5    5.70    6.15
  15   3  -4  213.60   32.50
  -3  18   1   83.99   12.95
  -3  18   2    0.90    3.86
  -3  18   3  118.59   20.26
  -3  18   3  120.95   21.84
  -3  18   4  245.76   31.96
  -3  18   4  235.27   29.72
  -3  18   5   14.76    9.41
  -3  18   5    5.43    5.46
 -18  15   5    6.79    3.38
  -3  18   6    1.27    9.05
  -3  18   7  -12.38   13.70
 -18  15   7    0.54    8.34
 -15  -3   7    2.80    7.61
  -3  18   8    0.18    7.66
 -15  -3   8   16.54   10.35
 -18  15   8   19.51   14.17
  -3  18   9    2.74    7.26
 -15  -3   9    5.46    6.46
 -18  15   9    3.40    8.83
 -15  -3  10   -1.31    8.73
 -18  15  10   -0.91    8.55
  -3  18  10   -1.28    7.38
 -18  15  11  -15.44   10.58
  -3  18  11   18.63   18.30
 -15  -3  11  -16.80   12.85
  -3  18  12   -4.39   11.60
 -15  -3  12   27.47   17.36
 -18  15  12  -11.95   13.15
  -3  18  13   28.43   24.36
 -15  -3  13   22.95   14.20
 -18  15  13   13.31   14.23
  -3  18  14    0.21   13.65
 -15  -3  14   31.86   18.30
 -15  -3  15  -12.38   11.02
  14   4 -12   -5.12    7.69
  14   4 -11    5.65    6.94
  14   4 -10   -2.90    6.61
  14   4  -9   10.58    9.45
  14   4  -8    2.58    8.54
  14   4  -7   10.70    9.25
  14   4  -6    0.25    9.49
  14   4  -5   19.15    9.28
  14   4  -4   23.36   13.31
  14   4  -3   74.55   18.85
  -4  18   0    3.63    2.17
  -4  18   1  139.99   16.77
  -4  18   2   30.45    9.33
  -4  18   3   55.83   13.85
  -4  18   3   71.87   15.93
  -4  18   4   10.75    9.63
  -4  18   4    6.95    8.66
  -4  18   5   41.73   14.92
  -4  18   5   27.75    8.73
 -18  14   5   26.24    5.97
  -4  18   6   10.20    8.37
  -4  18   7    4.82    9.51
 -14  -4   7   10.95    9.98
 -18  14   7   -5.37   10.97
 -14  -4   8   -3.31    6.78
 -18  14   8   16.38   13.54
 -14  -4   9    8.41    8.92
  -4  18   9   -2.18    8.22
 -18  14   9   27.88   15.97
 -14  -4  10   -1.88    6.96
  -4  18  10   28.42   14.68
 -18  14  10   13.41   13.80
 -18  14  11   13.91   14.15
  -4  18  11   -7.89    8.51
 -14  -4  11   -2.62    8.01
  -4  18  12    1.11    9.63
 -14  -4  12   13.70   12.30
 -14  -4  13    4.45    9.39
  -4  18  13   -5.95    9.03
 -18  14  13   19.70   20.17
  -4  18  14    9.40   14.02
 -14  -4  14  -11.11   17.67
 -14  -4  15    9.32    7.84
  13   5 -12   -4.22    7.71
  13   5 -11   23.91   14.65
  13   5 -10   19.79   11.13
  13   5  -9    1.70    9.80
  -5  18  -8    8.48    4.71
  13   5  -8   -2.67    8.77
  13   5  -7   16.95    8.33
  -5  18  -7   27.03    6.54
  -5  18  -6   27.13    5.48
  13   5  -6   16.36   10.07
  13   5  -5   -8.28   12.64
  13   5  -4   12.01    6.85
  13   5  -3   46.74   12.50
  13   5  -2   31.97   10.04
  -5  18  -1   50.51    6.95
  -5  18   0  107.05   13.14
  -5  18   1   67.67   11.96
  -5  18   2   57.58   12.58
  -5  18   3   35.73   10.24
  -5  18   4   16.61    7.79
  -5  18   4   23.26    9.08
  -5  18   5   26.89   11.70
  -5  18   5   25.18    9.70
  -5  18   6   34.06   13.13
  -5  18   7   30.83   12.13
 -13  -5   7   44.05   13.53
 -18  13   7   43.19   16.47
 -13  -5   8   -7.27    8.53
  -5  18   8   -7.36   11.70
 -18  13   8   -5.93    8.72
 -13  -5   9   -6.66    7.07
  -5  18   9  -12.48   13.35
 -18  13   9    1.87   11.21
 -18  13  10   13.90   12.12
  -5  18  10   -8.17   11.80
 -13  -5  10    1.04    6.68
  -5  18  11   20.56   14.61
 -18  13  11   43.28   18.64
 -13  -5  11   31.02   14.78
  -5  18  12   -4.16    8.30
 -18  13  12   -8.81   13.23
  -5  18  13   11.12   13.38
 -13  -5  13   10.50   13.57
 -18  13  13   21.86   19.51
  -5  18  14   14.31   21.32
 -13  -5  14  -13.15   12.61
 -18  13  14   23.92   19.16
  -6  18  -8    3.04    3.51
  12   6  -8    6.06    6.46
  12   6  -7   18.78   11.85
  -6  18  -7   22.45    6.50
  12   6  -6    2.61    6.79
  -6  18  -6   10.18    3.64
  -6  18  -5   14.02    4.33
  12   6  -5    6.97    7.67
  12   6  -4  -12.28    9.44
  -6  18  -4    3.29    1.82
  -6  18  -3   37.44    4.87
  12   6  -3   51.35   14.73
  -6  18  -3   35.10    4.98
  12   6  -2   66.15   16.85
  -6  18  -2   48.05    6.32
  12   6  -1    3.01    9.21
  -6  18  -1   10.11    4.07
  -6  18   0   -0.14    3.20
  -6  18   1   23.12    7.13
  -6  18   2   59.97   13.84
  -6  18   3   76.06   17.00
 -18  12   4    7.28    4.14
  -6  18   4    9.26    7.09
  -6  18   4    4.22    4.83
  -6  18   5    7.49    7.92
  -6  18   5   10.15    6.01
 -18  12   5    3.93    3.94
  -6  18   6    3.78    6.81
 -12  -6   6   26.82   10.91
 -12  -6   7   19.13    8.81
  -6  18   7   11.67    8.18
 -18  12   7   40.44   18.69
 -12  -6   8    9.22    7.30
  -6  18   8    4.44    7.40
 -18  12   8   12.63   11.25
  -6  18   9   15.45   12.50
 -18  12   9    3.52    9.45
 -12  -6   9   -4.22    7.44
 -18  12  10    2.02   12.12
  -6  18  10    5.61    7.74
 -12  -6  10   11.84   11.11
 -18  12  11   33.12   16.60
  -6  18  11   19.59   15.70
 -12  -6  11   17.76   13.17
  -6  18  12   22.18   18.57
 -12  -6  12   -0.17    8.67
 -18  12  12   -2.31   10.68
  -6  18  13   -3.71    9.70
 -12  -6  13    0.93    8.93
  -6  18  14   14.25   13.70
 -12  -6  14    1.57   12.40
 -18  12  14   35.12   23.43
  -7  18  -8   -5.10    6.39
  -7  18  -7   11.48    5.72
  11   7  -6   10.32   10.25
  -7  18  -6    6.59    4.53
  -7  18  -5   46.17    8.83
  11   7  -5   52.14   16.95
 -11  -7  -4   62.94   18.20
  -7  18  -4   48.16    8.51
  11   7  -4   77.75   19.73
  11   7  -3   39.50   14.97
  11   7  -2   18.52   10.95
  -7  18  -1   52.70    8.74
  11   7  -1   44.11   14.71
  -7  18   0   45.03    9.20
  11   7   0   34.01   10.22
  -7  18   1   40.12    9.85
  -7  18   2   14.18    7.50
  -7  18   3   33.90   10.93
  -7  18   4   62.53   13.15
 -18  11   4   53.27   10.88
  -7  18   4   74.44   17.85
  -7  18   5   66.65   18.05
  -7  18   5   61.85   13.24
  -7  18   6   17.97   10.94
 -11  -7   6   10.29    7.73
 -11  -7   7    8.17    7.15
  -7  18   7    0.43    8.10
 -18  11   7   19.50   13.64
 -11  -7   8   12.73    9.06
  -7  18   8    1.93    8.48
 -18  11   8   20.43   14.94
  -7  18   9   26.82   17.27
 -18  11   9   31.04   17.06
 -11  -7   9   28.60   13.16
 -18  11  10    3.71   11.85
  -7  18  10    0.73    7.90
 -11  -7  10    8.49    6.74
 -18  11  11    7.45   14.07
 -11  -7  11   12.29   11.07
  -7  18  11   11.51   10.52
 -18  11  12   16.43   15.68
  -7  18  12   12.92    8.95
 -11  -7  12   27.20   14.30
  -7  18  13   34.94   20.36
 -11  -7  13    8.44   11.47
 -18  11  13    8.86   11.89
  -7  18  14   -0.26   13.72
 -18  11  14   23.50   19.46
  -8  18  -8    2.33    5.24
  -8  18  -7    1.68    5.14
  -8  18  -6   48.59   10.70
  -8  18  -5   88.83   13.37
  10   8  -5  106.85   23.18
 -10  -8  -4   41.50   13.24
  10   8  -4   55.94   17.40
 -10  -8  -3   90.56   20.06
  10   8  -3   95.16   21.03
  10   8  -2   11.97    9.56
  10   8  -1   21.21    9.57
  10   8   0   -4.11    8.30
  -8  18   0    0.08    3.61
  -8  18   1    7.07    4.20
  -8  18   2   12.08    5.49
  -8  18   3   63.57   13.49
 -18  10   3   72.32   13.95
  -8  18   4   29.79   12.48
 -18  10   4   46.90   11.29
  -8  18   5   86.64   20.64
  -8  18   5   89.99   15.12
 -10  -8   6   74.55   15.06
  -8  18   6   68.66   18.42
 -10  -8   7    8.10    8.04
  -8  18   7   25.25   12.19
  -8  18   8   35.43   14.36
 -18  10   8   16.77   12.23
 -10  -8   8   19.26   10.82
 -18  10   9   -6.66    8.19
 -10  -8   9    2.47    4.96
 -18  10  10    9.70    8.76
  -8  18  10  -15.90    8.83
 -10  -8  10    5.68    7.12
 -18  10  11    9.44    8.73
  -8  18  11    2.67   12.64
 -10  -8  11    9.33   10.26
 -18  10  12  -12.15   13.93
  -8  18  12   -8.11   14.35
 -10  -8  12  -18.13   10.96
 -10  -8  13   18.09    9.64
 -18  10  13   37.95   22.90
  -8  18  14    4.99   16.75
 -18  10  14   21.78   17.32
  -9  18  -7   21.30    7.99
  -9  18  -6   19.35    7.08
  -9  18  -5   94.82   14.83
  -9  -9  -4   64.05   17.65
   9   9  -4   50.94   16.32
   9   9  -3  252.09   34.43
  -9  -9  -3  225.59   30.05
   9   9  -2  131.02   24.63
  -9  -9  -2   85.02   17.65
   9   9  -1   47.72   14.10
   9   9   0    7.34    9.59
   9   9   1   38.97   11.00
  -9  18   1   51.42   11.66
  -9  18   2  106.41   18.73
 -18   9   3  225.65   25.25
  -9  18   3  252.12   29.97
 -18   9   4   56.81   12.13
  -9  18   4   56.25   13.14
  -9  18   5   92.91   14.04
  -9  -9   5  106.01   15.77
  -9  18   5  107.41   22.39
  -9  -9   6   43.94   12.54
  -9  18   6   13.68    7.73
  -9  -9   7   20.95    8.37
  -9  18   7   45.05   17.03
  -9  18   8   15.63   11.41
 -18   9   8    8.20   10.99
  -9  -9   8   17.95    9.30
 -18   9   9   11.41   11.33
  -9  18   9   12.51   10.88
  -9  -9   9   12.23    8.43
  -9  -9  10    9.33    7.84
  -9  18  10   10.33    8.55
 -18   9  11   -2.04    9.81
  -9  -9  11    8.65   10.68
  -9  18  11  -10.71   13.41
 -18   9  12   -2.30    8.48
  -9  -9  12   -4.33    6.04
  -9  18  12   11.50   14.79
  -9  -9  13   10.91    9.58
  -9  18  13   10.41   12.64
 -18   9  13   45.59   20.86
  -9  18  14  -50.23   24.71
 -18   9  14   27.50   21.86
 -10  18  -6    6.98    5.92
  -8 -10  -5   40.74   14.93
  -8 -10  -4  -14.79   10.10
  -8 -10  -3  110.31   21.20
   8  10  -3  155.72   28.50
  -8 -10  -2   41.85   12.41
   8  10  -2   71.20   18.80
   8  10  -1   21.01   12.80
  -8 -10  -1   14.71    7.42
   8  10   0   76.50   19.21
   8  10   1    2.83    6.66
 -10  18   2   52.09   12.12
 -18   8   2   59.96   14.43
 -10  18   3  113.69   20.20
 -18   8   3   88.14   17.11
 -10  18   4   -1.51    7.80
 -18   8   4    7.21    4.35
 -10  18   5   42.69   15.17
  -8 -10   5   30.80    7.92
 -10  18   5   21.55    6.97
 -10  18   6   19.30   12.06
  -8 -10   6   -5.92    4.33
  -8 -10   7   26.71    8.89
 -10  18   7   43.25   17.12
  -8 -10   8    6.42    6.09
 -10  18   8   17.14   12.82
 -18   8   8    8.99    8.61
  -8 -10   9   24.86   11.46
 -18   8   9   31.60   16.71
 -10  18   9   33.62   17.46
 -18   8  10   -3.05   12.06
  -8 -10  10   12.68    9.61
 -10  18  10   23.77   14.83
  -8 -10  11   -5.46    7.41
 -10  18  11    1.09    9.38
 -18   8  12  -29.69   19.44
 -10  18  12   16.05   19.09
  -8 -10  12  -10.96    9.10
 -10  18  13   31.58   18.92
 -18   8  13   44.25   19.93
 -10  18  14    1.56   12.01
 -18   8  14   18.40   14.83
 -11  18  -8  -23.31   11.09
  -7 -11  -5    6.96    7.68
  -7 -11  -4   47.35   13.23
  -7 -11  -3   59.17   14.80
  -7 -11  -2   74.66   16.79
   7  11  -2   78.12   21.08
  -7 -11  -1   16.95    7.54
   7  11  -1   17.41   12.46
   7  11   0  125.52   24.04
  -7 -11   0   95.02   14.46
   7  11   1   -0.63    7.80
   7  11   2   55.38   16.08
 -18   7   2   78.89   16.89
 -11  18   2   71.92   15.43
 -18   7   3   51.82   13.04
 -11  18   3   42.99   13.19
 -18   7   4   38.87    9.71
 -11  18   4   50.12   15.24
  -7 -11   4   52.40    8.85
  -7 -11   5    1.82    3.34
 -11  18   5   -1.00    2.74
 -11  18   5    7.58    6.84
 -11  18   6   20.65   13.20
  -7 -11   6   31.64    9.24
  -7 -11   7   11.92    7.02
 -11  18   7    0.08    9.63
  -7 -11   8   -1.63    4.47
 -18   7   8   17.08   11.90
 -11  18   8   10.09   11.59
  -7 -11   9   14.28    8.74
 -18   7   9    7.82   10.44
 -11  18   9   31.54   15.72
  -7 -11  10    5.72   10.56
 -18   7  10   -9.85   11.30
 -11  18  10   22.29   16.32
 -18   7  11    4.82    7.34
  -7 -11  11    4.42    6.78
 -11  18  11    0.98   13.85
 -18   7  12  -10.71   12.02
 -11  18  12   -4.77   11.53
  -7 -11  12   10.81    9.58
 -11  18  13   23.03   17.00
 -18   7  13    7.60   12.28
 -11  18  14   11.80   17.79
 -18   7  14   27.87   22.79
 -12  18  -8    9.22    6.74
 -12  18  -7    6.73    6.10
  -6 -12  -5   20.88   11.31
  -6 -12  -4   14.95    8.11
  -6 -12  -3    6.47    6.29
  -6 -12  -2   42.97   12.83
  -6 -12  -1   14.88    7.08
   6  12  -1   42.76   18.65
  -6 -12   0   53.73   10.89
   6  12   0   78.41   20.14
 -18   6   1   19.16   10.72
  -6 -12   1    5.98    4.52
   6  12   2   65.94   18.27
 -18   6   2   50.67   14.28
 -12  18   3    6.92    7.17
 -18   6   3    3.54    4.70
  -6 -12   4    6.08    2.92
 -12  18   4    3.95    7.82
 -12  18   5   14.26    9.62
  -6 -12   5   15.11    4.47
 -12  18   6    5.20    8.88
  -6 -12   6   15.24    5.89
 -12  18   7  -19.88   13.87
  -6 -12   7   14.65    7.19
  -6 -12   8    8.84    6.05
 -18   6   8   11.31   10.04
 -12  18   8   23.80   11.79
  -6 -12   9    8.53    7.39
 -18   6   9   33.44   16.94
 -12  18   9   12.04   11.70
  -6 -12  10   18.90    9.99
 -18   6  10    9.39   10.68
 -12  18  10   13.41   12.67
  -6 -12  11    7.47   10.45
 -18   6  11    6.30    9.47
 -12  18  11   25.16   18.82
 -18   6  12  -17.62   16.22
 -12  18  12  -13.73   12.19
 -12  18  13    3.46   14.94
 -18   6  13   30.53   18.25
 -12  18  14    4.09   13.10
 -18   6  14   33.90   20.31
 -13  18  -7    8.09    5.84
  -5 -13  -5   92.26   20.27
  -5 -13  -4   33.60   12.65
  -5 -13  -3   36.54   11.82
  -5 -13  -2    3.61    4.14
  -5 -13  -1   45.01   10.51
   5  13  -1   43.89   16.52
   5  13   0   94.04   21.62
  -5 -13   0   67.26   10.78
 -18   5   0   81.74   19.13
  -5 -13   1   33.03    6.70
   5  13   1   42.83   14.58
 -18   5   1   47.93   15.27
 -18   5   2    1.50    4.85
  -5 -13   2    2.89    2.71
   5  13   3   38.21   13.49
 -18   5   3   15.76    4.45
  -5 -13   4   18.62    3.39
 -13  18   4   40.40   14.65
  -5 -13   5   49.71    7.01
 -13  18   5   92.46   22.22
  -5 -13   6    1.91    2.39
 -13  18   6   11.57    9.61
 -13  18   7    3.76    9.50
  -5 -13   7   17.17    5.66
 -13  18   8   -6.05   10.93
  -5 -13   8   14.24    7.86
 -18   5   8   19.07   13.10
  -5 -13   9    0.46    4.40
 -18   5   9    1.55    6.77
 -13  18   9   13.33   11.70
  -5 -13  10    1.37    4.78
 -18   5  10    8.30    9.83
 -13  18  10   14.91   14.15
 -18   5  11   -9.17    8.48
 -13  18  11   26.66   16.37
 -18   5  12    0.90   11.13
 -13  18  12   10.12   16.89
 -13  18  13    4.87   13.31
 -18   5  13    7.55    7.69
 -13  18  14   32.19   24.06
 -18   5  14   23.35   17.79
 -14  18  -7  100.31   22.26
  -4 -14  -5   69.00   18.92
  -4 -14  -4   95.09   19.29
  -4 -14  -3   18.54    6.63
  -4 -14  -2   65.63   11.94
  -4 -14  -1    0.13    3.92
   4  14   0   37.85   12.41
 -18   4   0   56.26   17.82
  -4 -14   0   30.52    6.73
   4  14   1    8.97    9.23
  -4 -14   1    6.96    2.99
 -18   4   1   -0.12    6.34
 -18   4   2   89.23   18.24
   4  14   2   95.10   21.23
   4  14   3   26.71   10.53
 -18   4   3   10.75    4.76
 -14  18   4  106.81   21.88
 -14  18   5   56.77   17.05
 -14  18   6    7.94    8.50
 -14  18   7   90.67   22.92
 -14  18   8   15.73   10.33
 -18   4   8   50.42   18.62
 -18   4   9   -2.71    7.20
 -14  18   9   -3.05    9.97
 -18   4  10    7.95   11.39
 -14  18  10   29.30   18.40
 -18   4  11   -1.50    7.27
 -14  18  11   21.12   18.02
 -18   4  12   -5.87    8.19
 -14  18  12    3.67   12.59
 -14  18  13   15.61   17.29
 -18   4  13   17.01   13.71
 -18   4  14   40.66   22.55
  -3 -15  -5   -8.18    9.90
  -3 -15  -4    0.95    8.03
  -3 -15  -3    9.45    7.50
  -3 -15  -2   29.88    9.42
  -3 -15  -1   44.88    9.45
   3  15   0  106.24   20.74
  -3 -15   0   85.89   10.86
   3  15   1   32.73   12.12
 -18   3   1   53.76   15.88
   3  15   2   21.81   11.69
 -18   3   2   15.25    8.18
   3  15   3   40.73   13.35
 -15  18   5   18.35   10.14
 -15  18   6   44.61   17.63
 -15  18   7   22.72   14.01
 -15  18   8   75.81   23.78
 -18   3   8   66.65   19.75
 -15  18   9   -7.13   14.28
 -18   3   9   15.23   12.21
 -18   3  10   10.63    9.57
 -15  18  10   32.97   17.77
 -18   3  11  -18.02   17.27
 -15  18  11  -12.23   12.34
 -18   3  12   -6.48   12.91
 -15  18  12    2.04   11.33
 -15  18  13   32.88   21.22
 -18   3  13   11.72   12.88
 -18   3  14   30.65   21.17
  -2 -16  -5  -17.49   12.19
  -2 -16  -4  -16.10   10.44
  -2 -16  -3    0.25    6.57
  -2 -16  -2   25.59    8.17
  -2 -16  -1   22.14    6.77
   2  16   1    9.18    6.40
   2  16   2   41.77   13.61
   2  16   3  -14.36   10.96
   2  16   4  -21.44   13.17
 -16  18   5   38.06   15.98
 -16  18   6   47.83   18.15
 -16  18   7   14.35    7.65
 -16  18   8    0.49    8.76
 -18   2   8   20.80   11.22
 -16  18   9   -8.82   10.72
 -18   2   9   10.59    9.52
 -18   2  10   29.66   16.71
 -16  18  10   11.41   13.99
 -18   2  11   -7.47    8.04
 -16  18  11   23.03   15.20
 -18   2  12    5.57   10.84
 -16  18  12   26.15   20.39
 -16  18  13    5.65   14.43
 -18   2  13   15.95   13.24
 -18   2  14   11.00   15.25
  -1 -17  -5   13.26    8.17
  -1 -17  -4   -8.87    7.48
  -1 -17  -3   59.34   13.27
  -1 -17  -2   -0.84    5.20
   1  17   1   -1.89    8.71
   1  17   2    5.20    8.66
   1  17   3   66.01   18.06
   1  17   4    3.24    7.12
 -17  18   5   39.50   17.57
 -17  18   6   11.29   12.98
 -17  18   7    7.39    8.15
 -17  18   8   35.28   14.78
 -18   1   8   23.28   12.66
 -17  18   9    6.21    7.39
 -18   1   9   21.85   14.81
 -17  18  10    3.39   11.62
 -18   1  10   18.64   13.34
 -18   1  11   19.05   13.25
 -17  18  11  -33.56   21.18
 -17  18  12   33.60   20.56
 -18   1  12    7.00    9.55
 -17  18  13   17.14   18.57
 -18   1  13   37.89   21.79
 -18   1  14   17.51   15.10
  18   0 -10    4.98    6.14
  18   0  -9    8.44    9.34
   0 -18  -5   37.10   14.51
   0 -18  -4   26.86   11.80
   0 -18  -3   19.33    9.66
   0  18   2   23.66   12.15
   0  18   3   25.56   12.24
   0  18   4    4.44    6.08
 -18  18   6   40.77   17.81
 -18  18   7   10.55   12.78
   0  18   7  -11.64   12.39
 -18  18   8   -6.17   12.77
 -18   0   8   17.44   12.13
   0  18   8   -8.80   10.40
 -18   0   9    0.49    7.82
   0  18   9  -11.78   11.08
 -18  18  10   19.12   14.55
 -18   0  10   16.37   10.60
   0  18  10   -2.02   11.29
 -18   0  11   18.75   12.95
 -18  18  11   14.63   17.21
 -18  18  12    3.45    8.68
 -18   0  12   -6.50   10.27
 -18  18  13    4.56   14.38
 -18   0  13   33.74   20.59
 -18   0  14   -0.97    9.92
  18   1 -11   25.54   11.56
  18   1 -10    7.35    7.82
  18   1  -9    4.57   10.39
  18   1  -8    8.41    9.16
   1 -19  -5   26.68   13.31
   1 -19  -4   67.96   16.74
  -1  19   2    9.32   10.54
  -1  19   3   48.23   17.96
  -1  19   4   40.37   14.29
  -1  19   5   32.71   12.55
  -1  19   5   20.74   10.85
 -19  18   6   12.66    9.37
  -1  19   6   -1.67    9.24
  -1  19   7   13.29   10.13
 -19  18   7    0.18    6.87
  -1  19   8   -8.59    7.30
 -19  18   8    7.96   11.14
 -18  -1   8   18.14   12.21
  -1  19   9   17.42   11.07
 -19  18   9   -0.13    9.13
 -18  -1   9    6.71   10.77
 -19  18  10   28.09   18.13
 -18  -1  10   20.26   14.07
  -1  19  10   13.64   15.97
 -19  18  11   12.52   12.37
 -18  -1  11    6.01    7.46
  -1  19  11   24.19   13.87
  -1  19  12   -8.08   11.37
 -19  18  12   25.00   16.55
 -18  -1  12    8.92   11.97
 -18  -1  13   32.16   19.69
 -18  -1  14    6.05    9.74
  17   2 -11  -12.55    9.20
  17   2 -10   -2.91    5.55
  17   2  -9   19.91   11.57
  17   2  -8    7.15    8.81
  17   2  -7   10.14   10.27
  17   2  -6   16.48   10.74
   2 -19  -5   54.76   15.67
  -2  19   2   25.81   13.12
  -2  19   3   67.69   15.02
  -2  19   3   83.45   20.56
  -2  19   4   78.66   17.96
  -2  19   4   53.17   14.74
  -2  19   5   57.92   16.64
  -2  19   5   43.30   13.98
  -2  19   6    6.14    8.73
 -19  17   6    7.12    7.07
  -2  19   7   22.43   14.48
 -19  17   7   15.25   10.51
  -2  19   8   -8.24    8.77
 -19  17   8    7.93    8.47
 -17  -2   8   -6.60    9.11
  -2  19   9   14.27   12.89
 -19  17   9    9.76   12.99
 -17  -2   9   -5.91    6.90
  -2  19  10   40.73   19.92
 -17  -2  10   20.15   12.70
 -19  17  10   16.17   15.28
 -17  -2  11    6.16    9.73
 -19  17  11  -21.04   18.81
  -2  19  11  -11.62   14.77
  -2  19  12  -22.35   18.84
 -17  -2  12   17.42   14.70
 -19  17  12    3.01   11.32
 -17  -2  13   48.29   21.32
 -19  17  13   43.44   21.22
  -2  19  13   20.41   15.57
 -17  -2  14   23.21   16.70
  16   3 -11    5.61    5.96
  16   3 -10   15.05    8.93
  16   3  -9    7.01   10.15
  16   3  -8   -8.06    8.69
  16   3  -7   38.89   16.31
  16   3  -6   17.62   10.02
  16   3  -5  112.75   24.60
  -3  19   2   20.31    8.38
  -3  19   3   15.23    8.51
  -3  19   3   36.73   14.30
  -3  19   4   59.08   16.79
  -3  19   4   52.50   15.42
  -3  19   5  103.95   21.77
  -3  19   5   88.78   18.38
 -19  16   5   64.45    9.63
  -3  19   6   -5.42   11.12
  -3  19   7   24.09   14.51
 -19  16   7   20.28   11.50
  -3  19   8    0.53    8.06
 -19  16   8   -9.93    8.96
 -16  -3   8    6.62    8.84
  -3  19   9   19.99    9.59
 -16  -3   9   23.10   14.96
 -19  16   9   12.12   15.54
  -3  19  10    9.74   10.58
 -16  -3  10   10.11   11.96
 -19  16  10   22.62   17.89
 -19  16  11   14.31    9.92
  -3  19  11    6.87   15.34
 -16  -3  11    6.16   10.67
  -3  19  12   -6.46   13.54
 -16  -3  12   16.62   13.89
 -19  16  12    0.27   14.51
  -3  19  13    7.80   14.31
 -16  -3  13   -2.95    6.73
 -16  -3  14    0.68   10.05
  15   4 -12   26.38   13.63
  15   4 -11   11.71    9.11
  15   4 -10   26.86   15.03
  15   4  -9    2.41    8.75
  15   4  -8   11.25    8.48
  15   4  -7   16.38   10.64
  15   4  -6   26.01   12.67
  15   4  -5   49.96   17.30
  15   4  -4   41.12   15.89
  15   4  -3   88.47   21.72
  -4  19   0   48.88    7.84
  -4  19   1   30.97    8.07
  -4  19   2    5.43    3.98
  -4  19   3   97.81   19.10
  -4  19   3   81.76   17.47
  -4  19   4   38.37   13.30
  -4  19   4   46.63   14.95
  -4  19   5   58.37   14.69
 -19  15   5   36.93    7.48
  -4  19   5   47.48   14.57
  -4  19   6   32.06   13.18
  -4  19   7  -15.44   12.73
 -15  -4   7    0.01    5.18
 -19  15   7    1.05    7.16
  -4  19   8   -1.60    6.68
 -15  -4   8   17.20   10.62
 -19  15   8   26.97   16.44
  -4  19   9   20.54   17.26
 -15  -4   9    2.97   10.04
 -19  15   9   37.55   18.44
 -15  -4  10   14.82   11.87
  -4  19  10   13.41    9.37
 -19  15  10   35.88   20.51
 -19  15  11    1.85   14.61
  -4  19  11    8.44   17.04
 -15  -4  11   -8.01   10.47
  -4  19  12  -20.46   15.04
 -15  -4  12   14.05   14.05
 -19  15  12  -18.59   14.68
  -4  19  13    3.23   10.32
 -15  -4  13   -5.83   12.25
 -19  15  13   29.82   20.48
  -4  19  14   -5.26   10.19
 -15  -4  14   23.07   16.21
  14   5 -12   15.88    7.27
  14   5 -11    7.55    8.54
  14   5 -10   -0.21    7.00
  14   5  -9    9.03   10.22
  14   5  -8    9.19    9.62
  14   5  -7   -1.31    6.83
  14   5  -6   -3.48   10.87
  14   5  -5    4.65    6.72
  14   5  -4   72.80   20.74
  14   5  -3   27.65   12.81
  14   5  -2   -0.99    8.66
  -5  19  -1    8.07    2.83
  -5  19   0  151.17   15.26
  -5  19   1   16.98    6.62
  -5  19   2    5.96    5.62
  -5  19   3    8.52    5.11
  -5  19   4   50.55   15.26
  -5  19   4   62.54   15.58
  -5  19   5    9.96    8.95
  -5  19   5   14.69    8.03
 -19  14   5    8.61    3.79
  -5  19   6    1.53    5.95
  -5  19   7   -6.03   11.88
 -14  -5   7   10.03    9.05
 -19  14   7   -0.02    6.48
  -5  19   8  -11.18    8.66
 -14  -5   8    7.17   10.04
 -19  14   8    7.83    8.27
 -14  -5   9   20.75   11.02
  -5  19   9   14.14   10.91
 -19  14   9   28.61   16.52
  -5  19  10    9.89   11.93
 -19  14  10    2.97    8.22
 -14  -5  10   15.42    8.50
 -19  14  11   -2.04   10.68
  -5  19  11   -0.09    9.63
 -14  -5  11   21.69   14.90
  -5  19  12    4.11   14.22
 -14  -5  12   21.36   15.15
 -19  14  12   -2.39   12.50
  -5  19  13   17.09   14.83
 -14  -5  13   10.27   12.18
 -19  14  13    5.96   10.76
  -5  19  14  -12.13   14.15
 -14  -5  14  -17.66   11.06
  13   6 -13   -6.41    9.00
  13   6 -12    0.63    7.14
  13   6 -11   24.03   14.30
  13   6 -10   34.26   13.98
  13   6  -9   -3.08    5.73
  13   6  -8   -2.56    9.10
  13   6  -7   -3.63    8.45
  -6  19  -7    6.93    4.34
  -6  19  -6   59.40    8.25
  13   6  -6   92.39   21.82
  13   6  -5  -14.56   13.24
  13   6  -4   49.96   15.26
  13   6  -3   29.35   12.07
  -6  19  -2   52.23    5.95
  13   6  -2   88.91   20.84
  -6  19  -1   15.97    4.94
  -6  19   0   18.52    6.77
  -6  19   1   29.48    8.80
  -6  19   2   93.53   16.21
  -6  19   3   40.79   11.87
  -6  19   4   15.63    8.34
  -6  19   4   42.94   13.35
 -19  13   4   22.60    7.50
 -19  13   5    4.55    3.95
  -6  19   5    3.28    6.41
  -6  19   5    5.57    5.68
  -6  19   6   71.47   18.39
  -6  19   7    4.39   10.16
 -13  -6   7   12.36    9.75
 -19  13   7    1.57    6.83
 -13  -6   8   16.55    8.20
  -6  19   8   14.56   12.50
 -19  13   8    9.81    9.75
 -13  -6   9   -8.98   11.46
  -6  19   9   -5.93   11.85
 -19  13   9   16.28   12.80
 -19  13  10   41.42   18.97
  -6  19  10    5.52    9.89
 -13  -6  10   25.44   11.60
 -19  13  11   17.89   14.11
  -6  19  11   -1.79   13.65
 -13  -6  11   13.50   10.82
 -19  13  12    7.38   11.41
  -6  19  12    0.64   12.38
 -13  -6  12   11.30   13.83
  -6  19  13   18.30   20.03
 -13  -6  13   20.15   14.55
 -19  13  13   12.45   14.45
  -6  19  14   16.62   15.51
  12   7  -8   -7.42    9.21
  12   7  -7   54.08   19.11
  -7  19  -7   21.30    7.01
  12   7  -6    0.31   11.65
  -7  19  -6   24.88    7.13
  -7  19  -5   18.86    5.62
  12   7  -5   20.87   11.34
  -7  19  -4    3.80    2.28
  12   7  -4   12.62    8.96
  12   7  -3   62.04   17.23
  -7  19  -2   20.61    5.13
  12   7  -2   24.59   12.14
  -7  19  -1    6.35    3.30
  12   7  -1   -7.24   10.97
  -7  19   0   73.78   11.87
  -7  19   1    6.63    5.10
  -7  19   2   28.31   10.22
  -7  19   3   52.93   12.91
 -19  12   4    1.63    3.55
  -7  19   4    9.69    6.30
  -7  19   4    7.65    4.74
  -7  19   5   26.45   12.46
  -7  19   5   28.33   10.22
  -7  19   6    8.16    8.90
 -12  -7   6   33.05   11.28
 -12  -7   7   53.74   14.33
  -7  19   7   62.89   20.12
 -12  -7   8   18.19   10.31
  -7  19   8   26.25   13.34
 -19  12   8   30.40   15.67
  -7  19   9  -11.98    8.73
 -19  12   9   -4.64    8.75
 -12  -7   9   13.22    8.50
 -19  12  10   13.47   10.21
  -7  19  10   21.68   16.01
 -12  -7  10   23.74   13.15
  -7  19  11   -2.18    9.82
 -12  -7  11    6.68    8.62
 -19  12  12  -16.36   16.54
  -7  19  12    2.19    9.66
 -12  -7  12   -1.11    7.59
  -7  19  13   -0.04   14.64
 -12  -7  13   14.02   10.48
 -19  12  13  -16.72   14.65
  -7  19  14    9.81   15.13
  -8  19  -8   25.41    9.19
  -8  19  -7   31.03    9.71
  11   8  -6    8.27    9.38
  -8  19  -6    7.73    5.02
  -8  19  -5   78.07   11.75
  11   8  -5   94.77   21.75
  -8  19  -4   -0.02    4.22
  11   8  -4   17.51    9.07
  11   8  -3   18.63   10.27
 -11  -8  -3   17.93    9.89
  11   8  -2    3.10    7.34
  -8  19  -1    1.52    3.07
  11   8  -1  -10.09   11.36
  11   8   0   -0.45    8.65
  -8  19   0   15.12    6.31
  -8  19   1    3.26    5.28
  -8  19   2   11.09    7.81
  -8  19   3    4.14    5.99
 -19  11   4    8.14    5.71
  -8  19   4   17.37    9.41
  -8  19   5  118.77   24.48
  -8  19   5   89.82   15.76
 -11  -8   6   25.69   10.07
  -8  19   6   21.90   14.64
 -11  -8   7   34.42   12.99
  -8  19   7   37.22   14.02
 -11  -8   8   11.36    7.82
  -8  19   8   11.85   13.17
 -19  11   8   19.09   12.56
  -8  19   9    6.12    9.86
 -19  11   9   22.58   15.42
 -11  -8   9   21.11   12.44
 -19  11  10    2.13    8.57
  -8  19  10  -14.69   16.73
 -11  -8  10   19.23   11.17
 -19  11  11    5.08   12.87
  -8  19  11  -17.88   14.30
 -11  -8  11    8.46    8.34
 -19  11  12  -14.76   12.91
  -8  19  12  -16.48   13.35
 -11  -8  12   -4.31    7.31
  -8  19  13   12.71   14.39
 -19  11  13   18.38   17.01
  -8  19  14    9.48   16.97
  -9  19  -7    2.02    4.02
  -9  19  -6   69.76   13.33
  -9  19  -5    0.86    3.63
  10   9  -5   -8.96   10.35
 -10  -9  -4   26.59   10.56
  10   9  -4   34.79   13.70
 -10  -9  -3   -4.99    6.51
  10   9  -3   10.65   10.22
  10   9  -2   33.67   13.57
 -10  -9  -2   20.54    8.89
  10   9  -1   62.93   15.62
  10   9   0  -20.70   14.76
  -9  19   0   10.71    6.64
  -9  19   1   73.84   14.15
  10   9   1   62.43   16.09
  -9  19   2   21.99    8.84
  -9  19   3   -0.95    6.78
 -19  10   3   12.60    6.02
 -19  10   4   32.30    9.70
  -9  19   4    4.96    7.36
  -9  19   5    7.33    5.91
  -9  19   5   13.73   11.98
 -10  -9   6   82.10   16.98
  -9  19   6  100.90   23.34
 -10  -9   7    9.09    5.80
  -9  19   7   21.08   11.24
  -9  19   8   27.01   15.13
 -19  10   8   15.19   12.64
 -10  -9   8    8.59    7.36
  -9  19   9  -15.64   11.38
 -19  10   9   -1.90    9.59
 -10  -9   9    0.28    5.57
 -19  10  10   28.24   17.56
  -9  19  10   10.57   13.77
 -10  -9  10    7.68    9.41
 -19  10  11    9.08   12.52
  -9  19  11    3.26    9.82
 -10  -9  11    6.27    7.98
 -19  10  12   -8.71   14.69
 -10  -9  12    2.35    8.66
  -9  19  12   28.81   19.54
  -9  19  13  -13.79   17.62
 -19  10  13   -5.30    8.12
  -9  19  14   -1.03   15.84
 -19  10  14   28.90   17.54
 -10  19  -7    5.10    4.91
 -10  19  -6   32.89   10.33
  -9 -10  -4    3.27    6.08
   9  10  -4   20.63    9.85
  -9 -10  -3   67.45   17.21
   9  10  -3   72.28   19.24
  -9 -10  -2   18.43    9.47
   9  10  -2   11.94   13.32
   9  10  -1   31.13   12.88
   9  10   0  -13.97   11.38
   9  10   1   13.09    8.23
 -10  19   1   26.38    9.03
 -10  19   2   16.80    6.71
 -10  19   3   47.41   13.06
 -19   9   3   63.56   14.63
 -10  19   4   12.70    8.13
 -19   9   4   15.59    7.52
 -10  19   5   14.08    4.76
  -9 -10   5   25.31    8.31
 -10  19   5   31.97   13.07
  -9 -10   6   43.75   11.81
 -10  19   6   51.09   19.36
 -10  19   7   13.93   12.06
  -9 -10   7    7.13    6.19
  -9 -10   8   18.43    8.28
 -10  19   8    3.03    6.77
 -19   9   8   22.72   16.51
  -9 -10   9  -15.50    9.95
 -19   9   9   11.74   11.54
 -10  19   9    1.92   11.18
 -19   9  10   23.28   12.39
  -9 -10  10   27.94   12.10
 -10  19  10   43.33   20.43
 -19   9  11    2.05    8.17
  -9 -10  11    7.54    5.96
 -10  19  11    8.80   10.71
 -19   9  12   -4.87   10.31
  -9 -10  12   12.26   11.75
 -10  19  12  -17.14   11.19
 -10  19  13  -11.81   13.83
 -19   9  13   12.82   16.76
 -10  19  14   -3.19   16.04
 -19   9  14   17.99   18.00
 -11  19  -8    8.48    6.76
 -11  19  -6   -4.15    3.21
  -8 -11  -4   51.36   16.73
   8  11  -3   71.24   18.22
  -8 -11  -3   78.95   17.34
  -8 -11  -2   91.20   18.17
   8  11  -2   93.62   22.81
   8  11  -1   44.53   18.42
  -8 -11  -1    3.59    4.08
   8  11   0  -16.25   12.45
   8  11   1   16.74   11.07
 -19   8   2   74.13   15.99
 -11  19   2   77.14   17.18
   8  11   2   53.28   14.77
 -11  19   3   67.43   16.34
 -19   8   3   66.59   15.19
 -11  19   4   40.84   14.54
 -19   8   4   19.96    7.63
 -11  19   5   35.18   13.08
  -8 -11   5   40.34    9.48
 -11  19   5   16.49    4.94
 -11  19   6   -7.61   12.32
  -8 -11   6    2.14    4.29
  -8 -11   7   37.53   11.40
 -11  19   7   23.21   12.90
  -8 -11   8    9.51    7.50
 -11  19   8    0.86    6.91
 -19   8   8    7.87    9.53
  -8 -11   9    9.73    8.71
 -19   8   9   24.84   16.89
 -11  19   9    9.87   13.80
  -8 -11  10   13.39    9.83
 -19   8  10   23.70   14.12
 -11  19  10   21.75   16.07
  -8 -11  11    8.51    7.25
 -19   8  11    2.53   12.58
 -11  19  11  -12.62   13.67
 -19   8  12  -17.12   15.76
 -11  19  12   -7.24   16.17
 -11  19  13   16.27   14.42
 -19   8  13   11.70   16.81
 -11  19  14   10.04   16.26
 -19   8  14   47.69   25.61
 -12  19  -8    6.77    6.28
  -7 -12  -4   20.22    9.13
  -7 -12  -3   28.45   10.79
  -7 -12  -2  354.42   34.45
   7  12  -2  412.89   45.96
  -7 -12  -1   49.46   12.25
   7  12  -1   87.18   22.88
  -7 -12   0   14.60    6.50
   7  12   0   16.23    7.62
   7  12   1   47.60   17.20
 -19   7   1   70.40   17.37
   7  12   2  346.41   41.05
 -19   7   2  369.21   37.14
 -12  19   2  344.24   34.83
 -19   7   3   35.08   12.04
 -12  19   3   46.14   15.23
  -7 -12   4   30.27    6.65
 -12  19   4   40.26   13.93
 -12  19   5    4.16    6.52
  -7 -12   5    1.47    3.79
 -12  19   6    1.46    6.55
  -7 -12   6   11.51    5.12
  -7 -12   7   94.11   15.45
 -12  19   7   73.49   20.66
  -7 -12   8   34.93    9.86
 -19   7   8   45.11   17.76
 -12  19   8   30.29   15.74
  -7 -12   9   14.68   10.02
 -19   7   9   36.26   15.49
 -12  19   9   26.25   15.10
  -7 -12  10    9.24    7.98
 -19   7  10   13.85   14.77
 -12  19  10   -0.95    8.62
 -19   7  11  -21.76   17.31
 -12  19  11   -1.26    8.37
 -19   7  12   -2.34   10.10
 -12  19  12  -29.29   21.07
 -12  19  13   31.20   22.80
 -19   7  13  -30.90   18.39
 -19   7  14   18.72   18.80
 -13  19  -7    9.82    9.57
  -6 -13  -5    1.27    7.35
  -6 -13  -4   21.47   10.09
  -6 -13  -3   32.60   11.77
  -6 -13  -2  297.81   30.47
   6  13  -2  370.82   43.73
  -6 -13  -1  258.54   25.64
   6  13  -1  300.36   38.94
  -6 -13   0    3.95    4.30
   6  13   0   25.14   11.77
 -19   6   1  257.60   32.84
   6  13   1  247.42   34.72
  -6 -13   1  234.49   19.48
 -19   6   2  317.61   36.39
   6  13   2  338.25   39.75
  -6 -13   2  233.63   17.38
  -6 -13   3   20.37    4.53
 -13  19   3   45.18   15.01
 -19   6   3   21.81    8.46
 -13  19   4   21.75   10.28
  -6 -13   4    8.18    3.12
 -13  19   5   22.22   10.49
  -6 -13   5    4.42    3.20
 -13  19   6  -14.48   13.08
  -6 -13   6   -0.03    2.72
 -13  19   7   20.11   11.53
  -6 -13   7    7.59    4.01
 -13  19   8    8.92   10.59
  -6 -13   8    3.62    5.18
 -19   6   8   27.11   13.95
  -6 -13   9    0.62    6.23
 -19   6   9   18.83   13.81
 -13  19   9   29.82   18.44
  -6 -13  10    3.54    7.23
 -19   6  10    9.12   11.29
 -13  19  10    3.24    7.58
 -19   6  11    9.41   12.89
 -13  19  11   28.04   18.30
 -19   6  12  -21.98   18.42
 -13  19  12   17.57   21.38
 -13  19  13  -17.75    9.86
 -19   6  13    0.61   11.56
 -19   6  14    8.20   14.71
 -14  19  -7   18.58   10.90
  -5 -14  -5   12.28    5.75
  -5 -14  -4   37.13   12.71
  -5 -14  -3   20.73    7.53
  -5 -14  -2   55.42   13.04
   5  14  -1  109.08   25.89
  -5 -14  -1   83.28   14.25
   5  14   0   52.04   14.60
  -5 -14   0   60.45   10.33
  -5 -14   1   65.31    8.95
   5  14   1   97.95   22.81
 -19   5   1   95.74   20.77
 -19   5   2   64.28   17.81
   5  14   2   78.86   20.94
   5  14   3   18.55    9.91
 -19   5   3    5.08    6.14
 -14  19   4   23.88   11.43
 -14  19   5   15.41   13.36
 -14  19   6    1.57    7.67
  -5 -14   6    1.74    2.04
 -14  19   7   18.33   11.15
  -5 -14   7   28.36    7.74
 -19   5   8   -2.37    5.92
  -5 -14   8   17.35    6.17
 -19   5   9   11.11   10.11
 -14  19   9    2.98    9.02
  -5 -14   9    3.57    3.86
 -19   5  10   18.62   14.10
 -14  19  10   -6.83    9.90
 -19   5  11    8.80    8.66
 -14  19  11   -1.82   10.28
 -19   5  12  -14.28   16.14
 -14  19  12   21.66   20.33
 -14  19  13   -5.75    8.63
 -19   5  13  -17.98   13.00
 -19   5  14   20.09   16.05
  -4 -15  -5   -6.86    7.72
  -4 -15  -4   -5.33    5.66
  -4 -15  -3   10.65    6.83
  -4 -15  -2   65.04   13.34
  -4 -15  -1  129.23   16.66
  -4 -15   0    6.99    3.73
   4  15   0   10.67    8.60
  -4 -15   1   61.30    6.95
   4  15   1  145.93   26.70
 -19   4   2   86.39   20.26
   4  15   2   70.03   20.24
   4  15   3   18.41   10.98
 -19   4   3    0.83    6.87
 -15  19   4   -0.54    7.71
 -15  19   5   22.18   12.18
 -15  19   6   43.29   18.24
 -15  19   7  -11.47   10.40
 -15  19   8    7.15   10.77
 -19   4   8   47.50   18.02
 -19   4   9   15.89   12.93
 -15  19   9   -7.46   12.41
 -19   4  10   15.29    9.87
 -15  19  10   51.27   23.23
 -19   4  11   26.61   15.39
 -15  19  11   20.73   17.32
 -19   4  12   -8.38   12.20
 -15  19  12   13.52   15.22
 -15  19  13    7.99   15.70
 -19   4  13   11.75   14.31
 -19   4  14   24.43   19.17
  -3 -16  -5  -11.82   12.63
  -3 -16  -4    0.61    6.30
  -3 -16  -3   52.63   14.26
  -3 -16  -2   59.38   13.00
  -3 -16  -1    0.79    3.91
  -3 -16   0    7.55    3.60
   3  16   0    9.07   10.24
   3  16   1    1.80    6.24
   3  16   2   66.37   19.69
   3  16   3   61.18   17.94
   3  16   4  -17.71   12.88
 -16  19   5   18.29   11.03
 -16  19   6   23.48   11.91
 -16  19   7   10.50   12.02
 -16  19   8    6.51   12.52
 -19   3   8    8.91   10.89
 -16  19   9    7.93   11.85
 -19   3   9   17.33   13.12
 -19   3  10   11.97    9.33
 -16  19  10   24.75   18.95
 -19   3  11    7.29    7.99
 -16  19  11   18.11   13.18
 -19   3  12  -22.03   17.21
 -16  19  12   12.19   17.07
 -16  19  13   30.92   18.92
 -19   3  13   18.57   17.63
 -19   3  14  -12.05   11.77
  -2 -17  -5   12.09   10.01
  -2 -17  -4    6.36    5.81
  -2 -17  -3   12.44    6.06
  -2 -17  -2   28.47    7.38
  -2 -17  -1    9.32    4.28
   2  17   1   34.87   14.27
   2  17   2   45.26   16.22
   2  17   3   19.95   13.64
   2  17   4    2.92    8.09
 -17  19   5   76.15   22.26
 -17  19   6   25.68   13.78
 -17  19   7   -4.79    9.76
 -17  19   8   -4.00    9.64
 -19   2   8   34.82   16.36
 -17  19   9   -8.02    8.28
 -19   2   9    8.99   10.44
 -17  19  10   -6.31   10.58
 -19   2  10   33.80   17.27
 -19   2  11    9.55   15.86
 -17  19  11   10.81   14.30
 -19   2  12   -3.02   13.92
 -17  19  12   38.33   22.42
 -17  19  13  -10.80   12.16
 -19   2  13   20.23   17.63
 -19   2  14   26.16   14.86
  -1 -18  -5   64.94   18.50
  -1 -18  -4   84.67   18.06
  -1 -18  -3   10.47    7.08
  -1 -18  -2   78.92   13.92
   1  18   1   16.13   11.63
   1  18   2   85.42   21.31
   1  18   3   13.17   11.46
   1  18   4   77.85   20.30
 -18  19   5   85.13   23.21
 -18  19   6   28.89   16.02
 -18  19   7   -3.22    9.42
 -18  19   8   29.53   16.99
 -19   1   8    2.57    7.80
 -18  19   9   32.57   18.82
 -19   1   9   17.73   11.60
 -18  19  10    8.20   12.79
 -19   1  10    7.30    9.15
 -19   1  11   -4.21    9.38
 -18  19  11  -19.10   15.62
 -19   1  12  -12.11   14.96
 -18  19  12   10.98   14.16
 -18  19  13   27.89   16.93
 -19   1  13   -6.85   10.14
 -19   1  14   11.17   16.70
   0 -19  -5    8.78    9.47
   0 -19  -4   36.70   12.70
   0 -19  -3  137.37   19.84
   0  19   1    0.86    8.75
   0  19   2   94.56   22.16
   0  19   3  154.80   27.96
   0  19   4   31.32   13.79
 -19  19   6   50.42   19.52
 -19  19   7    4.42    8.08
 -19  19   8   13.24   14.48
 -19   0   8   -0.71    6.26
 -19  19   9    3.32    7.66
 -19   0   9    4.40    8.45
 -19  19  10   10.46   14.77
 -19   0  10   -4.75    8.54
 -19   0  11   13.06   11.90
 -19  19  11    4.00    9.19
 -19  19  12   48.01   24.59
 -19   0  12   -4.21   12.32
 -19   0  13    4.82    9.90
 -19   0  14   22.09   15.90
   1 -20  -5   13.65   10.55
  -1  20   2   48.82   17.66
  -1  20   3    3.52    5.92
  -1  20   4    7.36    6.67
  -1  20   5    8.80    9.20
 -20  19   6   17.52   12.78
 -20  19   7    2.86    8.82
  -1  20   7   -2.59    8.49
 -20  19   8  -12.95   15.47
 -19  -1   8    1.21    7.41
  -1  20   8   -0.36    6.93
 -20  19   9    1.19   10.11
 -19  -1   9    4.86   11.28
  -1  20   9    3.16   10.48
 -20  19  10   16.24   15.87
  -1  20  10  -19.02   19.53
 -19  -1  10   23.19   16.25
 -19  -1  11    6.80    8.58
 -20  19  11    0.89   10.63
 -20  19  12   38.16   23.04
 -19  -1  12    7.24   13.33
 -19  -1  13   16.46   15.78
 -19  -1  14   31.75   18.96
  18   2 -11    1.07   11.53
  18   2 -10   -7.66    6.23
  18   2  -9   -3.63    9.73
  18   2  -8    9.49    7.84
  18   2  -7    5.01    7.87
  -2  20   2   73.15   19.76
  -2  20   3   40.15   15.53
  -2  20   4   65.86   17.75
  -2  20   4   83.63   18.67
  -2  20   5   -3.06    5.83
  -2  20   5   -5.72    5.89
  -2  20   6   -2.30    9.68
 -20  18   6   16.11   11.63
  -2  20   7    7.66    9.92
 -20  18   7   19.07   11.01
  -2  20   8  -14.40    9.84
 -20  18   8    0.60    7.35
  -2  20   9    1.96    7.81
 -20  18   9  -18.06   15.42
 -18  -2   9   -0.57    7.85
  -2  20  10   -7.56   10.55
 -18  -2  10   -1.82   10.45
 -18  -2  11    8.96   10.13
 -20  18  11  -21.53   19.57
  -2  20  11  -21.58   15.68
 -18  -2  12  -14.23    9.52
 -20  18  12  -38.90   21.91
  -2  20  12  -10.80   16.02
 -18  -2  13   21.24   15.36
  -2  20  13    7.77   16.27
 -18  -2  14    1.67    7.74
  17   3 -11    7.33   11.06
  17   3 -10   -7.10    9.78
  17   3  -9   -8.06   11.43
  17   3  -8    5.70    8.50
  17   3  -7    3.68    9.19
  17   3  -6   52.98   19.33
  -3  20   2    9.16    6.16
  -3  20   3    3.20    5.26
  -3  20   3   13.77    9.81
  -3  20   4   45.02   14.58
  -3  20   4   42.84   13.80
  -3  20   5   18.86   10.77
  -3  20   5   25.33   11.94
 -20  17   5   13.82    5.43
  -3  20   6   37.23   15.66
  -3  20   7    1.63    8.38
 -20  17   7    9.16   10.21
  -3  20   8    4.24    6.86
 -20  17   8  -15.74   13.81
 -17  -3   8   -6.68    7.45
 -17  -3   9   21.78   15.25
 -20  17   9   17.03   15.28
  -3  20   9    6.93   10.46
  -3  20  10   -9.89   14.77
 -17  -3  10   13.19   13.14
 -20  17  10   15.01   13.13
 -17  -3  11    4.13   11.38
  -3  20  11   -4.84    9.04
 -20  17  11  -13.11   15.66
  -3  20  12   -8.01   15.23
 -17  -3  12   17.58    9.23
 -20  17  12   -2.64   10.23
  -3  20  13    1.81   15.08
 -17  -3  13   18.53   15.17
 -17  -3  14   -2.15   11.36
  16   4 -11   24.40   15.69
  16   4 -10  -17.24   11.91
  16   4  -9   18.39   11.25
  16   4  -8    6.68    6.76
  16   4  -7    5.48    5.86
  16   4  -6    1.27    7.34
  16   4  -5   14.61   11.99
  16   4  -4   27.20   14.66
  -4  20   1   20.29    7.41
  -4  20   2   18.52    8.67
  -4  20   3   35.66   13.33
  -4  20   3   27.91   11.24
  -4  20   4   17.94    9.09
  -4  20   4   20.29   10.56
 -20  16   5    3.89    4.22
  -4  20   5   17.13    9.97
  -4  20   6    5.63    8.26
  -4  20   7    1.19    6.13
 -20  16   7    6.24    6.63
 -16  -4   7   12.63    9.97
  -4  20   8    1.27    9.92
 -16  -4   8    9.81   10.34
 -20  16   8   -2.93    8.63
  -4  20   9   14.13   14.46
 -16  -4   9    1.15    8.38
 -20  16   9   22.42   16.62
 -16  -4  10   10.64   10.57
 -20  16  10   -8.91   12.94
  -4  20  10   -8.86   12.58
  -4  20  11   30.98   18.83
 -20  16  11   10.98   14.05
 -16  -4  11   24.27   14.39
 -20  16  12   10.00   13.95
  -4  20  12  -12.58   18.79
 -16  -4  12   33.58   17.68
  -4  20  13    0.02   12.15
 -16  -4  13   23.85   16.22
 -20  16  13   -0.81    9.71
  15   5 -12    7.48    7.17
  15   5 -11   14.76   13.05
  15   5 -10   25.57   14.25
  15   5  -9   34.53   16.77
  15   5  -8   16.00   13.88
  15   5  -7   -0.34    7.36
  15   5  -6    6.57    8.27
  15   5  -5   85.31   22.53
  15   5  -4   57.22   18.79
  15   5  -3   58.30   21.08
  -5  20   0    3.58    4.68
  -5  20   1   14.48    4.56
  -5  20   2  118.85   18.47
  -5  20   3   53.28   14.67
  -5  20   3   35.77   13.11
  -5  20   4   49.28   14.09
  -5  20   4   63.47   15.58
  -5  20   5   57.78   17.03
  -5  20   5   65.58   15.93
 -20  15   5   67.70   11.05
  -5  20   6    4.67    7.87
  -5  20   7   11.02    7.40
 -15  -5   7    8.58    9.56
 -20  15   7   -1.83    8.48
  -5  20   8  -12.58   14.07
 -15  -5   8    7.04    8.33
 -20  15   8    1.81    6.81
 -15  -5   9   28.32   14.67
  -5  20   9   -0.81    8.43
 -20  15   9   17.35   14.39
 -15  -5  10   -3.45    6.29
  -5  20  10    2.35   11.48
 -20  15  10    9.27   12.49
 -20  15  11    1.67    8.47
  -5  20  11    7.28    9.35
 -15  -5  11    6.93    7.77
 -20  15  12  -14.41   12.87
  -5  20  12    2.53    9.70
 -15  -5  12   11.08   13.17
  -5  20  13   11.01   13.77
 -15  -5  13   24.21   15.57
 -20  15  13   42.34   22.43
  14   6 -12    8.07   11.29
  14   6 -11    6.54    7.92
  14   6 -10   -3.85    9.19
  14   6  -9   22.47   13.44
  14   6  -8   30.30   13.39
  14   6  -7   16.06    9.92
  14   6  -6    3.50    8.10
  14   6  -5   21.52   11.96
  14   6  -4   -5.01    7.12
  14   6  -3    2.51    7.04
  14   6  -2    0.10    7.86
  -6  20  -1   42.43    6.88
  -6  20   0   81.14   12.00
  -6  20   1   71.70   13.76
  -6  20   2    0.39    4.83
  -6  20   3   -1.12    5.13
  -6  20   4   15.82   11.20
  -6  20   4   -5.02    7.28
 -20  14   4    4.66    5.11
 -20  14   5   13.81    6.09
  -6  20   5   15.60    8.93
  -6  20   5   29.20   10.31
  -6  20   6    3.97    8.43
  -6  20   7   20.22   12.31
 -14  -6   7   28.57   12.31
 -20  14   7   14.04    8.84
 -14  -6   8   23.24   11.86
  -6  20   8   23.93   15.75
 -20  14   8   13.53   13.95
 -14  -6   9    7.00    9.29
  -6  20   9   -3.12   10.30
 -20  14   9   17.40   14.02
  -6  20  10   -1.97    7.62
 -20  14  10    5.25   10.74
 -14  -6  10  -17.43   14.00
 -20  14  11   28.56   15.75
  -6  20  11   11.90   12.39
 -14  -6  11   23.07   12.75
  -6  20  12   10.37    8.87
 -14  -6  12    9.74   10.47
 -20  14  12   18.14   15.80
  -6  20  13   21.16   17.87
 -14  -6  13   17.72   13.99
 -20  14  13   32.79   19.09
  13   7 -13    3.28    6.74
  13   7 -12   18.57   16.00
  13   7 -11  -14.17   12.62
  13   7 -10   13.63   11.76
  13   7  -9   12.98   11.76
  13   7  -8  -20.87   13.61
  13   7  -7   -6.09   10.13
  13   7  -6   -4.24   10.68
  -7  20  -6    6.27    3.34
  13   7  -5   -1.27   10.35
  -7  20  -5    5.54    2.59
  13   7  -4   29.90   12.78
  -7  20  -3   76.71    7.00
  -7  20  -3   73.99    7.12
  13   7  -2    2.05    6.82
  -7  20  -2   -4.88    2.80
  -7  20  -1   99.78   11.79
  13   7  -1  101.72   21.33
  -7  20   0   34.62    8.17
  -7  20   1  118.29   17.21
  -7  20   2    0.45    4.44
  -7  20   3  158.67   24.08
  -7  20   4   65.07   16.96
  -7  20   4   47.93   12.14
 -20  13   4   45.57   10.92
  -7  20   5   18.36   11.12
 -20  13   5    6.47    3.00
  -7  20   5   12.14    7.23
  -7  20   6    4.38    6.56
  -7  20   7   13.51   11.46
 -13  -7   7   10.43    9.38
 -13  -7   8   -0.27    5.55
  -7  20   8   -5.16    9.73
 -20  13   8    6.99   13.18
 -13  -7   9   -0.38    6.67
 -20  13   9   22.22   16.32
  -7  20  10   14.55    9.82
 -20  13  10    3.24    9.48
 -13  -7  10   11.86    8.67
 -20  13  11   26.91   17.67
  -7  20  11    9.81   10.75
 -13  -7  11   10.78   11.69
 -20  13  12  -14.90   15.06
  -7  20  12  -14.18   19.88
 -13  -7  12   14.01   11.19
  -7  20  13   18.84   20.65
 -20  13  13  -10.66   12.73
  12   8  -8  -19.40   13.26
  12   8  -7   10.07    9.15
  -8  20  -7   17.23    7.08
  -8  20  -6    5.49    4.85
  12   8  -6    2.06    9.16
  -8  20  -5   10.12    4.57
  12   8  -5  -11.06   14.36
  -8  20  -4    0.91    2.61
  12   8  -4  -12.38   13.29
  12   8  -3   58.51   19.37
 -12  -8  -3   73.59   19.39
  -8  20  -2   53.40    8.02
  12   8  -2   59.63   17.79
  12   8  -1  125.67   24.76
  -8  20  -1  134.84   15.30
  -8  20   0   40.96    9.60
  -8  20   1  129.92   18.80
  -8  20   2   60.61   14.05
  -8  20   3   58.11   15.62
 -20  12   4    6.99    5.74
  -8  20   4   12.92    8.63
  -8  20   5   21.20   11.54
  -8  20   5   13.32    8.66
  -8  20   6   10.93    9.12
 -12  -8   6   10.71    8.64
  -8  20   7   24.83   13.89
 -12  -8   7   20.67    9.29
  -8  20   8   14.19   10.14
 -20  12   8   13.92   11.82
 -12  -8   8    5.06    8.61
  -8  20   9  -11.38   14.36
 -20  12   9   11.58   11.36
 -12  -8   9   17.18   11.36
 -20  12  10   11.01    7.51
 -12  -8  10   14.22   11.52
 -20  12  11   28.18   17.91
  -8  20  11   -4.13   10.06
 -12  -8  11    6.51   11.45
 -20  12  12    5.36   12.72
 -12  -8  12   -1.19    8.03
  -8  20  13    7.63   10.30
 -20  12  13    8.27   17.30
  -9  20  -7   -3.19    4.82
  11   9  -7    7.41    7.68
  -9  20  -6   23.23    7.68
  11   9  -6    7.09    6.36
  -9  20  -5    0.76    4.52
  11   9  -5    5.52    6.33
  11   9  -4    9.76    7.45
 -11  -9  -3   57.42   15.92
  11   9  -3   66.84   20.23
  11   9  -2  112.31   25.17
  11   9  -1   -6.54   12.88
  -9  20  -1   15.92    5.83
  11   9   0   -4.11   11.03
  -9  20   0    0.21    3.96
  -9  20   1    7.42    5.41
  -9  20   2   90.42   16.87
  -9  20   3   52.36   14.37
 -20  11   3   35.69   11.51
  -9  20   4   26.78   11.42
 -20  11   4   29.07    9.80
  -9  20   5    8.20    5.39
  -9  20   5   19.69   12.36
 -11  -9   6   33.86   10.39
  -9  20   6   48.37   18.29
  -9  20   6   25.62    7.90
 -11  -9   7   -2.95    6.55
  -9  20   7   11.72   12.68
  -9  20   8   23.82   14.16
 -20  11   8   23.50   15.46
 -11  -9   8   10.02    8.33
  -9  20   9    1.10    9.68
 -20  11   9   -4.72    7.52
 -11  -9   9   10.99    9.43
 -20  11  10   24.77   16.46
  -9  20  10   18.14   13.06
 -11  -9  10   12.78    9.43
 -20  11  11   -1.45   11.39
  -9  20  11   13.12   13.14
 -11  -9  11   -0.57    7.09
 -20  11  12  -19.04   14.58
  -9  20  12   10.45   11.44
  -9  20  13  -10.62   14.73
 -20  11  13   -9.17   11.37
 -10  20  -7   11.65    6.51
 -10  20  -6    9.31    5.07
  10  10  -5   -1.40   10.10
 -10  20  -5    7.89    3.69
 -10 -10  -4    9.52    7.25
  10  10  -4   -5.56    9.02
 -10 -10  -3    6.13    5.53
  10  10  -3  -10.73    9.57
  10  10  -2  138.14   26.84
 -10 -10  -2  152.04   24.93
  10  10  -1   25.56   11.00
  10  10   0  -20.68   13.65
 -10  20   0    9.55    5.59
  10  10   1   43.69   11.92
 -10  20   1   54.79   12.77
 -10  20   2  132.38   21.50
 -10  20   3   -6.80    8.53
 -20  10   3    0.36    5.46
 -10  20   4    4.49    7.11
 -20  10   4    6.17    5.47
 -10  20   5   17.42    6.57
 -10 -10   5   25.08    8.06
 -10  20   5   10.19    6.81
 -10 -10   6   15.53    8.11
 -10  20   6   13.56    8.49
 -10  20   6    9.55    5.70
 -10  20   7   22.20   13.29
 -10 -10   7  -10.47    8.56
 -10  20   8   33.59   14.82
 -10 -10   8   42.28   13.52
 -20  10   8   59.08   21.14
 -10  20   9   -9.25   11.46
 -20  10   9    2.08    7.21
 -10 -10   9    5.27    7.36
 -20  10  10   55.10   22.85
 -10 -10  10   21.60   12.27
 -10  20  10   36.15   18.41
 -20  10  11   -7.37   10.95
 -10 -10  11    1.67    6.07
 -10  20  11   -5.72   12.10
 -20  10  12   -7.01    9.40
 -10  20  12   -3.08   12.11
 -10  20  13  -11.72   16.64
 -20  10  13   15.93   11.31
 -11  20  -6    7.86    5.92
  -9 -11  -4   54.98   17.48
   9  11  -4   53.39   17.88
  -9 -11  -3    8.84    6.16
   9  11  -3    5.04   10.21
  -9 -11  -2   45.35   13.39
   9  11  -2   69.26   20.50
   9  11  -1   13.71   12.15
  -9 -11  -1  -17.46   10.07
   9  11   0   -2.35    8.48
   9  11   1   -3.05   11.48
 -11  20   1   16.42    8.44
 -11  20   2   45.99   13.23
 -20   9   2   30.67   10.41
 -11  20   3    5.52    5.81
 -20   9   3    8.49    6.20
 -20   9   4   55.38   13.03
 -11  20   4   54.82   14.28
  -9 -11   5    1.01    4.52
 -11  20   5    4.66    3.34
  -9 -11   6   19.21    7.24
 -11  20   6   12.15    4.79
 -11  20   6   -1.35    8.25
  -9 -11   7    3.64    4.33
 -11  20   7   25.20   15.19
  -9 -11   8   11.96    7.49
 -11  20   8   35.15   16.56
 -20   9   8    7.90    8.90
  -9 -11   9   25.45   11.52
 -20   9   9   29.05   14.77
 -11  20   9   17.05   12.82
  -9 -11  10   12.93    9.36
 -20   9  10   35.70   19.11
 -11  20  10   27.31   13.91
 -20   9  11   29.74   16.74
 -11  20  11  -10.40   11.46
 -20   9  12    9.29   15.43
 -11  20  12  -21.70   17.23
 -11  20  13    4.22    9.41
 -20   9  13    8.18   12.66
  -8 -12  -4    1.38    4.92
   8  12  -3   33.52   14.91
  -8 -12  -3    4.91    5.94
  -8 -12  -2   36.48   13.24
   8  12  -2   29.80   15.90
  -8 -12  -1   52.36   12.14
   8  12  -1   80.32   21.22
  -8 -12   0   -0.76    5.80
   8  12   0   14.58   10.85
   8  12   1   45.49   14.63
 -20   8   2   41.53   13.84
 -12  20   2   40.04   13.48
   8  12   2   16.93    6.15
 -20   8   3   16.29    8.35
 -12  20   3   22.23    7.97
 -12  20   4   -3.58    5.84
  -8 -12   4    5.42    3.68
 -20   8   4   13.53    7.17
  -8 -12   5    4.12    3.87
 -12  20   5  -15.62   11.67
 -12  20   6   14.40    8.08
  -8 -12   6   28.82    8.30
 -12  20   6   19.46    6.25
  -8 -12   7    0.01    4.67
 -12  20   7   -9.03    9.54
  -8 -12   8    2.36    5.31
 -12  20   8   -7.04    6.58
 -20   8   8   -2.32    6.17
  -8 -12   9   17.16    8.74
 -20   8   9   29.54   16.91
 -12  20   9   30.52   16.13
  -8 -12  10   11.17    8.26
 -20   8  10   33.44   17.64
 -12  20  10   20.30   15.22
 -20   8  11    5.57   10.93
 -12  20  11   14.64   14.32
 -20   8  12   -4.61    8.51
 -12  20  12    9.59    8.58
 -12  20  13   23.26   18.43
 -20   8  13  -12.86   15.00
 -13  20  -7   10.20    9.59
  -7 -13  -4   20.30    7.71
  -7 -13  -3   27.68   11.82
  -7 -13  -2   54.34   13.32
   7  13  -2   45.68   17.66
   7  13  -1   67.55   20.26
  -7 -13  -1   41.72    9.33
  -7 -13   0    4.67    5.22
   7  13   0   30.62   12.95
  -7 -13   1   46.12    9.38
 -20   7   1   41.45   14.60
   7  13   1   52.33   16.39
   7  13   2   44.11   13.56
 -20   7   2   51.44   15.56
 -20   7   3   52.63   14.52
 -13  20   3   46.86   13.21
  -7 -13   4   21.48    5.74
 -13  20   4   22.00   11.17
 -13  20   5   13.80    9.32
  -7 -13   5   26.20    6.85
 -13  20   6   -5.20   10.90
  -7 -13   6    5.48    4.49
 -13  20   6   -1.25    2.02
 -13  20   7  -11.28   12.50
  -7 -13   7    3.71    5.13
  -7 -13   8   -0.42    4.35
 -20   7   8    9.01   12.50
 -13  20   8    4.39    6.55
  -7 -13   9    2.12    4.23
 -20   7   9    0.28    9.52
 -13  20   9   20.32   16.47
 -20   7  10   21.70   12.55
 -13  20  10   28.75   18.57
 -20   7  11   -7.76   11.93
 -13  20  11    1.47    9.81
 -20   7  12   -3.78   13.77
 -13  20  12  -15.33   17.79
 -13  20  13   12.86   14.00
 -20   7  13   -2.52    8.24
 -20   7  14   -6.88   10.72
 -14  20  -7    7.27    7.31
  -6 -14  -4   11.90    9.14
  -6 -14  -3    3.40    6.53
  -6 -14  -2  154.02   22.30
   6  14  -2  201.39   33.91
  -6 -14  -1   45.22   11.44
   6  14  -1   66.27   22.09
  -6 -14   0   37.02    7.85
   6  14   0   54.94   17.80
  -6 -14   1   24.82    6.04
   6  14   1   38.13   14.86
  -6 -14   2   90.45    9.67
 -20   6   2  158.39   26.28
   6  14   2  141.34   27.67
  -6 -14   3    6.16    1.96
  -6 -14   3    5.05    1.87
 -20   6   3   13.99    9.30
 -14  20   3   20.63   11.59
   6  14   3   12.19    7.66
 -14  20   4    9.75    7.56
  -6 -14   5    2.75    1.37
 -14  20   5   10.32    6.16
  -6 -14   6   25.58    5.72
 -14  20   6   13.56    4.34
 -14  20   7   -7.46    9.13
  -6 -14   7   10.25    5.46
  -6 -14   8   -0.60    4.08
 -20   6   8   11.35   12.26
 -14  20   8   -9.90   13.53
 -20   6   9   22.77   18.31
 -14  20   9   -7.36   12.36
 -20   6  10   30.60   18.82
 -14  20  10   16.39   15.28
 -20   6  11    2.36   12.57
 -14  20  11   21.52   18.29
 -20   6  12   11.06   13.55
 -14  20  12   38.76   23.07
 -20   6  13  -24.76   19.18
 -14  20  13   19.06   16.70
 -20   6  14    4.99   13.93
  -5 -15  -4   26.53    9.20
  -5 -15  -3    1.92    5.73
  -5 -15  -2   18.72    8.67
  -5 -15  -1  109.46   16.89
   5  15  -1  148.12   29.83
   5  15   0   86.96   22.37
  -5 -15   0   66.92   11.27
  -5 -15   1   67.48    8.51
   5  15   1   93.82   22.65
   5  15   2   24.60   13.16
 -20   5   3    2.22    6.17
   5  15   3   -5.57    9.36
 -15  20   4   31.30   13.56
 -15  20   5   22.08   11.70
 -15  20   6   30.23   14.78
 -15  20   6   12.22    3.42
 -15  20   7    7.40   10.53
 -15  20   8   17.77   13.07
 -20   5   8   31.85   15.29
 -20   5   9   11.37   10.78
 -15  20   9  -16.36   15.19
 -20   5  10   19.36   16.28
 -15  20  10   44.45   21.60
 -20   5  11   20.16   15.46
 -15  20  11   18.63   17.90
 -20   5  12  -12.44   15.55
 -15  20  12   31.36   21.83
 -15  20  13    9.17   13.53
 -20   5  13    7.56    9.31
 -20   5  14   19.02   14.33
  -4 -16  -5    1.81    5.94
  -4 -16  -4   -2.48    6.28
  -4 -16  -3   15.38    7.47
  -4 -16  -2   30.25   10.50
  -4 -16  -1  153.45   18.68
   4  16  -1  193.77   33.08
   4  16   0  263.95   37.60
  -4 -16   0  177.53   16.04
   4  16   1  199.26   33.01
   4  16   2   23.53   10.40
   4  16   3   32.54   13.94
 -16  20   4   36.68   15.30
 -16  20   5   14.49   10.62
 -16  20   6   32.01   15.95
 -16  20   7   18.71    9.58
 -16  20   8    4.82    7.55
 -20   4   8    7.89    8.02
 -16  20   9   -3.19   10.89
 -20   4   9   20.61   12.44
 -20   4  10   20.36   15.52
 -16  20  10   17.28   18.12
 -20   4  11   17.33   13.94
 -16  20  11   39.10   21.50
 -20   4  12   -2.94   10.97
 -16  20  12   18.77   14.64
 -16  20  13   26.73   19.18
 -20   4  13   23.63   17.57
 -20   4  14   28.75   19.14
  -3 -17  -5  -15.00   11.26
  -3 -17  -4  -12.87   11.10
  -3 -17  -3    0.35    6.64
  -3 -17  -2    1.87    4.93
  -3 -17  -1   55.05   10.83
  -3 -17   0    1.43    2.49
   3  17   0   12.19   12.30
   3  17   1   67.89   20.06
   3  17   2   14.49   11.70
   3  17   3   17.96   11.95
   3  17   4   17.60   10.37
 -17  20   5    4.91   10.49
 -17  20   6    5.05    9.45
 -17  20   7    8.38    6.82
 -17  20   8   25.73   15.73
 -20   3   8   23.27   12.89
 -17  20   9    1.02   13.13
 -20   3   9    4.56   10.07
 -20   3  10    3.62    9.05
 -17  20  10   -0.57   12.39
 -20   3  11  -11.99   10.58
 -17  20  11   61.01   25.97
 -20   3  12   -9.82   13.45
 -17  20  12   47.39   25.34
 -17  20  13   26.07   18.17
 -20   3  13   21.38   20.02
 -20   3  14   14.98   10.87
  -2 -18  -5    0.37    6.44
  -2 -18  -4   22.63    8.23
  -2 -18  -3   18.97    6.71
  -2 -18  -2   10.19    5.34
   2  18   0   22.89   12.23
   2  18   1   75.55   20.28
   2  18   2   20.71   13.80
   2  18   3   31.69   12.67
   2  18   4   13.26   10.52
 -18  20   5    8.59    9.92
 -18  20   6   25.74   16.34
 -18  20   7   -2.10    8.63
 -18  20   8   -6.94   15.63
 -20   2   8   10.12    8.31
 -18  20   9   -7.77   10.08
 -20   2   9   11.87   12.17
 -20   2  10    3.72    9.80
 -18  20  10  -13.04   14.98
 -20   2  11   60.22   23.08
 -18  20  11   49.15   24.02
 -20   2  12    8.01    9.13
 -18  20  12   19.03   14.51
 -20   2  13    8.46   12.27
 -20   2  14   24.44   20.10
  -1 -19  -5   41.63   14.45
  -1 -19  -4   46.92   13.28
  -1 -19  -3   18.51    8.01
   1  19   1   -1.38    7.82
   1  19   2    5.02    6.65
   1  19   3    9.49    8.31
   1  19   4   39.56   14.77
 -19  20   5   41.39   17.76
 -19  20   6   27.64   14.45
 -19  20   7    4.43    8.83
 -19  20   8  -10.87   14.16
 -20   1   8  -13.21    5.94
 -19  20   9   11.94   15.33
 -20   1   9    4.67    8.10
 -19  20  10   23.27   13.97
 -20   1  10   29.41   18.25
 -20   1  11    6.40   11.53
 -19  20  11   16.42   15.34
 -20   1  12    2.01    9.61
 -19  20  12   14.21   16.54
 -20   1  13   49.76   22.92
 -20   1  14   25.76   19.16
   0 -20  -4    9.68    7.86
   0  20   1   33.54   13.29
   0  20   2  -12.15    9.47
   0  20   3   33.09   13.81
   0  20   4  -19.40   11.33
 -20  20   6   10.23   12.90
 -20  20   7    1.06    9.82
 -20  20   8   -5.88   12.67
 -20   0   8   -4.93    7.89
 -20  20   9   -9.05   13.09
 -20   0   9    3.91   11.56
 -20  20  10   -1.76   13.23
 -20   0  10   21.49   13.07
 -20  20  11  -29.26   19.61
 -20   0  11   -5.36    9.05
 -20   0  12  -24.83   18.49
 -20  20  12   35.67   23.90
 -20   0  13   24.95   17.05
 -20   0  14   16.06   12.82
  -1  21   1   22.41   12.77
  -1  21   2   38.66   13.74
  -1  21   3    7.37    9.81
  -1  21   4   10.21    9.20
  -1  21   5    8.40    9.50
 -21  20   6   26.06   16.94
 -21  20   7    9.46   11.89
 -21  20   8    2.61    8.53
 -20  -1   8    6.90    8.80
 -21  20   9    8.34    9.88
 -20  -1   9   14.65   13.05
 -21  20  10   18.80   14.79
 -20  -1  10   -7.53    9.56
 -21  20  11   16.07   10.91
 -20  -1  11    4.77    9.25
 -21  20  12    6.51   10.97
 -20  -1  12   12.76   13.41
 -20  -1  13   34.20   19.06
  19   2 -10   13.24    9.89
  19   2  -9   -2.08    8.89
  -2  21   2   19.73   13.04
  -2  21   3   -3.22    6.09
  -2  21   4   -4.62    9.47
  -2  21   5    2.55    5.69
  -2  21   5   -8.18    6.62
 -21  19   6    8.64   10.59
  -2  21   6   -2.35    8.82
  -2  21   7   -4.84   12.31
 -21  19   7  -13.32   11.97
  -2  21   8  -12.54   13.90
 -21  19   8   -5.71   10.10
 -19  -2   8   25.59   14.37
 -21  19   9  -11.55   12.91
 -19  -2   9    9.46   10.78
  -2  21   9  -14.25   13.02
 -21  19  10   -8.60   12.32
 -19  -2  10  -25.26   13.47
  -2  21  10  -16.88   16.30
 -19  -2  11   12.16   11.48
 -21  19  11   31.09   20.83
  -2  21  11   12.61   13.47
 -19  -2  12   19.07   15.38
  -2  21  12    3.53   10.00
 -21  19  12   11.47   15.34
 -19  -2  13   -2.16   11.40
  18   3 -11    4.19    6.30
  18   3 -10   21.43   13.06
  18   3  -9    5.78    9.31
  18   3  -8   -8.02    9.61
  18   3  -7    6.98    7.08
  -3  21   2   31.64   13.98
  -3  21   3   10.98    9.49
  -3  21   3   24.42    9.59
  -3  21   4   21.01   12.40
  -3  21   4   23.47   11.74
  -3  21   5    3.15    6.48
  -3  21   5   13.82    8.83
  -3  21   6  -12.29   11.44
  -3  21   7   10.15   12.42
 -21  18   7   15.14   13.65
  -3  21   8    5.02    8.48
 -21  18   8  -13.51   12.36
 -18  -3   8    7.91    7.37
  -3  21   9   -4.06   11.97
 -21  18   9   13.73   16.47
 -18  -3   9    3.22    8.27
  -3  21  10   16.54   14.62
 -18  -3  10   27.16   16.21
 -21  18  10    9.95    9.63
 -18  -3  11    6.02    7.32
  -3  21  11   10.11   10.68
 -21  18  11    7.64   14.23
  -3  21  12   -1.07   13.65
 -18  -3  12   32.79   18.65
 -21  18  12   19.09   16.18
 -18  -3  13   22.33   16.47
  -3  21  13   16.92   15.22
  17   4 -11   12.92   11.63
  17   4 -10    8.85    8.15
  17   4  -9    6.39    9.35
  17   4  -8    4.66    6.79
  17   4  -7   -3.90   10.44
  17   4  -6   38.01   15.87
  17   4  -5   46.88   16.91
  -4  21   2    3.87    5.78
  -4  21   3   89.46   18.31
  -4  21   3   75.60   17.97
  -4  21   4    5.88    9.32
  -4  21   4    9.97    8.83
 -21  17   5   31.28    7.69
  -4  21   5   50.78   15.87
  -4  21   5   43.29   14.44
  -4  21   6   27.00   13.66
  -4  21   7   16.94   15.15
 -21  17   7    5.25    7.55
  -4  21   8    3.72    8.87
 -17  -4   8    5.93    7.80
 -21  17   8   -7.37   10.99
  -4  21   9    6.67   13.88
 -17  -4   9   14.42    8.53
 -21  17   9   20.22   16.07
  -4  21  10   17.32   14.30
 -17  -4  10    1.69   11.03
 -21  17  10   12.62   17.24
  -4  21  11   16.09   15.73
 -21  17  11    6.01   13.15
 -17  -4  11   10.68   12.39
 -21  17  12  -16.64   21.74
  -4  21  12   14.77   15.88
 -17  -4  12   37.22   18.29
 -17  -4  13   29.35   18.01
  -4  21  13    7.40   13.77
  16   5 -12   24.26   15.65
  16   5 -11   20.02   11.88
  16   5 -10  -10.95    9.29
  16   5  -9    1.74    6.89
  16   5  -8    3.05    6.75
  16   5  -7   -0.75    9.31
  16   5  -6   11.17   10.51
  16   5  -5   -2.84    7.92
  16   5  -4   20.88   12.74
  -5  21   0    1.54    2.42
  -5  21   1   28.84    7.50
  -5  21   2   -1.64    5.19
  -5  21   3   60.78   18.02
  -5  21   3   46.05   14.03
  -5  21   4    9.46    5.82
  -5  21   4   21.20    9.93
  -5  21   5    0.42    6.28
 -21  16   5    5.68    4.33
  -5  21   5    7.58    8.15
  -5  21   6   13.38   10.41
  -5  21   7   -9.78   12.71
 -16  -5   7    0.40    5.25
  -5  21   8   -3.44   10.74
 -16  -5   8   -4.66    5.76
 -21  16   8   -0.85    7.27
  -5  21   9   10.37   14.10
 -16  -5   9   17.47   10.93
 -21  16   9   13.23   12.26
 -16  -5  10   -9.86   10.55
  -5  21  10   -4.05   11.01
 -21  16  10    3.67   15.53
 -21  16  11   -6.28   10.85
  -5  21  11    1.27   14.33
 -16  -5  11   13.39    7.97
 -21  16  12   -4.42   15.23
  -5  21  12   -0.47    9.21
 -16  -5  12   -8.93    9.67
  -5  21  13   32.60   23.57
  15   6 -12   -0.37    6.79
  15   6 -11   -8.04    8.33
  15   6 -10   16.06   11.98
  15   6  -9   22.67   14.89
  15   6  -8    0.63    8.63
  15   6  -7    9.89    8.80
  15   6  -6    6.38    8.97
  15   6  -5   37.52   15.74
  15   6  -4   61.60   20.44
  15   6  -3  238.76   36.75
  -6  21  -1   25.81    4.98
  -6  21   0  102.53   12.72
  -6  21   1   40.12    9.76
  -6  21   2   46.75   12.89
  -6  21   3  227.25   28.83
  -6  21   4   62.95   16.71
  -6  21   4   71.53   17.45
  -6  21   5   15.25    5.51
  -6  21   5   19.61    9.29
 -21  15   5   20.00    6.85
  -6  21   6    3.28    6.43
  -6  21   7    8.29    9.00
 -15  -6   7   14.89   11.31
  -6  21   8    7.43    9.32
 -15  -6   8   19.47   11.49
 -21  15   8    9.33   11.21
 -15  -6   9    6.76    9.44
  -6  21   9    9.46    9.17
 -21  15   9   10.59    9.37
  -6  21  10  -11.29   13.65
 -21  15  10    5.81   12.99
 -15  -6  10   -6.48   10.62
  -6  21  11   -8.11    8.59
 -21  15  11    3.43   13.93
 -15  -6  11   14.58   11.35
 -21  15  12    0.17   13.27
  -6  21  12   27.33   19.52
 -15  -6  12   10.85   13.66
  -6  21  13   31.53   22.59
  14   7 -12   14.26   11.92
  14   7 -11   -6.00    7.39
  14   7 -10  -11.07    9.75
  14   7  -9   10.13    7.60
  14   7  -8   -8.69    8.93
  14   7  -7   -0.22    7.23
  14   7  -6    4.91    8.04
  14   7  -5    4.90    8.55
  14   7  -4   30.42   13.87
  14   7  -3   77.34   21.91
  14   7  -2   40.23   14.94
  -7  21  -2   17.44    3.66
  -7  21  -1   40.13    7.28
  -7  21   0   93.35   13.51
  -7  21   1   55.12   12.60
  -7  21   2   36.03   10.52
  -7  21   3   60.04   15.00
  -7  21   4   47.38   13.00
  -7  21   4   27.67   12.53
 -21  14   4   31.41    8.76
 -21  14   5   20.93    7.04
  -7  21   5    7.41    7.65
  -7  21   5   26.22    9.58
  -7  21   6   -0.38    8.20
  -7  21   7   12.90    9.84
 -14  -7   7    3.39    9.17
 -14  -7   8    2.60    6.29
  -7  21   8  -13.31    8.44
 -21  14   8   -1.03    9.59
 -14  -7   9   -4.91    7.43
  -7  21   9   -8.10   10.63
 -21  14   9   10.09   13.34
 -21  14  10    4.85    9.54
 -14  -7  10    6.23    6.23
 -21  14  11   17.15   10.73
  -7  21  11    4.75   11.66
 -14  -7  11    9.88    8.10
 -21  14  12   17.37   17.70
  -7  21  12   22.09   16.04
 -14  -7  12   -6.03    7.37
  -7  21  13   25.53   21.89
 -21  14  13   48.27   26.18
  13   8 -13   -9.70   11.51
  13   8 -12    7.22   12.37
  13   8 -11    4.52    7.31
  13   8 -10   -9.89   10.20
  13   8  -9   30.97   14.48
  13   8  -8    0.96    8.47
  13   8  -7    2.99    6.95
  -8  21  -6   -3.22    3.16
  13   8  -6   -7.69   10.68
  13   8  -5    5.61    6.99
  -8  21  -5    6.67    3.35
  13   8  -4   23.14    9.49
  -8  21  -4   10.15    3.16
  13   8  -3   73.23   21.66
  -8  21  -3   51.43    7.13
  -8  21  -2   -1.00    3.21
  13   8  -2   -9.16    9.54
  13   8  -1   -7.07    9.69
  -8  21  -1    2.25    2.86
  -8  21   0   48.45   11.04
  -8  21   1   -6.02    6.29
  -8  21   2   -8.34    8.79
  -8  21   3   48.83   13.77
  -8  21   4   28.38   10.12
 -21  13   4   25.56    9.46
  -8  21   4   22.14   10.32
  -8  21   5   11.69    8.80
  -8  21   5   17.81   10.75
 -21  13   5    8.15    4.42
  -8  21   6  -10.75    9.82
 -13  -8   6    4.58    6.07
  -8  21   6    8.48    5.90
 -13  -8   7   16.42   10.66
  -8  21   7   -2.19    8.10
 -13  -8   8    2.76    6.47
  -8  21   8   18.23   12.03
 -21  13   8   25.89   14.38
  -8  21   9   10.79   10.47
 -21  13   9   21.20   15.40
 -13  -8   9   20.35   11.51
  -8  21  10    1.84    7.76
 -21  13  10    2.88   11.32
 -13  -8  10   -0.25    7.67
 -21  13  11   15.37   16.08
  -8  21  11   20.50   16.93
 -13  -8  11   15.10   13.82
 -21  13  12   12.94   14.56
  -8  21  12  -17.88   13.98
  -8  21  13    9.36   17.91
 -21  13  13  -11.67   16.47
  12   9  -9  -10.20   11.12
  12   9  -8   -2.16    6.80
  12   9  -7   -0.41   10.49
  -9  21  -6   24.78    7.84
  12   9  -6   17.63   10.97
  -9  21  -5   -0.66    2.57
  12   9  -5   11.71    8.56
  12   9  -4    6.65    8.35
  -9  21  -4   12.22    4.92
 -12  -9  -3   48.02   16.05
  12   9  -3   38.52   14.85
  12   9  -2   19.69   13.20
  -9  21  -1    5.39    4.43
  12   9  -1   11.98    6.47
  -9  21   0   18.82    8.59
  12   9   0   17.43   10.23
  -9  21   1   13.29    5.73
  -9  21   2   27.43    8.82
  -9  21   3   30.01   12.11
 -21  12   3   45.59   12.58
  -9  21   4   19.37   12.15
 -21  12   4   15.11    7.04
  -9  21   5    1.15    4.35
  -9  21   5    4.67   10.50
 -12  -9   6   32.83   11.67
  -9  21   6   19.02   12.27
  -9  21   6   14.98    7.39
 -12  -9   7   -1.39    5.45
  -9  21   7   12.93   11.52
 -12  -9   8    4.95    6.02
  -9  21   8   -1.24   10.84
 -21  12   8   19.66   14.88
  -9  21   9  -12.29   10.47
 -21  12   9   -0.76    7.51
 -12  -9   9    2.46    6.96
 -21  12  10    5.04   14.05
  -9  21  10   28.32   13.89
 -12  -9  10   11.68   12.02
 -21  12  11    9.09   11.91
  -9  21  11   -8.87   13.58
 -12  -9  11    9.61   10.05
 -21  12  12   31.16   21.46
  -9  21  12  -11.19   15.25
  -9  21  13   -8.13   19.04
 -21  12  13   -1.89    8.98
  11  10  -7   -0.08    8.19
 -10  21  -6   41.21    9.75
  11  10  -6   34.74   16.28
 -10  21  -5    2.99    4.34
  11  10  -5   10.54    6.76
  11  10  -4   13.76   11.06
 -11 -10  -3   -0.49    7.10
  11  10  -3   33.56   13.77
 -11 -10  -2   10.65    6.53
  11  10  -2    9.74   11.45
  11  10  -1  -14.06   13.21
  11  10   0    6.24    7.63
 -10  21   0   25.46    8.56
 -10  21   1    1.16    4.50
 -10  21   2    7.76    5.10
 -21  11   3   14.78    8.37
 -10  21   3   18.71   10.40
 -21  11   4   13.30    7.95
 -10  21   4   15.94   11.02
 -10  21   5    8.04    5.98
 -10  21   5    9.00    7.66
 -11 -10   6   47.82   12.55
 -10  21   6   39.12   16.11
 -10  21   6   46.18   10.53
 -11 -10   7    0.75    6.13
 -10  21   7   21.42   13.10
 -10  21   8   13.96   11.89
 -21  11   8   26.06   16.68
 -11 -10   8    7.72    7.58
 -10  21   9   -9.05   11.85
 -21  11   9    3.76    9.72
 -11 -10   9   -9.54    8.59
 -21  11  10   19.96   17.99
 -10  21  10   -1.43   10.03
 -11 -10  10   -3.90    7.81
 -21  11  11    0.22   10.14
 -10  21  11    8.44   11.87
 -21  11  12  -13.29   18.14
 -10  21  12   17.11   15.35
 -10  21  13  -16.63   17.89
 -21  11  13  -20.24   17.40
 -11  21  -6   -3.20    6.73
  10  11  -5    6.24    7.26
  10  11  -4    1.87    7.73
 -10 -11  -3    7.15    8.19
  10  11  -3    3.08    6.90
 -10 -11  -2   13.56    9.87
  10  11  -2   16.94   11.23
  10  11  -1   -5.68    7.90
 -10 -11  -1    1.04    5.37
  10  11   0    7.46    6.60
 -11  21   0    6.13    5.96
  10  11   1  -31.90   15.39
 -11  21   1   13.76    7.82
 -11  21   2   20.44    9.31
 -21  10   2    5.85    4.75
 -11  21   3   20.60    9.58
 -21  10   3   20.94   10.66
 -11  21   4    5.13    6.21
 -21  10   4    9.25    5.29
 -10 -11   5   33.06    9.91
 -11  21   5   24.08    7.75
 -11  21   5   -0.45   11.51
 -10 -11   6   -2.77    4.09
 -11  21   6   10.14   10.68
 -11  21   6    9.70    5.25
 -11  21   7   -2.23    6.78
 -10 -11   7    3.11    5.43
 -11  21   8    5.37   10.56
 -10 -11   8   12.46    8.16
 -21  10   8   28.99   14.81
 -10 -11   9   -0.71    5.46
 -11  21   9   12.66   14.75
 -21  10   9   13.46   14.97
 -10 -11  10   12.05   10.59
 -21  10  10   11.51    9.34
 -11  21  10   33.85   18.05
 -21  10  11   -1.79    9.39
 -11  21  11   -5.18    8.98
 -21  10  12    3.55   16.66
 -11  21  12   15.53   17.23
 -11  21  13    9.25   10.08
 -21  10  13  -10.88   12.07
 -12  21  -6   -0.39    2.95
   9  12  -4   15.24   10.39
  -9 -12  -4   41.32   15.92
  -9 -12  -3    7.47    6.64
   9  12  -3   30.33   12.85
  -9 -12  -2  -12.32    9.81
   9  12  -2   12.41    8.78
  -9 -12  -1   44.08   12.93
   9  12  -1   74.90   21.95
   9  12   0   22.52   11.93
  -9 -12   0   12.72    4.66
   9  12   1   39.99   12.50
 -12  21   1   57.57   15.14
 -21   9   2   -3.03    6.21
 -12  21   2    6.90    7.57
 -21   9   3   13.65    7.47
 -12  21   3   14.41    9.45
 -12  21   4   23.60   11.23
 -21   9   4    4.31    5.00
 -12  21   5    1.12   11.29
  -9 -12   5   24.22    7.66
 -12  21   5   27.20    7.94
  -9 -12   6   -3.17    6.16
 -12  21   6    5.91    3.29
  -9 -12   7   22.29    8.46
 -12  21   7   45.72   17.73
  -9 -12   8   21.69   10.13
 -12  21   8   18.27   14.36
 -21   9   8   26.69   16.26
  -9 -12   9   24.06   10.48
 -21   9   9   24.98   16.42
 -12  21   9   45.68   19.61
 -21   9  10   11.93   13.25
 -12  21  10   13.17   15.12
 -21   9  11  -18.35   15.80
 -12  21  11    4.51   10.26
 -21   9  12    4.79   10.00
 -12  21  12   24.96   14.33
 -12  21  13  -12.59   12.97
 -21   9  13  -17.83   15.46
 -13  21  -7    2.17    4.46
  -8 -13  -4   51.06   15.62
  -8 -13  -3   19.80   11.48
   8  13  -3   43.36   17.55
  -8 -13  -2    2.64    4.83
   8  13  -2    1.57    7.07
  -8 -13  -1    6.77    5.61
   8  13  -1    3.52    7.65
   8  13   0  124.63   26.59
  -8 -13   0  126.16   18.32
   8  13   1   22.95   11.92
  -8 -13   1   16.52    6.63
   8  13   2   -1.70    8.02
 -21   8   2    7.07    8.27
 -13  21   2   16.75    9.91
 -21   8   3   11.21    7.94
 -13  21   3   11.11    8.12
  -8 -13   4   33.84    7.28
 -13  21   4   54.24   17.18
 -21   8   4   45.37   13.10
 -13  21   5   64.63   18.74
  -8 -13   5   41.93    8.19
 -13  21   6    3.24    2.76
  -8 -13   6    8.76    5.35
  -8 -13   7   -0.03    3.28
 -13  21   7  -11.66   14.69
  -8 -13   8   48.32   12.11
 -13  21   8   53.15   20.39
 -21   8   8   62.39   21.09
 -21   8   9   21.58   16.00
 -13  21   9   -9.12    9.55
 -21   8  10  -12.61    9.07
 -13  21  10   18.80   14.32
 -21   8  11   -8.97   10.08
 -13  21  11    5.19   16.16
 -21   8  12   13.93   13.64
 -13  21  12   11.91   16.34
 -13  21  13    6.81   13.17
 -21   8  13    7.20   11.11
  -7 -14  -4   35.34   13.64
  -7 -14  -3   15.51    9.40
   7  14  -3   28.02   14.62
   7  14  -2   34.93   15.13
  -7 -14  -2   28.52   10.39
  -7 -14  -1    6.16    4.22
   7  14  -1    5.54    8.93
  -7 -14   0  -12.95    7.91
   7  14   0   -5.84   11.41
  -7 -14   1   11.50    5.31
   7  14   1   -6.54    9.39
  -7 -14   2   14.24    4.37
   7  14   2    5.02    9.21
  -7 -14   3   16.04    4.67
 -14  21   3   27.68   12.18
 -21   7   3   17.63   10.35
  -7 -14   3    7.48    3.14
 -14  21   4   47.91   16.24
  -7 -14   4   24.52    5.14
 -14  21   5   21.08   14.52
  -7 -14   5   15.28    4.47
 -14  21   6   -4.22   12.21
 -14  21   6   -1.59    2.37
  -7 -14   6    1.18    2.92
 -14  21   7  -20.11   13.65
  -7 -14   7   10.10    4.73
 -14  21   8   37.55   19.55
 -21   7   9   17.50   14.46
 -14  21   9   11.48   11.97
 -21   7  10   19.38   13.59
 -14  21  10   12.12   14.48
 -21   7  11    9.62   13.05
 -14  21  11   19.76   17.01
 -21   7  12   -6.58    9.73
 -14  21  12    8.89   12.95
 -14  21  13   -9.05   12.93
 -21   7  13  -19.17   15.21
  -6 -15  -4   25.08   15.46
  -6 -15  -3   18.84    9.46
  -6 -15  -2   23.12    8.08
   6  15  -2   33.24   17.08
  -6 -15  -1   22.44    8.63
   6  15  -1   26.81   15.87
  -6 -15   0   -2.65    3.73
   6  15   0   -6.58   12.96
  -6 -15   1   15.83    5.37
   6  15   1   11.84   10.46
   6  15   2   11.68   10.03
  -6 -15   2    8.99    2.90
 -15  21   3   39.11   15.36
   6  15   3    0.81    8.07
 -15  21   4   32.69   14.24
 -15  21   5   31.66   16.01
 -15  21   6    4.94   10.27
 -15  21   6    5.35    3.35
 -15  21   7   29.63   14.14
 -15  21   8   13.16   11.94
 -21   6   9    8.75   12.51
 -15  21   9    6.53    8.99
 -21   6  10   -3.80   10.30
 -15  21  10   23.23   16.01
 -21   6  11   -0.05    8.27
 -15  21  11   36.30   23.57
 -21   6  12   21.20   16.97
 -15  21  12   21.20   21.23
 -15  21  13    7.10   14.17
 -21   6  13    2.59   11.54
  -5 -16  -4   28.06   11.72
  -5 -16  -3   86.88   18.55
  -5 -16  -2   29.99   12.18
   5  16  -1   70.90   21.04
  -5 -16  -1   78.48   13.74
   5  16   0    9.20    9.40
  -5 -16   0   -0.26    3.41
  -5 -16   1   32.31    5.50
   5  16   1   62.98   19.25
   5  16   2    7.87    7.86
   5  16   3   97.18   23.43
 -16  21   4   41.04   14.75
 -16  21   5   22.75   13.83
 -16  21   6   82.32   23.60
 -16  21   6   31.71    5.44
 -16  21   7   35.85   15.65
 -16  21   8   28.04   13.57
 -21   5   9   19.10   13.17
 -16  21   9    3.97   10.55
 -21   5  10   19.41   13.29
 -16  21  10   10.94   13.24
 -21   5  11    5.17    7.80
 -16  21  11   29.40   21.15
 -21   5  12   21.39   19.56
 -16  21  12   24.26   19.26
 -21   5  13  -13.97   15.01
  -4 -17  -4   67.23   17.49
  -4 -17  -3  114.07   20.12
  -4 -17  -2   77.58   15.17
  -4 -17  -1    2.66    4.66
   4  17  -1   17.61   14.27
  -4 -17   0   -0.74    3.00
   4  17   0    0.07    7.28
   4  17   1    7.75    9.53
   4  17   2  102.24   24.23
   4  17   3  140.16   28.33
 -17  21   4   85.29   21.99
 -17  21   5   44.37   18.12
 -17  21   6   14.16   11.95
 -17  21   7    4.63   10.49
 -17  21   8   -1.27    7.67
 -17  21   9   -5.45   13.76
 -21   4   9    6.19   12.68
 -21   4  10   17.60   12.98
 -17  21  10    0.07    7.80
 -21   4  11   -8.93   11.71
 -17  21  11   32.76   20.15
 -21   4  12   10.70   12.96
 -17  21  12    4.73   16.03
 -21   4  13    7.99   11.49
  -3 -18  -4   15.11    7.59
  -3 -18  -3   22.66    7.92
  -3 -18  -2   41.67   11.17
  -3 -18  -1   19.05    7.23
   3  18   0  129.50   26.67
   3  18   1    0.48    9.34
   3  18   2   45.14   15.16
   3  18   3   41.21   15.60
   3  18   4   17.51   10.94
 -18  21   5   25.81   16.15
 -18  21   6   14.40   12.81
 -18  21   7   19.44   13.91
 -18  21   8   14.66    9.70
 -18  21   9   -3.01   10.55
 -21   3   9   13.07   11.20
 -21   3  10   15.02   11.87
 -18  21  10    3.68   11.13
 -21   3  11   -6.35   10.27
 -18  21  11    8.53   13.26
 -21   3  12   29.50   19.20
 -18  21  12   35.00   21.28
 -21   3  13   -2.18   10.76
  -2 -19  -4   19.05   11.19
  -2 -19  -3   48.63   13.16
  -2 -19  -2   36.53    9.94
   2  19   0   45.17   15.22
   2  19   1   55.16   16.82
   2  19   2   25.17   11.14
   2  19   3   40.29   14.75
   2  19   4   -2.69    6.72
 -19  21   5   11.53   12.90
 -19  21   6    8.59   11.36
 -19  21   7   -0.81    7.14
 -19  21   8   -0.31    7.77
 -19  21   9   -8.60   13.04
 -21   2   9    4.15    6.42
 -19  21  10   26.38   17.51
 -21   2  10  -23.34   14.86
 -21   2  11   20.57   15.63
 -19  21  11    4.41   10.89
 -21   2  12    0.25   10.16
 -19  21  12   14.95   15.72
 -21   2  13    3.57   12.56
  -1 -20  -4   16.32   10.13
  -1 -20  -3   64.48   14.91
   1  20   1   26.69   11.58
   1  20   2    1.41    8.02
   1  20   3   43.39   17.02
   1  20   4    5.34    7.21
 -20  21   5   43.31   18.37
 -20  21   6   13.72   12.06
 -20  21   7    5.03    9.49
 -20  21   8   -0.73   10.24
 -21   1   8   14.97   13.06
 -20  21   9  -19.43   12.44
 -21   1   9   -5.98    8.07
 -20  21  10   -5.26    8.84
 -21   1  10    1.95   10.75
 -21   1  11   15.74   12.37
 -20  21  11  -24.15   12.59
 -21   1  12   13.40    8.65
 -20  21  12   22.52   21.34
 -21   1  13    4.39   13.55
   0  21   1   -0.50    8.03
   0  21   2  -21.93   15.10
   0  21   3   17.27   11.20
   0  21   4   26.45   12.18
 -21  21   6   22.13   15.53
 -21  21   7   16.23   13.79
 -21  21   8   41.26   21.87
 -21   0   8    2.50    9.15
 -21  21   9   -5.66    9.64
 -21   0   9   12.92   11.09
 -21  21  10    4.35    9.86
 -21   0  10    5.84   11.07
 -21  21  11   10.23   16.34
 -21   0  11   11.34   14.78
 -21   0  12    0.11    8.16
 -21   0  13   27.80   23.74
  -1  22   1    8.81    9.80
  -1  22   2    5.37    7.03
  -1  22   3   26.25   14.15
  -1  22   4    7.60    9.16
  -1  22   5   23.61   13.34
 -22  21   6   15.60   11.27
 -22  21   7   18.23   14.70
 -22  21   8   -2.00   11.99
 -21  -1   8    3.62    8.87
 -22  21   9   15.85   15.59
 -21  -1   9    7.23    9.45
 -22  21  10   21.02   16.48
 -21  -1  10   -7.69    7.68
 -22  21  11   31.69   19.69
 -21  -1  11    8.29   12.15
 -21  -1  12  -14.71   16.05
 -21  -1  13   79.76   29.10
  -2  22   2   23.76   14.80
  -2  22   3   17.09   12.00
  -2  22   4   31.76   12.82
  -2  22   5   10.10   10.95
 -22  20   6   34.49   17.35
 -22  20   7   11.13   10.68
  -2  22   7    9.75   10.48
 -22  20   8   13.50   10.28
 -20  -2   8   15.17   10.06
  -2  22   8  -10.85   14.04
 -22  20   9    1.12    8.98
 -20  -2   9   21.43   13.66
  -2  22   9   -4.39   12.41
 -22  20  10   10.68   11.94
 -20  -2  10   14.50   11.81
  -2  22  10    6.93    7.65
 -22  20  11   22.75   18.74
 -20  -2  11   -1.09    7.06
 -20  -2  12   35.05   17.21
 -20  -2  13   28.66   17.43
  19   3 -10   -2.77    8.78
  19   3  -9    9.96    7.26
  19   3  -8   31.05   12.75
  -3  22   2   54.55   18.28
  -3  22   3   32.71   14.45
  -3  22   4    5.56    6.28
  -3  22   4   -8.31    7.08
  -3  22   5   16.91   11.85
  -3  22   5   10.50   10.06
  -3  22   6    9.71    9.92
  -3  22   7    4.11    6.70
 -22  19   7   -8.80   10.49
  -3  22   8   24.45   14.81
 -22  19   8   14.10   15.71
 -19  -3   8   14.06   11.10
  -3  22   9   27.74   17.24
 -22  19   9    9.48   13.63
 -19  -3   9   13.29   11.15
  -3  22  10   -4.08    7.47
 -19  -3  10  -11.26   12.28
 -22  19  10    0.51   12.89
  -3  22  11  -20.97   17.41
 -19  -3  11    0.07    7.35
 -19  -3  12   -5.73   10.18
  -3  22  12    2.81   10.50
  -3  22  13   24.18   19.93
  18   4 -11    1.87    7.63
  18   4 -10    7.48    6.38
  18   4  -9   -6.92    8.17
  18   4  -8   -0.97    6.50
  18   4  -7    9.31   10.93
  18   4  -6    4.64    9.16
  -4  22   2  144.10   20.38
  -4  22   3    3.20    5.02
  -4  22   3    8.04    9.42
  -4  22   4   22.91   11.92
  -4  22   4   26.67   11.77
  -4  22   5   29.98   13.18
  -4  22   5   29.04   13.06
  -4  22   6   -1.39    9.70
  -4  22   7    7.66    9.28
 -22  18   7    3.08   10.43
  -4  22   8   10.06   10.58
 -18  -4   8    5.52   10.34
 -22  18   8    4.96    7.53
  -4  22   9    1.70   12.59
 -18  -4   9    5.84    6.36
 -22  18   9   15.64   13.14
  -4  22  10   32.23   17.79
 -18  -4  10    9.75   10.39
 -22  18  10    6.85    8.37
  -4  22  11    4.33   12.43
 -22  18  11   20.67   17.80
 -18  -4  11    6.07   10.51
 -22  18  12   30.30   22.94
  -4  22  12   16.27   18.93
 -18  -4  12   29.92   17.86
  -4  22  13   19.49   13.26
  17   5 -11    1.12    7.90
  17   5 -10   21.12   14.72
  17   5  -9    6.35    8.04
  17   5  -8   -0.62    6.28
  17   5  -7    0.83    6.83
  17   5  -6   11.00   11.13
  17   5  -5   64.78   22.06
  -5  22   1   15.38    6.55
  -5  22   2   42.84   12.25
  -5  22   3   37.09   12.34
  -5  22   3   35.68   13.37
  -5  22   4    9.74    7.81
  -5  22   4    9.45    8.73
  -5  22   5   28.01   12.83
  -5  22   5   33.33   14.66
  -5  22   6    2.07    5.97
  -5  22   7   14.37   14.09
 -17  -5   7   23.68   11.07
 -22  17   7   16.29   12.96
  -5  22   8   -3.19   10.22
 -17  -5   8    8.42    6.25
 -22  17   8   -0.02    9.55
  -5  22   9    1.56    7.79
 -17  -5   9   11.66   11.13
 -22  17   9   -1.59   11.62
 -17  -5  10    8.37    7.56
  -5  22  10   17.12   14.15
 -22  17  10   31.43   18.89
 -22  17  11    3.99    9.59
 -17  -5  11   -0.37    6.72
 -22  17  12   24.01   16.14
  -5  22  12   17.31   14.29
 -17  -5  12   30.46   16.62
  -5  22  13    7.16   11.43
  16   6 -12   -3.31    9.61
  16   6 -11  -12.99   10.19
  16   6 -10   33.49   14.67
  16   6  -9  -10.30    9.21
  16   6  -8   -9.96    8.59
  16   6  -7   -2.72   10.64
  16   6  -6    9.75   10.33
  16   6  -5   23.52   16.93
  16   6  -4   33.30   13.21
  -6  22   0   12.55    4.06
  -6  22   1    9.87    5.71
  -6  22   2   13.60    8.05
  -6  22   3    9.19    6.65
  -6  22   4   11.57    6.47
  -6  22   4   12.75    7.23
  -6  22   5   -4.91   10.34
  -6  22   5    4.60    4.70
  -6  22   6   38.67   14.83
  -6  22   7   -9.79   14.16
 -16  -6   7   27.65   13.21
  -6  22   8   -6.66   10.31
 -16  -6   8    9.43    6.03
 -22  16   8    6.09   12.92
 -16  -6   9   -3.49    9.37
  -6  22   9    1.36    9.18
 -22  16   9   -2.70   10.86
 -16  -6  10   -5.63    6.33
  -6  22  10   14.81   14.04
 -22  16  10   -2.89   11.22
  -6  22  11    9.45   15.41
 -22  16  11    3.67   12.65
 -16  -6  11   34.50   18.07
 -22  16  12   -4.49    9.63
  -6  22  12   21.80   16.90
  -6  22  13   17.50   17.12
  15   7 -12   -9.08    7.62
  15   7 -11   21.64   16.53
  15   7 -10   30.09   14.81
  15   7  -9   14.81   12.56
  15   7  -8   -1.03   11.14
  15   7  -7   -2.99   11.55
  15   7  -6   17.01   10.28
  15   7  -5    2.42    6.89
  15   7  -4   11.45    9.67
  15   7  -3   49.88   19.03
  -7  22  -1   40.27    6.88
  -7  22   0   -0.90    3.25
  -7  22   1   57.64   12.37
  -7  22   2   16.40    8.16
  -7  22   3   32.22   11.55
  -7  22   4   18.33    9.74
  -7  22   4   18.00    9.74
 -22  15   4   10.36    5.14
 -22  15   5   20.53    8.08
  -7  22   5   -7.05    9.22
  -7  22   5   18.46    5.35
  -7  22   6   23.35   13.62
  -7  22   6   19.79    8.60
  -7  22   7   -1.51    8.97
 -15  -7   7   12.59    9.92
 -15  -7   8   12.12    7.05
  -7  22   8   -3.68   13.12
 -22  15   8  -11.93   10.72
 -15  -7   9    1.44    7.09
  -7  22   9   -9.94   14.03
 -22  15   9   20.47   16.97
  -7  22  10   12.90    9.69
 -22  15  10   12.76   15.27
 -15  -7  10    2.03    6.07
  -7  22  11   -1.71   12.98
 -22  15  11   15.75   17.29
 -15  -7  11   10.39    6.07
 -22  15  12   -8.16   13.73
  -7  22  12    5.92    9.68
  -7  22  13    6.88   10.30
  14   8 -12   22.87   14.50
  14   8 -11    9.72   10.15
  14   8 -10    4.60   12.38
  14   8  -9    6.75    8.32
  14   8  -8   -2.43    7.76
  14   8  -7    6.79    8.07
  14   8  -6   14.84   10.73
  14   8  -5   19.71   11.30
  14   8  -4   14.23   10.13
  14   8  -3   11.10   11.72
  14   8  -2   46.32   15.81
  -8  22  -2   15.91    4.26
  -8  22  -1   13.94    5.20
  -8  22   0   72.65   12.65
  -8  22   1    7.66    4.78
  -8  22   2   34.76   10.20
  -8  22   3    6.97    7.85
 -22  14   4   23.81    8.90
  -8  22   4   31.13   13.00
  -8  22   4   38.65   13.70
  -8  22   5   18.06    9.07
  -8  22   5   24.72   13.43
 -22  14   5   20.07    7.70
  -8  22   6  -11.38   11.73
  -8  22   6    4.08    5.94
  -8  22   7   19.25   11.53
 -14  -8   7   32.01   13.14
 -14  -8   8   -3.71    5.65
  -8  22   8  -11.45   11.71
 -22  14   8    1.23   12.85
  -8  22   9    6.63    9.98
 -22  14   9   -0.39   10.16
 -14  -8   9    2.47    8.13
  -8  22  10    7.90    9.06
 -22  14  10   42.85   21.46
 -14  -8  10   20.53   11.91
 -22  14  11   -0.75    8.67
  -8  22  11   -6.03    8.54
 -14  -8  11   10.63    9.95
 -22  14  12   -8.62   13.61
  -8  22  12   -4.48    8.47
  -8  22  13   29.90   15.26
  13   9 -13   13.63   15.28
  13   9 -12    7.39   10.78
  13   9 -11    4.98    7.46
  13   9 -10    5.12    8.57
  13   9  -9   -1.97    9.62
  13   9  -8   31.90   17.90
  13   9  -7   21.92   13.45
  13   9  -6   -5.21   10.12
  -9  22  -5   36.78    7.12
  13   9  -5   50.32   18.64
  13   9  -4   89.54   23.19
  -9  22  -4   44.80    7.85
  -9  22  -3   19.45    5.23
  13   9  -3   19.51    9.96
  -9  22  -2   27.30    6.96
  13   9  -2   27.57   13.45
  -9  22  -1   10.80    4.66
  13   9  -1    3.04    6.41
  -9  22   0   -9.20    6.74
  -9  22   1    7.84    6.15
  -9  22   2   12.58    6.92
  -9  22   3   15.66    9.97
 -22  13   3    5.46    7.01
 -22  13   4   74.60   15.73
  -9  22   4   66.04   17.65
  -9  22   5   59.44   14.31
 -22  13   5   51.44   12.25
  -9  22   5   72.68   21.65
  -9  22   6   -3.20    6.56
 -13  -9   6   15.40    9.01
  -9  22   6    1.12    5.31
 -13  -9   7   19.44   10.29
  -9  22   7    2.47   11.10
 -13  -9   8   20.51   11.09
  -9  22   8    5.21    9.07
 -22  13   8   32.13   15.56
  -9  22   9   16.75   10.54
 -22  13   9   19.90   13.33
 -13  -9   9   21.54   11.65
  -9  22  10   -0.12   10.46
 -22  13  10   32.35   20.03
 -13  -9  10    4.70    9.40
 -22  13  11  -13.61   13.99
  -9  22  11   -4.24   11.68
 -22  13  12   14.04   17.06
  -9  22  12    0.95   11.77
  -9  22  13  -11.99    9.68
  12  10 -10   -0.51    7.39
  12  10  -9   -0.14    8.99
  12  10  -8  -16.22   13.73
  12  10  -7   39.46   17.66
  12  10  -6   26.44   12.50
 -10  22  -5   24.72    7.20
  12  10  -5   17.41   10.14
  12  10  -4   50.86   19.31
  12  10  -3  145.51   30.50
 -12 -10  -2   71.60   17.18
  12  10  -2   72.97   20.89
 -10  22  -1   35.15    8.72
  12  10  -1   30.59   14.16
 -10  22   0   28.05    8.23
  12  10   0   24.41   10.97
 -10  22   1   33.78   10.72
 -10  22   2   70.40   17.07
 -22  12   3  110.33   19.84
 -10  22   3  126.21   23.15
 -22  12   4   39.80   12.04
 -10  22   4   50.89   16.26
 -10  22   5   56.74   13.77
 -10  22   5   58.76   18.26
 -10  22   6   30.02   10.12
 -12 -10   6   31.27   11.67
 -10  22   6   30.02   15.40
 -12 -10   7   10.57    9.48
 -10  22   7   -1.35    6.49
 -10  22   8   11.43    9.87
 -22  12   8    8.01   11.12
 -12 -10   8    1.44    6.48
 -10  22   9    9.43   12.27
 -22  12   9   -5.66    8.51
 -12 -10   9    2.16    5.28
 -10  22  10   11.52    9.10
 -22  12  10    8.23   13.21
 -12 -10  10   15.97    9.24
 -22  12  11   18.41   14.37
 -10  22  11    9.94    8.80
 -22  12  12    9.22   15.61
 -10  22  12    8.56   15.09
 -10  22  13    8.57   13.14
  11  11  -7    4.55    6.61
  11  11  -6  -13.92   15.25
  11  11  -5   50.86   14.99
 -11  22  -5   40.94    9.20
  11  11  -4   20.12   12.29
 -11 -11  -3   12.47    9.08
  11  11  -3   15.13   12.33
  11  11  -2   88.64   22.48
 -11 -11  -2   58.31   15.70
  11  11  -1  -11.48   12.82
 -11 -11  -1  -12.32   10.02
  11  11   0   22.26   11.93
 -11  22   0   35.67   10.74
 -11  22   1   -2.84    6.25
 -11  22   2   68.75   16.27
 -22  11   2   65.11   16.73
 -11  22   3   11.24    7.62
 -22  11   3   14.51    8.79
 -22  11   4   22.62    9.40
 -11  22   4   -9.29   10.54
 -11 -11   5   57.77   12.82
 -11  22   5   41.72   11.53
 -11  22   5   47.15   17.00
 -11  22   6   16.82    7.54
 -11 -11   6    1.94    3.86
 -11  22   6    5.84   11.56
 -11  22   7    5.06    9.02
 -11 -11   7    9.17    7.73
 -11  22   8   19.35   13.37
 -11 -11   8   12.94    8.81
 -22  11   8   22.77   14.39
 -11  22   9   -4.61    8.90
 -11 -11   9   10.77    9.70
 -22  11   9    1.82   10.19
 -22  11  10    7.81    8.23
 -11  22  10   20.08   15.10
 -22  11  11   -9.56   11.30
 -11  22  11   11.78   13.73
 -22  11  12   25.60   14.50
 -11  22  12  -15.83   19.86
 -11  22  13    9.06   16.61
  10  12  -6  -20.58   15.28
  10  12  -5   31.06   14.11
  10  12  -4   28.09   14.94
 -10 -12  -3    1.08    5.01
  10  12  -3   12.25   10.74
 -10 -12  -2    9.61    8.12
  10  12  -2    6.29    6.46
 -10 -12  -1    1.33    5.36
  10  12  -1   10.78    8.41
  10  12   0   21.38   12.79
  10  12   1    5.20   10.53
 -12  22   1    0.98    5.76
 -22  10   2    0.26    4.71
 -12  22   2    2.04    6.32
 -12  22   3   -6.20    9.64
 -22  10   3   -5.49    6.75
 -12  22   4   -5.90   10.66
 -22  10   4    9.87    6.30
 -12  22   5   30.80    9.57
 -12  22   5   16.41    9.81
 -12  22   6    8.59    4.39
 -12  22   6   21.69   11.84
 -10 -12   6   15.01    5.43
 -10 -12   7   10.91    7.51
 -12  22   7    7.82   10.87
 -10 -12   8   10.54    7.29
 -12  22   8   26.80   15.64
 -22  10   8   43.65   19.12
 -12  22   9   18.47   12.24
 -22  10   9    6.19    8.53
 -22  10  10  -13.50   12.55
 -12  22  10    8.75    8.06
 -22  10  11    0.17   11.18
 -12  22  11    1.62   11.82
 -22  10  12   17.33   14.58
 -12  22  12   -0.02    8.95
 -22  10  13  -11.82   13.38
 -12  22  13   12.62   19.87
   9  13  -5   16.86   11.12
   9  13  -4   15.60   12.34
  -9 -13  -3   14.29    6.08
   9  13  -3   24.55   14.46
  -9 -13  -2  -12.63    9.92
   9  13  -2   16.67   13.74
  -9 -13  -1    3.95    6.37
   9  13  -1    1.77    7.79
  -9 -13   0    3.17    4.84
   9  13   0   -0.72    8.61
   9  13   1    4.19    8.37
 -13  22   1    8.30    6.23
  -9 -13   1    8.34    5.00
 -13  22   2   14.22    9.85
 -22   9   3   19.31    9.62
 -13  22   3   25.34   11.09
 -13  22   4    9.50    5.82
  -9 -13   4   16.43    6.10
 -22   9   4   23.57   10.10
  -9 -13   5    6.42    4.68
 -13  22   5   -1.03    9.81
 -13  22   6    4.50    3.17
  -9 -13   6    4.38    4.89
  -9 -13   7    9.94    6.03
 -13  22   7   25.14   15.31
  -9 -13   8   34.01   10.73
 -13  22   8   48.63   19.78
 -22   9   9    5.99    7.46
 -13  22   9  -10.78   10.25
 -22   9  10    3.33    8.42
 -13  22  10   11.89   13.73
 -22   9  11  -10.84   13.94
 -13  22  11    0.39   11.02
 -22   9  12   46.76   21.75
 -13  22  12  -15.90   13.38
 -22   9  13   15.74   15.79
 -13  22  13   22.49   20.27
   8  14  -4   71.10   23.24
  -8 -14  -4   70.87   19.73
   8  14  -3   34.80   16.90
  -8 -14  -3   16.48   10.84
   8  14  -2   64.82   21.32
  -8 -14  -2   31.06    8.63
  -8 -14  -1   -7.09    8.27
   8  14  -1    2.16    8.90
  -8 -14   0   15.14    5.90
   8  14   0   21.53   10.75
  -8 -14   1   -0.78    4.35
   8  14   1   -7.93   10.84
   8  14   2   48.01   16.86
 -14  22   2   49.48   14.58
  -8 -14   2   34.27    8.15
 -14  22   3   33.82   14.44
 -22   8   3   38.56   13.79
  -8 -14   4   42.09    7.35
 -22   8   4   67.47   17.71
 -14  22   4   58.99   18.80
 -14  22   5   80.56   21.53
  -8 -14   5   47.15    8.18
 -14  22   6    0.80   10.12
 -14  22   6    4.78    4.54
  -8 -14   6   12.47    4.59
  -8 -14   7   -0.91    3.99
 -14  22   7  -29.21   18.50
 -14  22   8   24.67   15.45
 -22   8   9   16.83   15.27
 -14  22   9   15.72   13.60
 -22   8  10    0.89    7.99
 -14  22  10    3.47   11.86
 -22   8  11   12.10   12.55
 -14  22  11   17.78   16.06
 -22   8  12   15.21   11.73
 -14  22  12  -30.26   18.97
 -22   8  13  -13.21   16.38
 -14  22  13   -2.83    9.27
  -7 -15  -4  116.20   23.43
   7  15  -3   71.89   22.91
  -7 -15  -3   50.94   15.64
  -7 -15  -2   10.84    8.70
   7  15  -2   30.44   16.83
  -7 -15  -1    7.74    6.34
   7  15  -1    9.59   10.42
   7  15   0  -11.98   10.94
  -7 -15   0    3.53    3.52
  -7 -15   1    3.73    2.92
   7  15   1  -11.81   12.06
  -7 -15   2    1.21    1.89
   7  15   2    6.75    9.70
 -15  22   3   88.17   21.12
 -15  22   4  111.98   24.54
 -15  22   5   20.33   12.60
 -15  22   6    7.62    7.01
 -15  22   6   15.90    5.32
 -15  22   7   12.16   11.24
 -15  22   8   -1.63    7.76
 -22   7   9    0.02    7.42
 -15  22   9   11.44   12.21
 -22   7  10   10.47    8.03
 -15  22  10   13.78   15.06
 -22   7  11   24.06   14.68
 -15  22  11   10.91   16.39
 -22   7  12    7.03    8.38
 -15  22  12   49.41   26.27
 -22   7  13    3.09    9.72
  -6 -16  -4   20.39   11.35
  -6 -16  -3    8.06    7.97
   6  16  -2  151.51   30.77
  -6 -16  -2  113.76   19.71
   6  16  -1   29.41   16.60
  -6 -16  -1   22.63    8.68
   6  16   0   -6.52    6.99
  -6 -16   0   21.55    7.27
  -6 -16   1   13.54    4.65
   6  16   1    7.10    9.34
   6  16   2  117.91   25.73
 -16  22   3    9.35    8.65
   6  16   3   24.21   14.28
 -16  22   4   23.11   13.94
 -16  22   5   17.13   11.64
 -16  22   6   19.63   13.79
 -16  22   6   10.97    4.18
 -16  22   7   -8.11    8.54
 -16  22   8    4.48    7.10
 -22   6   9   10.76   11.07
 -16  22   9    3.21    9.34
 -22   6  10   26.30   17.56
 -16  22  10   24.84   18.24
 -22   6  11   34.85   20.64
 -16  22  11   28.28   20.75
 -22   6  12   34.17   19.33
 -16  22  12   25.98   19.44
 -22   6  13    2.47   11.24
  -5 -17  -4    8.70    8.10
  -5 -17  -3   -6.57    8.09
  -5 -17  -2   29.87   10.31
   5  17  -2   49.12   19.58
   5  17  -1   10.37    8.41
  -5 -17  -1   -4.37    5.84
   5  17   0    1.43    6.74
  -5 -17   0    0.59    2.76
   5  17   1  -13.67   14.53
   5  17   2    5.85   11.68
   5  17   3   15.97   13.42
 -17  22   4   42.82   17.26
 -17  22   5    8.86   10.46
 -17  22   6   11.97   12.29
 -17  22   7   10.38   11.39
 -17  22   8   13.68   13.81
 -22   5   9    5.13    7.95
 -17  22   9  -14.41   13.70
 -22   5  10   13.74   15.69
 -17  22  10   -8.64    9.50
 -22   5  11   22.17   16.74
 -17  22  11   14.72   17.70
 -22   5  12  -21.34   13.02
 -17  22  12   21.33   18.47
 -22   5  13  -13.47   10.34
  -4 -18  -4   43.01   14.37
  -4 -18  -3    3.73    5.26
  -4 -18  -2   11.82    6.45
  -4 -18  -1   16.38    6.40
   4  18  -1   18.61   11.29
   4  18   0   -6.23   11.43
  -4 -18   0    3.43    3.14
   4  18   1   -7.89   11.51
   4  18   2   33.81   12.91
[truncated: 131,779 more chars]
